# Supplementary material for: The cyclization/rearrangement of α-hydroxy ketones with trifluoromethyl N-acylhydrazones to synthesize multi-substituted trifluoromethyloxazolines
Source: Royal Society of Chemistry journal article supplement (doi:10.1039/d3cc03854h), 2023-01-01
Supplement: d3cc03854h1.pdf [file d3cc03854h1.pdf]

## Supporting Information

# The Cyclization/Rearrangement of $\alpha$ -Hydroxy Ketones with Trifluoromethyl N-acylhydrazones to Synthesize Multi-substituted Trifluoromethyloxazolines

Junjiao Wang <sup>\*a</sup>, Yongwei Shang <sup>a</sup>, Xiujuan Zhao <sup>a</sup>, Zhenli Cui <sup>a</sup>, Yang Li <sup>a</sup>  
Ke-Hu Wang <sup>a</sup>, DanFeng Huang <sup>a</sup>, Yulai Hu<sup>\*a</sup>, Na Wang <sup>b</sup>, Lei Feng<sup>b</sup>,

<sup>a</sup>College of Chemistry and Chemical Engineering, Northwest Normal University, Lanzhou 730070, P. R. China.

<sup>b</sup>Gansu Computation Center, Lanzhou 730000, P. R. China.

### Contents:

|                                                                                      |     |
|--------------------------------------------------------------------------------------|-----|
| 1. General Information .....                                                         | 2   |
| 2. General Procedures .....                                                          | 3   |
| 2.1. General procedure for the synthesis of $\alpha$ -hydroxy ketones 1 .....        | 3   |
| 2.2. General procedure for the synthesis of trifluoromethyl N-acylhydrazones 2 ..... | 3   |
| 2.3. General procedure for the synthesis of compounds 3 and 4:.....                  | 4   |
| 2.4. Partial condition optimization .....                                            | 4   |
| 2.5. Characterization data of compounds 3 and 4 .....                                | 6   |
| 3. References and notes.....                                                         | 24  |
| 4. Single Crystal X-Ray Structure Determinations of Compounds 3a .....               | 25  |
| 5. Copies of NMR Spectra .....                                                       | 33  |
| 6. Control experiments.....                                                          | 106 |
| 7. Theoretical caculation .....                                                      | 108 |
| 8. HRMS(ESI) copy of active intermediates .....                                      | 113 |
| 9. References and notes.....                                                         | 117 |
| 10. Cartesian coordinates .....                                                      | 118 |

## 1. General Information

All reactions were performed in dried glassware with magnetic stirring bar and sealed with a rubber septum. The solvents were distilled by standard methods. Reagents were obtained from commercial suppliers and used without further purification unless otherwise noted. Silica gel column chromatography was carried out using silica Gel 60 (230–400 mesh). Analytical thin layer chromatography (TLC) was done using silica Gel (silica gel 60 F254). TLC plates were analyzed by an exposure to ultraviolet (UV) light and/or submersion in phosphomolybdic acid solution or submersion in KMnO<sub>4</sub> solution or in Iodine vapor. NMR experiments were carried out in CDCl<sub>3</sub> or acetone-*d*<sub>6</sub>. <sup>1</sup>H NMR, <sup>13</sup>C{<sup>1</sup>H} NMR and <sup>19</sup>F NMR spectra were recorded at 400 MHz or 600 MHz, 100 MHz or 150 MHz and 376 MHz spectrometers, respectively. Chemical shifts are reported as  $\delta$  values relative to internal TMS ( $\delta$  0.00 ppm for <sup>1</sup>H NMR), chloroform ( $\delta$  7.26 ppm for <sup>1</sup>H NMR), chloroform ( $\delta$  77.00 ppm for <sup>13</sup>C NMR) and CFCl<sub>3</sub> ( $\delta$  0.00 ppm for <sup>19</sup>F NMR) in parts per million (ppm). The following abbreviations are used for the multiplicities: s: singlet, d: doublet, dd: doublet of doublet, t: triplet, q: quartet, m: multiplet; Coupling constants (*J*) are reported in Hertz (Hz). Melting points were uncorrected. High resolution mass spectra (HRMS) were recorded on Micro TOF-QII mass instrument (ESI). The relative configuration of **3a** was determined by NMR Data, molecular weight and x-ray single crystal diffraction. Substrates **1** were synthesized according to the published procedures.<sup>1</sup> Substrates **2** were prepared according to the literature method.<sup>2</sup>

## 2. General Procedures

### 2.1. General procedure for the synthesis of $\alpha$ -hydroxy ketones **1**

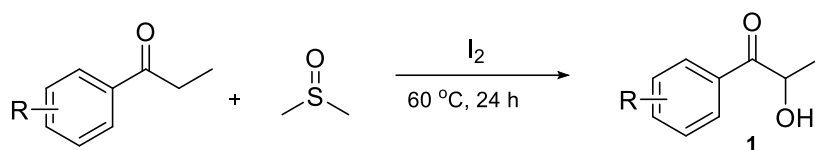

**Scheme S1** Preparation of the  $\alpha$ -hydroxy ketone **1a-1m**

Ketone (10 mmol),  $I_2$  (20 mol%), and DMSO (10 mL) and a stir bar were added to a 25 mL reaction tube under air. The mixture was stirred at 60 °C for 24h as monitored by TLC. After cooling down to room temperature, the solution was diluted with ethyl acetate (20 mL) and washed with 0.1 mol/L  $Na_2S_2O_3$  (10 mL) aqueous solution, extracted with ethyl acetate (3×10 mL), and evaporated under vacuum. The crude reaction mixture was purified by column chromatography on silica gel (eluent: petroleum ether / ethyl acetate = 20:1) to get the desired product **1a-1m**.

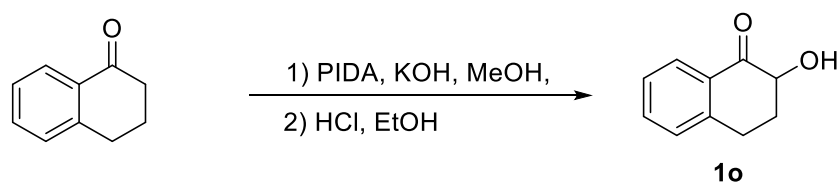

**Scheme S2** Preparation of the hydroxy ketone **1o**

A solution of the corresponding ketone (70 mmol) in MeOH (0.2 mmol/mL) was added to a previously prepared ice-cooled solution of KOH (210 mmol) in MeOH (1.2 mmol/mL) over 5 min. Solid iodobenzene diacetate (77 mmol) was added in portions at 0 °C during 5 min and the resulting mixture was stirred at 0 °C for 1 hour and then at room temperature overnight. Organic solvents were removed under reduced pressure to give a residue which was dissolved in  $Et_2O$ , washed with water and evaporated. The residue was dissolved in EtOH (50 mL) and 6M HCl aq. (70 mL) was added. It was stirred at room temperature for 30 min, and then basified with  $K_2CO_3$  and extracted with  $Et_2O$ . The combined organic layers were washed with brine, dried over anhydrous  $Na_2SO_4$  and concentrated under reduced pressure. The crude product was purified by flash column chromatography to give the corresponding  $\alpha$ -hydroxy ketone **1o**.

### 2.2. General procedure for the synthesis of trifluoromethyl N-acylhydrazones **2**

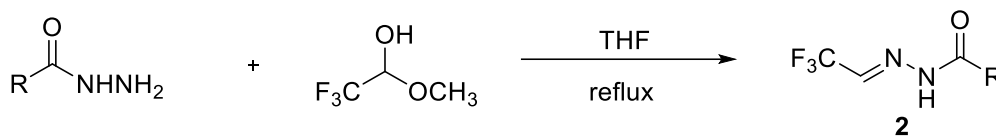

### Scheme S3 Preparation of the trifluoromethyl *N*-acylhydrazones **2**

A solution of 1 mmol of the corresponding hydrazide and 1 mmol (116 mg) of Trifluoroacetaldehyde methyl hemiacetal in 1 mL of MeOH was placed in a glass tube. After addition of freshly dried molecular sieves (4 Å), the tube was closed and heated in an oil bath to 75 °C for 24 h. Then, the mixture was cooled, filtered, and washed with a portion of MeOH. The solvent of the combined solutions was evaporated, and the crude products obtained were purified by column chromatography or on preparative thin layer plates (SiO<sub>2</sub>). acylhydrazone **2** were isolated as crystalline materials. Analytically pure samples were obtained after recrystallization.

### 2.3. General procedure for the synthesis of compounds **3** and **4**:

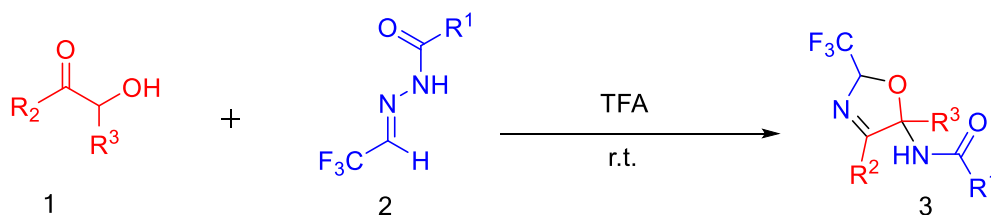

### Scheme S4 Preparation of the oxazoline **3** and **4**

$\alpha$ -Hydroxyl ketone **1** (0.6 mmol, 1.2 equiv.), trifluoromethyl *N*-acylhydrazones **2** (0.5 mmol, 1 equiv.) were added to the reaction tube under air atmosphere, and then 2.5 mL of trifluoroacetic acid was added as the solvent. The mixture was stirred at room temperature and the progress of the reaction was monitored by TLC. After the reaction was completed, the reaction was quenched with saturated NaHCO<sub>3</sub>, and then the mixture was extracted with ethyl acetate (20 ml  $\times$  3). The combined organic extracts were dried over anhydrous MgSO<sub>4</sub> and concentrated in vacuum. Purification of the residue by silica gel column chromatography using petroleum ether: ethyl acetate (5:1) as eluent furnished the products **3** and **4**.

### 2.4. Partial condition optimization

The influence of various solvents was also examined. After stirring at 25 °C for 48 hours, none of the reactions occurred when AcOH, TFE, CH<sub>3</sub>CN, DCE or THF were used as solvents (**Table S1**).

### Table S1 Condition optimization

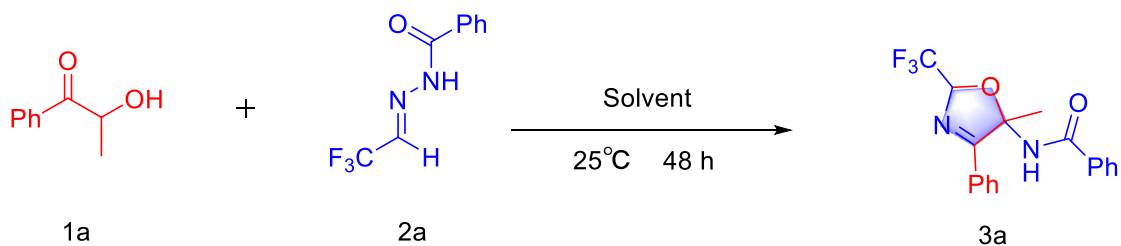

| Entry | Mole ratio of 1a/2a | Solvents           | Volume of solvent(mL) | Temp. ( $^\circ\text{C}$ ) | <b>3a</b> <sup>b</sup> yield(%) |
|-------|---------------------|--------------------|-----------------------|----------------------------|---------------------------------|
| 1     | 1.2: 1              | AcOH               | 2                     | 25                         | N. R                            |
| 2     | 1.2: 1              | TFE                | 2                     | 25                         | N. R                            |
| 3     | 1.2: 1              | CH <sub>3</sub> CN | 2                     | 25                         | N. R                            |
| 4     | 1.2: 1              | DCE                | 2                     | 25                         | N. R                            |
| 5     | 1.2: 1              | THF                | 2                     | 25                         | N. R                            |

<sup>a</sup>Reaction conditions: **1a** (0.6 mmol 90 mg), **2a** (0.6 mmol 108 mg). <sup>b</sup> Isolated yields. <sup>c</sup> Under argon atmosphere

The influence of stoichiometric acid as the promoter was also examined. Selected other neutral solvent such as CH<sub>3</sub>CN, THF, TFE, DCM or DCE. After stirring at 25  $^\circ\text{C}$  for 48 hours, little or none of the reactions occurred (**Table S2**).

### Table S2 Using TFA as a reagent for further optimization

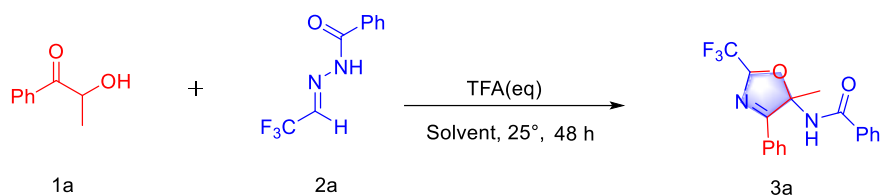

| Entry | Mole ratio of 1a/2a/TFA | Solvents | Temp . (°C) | 3a <sup>b</sup> yield (%) |
|-------|-------------------------|----------|-------------|---------------------------|
| 1     | 1.2: 1: 1               | MeCN     | 25          | ND                        |
| 2     | 1.2: 1: 2               | MeCN     | 25          | ND                        |
| 3     | 1.2: 1: 4               | MeCN     | 25          | ND                        |
| 4     | 1.2: 1: 1               | THF      | 25          | ND                        |
| 5     | 1.2: 1: 2               | THF      | 25          | ND                        |
| 6     | 1.2: 1: 4               | THF      | 25          | ND                        |
| 7     | 1.2: 1: 1               | TFE      | 25          | ND                        |
| 8     | 1.2: 1: 2               | TFE      | 25          | ND                        |
| 9     | 1.2: 1: 4               | TFE      | 25          | ND                        |
| 10    | 1.2: 1: 1               | DCM      | 25          | ND                        |
| 11    | 1.2: 1: 2               | DCM      | 25          | ND                        |
| 12    | 1.2: 1: 4               | DCM      | 25          | trace                     |
| 13    | 1.2: 1: 1               | DCE      | 25          | ND                        |
| 14    | 1.2: 1: 2               | DCE      | 25          | ND                        |
| 15    | 1.2: 1: 4               | DCE      | 25          | trace                     |

<sup>a</sup>Reaction conditions: **1a** (0.6 mmol 90 mg), **2a** (0.6 mmol 108 mg). <sup>b</sup> Isolated yields.

## 2.5. Characterization data of compounds 3 and 4

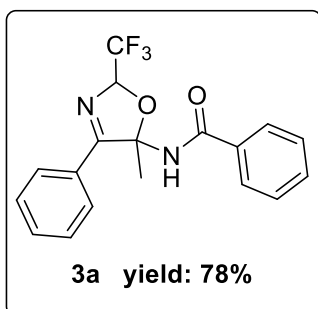

*N*-(5-Methyl-4-phenyl-2-(trifluoromethyl)-2,5-dihydrooxazol-5-yl) benzamide (**3a**). Purified by column chromatography (EA/PE, 1:5). White solid (131 mg, 75% yield), m.p.: 203–205 °C; <sup>1</sup>H NMR (400 MHz, CDCl<sub>3</sub>) δ 8.01 (d, *J* = 7.2 Hz, 2H), 7.74 (d, *J* = 7.2 Hz, 2H), 7.55–7.38 (m, 6H), 7.11 (s, 1H), 6.28 (q, *J* = 5.2 Hz, 1H), 1.85 (s, 3H); <sup>13</sup>C NMR (150 MHz, CDCl<sub>3</sub>) δ 170.6 (Cq), 167.1 (Cq), 133.1 (Cq), 132.4 (Cq), 131.9 (CH), 129.3 (CH),

128.8 (CH), 128.7 (CH), 128.1 (CH), 127.1 (CH), 122.3 (q,  $J_{C-F} = 280.1$  Hz) (Cq), 99.2 (q,  $J_{C-F} = 32.3$  Hz) (CH), 96.0 (Cq), 26.6 (CH<sub>3</sub>); <sup>19</sup>F NMR (376 MHz, CDCl<sub>3</sub>)  $\delta$  -80.09 (d,  $J = 4.9$  Hz); HRMS (ESI):  $m/z$  calcd for chemical formula: C<sub>18</sub>H<sub>16</sub>F<sub>3</sub>N<sub>2</sub>O<sub>2</sub> [M + H]<sup>+</sup> 349.1158; found 349.1158.

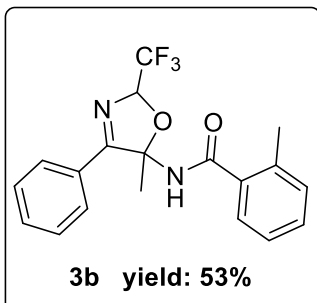

2-Methyl-N-(5-methyl-4-phenyl-2-(trifluoromethyl)-2,5-dihydrooxazol-5-yl) benzamide (**3b**). Purified by column chromatography (EA/PE, 1:5). White solid (96 mg, 53% yield), m.p.: 193–195 °C; <sup>1</sup>H NMR (400 MHz, CDCl<sub>3</sub>)  $\delta$  8.05 (d,  $J = 7.2$  Hz, 2H), 7.52 (t,  $J = 7.6$  Hz, 1H), 7.45 (q,  $J = 7.2$  Hz, 2H), 7.34 (t,  $J = 7.6$  Hz, 2H), 7.21–7.18 (m, 2H), 6.76 (s, 1H), 6.26 (q,  $J = 5.2$  Hz, 1H), 2.27 (s, 3H), 1.81 (s, 3H); <sup>13</sup>C NMR (150 MHz, CDCl<sub>3</sub>)  $\delta$  170.5 (Cq), 169.5 (Cq), 136.7 (Cq), 134.8 (Cq), 132.0 (Cq), 131.3 (CH), 130.0 (CH), 128.7 (CH), 128.2 (CH), 126.4 (CH), 125.8 (CH), 122.3 (q,  $J_{C-F} = 280.5$  Hz) (Cq), 99.2 (q,  $J_{C-F} = 31.5$  Hz) (CH), 95.9 (Cq), 26.5 (CH<sub>3</sub>), 19.0 (CH<sub>3</sub>); <sup>19</sup>F NMR (376 MHz, CDCl<sub>3</sub>)  $\delta$  -79.74 (d,  $J = 4.5$  Hz); HRMS (ESI):  $m/z$  calcd for chemical formula: C<sub>19</sub>H<sub>17</sub>F<sub>3</sub>N<sub>2</sub>O<sub>2</sub>Na [M + Na]<sup>+</sup> 385.1134; found 385.1133.

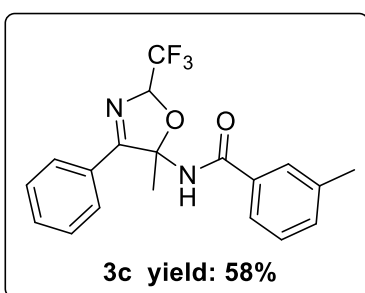

3-Methyl-N-(5-methyl-4-phenyl-2-(trifluoromethyl)-2,5-dihydrooxazol-5-yl)benzamide (**3c**). Purified by column chromatography (EA/PE, 1:5). White solid (105 mg, 58%), m.p.: 217–219 °C; <sup>1</sup>H NMR (400 MHz, CDCl<sub>3</sub>)  $\delta$  8.02 (d,  $J = 7.6$  Hz, 2H), 7.56 (s, 1H), 7.54 (d,  $J = 8.0$  Hz, 1H), 7.49 (t,  $J = 7.2$  Hz, 1H), 7.41 (t,  $J = 7.6$  Hz, 2H), 7.34 (d,  $J = 6.8$  Hz, 2H), 6.94 (s, 1H), 6.29 (q,  $J = 4.8$  Hz, 1H), 2.40 (s, 3H), 1.88 (s, 3H); <sup>13</sup>C NMR (150 MHz, CDCl<sub>3</sub>)  $\delta$  170.6 (Cq), 167.2 (Cq), 138.8 (Cq), 133.1 (Cq), 133.0 (Cq), 131.9 (CH), 129.4 (CH), 128.7 (CH), 128.6 (CH), 128.1 (CH), 127.9 (CH), 124.0 (CH), 121.4 (q,  $J_{C-F} = 279.0$  Hz) (Cq), 99.2 (q,  $J_{C-F} = 31.5$  Hz) (CH), 96.0 (Cq), 26.7 (CH<sub>3</sub>), 21.3 (CH<sub>3</sub>); <sup>19</sup>F NMR (376 MHz,

CDCl<sub>3</sub>)  $\delta$  -84.94 (d,  $J$  = 4.9 Hz); HRMS (ESI):  $m/z$  calcd for chemical formula: C<sub>19</sub>H<sub>18</sub>F<sub>3</sub>N<sub>2</sub>O<sub>2</sub> [M + H]<sup>+</sup> 363.1315; found 363.1314.

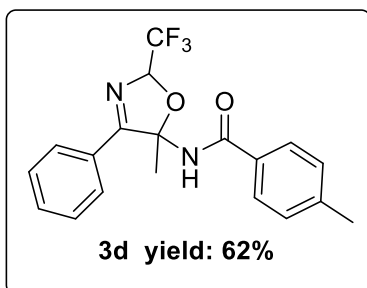

4-Methyl-*N*-(5-methyl-4-phenyl-2-(trifluoromethyl)-2,5-dihydrooxazol-5-yl)benzamide (**3d**). Purified by column chromatography (EA/PE, 1:5). White solid (112 mg, 62%), m.p.: 208–210 °C; <sup>1</sup>H NMR (400 MHz, CDCl<sub>3</sub>)  $\delta$  8.01 (dd,  $J$  = 5.6, 0.8 Hz, 2H), 7.65 (d,  $J$  = 5.6 Hz, 2H), 7.47 (t,  $J$  = 5.2 Hz, 1H), 7.39 (t,  $J$  = 5.2 Hz, 2H), 7.23 (d,  $J$  = 5.2 Hz, 2H), 6.98 (s, 1H), 6.28 (q,  $J$  = 3.2 Hz, 1H), 2.39 (s, 3H), 1.85 (s, 3H); <sup>13</sup>C NMR (150 MHz, CDCl<sub>3</sub>)  $\delta$  170.1 (Cq), 167.0 (Cq), 143.1 (Cq), 131.9 (Cq), 130.3 (Cq), 129.4 (CH), 129.4 (CH), 128.7 (CH), 128.1 (CH), 127.1 (CH), 122.3 (q,  $J_{C-F}$  = 270.0 Hz) (Cq), 99.2 (q,  $J_{C-F}$  = 33.0 Hz) (CH), 96.0 (Cq), 26.7 (CH<sub>3</sub>), 21.5 (CH<sub>3</sub>); <sup>19</sup>F NMR (376 MHz, CDCl<sub>3</sub>)  $\delta$  -80.16 (d,  $J$  = 4.9 Hz); HRMS(ESI):  $m/z$  calcd for chemical formula: C<sub>19</sub>H<sub>18</sub>F<sub>3</sub>N<sub>2</sub>O<sub>2</sub> [M + H]<sup>+</sup> 363.1315; found 363.1313.

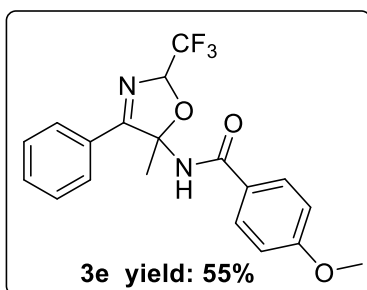

4-Methoxy-*N*-(5-methyl-4-phenyl-2-(trifluoromethyl)-2,5-dihydrooxazol-5-yl)benzamide (**3e**). Purified by column chromatography (EA/PE, 1:5). White solid (104 mg, 55%), m.p.: 262–264 °C; <sup>1</sup>H NMR (400 MHz, CDCl<sub>3</sub>)  $\delta$  8.01 (d,  $J$  = 7.2 Hz, 2H), 7.73 (d,  $J$  = 9.2 Hz, 2H), 7.48 (t,  $J$  = 7.6 Hz, 1H), 7.40 (t,  $J$  = 8.0 Hz, 2H), 6.94–6.91 (m, 3H), 6.28 (q,  $J$  = 5.2 Hz, 1H), 3.85 (s, 3H), 1.86 (s, 3H); <sup>13</sup>C NMR (150 MHz, CDCl<sub>3</sub>)  $\delta$  170.7 (Cq), 166.5 (Cq), 162.9 (Cq), 131.8 (Cq), 129.5 (CH), 129.1 (CH), 128.7 (CH), 128.1 (CH), 125.3 (Cq), 122.4 (q,  $J_{C-F}$  = 280.5 Hz) (Cq), 114.0 (CH), 99.3 (q,  $J_{C-F}$  = 31.5.0 Hz) (CH), 96.0 (Cq), 55.5 (CH<sub>3</sub>), 26.7 (CH<sub>3</sub>); <sup>19</sup>F NMR (376 MHz, CDCl<sub>3</sub>)  $\delta$  -80.18 (d,  $J$  = 4.9 Hz). HRMS(ESI):  $m/z$  calcd for chemical formula: C<sub>19</sub>H<sub>16</sub>F<sub>3</sub>N<sub>2</sub>O<sub>3</sub> [M – H]<sup>+</sup> 377.1112; found 377.1121.



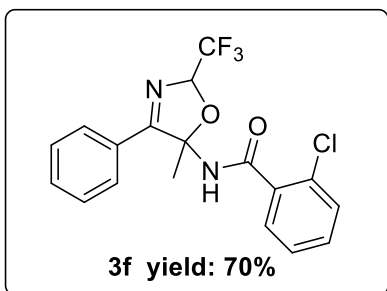

2-Chloro-*N*-(5-methyl-4-phenyl-2-(trifluoromethyl)-2,5-dihydrooxazol-5-yl) benzamide (**3f**). Purified by column chromatography (EA/PE, 1:5). White solid (114 mg, 70%), m.p.: 182–184 °C; <sup>1</sup>H NMR (400 MHz, CDCl<sub>3</sub>) δ 8.08 (d, *J* = 7.2 Hz, 2H), 7.63 (d, *J* = 8.4 Hz, 1H), 7.51 (t, *J* = 7.6 Hz, 1H), 7.45 – 7.36 (m, 4H), 7.33 – 7.28 (m, 2H), 6.29 (q, *J* = 4.8 Hz, 1H), 1.85 (s, 3H); <sup>13</sup>C NMR (150 MHz, CDCl<sub>3</sub>) δ 170.3 (Cq), 165.7 (Cq), 133.3 (Cq), 132.2 (Cq), 132.0 (CH), 130.9 (Cq), 130.5 (CH), 130.4 (CH), 129.2 (CH), 128.7 (CH), 128.4 (CH), 127.4 (CH), 122.4 (q, *J*<sub>C-F</sub> = 268.5 Hz) (Cq), 99.3 (q, *J*<sub>C-F</sub> = 33.0 Hz) (CH), 94.0 (Cq), 26.5 (CH<sub>3</sub>); <sup>19</sup>F NMR (376 MHz, CDCl<sub>3</sub>) δ -79.75 (d, *J* = 5.3 Hz); HRMS(ESI): *m/z* calcd for chemical formula: C<sub>18</sub>H<sub>15</sub>ClF<sub>3</sub>N<sub>2</sub>O<sub>2</sub> [M + H]<sup>+</sup> 383.0769; found 383.0769.

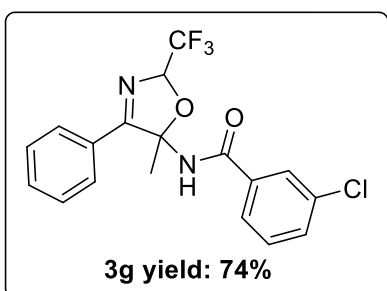

3-Chloro-*N*-(5-methyl-4-phenyl-2-(trifluoromethyl)-2,5-dihydrooxazol-5-yl) benzamide (**3g**). Purified by column chromatography (EA/PE, 1:5). White solid (141 mg, 74%), m.p.: 187–189 °C; <sup>1</sup>H NMR (400 MHz, CDCl<sub>3</sub>) δ 8.07 (d, *J* = 7.6 Hz, 2H), 7.58 (d, *J* = 6.8 Hz, 1H), 7.51 (t, *J* = 7.2 Hz, 1H), 7.45 – 7.26 (m, 6H), 6.27 (q, *J* = 4.8 Hz, 1H), 1.82 (s, 3H); <sup>13</sup>C NMR (150 MHz, CDCl<sub>3</sub>) δ 170.3 (Cq), 165.8 (Cq), 135.0 (Cq), 134.9 (Cq), 132.4 (Cq), 130.1 (CH), 130.1 (CH), 129.2 (CH), 128.8 (CH), 128.1 (CH), 127.4 (CH), 125.2 (CH), 122.2 (q, *J*<sub>C-F</sub> = 280.2 Hz) (Cq), 99.3 (q, *J*<sub>C-F</sub> = 32.9 Hz) (CH), 96.0 (Cq), 26.6 (CH<sub>3</sub>); <sup>19</sup>F NMR (376 MHz, CDCl<sub>3</sub>) δ -80.14 (d, *J* = 4.5 Hz); HRMS(ESI): *m/z* calcd for chemical formula: C<sub>18</sub>H<sub>15</sub>ClF<sub>3</sub>N<sub>2</sub>O<sub>2</sub> [M + H]<sup>+</sup> 383.0769; found 383.0769.

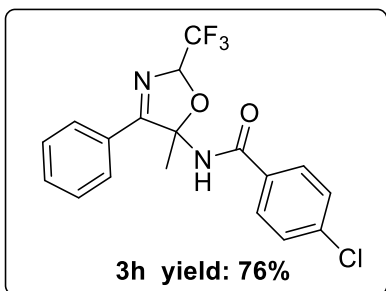

4-Chloro-*N*-(5-methyl-4-phenyl-2-(trifluoromethyl)-2,5-dihydrooxazol-5-yl) benzamide (**3h**). Purified by column chromatography (EA/PE, 1:5). White solid (145 mg, 76%), m.p.: 212–214 °C;  $^1\text{H}$  NMR (400 MHz,  $\text{CDCl}_3$ )  $\delta$  8.00 (d,  $J = 7.2$  Hz, 2H), 7.69 (d,  $J = 8.4$  Hz, 2H), 7.50 (d,  $J = 7.2$  Hz, 1H), 7.43 – 7.39 (m, 4H), 6.95 (s, 1H), 6.28 (q,  $J = 4.8$  Hz, 1H), 1.88 (s, 3H);  $^{13}\text{C}$  NMR (150 MHz,  $\text{CDCl}_3$ )  $\delta$  170.4 (Cq), 166.1 (Cq), 138.8 (Cq), 132.0 (Cq), 131.5 (Cq), 129.2 (CH), 129.1 (CH), 128.8 (CH), 128.5 (CH), 128.1 (CH), 122.3 (q,  $J_{\text{C-F}} = 280.5$  Hz) (Cq), 99.3 (q,  $J_{\text{C-F}} = 33.0$  Hz), 96.0 (Cq), 26.6 ( $\text{CH}_3$ );  $^{19}\text{F}$  NMR (376 MHz,  $\text{CDCl}_3$ )  $\delta$  -80.17 (d,  $J = 5.3$  Hz); HRMS(ESI):  $m/z$  calcd for chemical formula:  $\text{C}_{18}\text{H}_{13}\text{ClF}_3\text{N}_2\text{O}_2$  [ $\text{M} - \text{H}$ ] $^+$  381.0623; found 381.0623.

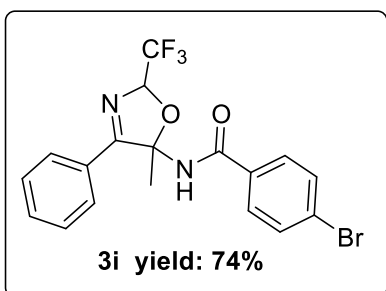

4-Bromo-*N*-(5-methyl-4-phenyl-2-(trifluoromethyl)-2,5-dihydrooxazol-5-yl) benzamide (**3i**). Purified by column chromatography (EA/PE, 1:5). White solid (158 mg, 74%), m.p.: 218–220 °C;  $^1\text{H}$  NMR (400 MHz,  $\text{CDCl}_3$ )  $\delta$  8.00 (d,  $J = 7.2$  Hz, 2H), 7.61 (d,  $J = 8.4$  Hz, 2H), 7.57 (d,  $J = 8.4$  Hz, 2H), 7.52 – 7.48 (m, 1H), 7.41 (t,  $J = 7.6$  Hz, 2H), 6.96 (s, 1H), 6.27 (q,  $J = 4.8$  Hz, 1H), 1.88 (s, 3H);  $^{13}\text{C}$  NMR (150 MHz,  $\text{CDCl}_3$ )  $\delta$  170.3 (Cq), 166.1 (Cq), 132.1 (Cq), 132.0 (Cq), 131.9 (CH), 129.2 (CH), 128.8 (CH), 128.7 (CH), 128.1 (CH), 127.3 (Cq), 122.3 (q,  $J_{\text{C-F}} = 280.5$  Hz) (Cq), 99.3 (q,  $J_{\text{C-F}} = 33.0$  Hz) (CH), 96.0 (Cq), 26.6 ( $\text{CH}_3$ );  $^{19}\text{F}$  NMR (376 MHz,  $\text{CDCl}_3$ )  $\delta$  -80.16 (d,  $J = 4.9$  Hz); HRMS(ESI):  $m/z$  calcd for chemical formula:  $\text{C}_{18}\text{H}_{15}\text{BrF}_3\text{N}_2\text{O}_2$  [ $\text{M} + \text{H}$ ] $^+$  427.0264; found 427.0264.

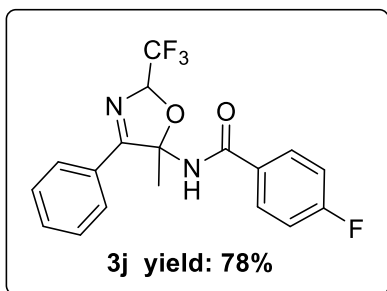

4-fluoro-*N*-(5-methyl-4-phenyl-2-(trifluoromethyl)-2,5-dihydrooxazol-5-yl) benzamide (**3j**). Purified by column chromatography (EA/PE, 1:5). White solid (143 mg, 78%), m.p.: 200–202 °C; <sup>1</sup>H NMR (400 MHz, CDCl<sub>3</sub>) δ 8.01 (d, *J* = 7.2 Hz, 2H), 7.76 – 7.73 (m, 2H), 7.49 (t, *J* = 7.2 Hz, 1H), 7.41 (t, *J* = 8.0 Hz, 2H), 7.11 – 7.06 (m, 3H), 6.27 (q, *J* = 4.8 Hz, 1H), 1.86 (s, 3H); <sup>13</sup>C NMR (150 MHz, CDCl<sub>3</sub>) δ 170.5 (Cq), 166.1 (Cq), 165.2 (q, *J*<sub>C-F</sub> = 253.5 Hz) (Cq), 132.0 (Cq), 129.5 (d, *J*<sub>C-F</sub> = 6.0 Hz) (CH), 129.3 (d, *J*<sub>C-F</sub> = 3.0 Hz) (Cq), 129.2 (CH), 128.8 (CH), 128.1 (CH), 122.3 (q, *J*<sub>C-F</sub> = 279.0 Hz) (CH), 115.9 (d, *J*<sub>C-F</sub> = 22.5 Hz) (CH), 99.2 (q, *J*<sub>C-F</sub> = 31.5 Hz) (CH), 95.6 (Cq), 27.3 (CH<sub>3</sub>); <sup>19</sup>F NMR (376 MHz, CDCl<sub>3</sub>) δ -79.74 (d, *J* = 7.5 Hz), -106.17 – -106.24 (m); HRMS(ESI): *m/z* calcd for chemical formula: C<sub>18</sub>H<sub>14</sub>F<sub>4</sub>N<sub>2</sub>NaO<sub>2</sub> [M + Na]<sup>+</sup> 389.0884; found 389.0883.

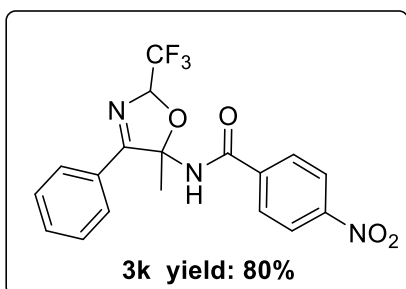

*N*-(5-Methyl-4-phenyl-2-(trifluoromethyl)-2,5-dihydrooxazol-5-yl)-4-nitrobenzamide (**3k**). Purified by column chromatography (EA/PE, 1:5). White solid (157 mg, 80%), m.p.: 234–236 °C; <sup>1</sup>H NMR (400 MHz, acetone-*d*<sub>6</sub>) δ 9.22 (s, 1H), 8.32 (d, *J* = 8.8 Hz, 2H), 8.18 – 8.16 (m, 4H), 7.56 (t, *J* = 7.6 Hz, 1H), 7.50 (t, *J* = 7.6 Hz, 2H), 6.32 (q, *J* = 5.2 Hz, 1H), 1.93 (s, 3H); <sup>13</sup>C NMR (150 MHz, acetone-*d*<sub>6</sub>) δ 171.3 (Cq), 165.4 (Cq), 150.0 (Cq), 139.2 (Cq), 132.0 (Cq), 129.4 (CH), 129.0 (CH), 128.8 (CH), 123.5 (CH), 128.2 (CH), 120.7 (q, *J*<sub>C-F</sub> = 294.0 Hz) (Cq), 99.5 (q, *J*<sub>C-F</sub> = 33.0 Hz) (CH), 96.7 (Cq), 25.6 (CH<sub>3</sub>); <sup>19</sup>F NMR (376 MHz, acetone-*d*<sub>6</sub>) δ -80.38 (d, *J* = 5.3 Hz); HRMS(ESI): *m/z* calcd for chemical formula: C<sub>18</sub>H<sub>15</sub>F<sub>3</sub>N<sub>3</sub>O<sub>4</sub> [M + H]<sup>+</sup> 394.1009; found 394.1010.

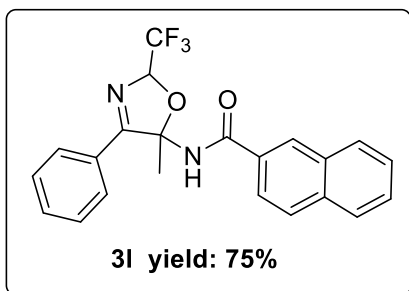

*N*-(5-Methyl-4-phenyl-2-(trifluoromethyl)-2,5-dihydrooxazol-5-yl)-2-naphthamide (**3l**). Purified by column chromatography (EA/PE, 1:5). White solid (149 mg, 75%), m.p.: 206–208 °C;  $^1\text{H}$  NMR (400 MHz,  $\text{CDCl}_3$ )  $\delta$  8.25 (s, 1H), 8.05 (d,  $J = 7.2$  Hz, 2H), 7.87–7.83 (m, 3H), 7.75 (dd,  $J = 8.4, 1.6$  Hz, 1H), 7.60 – 7.50 (m, 2H), 7.47 (t,  $J = 7.2$  Hz, 1H), 7.39 (t,  $J = 7.6$  Hz, 2H), 7.29 (s, 1H), 6.34 (q,  $J = 5.2$  Hz, 1H), 1.91 (s, 3H);  $^{13}\text{C}$  NMR (150 MHz,  $\text{CDCl}_3$ )  $\delta$  170.6 (Cq), 167.2 (Cq), 135.0 (Cq), 132.4 (Cq), 131.9 (Cq), 130.3 (Cq), 129.4 (CH), 129.0 (CH), 128.8 (CH), 128.2 (CH), 127.9 (CH), 127.8 (CH), 127.0 (CH), 123.2 (CH), 122.3 (q,  $J_{\text{C-F}} = 279.6$  Hz) (Cq), 99.3 (q,  $J_{\text{C-F}} = 33.0$  Hz) (CH), 96.1 (Cq), 26.7 ( $\text{CH}_3$ );  $^{19}\text{F}$  NMR (376 MHz,  $\text{CDCl}_3$ )  $\delta$  -80.09 (d,  $J = 4.9$  Hz). HRMS(ESI):  $m/z$  calcd for chemical formula:  $\text{C}_{22}\text{H}_{18}\text{F}_3\text{N}_2\text{O}_2$  [ $\text{M} + \text{H}$ ] $^+$  399.1315; found 399.1313.

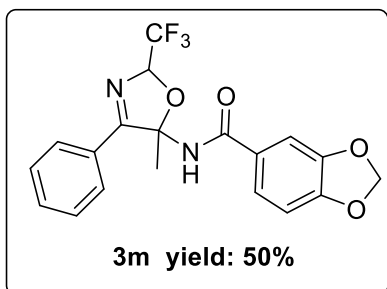

*N*-(5-Methyl-4-phenyl-2-(trifluoromethyl)-2,5-dihydrooxazol-5-yl) benzo[*d*] [1,3] dioxole-5-carboxamide (**3m**). Purified by column chromatography (EA/PE, 1:5). White solid (98 mg, 50%), m.p.: 213–215 °C;  $^1\text{H}$  NMR (400 MHz,  $\text{CDCl}_3$ )  $\delta$  8.00 (d,  $J = 8.0$  Hz, 2H), 7.48 (t,  $J = 7.6$  Hz, 1H), 7.40 (t,  $J = 8.4$  Hz, 2H), 7.30 – 7.26 (m, 1H), 7.22 (d,  $J = 1.6$  Hz, 1H), 6.88 (s, 1H), 6.82 (d,  $J = 8.1$  Hz, 1H), 6.27 (q,  $J = 5.2$  Hz, 1H), 6.03 (s, 2H), 1.85 (s, 3H);  $^{13}\text{C}$  NMR (150 MHz,  $\text{CDCl}_3$ )  $\delta$  170.5 (Cq), 166.2 (Cq), 151.1 (Cq), 148.2 (Cq), 131.9 (Cq), 129.4 (CH), 128.7 (CH), 128.1 (Cq), 127.3 (CH), 122.3 (q,  $J_{\text{C-F}} = 280.5$  Hz) (Cq), 121.4 (CH), 108.1 (CH), 107.7 (CH), 101.9 (CH), 99.2 (q,  $J_{\text{C-F}} = 33.0$  Hz) (CH), 96.0 (Cq), 26.7 ( $\text{CH}_3$ );  $^{19}\text{F}$  NMR (376 MHz,  $\text{CDCl}_3$ )  $\delta$  -80.17 (d,  $J = 5.3$  Hz). HRMS(ESI):  $m/z$  calcd for chemical formula:  $\text{C}_{19}\text{H}_{16}\text{F}_3\text{N}_2\text{O}_4$  [ $\text{M} + \text{H}$ ] $^+$  393.1057; found 393.1056.

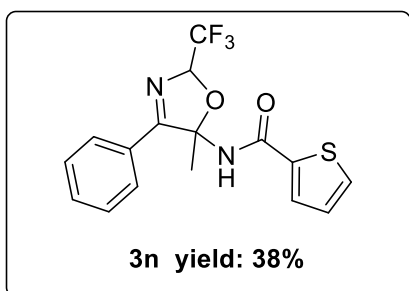

*N*-(5-Methyl-4-phenyl-2-(trifluoromethyl)-2,5-dihydrooxazol-5-yl) thiophene-2 carboxamide (**3n**). Purified by column chromatography (EA/PE, 1:5). White solid (67 mg, 38%), m.p.: 214–216 °C; <sup>1</sup>H NMR (400 MHz, CDCl<sub>3</sub>) δ 8.02 (d, *J* = 7.2 Hz, 2H), 7.56 (dd, *J* = 4.0, 1.2 Hz, 1H), 7.54 (dd, *J* = 4.8, 0.8 Hz, 1H), 7.49 (t, *J* = 7.6 Hz, 1H), 7.43–7.41 (m, 2H), 7.10 (dd, *J* = 4.8, 3.6 Hz, 1H), 6.82 (s, 1H), 6.27 (q, *J* = 4.8 Hz, 1H), 1.86 (s, 3H); <sup>13</sup>C NMR (150 MHz, CDCl<sub>3</sub>) δ 170.4 (Cq), 161.6 (Cq), 137.4 (Cq), 132.0 (Cq), 131.5 (CH), 129.4 (CH), 129.2 (CH), 128.8 (CH), 128.2 (CH), 127.9 (CH), 122.2 (q, *J*<sub>C-F</sub> = 280.5 Hz) (Cq), 99.2 (q, *J*<sub>C-F</sub> = 33.0 Hz) (CH), 96.1 (Cq), 26.6 (CH<sub>3</sub>). <sup>19</sup>F NMR (376 MHz, CDCl<sub>3</sub>) δ -80.18 (d, *J* = 5.3 Hz); HRMS(ESI): *m/z* calcd for chemical formula: C<sub>16</sub>H<sub>14</sub>F<sub>3</sub>N<sub>2</sub>O<sub>2</sub>S [M + H]<sup>+</sup> 355.0723; found 355.0723.

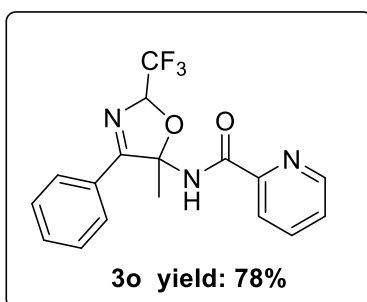

*N*-(5-Methyl-4-phenyl-2-(trifluoromethyl)-2,5-dihydrooxazol-5-yl) picolinamide (**3o**). Purified by column chromatography (EA/PE, 1:5). White solid (136 mg, 78%), m.p.: 137–139 °C; <sup>1</sup>H NMR (400 MHz, acetone-*d*<sub>6</sub>) δ 8.68 (d, *J* = 4.8 Hz, 1H), 8.15 – 8.13 (m, 2H), 8.01 – 7.97 (m, 2H), 7.65 – 7.62 (m, 1H), 7.55 (t, *J* = 7.42 Hz, 1H), 7.47 (t, *J* = 7.6 Hz, 2H), 6.32 (q, *J* = 5.2 Hz, 1H), 2.00 (s, 3H); <sup>13</sup>C NMR (150 MHz, acetone-*d*<sub>6</sub>) δ 170.9 (Cq), 164.2 (Cq), 149.1 (Cq), 148.6 (CH), 137.8 (Cq), 131.9 (CH), 129.4 (CH), 128.8 (CH), 128.2 (CH), 127.1 (CH), 122.4 (q, *J*<sub>C-F</sub> = 266.7 Hz) (Cq), 122.1 (CH), 98.8 (q, *J*<sub>C-F</sub> = 33.0 Hz) (CH), 96.1 (Cq), 25.7; <sup>19</sup>F NMR (376 MHz, acetone-*d*<sub>6</sub>) δ -68.14 (d, *J* = 3.8 Hz); HRMS (ESI): *m/z* calcd for chemical formula: C<sub>17</sub>H<sub>15</sub>F<sub>3</sub>N<sub>3</sub>O<sub>2</sub> [M + H]<sup>+</sup> 350.1111; found 350.1111.

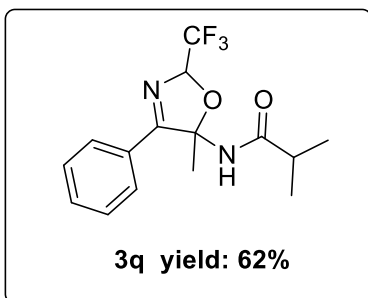

*N*-(5-Methyl-4-phenyl-2-(trifluoromethyl)-2,5-dihydrooxazol-5-yl) isobutyramide (**3q**). Purified by column chromatography (EA/PE, 1:5). White solid (97 mg, 62%), m.p.: 200–202 °C; <sup>1</sup>H NMR (400 MHz, CDCl<sub>3</sub>) δ 7.96 (d, *J* = 7.6 Hz, 2H), 7.50 (t, *J* = 7.2 Hz, 1H), 7.42 (t, *J* = 7.6 Hz, 2H), 6.30 (s, 1H), 6.18 (q, *J* = 4.8 Hz, 1H), 2.38 (p, *J* = 6.8 Hz, 1H), 1.76 (s, 3H), 1.13 (d, *J* = 6.8 Hz, 3H), 1.09 (d, *J* = 6.8 Hz, 3H); <sup>13</sup>C NMR (150 MHz, CDCl<sub>3</sub>) δ 176.7 (Cq), 170.4 (Cq), 131.8 (Cq), 129.4 (CH), 128.6 (CH), 128.1 (CH), 122.3 (q, *J*<sub>C-F</sub> = 280.5 Hz) (Cq), 99.0 (q, *J*<sub>C-F</sub> = 32.0 Hz) (CH), 95.6 (Cq), 33.6 (CH), 26.5 (CH<sub>3</sub>), 19.3 (CH<sub>3</sub>), 18.9 (CH<sub>3</sub>); <sup>19</sup>F NMR (376 MHz, CDCl<sub>3</sub>) δ -80.23 (d, *J* = 4.9 Hz); HRMS(ESI): *m/z* calcd for chemical formula: C<sub>15</sub>H<sub>18</sub>F<sub>3</sub>N<sub>2</sub>O<sub>2</sub> [M + H]<sup>+</sup> 315.1315; found 315.1315.

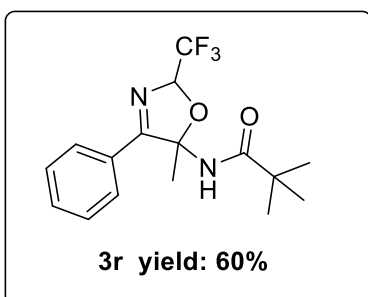

*N*-(5-Methyl-4-phenyl-2-(trifluoromethyl)-2,5-dihydrooxazol-5-yl) pivalamide (**3r**). Purified by column chromatography (EA/PE, 1:5). White solid (98 mg, 60%), m.p.: 196–198 °C; <sup>1</sup>H NMR (400 MHz, CDCl<sub>3</sub>) δ 7.95 (d, *J* = 7.2 Hz, 2H), 7.49 (t, *J* = 7.2 Hz, 1H), 7.41 (t, *J* = 7.6 Hz, 2H), 6.40 (s, 1H), 6.19 (q, *J* = 5.2 Hz, 1H), 1.78 (s, 3H), 1.18 (s, 9H). <sup>13</sup>C NMR (150 MHz, CDCl<sub>3</sub>) δ 178.1 (Cq), 171.3 (Cq), 131.8 (Cq), 129.4 (CH), 128.6 (CH), 128.0 (CH), 122.1 (q, *J*<sub>C-F</sub> = 247.5 Hz) (Cq), 99.0 (q, *J*<sub>C-F</sub> = 33.0 Hz) (CH), 95.6 (Cq), 38.6 (Cq), 27.2 (CH<sub>3</sub>), 26.6 (CH<sub>3</sub>); <sup>19</sup>F NMR (376 MHz, CDCl<sub>3</sub>) δ -84.95 (d, *J* = 5.3 Hz); HRMS(ESI): *m/z* calcd for chemical formula: C<sub>16</sub>H<sub>20</sub>F<sub>3</sub>N<sub>2</sub>O<sub>2</sub> [M + H]<sup>+</sup> 329.1471; found 329.1471.

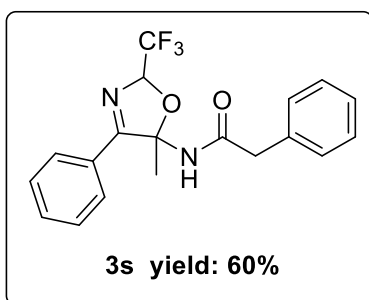

*N*-(5-Methyl-4-phenyl-2-(trifluoromethyl)-2,5-dihydrooxazol-5-yl)-2-phenylacetamide (**3s**). Purified by column chromatography (EA/PE, 1:5). White solid (109 mg, 60%), m.p.: 180–182 °C;  $^1\text{H}$  NMR (400 MHz,  $\text{CDCl}_3$ )  $\delta$  7.83 (d,  $J = 8.0$  Hz, 2H), 7.49 (t,  $J = 8.0$  Hz, 1H), 7.41 – 7.34 (m, 5H), 7.21 (d,  $J = 4.0$  Hz, 2H), 6.21 – 6.17 (m, 2H), 3.55 (s, 2H), 1.62 (s, 3H);  $^{13}\text{C}$  NMR (150 MHz,  $\text{CDCl}_3$ )  $\delta$  170.6 (Cq), 170.1 (Cq), 133.9 (Cq), 131.9 (Cq), 129.3 (CH), 129.1 (CH), 128.7 (CH), 128.6 (CH), 128.1 (CH), 127.8 (CH), 122.2 (q,  $J_{\text{C-F}} = 280.5$  Hz) (Cq), 99.1 (q,  $J_{\text{C-F}} = 33.0$  Hz) (CH), 95.5 (Cq), 44.0 ( $\text{CH}_2$ ), 26.2 ( $\text{CH}_3$ );  $^{19}\text{F}$  NMR (376 MHz,  $\text{CDCl}_3$ )  $\delta$  -79.84 (d,  $J = 4.9$  Hz); HRMS(ESI):  $m/z$  calcd for chemical formula:  $\text{C}_{19}\text{H}_{17}\text{F}_3\text{N}_2\text{NaO}_2$  [ $\text{M} + \text{Na}$ ] $^+$  385.1134; found 385.1133.

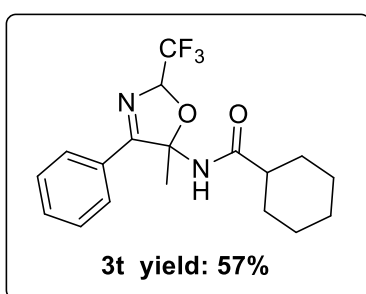

*N*-(5-Methyl-4-phenyl-2-(trifluoromethyl)-2,5-dihydrooxazol-5-yl) cyclohexanecarboxamide (**3t**). Purified by column chromatography (EA/PE, 1:5). White solid (101 mg, 57%), m.p.: 206–208 °C;  $^1\text{H}$  NMR (400 MHz,  $\text{CDCl}_3$ )  $\delta$  7.95 (d,  $J = 8.4$  Hz, 2H), 7.48 (t,  $J = 8.4$  Hz, 1H), 7.41 (t,  $J = 8.0$  Hz, 2H), 6.54 (s, 1H), 6.17 (q,  $J = 4.8$  Hz, 1H), 2.10 (t,  $J = 11.6$  Hz, 1H), 1.79 – 1.63 (m, 8H), 1.45 – 1.15 (m, 5H);  $^{13}\text{C}$  NMR (150 MHz,  $\text{CDCl}_3$ )  $\delta$  176.0 (Cq), 170.6 (Cq), 131.8 (Cq), 129.4 (CH), 128.6 (CH), 128.1 (CH), 122.3 (q,  $J_{\text{C-F}} = 280.5$  Hz), 99.0 (q,  $J_{\text{C-F}} = 33.0$  Hz) (CH), 95.6 (Cq), 45.2 (CH), 29.4 ( $\text{CH}_2$ ), 28.9 ( $\text{CH}_2$ ), 26.4 ( $\text{CH}_2$ ), 25.5 ( $\text{CH}_3$ );  $^{19}\text{F}$  NMR (376 MHz,  $\text{CDCl}_3$ )  $\delta$  -80.19 (d,  $J = 7.5$  Hz); HRMS(ESI):  $m/z$  calcd for chemical formula:  $\text{C}_{18}\text{H}_{22}\text{F}_3\text{N}_2\text{O}_2$  [ $\text{M} + \text{H}$ ] $^+$  355.1628; found 355.1627.

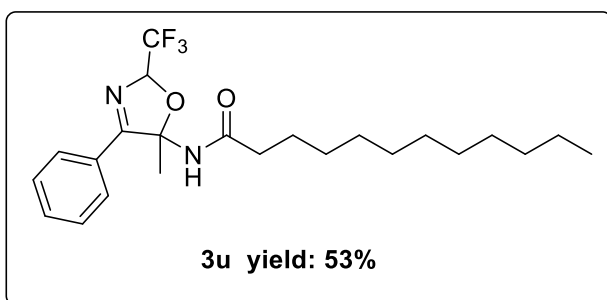

*N*-(5-Methyl-4-phenyl-2-(trifluoromethyl)-2,5-dihydrooxazol-5-yl) dodecanamide (**3u**). Purified by column chromatography (EA/PE, 1:5). White solid (106 mg, 53%), m.p.: 120–122 °C; <sup>1</sup>H NMR (400 MHz, CDCl<sub>3</sub>) δ 7.97 (d, *J* = 7.2 Hz, 2H), 7.50 (t, *J* = 7.6 Hz, 1H), 7.41 (t, *J* = 7.6 Hz, 2H), 6.45 (s, 1H), 6.17 (q, *J* = 5.2 Hz, 1H), 2.17 (td, *J* = 7.6, 3.2 Hz, 2H), 1.73 (s, 3H), 1.24–1.21 (m, 18H), 0.88 (t, *J* = 6.8 Hz, 3H); <sup>13</sup>C NMR (150 MHz, CDCl<sub>3</sub>) δ 173.3 (Cq), 170.5 (Cq), 131.9 (Cq), 129.3 (CH), 128.6 (CH), 128.1 (CH), 123.0 (q, *J*<sub>C-F</sub> = 280.2 Hz) (Cq), 98.9 (q, *J*<sub>C-F</sub> = 32.9 Hz) (CH), 95.7 (Cq), 36.0 (CH<sub>2</sub>), 31.9 (CH<sub>2</sub>), 29.6 (CH<sub>2</sub>), 29.5 (CH<sub>2</sub>), 29.4 (CH<sub>2</sub>), 29.3 (CH<sub>2</sub>), 29.3 (CH<sub>2</sub>), 29.1 (CH<sub>2</sub>), 26.4 (CH<sub>2</sub>), 25.1 (CH<sub>2</sub>), 22.6 (CH<sub>3</sub>), 14.1 (CH<sub>3</sub>); <sup>19</sup>F NMR (376 MHz, CDCl<sub>3</sub>) δ -80.23 (d, *J* = 4.9 Hz); HRMS (ESI): *m/z* calcd for chemical formula: C<sub>23</sub>H<sub>33</sub>F<sub>3</sub>N<sub>2</sub>NaO<sub>2</sub> [M + Na]<sup>+</sup> 449.2386; found 449.2387.

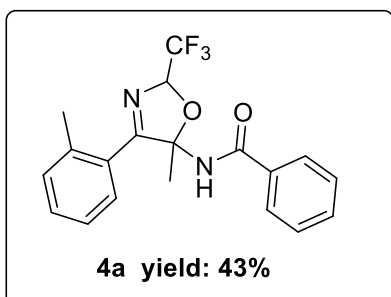

*N*-(5-Methyl-4-(*o*-tolyl)-2-(trifluoromethyl)-2,5-dihydrooxazol-5-yl) benzamide (**4a**). Purified by column chromatography (EA/PE, 1:5). White solid (78 mg, 43%), m.p.: 274–276 °C; <sup>1</sup>H NMR (400 MHz, CDCl<sub>3</sub>) δ 7.77 (d, *J* = 8.4 Hz, 2H), 7.55 (t, *J* = 7.6 Hz, 1H), 7.45 (t, *J* = 7.6 Hz, 2H), 7.38 (d, *J* = 8.0 Hz, 1H), 7.31–7.30 (m, 2H), 7.13 (t, *J* = 5.6 Hz, 1H), 6.93 (s, 1H), 6.35 (q, *J* = 5.2 Hz, 1H), 2.47 (s, 3H), 1.66 (s, 3H); <sup>13</sup>C NMR (150 MHz, CDCl<sub>3</sub>) δ 170.9 (Cq), 167.4 (Cq), 138.8 (Cq), 133.3 (Cq), 132.4 (Cq), 131.5 (CH), 130.2 (CH), 129.5 (CH), 128.8 (CH), 127.1 (CH), 127.1 (CH), 125.6 (CH), 122.4 (q, *J*<sub>C-F</sub> = 279.0 Hz) (Cq), 99.7 (q, *J*<sub>C-F</sub> = 32.9 Hz) (CH), 97.5 (Cq), 25.4 (CH<sub>3</sub>), 20.8 (CH<sub>3</sub>); <sup>19</sup>F NMR (376 MHz, CDCl<sub>3</sub>) δ -79.83 (d, *J* = 5.3 Hz); HRMS (ESI): *m/z* calcd for chemical formula: C<sub>19</sub>H<sub>18</sub>F<sub>3</sub>N<sub>2</sub>O<sub>2</sub> [M + H]<sup>+</sup> 363.1315; found 363.1312.



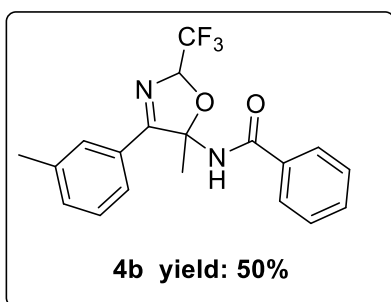

*N*-(5-Methyl-4-(*m*-tolyl)-2-(trifluoromethyl)-2,5-dihydrooxazol-5-yl) benzamide (**4b**). Purified by column chromatography (EA/PE, 1:5). White solid (91 mg, 50%), m.p.: 200–202 °C; <sup>1</sup>H NMR (400 MHz, CDCl<sub>3</sub>) δ 7.90 (s, 1H), 7.74–7.72 (m, 3H), 7.52 (t, *J* = 7.6 Hz, 1H), 7.41 (t, *J* = 8.0 Hz, 2H), 7.30 – 7.24 (m, 2H), 7.11 (s, 1H), 6.27 (q, *J* = 5.2 Hz, 1H), 2.35 (s, 3H), 1.84 (s, 3H); <sup>13</sup>C NMR (150 MHz, CDCl<sub>3</sub>) δ 170.8 (Cq), 167.2 (Cq), 138.7 (Cq), 133.2 (Cq), 132.8 (Cq), 132.3 (CH), 129.2 (CH), 129.0 (CH), 128.8 (CH), 128.5 (CH), 127.1 (CH), 124.9 (CH), 122.4 (q, *J*<sub>C-F</sub> = 280.1 Hz) (Cq), 99.1 (q, *J*<sub>C-F</sub> = 32.6 Hz) (CH), 96.1 (Cq), 26.6 (CH<sub>3</sub>), 21.3 (CH<sub>3</sub>); <sup>19</sup>F NMR (376 MHz, CDCl<sub>3</sub>) δ -82.71 (d, *J* = 4.9 Hz); HRMS (ESI): *m/z* calcd for chemical formula: C<sub>19</sub>H<sub>18</sub>F<sub>3</sub>N<sub>2</sub>O<sub>2</sub> [M + H]<sup>+</sup> 363.1315; found 363.1313.

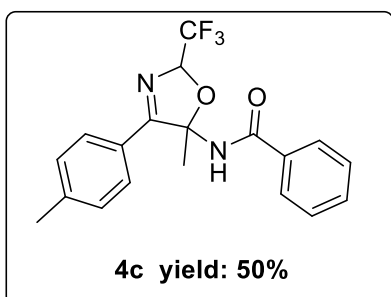

*N*-(5-Methyl-4-(*p*-tolyl)-2-(trifluoromethyl)-2,5-dihydrooxazol-5-yl) benzamide (**4c**). Purified by column chromatography (EA/PE, 1:5). White solid (101 mg, 56%), m.p.: 201–203 °C; <sup>1</sup>H NMR (400 MHz, CDCl<sub>3</sub>) δ 7.92 (d, *J* = 8.0 Hz, 2H), 7.73 (d, *J* = 7.2 Hz, 2H), 7.53 (t, *J* = 7.6 Hz, 1H), 7.42 (t, *J* = 8.0 Hz, 2H), 7.20 (d, *J* = 8.0 Hz, 2H), 7.03 (s, 1H), 6.26 (q, *J* = 5.2 Hz, 1H), 2.36 (s, 3H), 1.86 (s, 3H); <sup>13</sup>C NMR (150 MHz, CDCl<sub>3</sub>) δ 170.4 (Cq), 167.0 (Cq), 142.5 (Cq), 133.2 (Cq), 132.3 (Cq), 129.5 (CH), 128.8 (CH), 128.1 (CH), 127.1 (CH), 126.5 (CH), 123.4 (q, *J*<sub>C-F</sub> = 279.0 Hz) (Cq), 99.2 (q, *J*<sub>C-F</sub> = 33.0 Hz) (CH), 96.0 (Cq), 26.7 (CH<sub>3</sub>), 21.5 (CH<sub>3</sub>); <sup>19</sup>F NMR (376 MHz, CDCl<sub>3</sub>) δ -80.20 (d, *J* = 4.9 Hz); HRMS (ESI): *m/z* calcd for chemical formula: C<sub>19</sub>H<sub>17</sub>F<sub>3</sub>N<sub>2</sub>NaO<sub>2</sub> [M + Na]<sup>+</sup> 385.1134; found 385.1134.

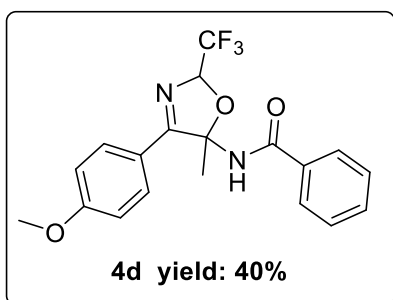

*N*-(4-(4-Methoxyphenyl)-5-methyl-2-(trifluoromethyl)-2,5-dihydrooxazol-5-yl) benzamide (**4d**). Purified by column chromatography (EA/PE, 1:5). White solid (76 mg, 40%), m.p.: 207–209 °C; <sup>1</sup>H NMR (400 MHz, CDCl<sub>3</sub>) δ 7.99 (d, *J* = 9.2 Hz, 2H), 7.73 (d, *J* = 7.2 Hz, 2H), 7.52 (t, *J* = 7.6 Hz, 1H), 7.41 (t, *J* = 7.6 Hz, 2H), 7.14 (s, 1H), 6.89 (d, *J* = 9.2 Hz, 2H), 6.23 (q, *J* = 5.2 Hz, 1H), 3.81 (s, 3H), 1.85 (s, 3H); <sup>13</sup>C NMR (150 MHz, CDCl<sub>3</sub>) δ 169.8 (Cq), 167.0 (Cq), 162.5 (Cq), 133.2 (Cq), 132.3 (Cq), 130.0 (CH), 128.7 (CH), 127.1 (CH), 122.4 (q, *J*<sub>C-F</sub> = 280.5 Hz) (Cq), 121.8 (CH), 114.1 (CH), 99.1 (q, *J*<sub>C-F</sub> = 32.9 Hz) (CH), 95.9 (Cq), 55.4 (CH<sub>3</sub>), 26.8 (CH<sub>3</sub>); <sup>19</sup>F NMR (376 MHz, CDCl<sub>3</sub>) δ -79.85 (d, *J* = 5.3 Hz); HRMS(ESI): *m/z* calcd for chemical formula: C<sub>19</sub>H<sub>18</sub>F<sub>3</sub>N<sub>2</sub>O<sub>3</sub> [M + H]<sup>+</sup> 379.1264; found 379.1266.

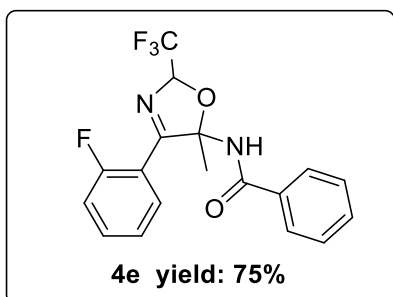

*N*-(4-(2-Fluorophenyl)-5-methyl-2-(trifluoromethyl)-2,5-dihydrooxazol-5-yl) benzamide (**4e**). Purified by column chromatography (EA/PE, 1:5). White solid (248 mg, 75%), m.p.: 168–170 °C; <sup>1</sup>H NMR (400 MHz, CDCl<sub>3</sub>) δ 8.00 (td, *J* = 7.6, 1.4 Hz, 1H), 7.73 (d, *J* = 6.8 Hz, 2H), 7.54 – 7.41 (m, 4H), 7.20 (t, *J* = 8.0, 1H), 7.10 (dd, *J* = 11.6, 8.4 Hz, 1H), 6.97 (s, 1H), 6.35 (q, *J* = 4.8 Hz, 1H), 1.81 (d, *J* = 1.6 Hz, 3H); <sup>13</sup>C NMR (150 MHz, CDCl<sub>3</sub>) δ 168.5 (Cq), 167.1 (Cq), 160.5 (d, *J*<sub>C-F</sub> = 252.2 Hz) (Cq), 133.4 (Cq), 133.4 (d, *J*<sub>C-F</sub> = 9.0 Hz) (CH), 132.2 (CH), 131.7 (d, *J*<sub>C-F</sub> = 3.0 Hz) (CH), 128.7 (CH), 127.0 (CH), 124.7 (d, *J*<sub>C-F</sub> = 3.0 Hz) (Cq), 122.2 (q, *J*<sub>C-F</sub> = 280.5 Hz) (Cq), 116.6 (d, *J*<sub>C-F</sub> = 23.0 Hz) (CH), 99.5 (q, *J*<sub>C-F</sub> = 33.0 Hz) (CH), 96.9 (Cq), 25.2 (d, *J*<sub>C-F</sub> = 6.0 Hz) (CH<sub>3</sub>); <sup>19</sup>F NMR (376 MHz, CDCl<sub>3</sub>) δ -79.73 (d, *J* = 5.3 Hz), -107.51 – -107.57 (m); HRMS(ESI): *m/z* calcd for chemical formula: C<sub>18</sub>H<sub>14</sub>F<sub>4</sub>N<sub>2</sub>NaO<sub>2</sub> [M + Na]<sup>+</sup> 389.0884; found 389.0884.

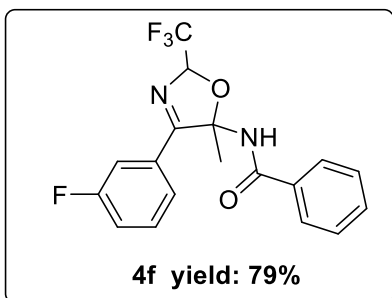

*N*-(4-(3-Fluorophenyl)-5-methyl-2-(trifluoromethyl)-2,5-dihydrooxazol-5-yl) benzamide (**4f**). Purified by column chromatography (EA/PE, 1:5). White solid (145 mg, 79%), m.p.: 176–178 °C; <sup>1</sup>H NMR (400 MHz, CDCl<sub>3</sub>) δ 7.81 – 7.73 (m, 4H), 7.56 (t, *J* = 7.2 Hz, 1H), 7.46 (t, *J* = 7.6 Hz, 2H), 7.41 – 7.36 (m, 1H), 7.19 (td, *J* = 8.4, 2.4 Hz, 1H), 6.97 (s, 1H), 6.28 (q, *J* = 4.8 Hz, 1H), 1.87 (s, 3H). <sup>13</sup>C NMR (150 MHz, CDCl<sub>3</sub>) δ 169.7 (Cq), 167.3 (Cq), 162.7 (d, *J*<sub>C-F</sub> = 246.0 Hz) (Cq), 132.9 (Cq), 132.5 (Cq), 131.4 (d, *J*<sub>C-F</sub> = 7.5 Hz) (CH), 130.5 (d, *J*<sub>C-F</sub> = 7.5 Hz) (CH), 128.8 (CH), 127.1 (CH), 123.8 (CH), 122.5 (q, *J*<sub>C-F</sub> = 381.0 Hz) (Cq), 119.0 (d, *J*<sub>C-F</sub> = 21.0 Hz) (CH), 115.2 (d, *J*<sub>C-F</sub> = 22.5 Hz) (CH), 99.2 (q, *J*<sub>C-F</sub> = 31.5.0 Hz) (CH), 94.5 (Cq), 26.5 (CH<sub>3</sub>); <sup>19</sup>F NMR (376 MHz, CDCl<sub>3</sub>) δ -80.10 (d, *J* = 4.9 Hz), -111.92 – -111.98 (m); HRMS(ESI): *m/z* calcd for chemical formula: C<sub>18</sub>H<sub>14</sub>F<sub>4</sub>N<sub>2</sub>NaO<sub>2</sub> [M + H]<sup>+</sup> 389.0884; found 389.0884.

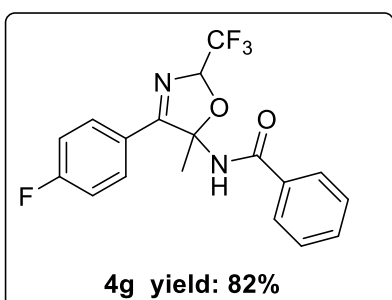

*N*-(4-(4-Fluorophenyl)-5-methyl-2-(trifluoromethyl)-2,5-dihydrooxazol-5-yl) benzamide (**4g**). Purified by column chromatography (EA/PE, 1:5). White solid (150 mg, 82%), m.p.: 296–198 °C; <sup>1</sup>H NMR (400 MHz, CDCl<sub>3</sub>) δ 8.05 –8.01 (m, 2H), 7.72 (d, *J* = 6.8 Hz, 2H), 7.53 (t, *J* = 7.6 Hz, 1H), 7.41 (t, *J* = 8.0 Hz, 2H), 7.19 (s, 1H), 7.07 (t, *J* = 8.8 Hz, 2H), 6.23 (q, *J* = 4.8 Hz, 1H), 1.82 (s, 3H); <sup>13</sup>C NMR (150 MHz, CDCl<sub>3</sub>) δ 169.6 (Cq), 167.3 (Cq), 164.9 (d, *J*<sub>C-F</sub> = 253.5 Hz) (Cq), 133.0 (Cq), 132.5 (Cq), 130.5 (d, *J*<sub>C-F</sub> = 9.0 Hz) (CH), 128.8 (CH), 127.1 (CH), 125.6 (d, *J*<sub>C-F</sub> = 3.0 Hz) (CH), 122.3 (q, *J*<sub>C-F</sub> = 280.5 Hz) (Cq), 116.0 (d, *J*<sub>C-F</sub> = 21.0 Hz) (CH), 98.6 (q, *J*<sub>C-F</sub> = 31.5 Hz) (CH), 96.0 (Cq), 27.3 (CH<sub>3</sub>); <sup>19</sup>F NMR (376 MHz, CDCl<sub>3</sub>) δ -79.76 (d, *J* = 4.9 Hz), -106.66 –106.74 (m); HRMS (ESI): *m/z* calcd for chemical formula: C<sub>18</sub>H<sub>15</sub>F<sub>4</sub>N<sub>2</sub>O<sub>2</sub> [M + H]<sup>+</sup> 367.1064; found 367.1065.

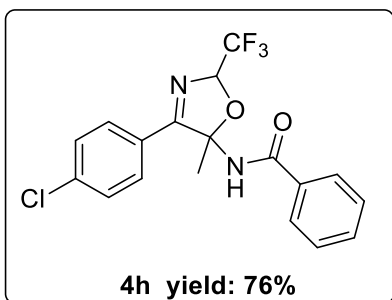

*N*-(4-(4-Chlorophenyl)-5-methyl-2-(trifluoromethyl)-2,5-dihydrooxazol-5-yl) benzamide (**4h**). Purified by column chromatography (EA/PE, 1:5). White solid (145 mg, 76%), m.p.: 192–194 °C;  $^1\text{H}$  NMR (400 MHz,  $\text{CDCl}_3$ )  $\delta$  8.06 – 8.01 (m, 1H), 7.87 (dd,  $J = 8.0$  Hz, 1.2 Hz, 1H), 7.79 – 7.71 (m, 2H), 7.54 (t,  $J = 8.0$  Hz, 1H), 7.47 – 7.42 (m, 3H), 7.34 (t,  $J = 8.0$  Hz, 1H), 7.07 (s, 1H), 6.27 (q,  $J = 4.8$  Hz, 1H), 1.85 (s, 3H);  $^{13}\text{C}$  NMR (150 MHz,  $\text{CDCl}_3$ )  $\delta$  169.6 (Cq), 167.3 (Cq), 134.9 (Cq), 132.5 (Cq), 132.0 (Cq), 130.1 (CH), 128.8 (CH), 128.3 (CH), 127.1 (CH), 126.0 (CH), 122.2 (q,  $J_{\text{C-F}} = 280.5$  Hz) (Cq), 99.2 (q,  $J_{\text{C-F}} = 33.0$  Hz) (CH), 94.6 (Cq), 26.5 ( $\text{CH}_3$ );  $^{19}\text{F}$  NMR (376 MHz,  $\text{CDCl}_3$ )  $\delta$  -80.05 (d,  $J = 5.3$  Hz); HRMS (ESI):  $m/z$  calcd for chemical formula:  $\text{C}_{18}\text{H}_{13}\text{ClF}_3\text{N}_2\text{O}_2$   $[\text{M} - \text{H}]^+$  381.0623; found 381.0624.

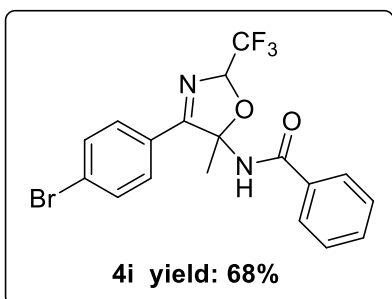

*N*-(4-(4-Bromophenyl)-5-methyl-2-(trifluoromethyl)-2,5-dihydrooxazol-5-yl) benzamide (**4i**). Purified by column chromatography (EA/PE, 1:5). White solid (145 mg, 68%), m.p.: 215–217 °C;  $^1\text{H}$  NMR (400 MHz,  $\text{CDCl}_3$ )  $\delta$  7.89 (d,  $J = 8.8$  Hz, 2H), 7.74 (d,  $J = 7.2$  Hz, 2H), 7.56–7.53 (m, 3H), 7.45 (t,  $J = 8.0$  Hz, 2H), 6.97 (s, 1H), 6.25 (q,  $J = 5.2$  Hz, 1H), 1.86 (s, 3H);  $^{13}\text{C}$  NMR (150 MHz,  $\text{CDCl}_3$ )  $\delta$  169.8 (Cq), 167.1 (Cq), 132.9 (Cq), 132.5 (Cq), 132.1 (CH), 129.6 (CH), 128.8 (CH), 128.2 (CH), 127.1 (CH), 126.8 (Cq), 122.2 (q,  $J_{\text{C-F}} = 280.5$  Hz) (Cq), 99.2 (q,  $J_{\text{C-F}} = 33.0$  Hz) (CH), 95.9 (Cq), 26.6 ( $\text{CH}_3$ );  $^{19}\text{F}$  NMR (376 MHz,  $\text{CDCl}_3$ )  $\delta$  -79.72 (d,  $J = 4.9$  Hz); HRMS (ESI):  $m/z$  calcd for chemical formula:  $\text{C}_{18}\text{H}_{15}\text{BrF}_3\text{N}_2\text{O}_2$   $[\text{M} + \text{H}]^+$  427.0264; found 427.0264.

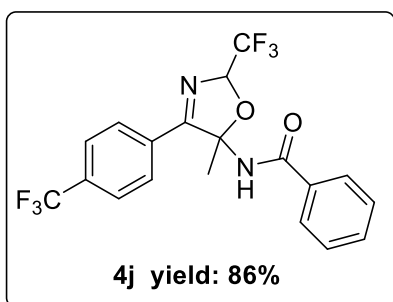

*N*-(5-Methyl-2-(trifluoromethyl)-4-(4-(trifluoromethyl) phenyl)-2,5-dihydrooxazol-5-yl) benzamide (**4j**). Purified by column chromatography (EA/PE, 1:5). White solid (179 mg, 86%), m.p.: 178–180 °C;  $^1\text{H}$  NMR (400 MHz,  $\text{CDCl}_3$ )  $\delta$  8.14 (d,  $J = 8.0$  Hz, 2H), 7.75 (d,  $J = 8.0$  Hz, 2H), 7.67 (d,  $J = 8.4$  Hz, 2H), 7.56 (t,  $J = 7.2$  Hz, 1H), 7.46 (d,  $J = 8.0$  Hz, 2H), 7.03 (s, 1H), 6.30 (q,  $J = 5.2$  Hz, 1H), 1.87 (s, 3H);  $^{13}\text{C}$  NMR (150 MHz,  $\text{CDCl}_3$ )  $\delta$  169.7 (Cq), 167.3 (Cq), 133.5 (q,  $J_{\text{C-F}} = 33.0$  Hz) (Cq), 132.8 (Cq), 132.7 (Cq), 128.9 (CH), 128.5 (CH), 127.1 (CH), 126.3 (CH), 125.8 (q,  $J_{\text{C-F}} = 3.0$  Hz) (CH), 123.6 (q,  $J_{\text{C-F}} = 270.0$  Hz) (CH), 122.1 (q,  $J_{\text{C-F}} = 280.5$  Hz) (Cq), 99.3 (q,  $J_{\text{C-F}} = 33.0$  Hz) (CH), 96.0 (Cq), 26.5 ( $\text{CH}_3$ );  $^{19}\text{F}$  NMR (376 MHz,  $\text{CDCl}_3$ )  $\delta$  -63.62 (s), -80.03 (d,  $J = 4.9$  Hz); HRMS (ESI):  $m/z$  calcd for chemical formula:  $\text{C}_{19}\text{H}_{15}\text{F}_6\text{N}_2\text{O}_2$  [ $\text{M} + \text{H}$ ] $^+$  417.1032; found 407.1033.

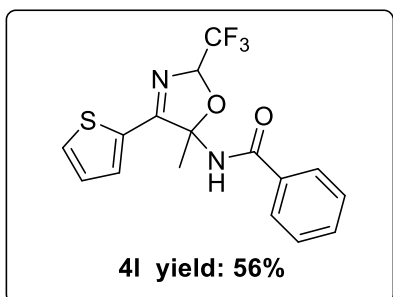

*N*-(5-Methyl-4-(thiophen-2-yl)-2-(trifluoromethyl)-2,5-dihydrooxazol-5-yl) benzamide (**4l**). Purified by column chromatography (EA/PE, 1:5). White solid (99 mg, 56%), m.p.: 186–188 °C;  $^1\text{H}$  NMR (400 MHz,  $\text{CDCl}_3$ )  $\delta$  7.75 – 7.69 (m, 3H), 7.55–7.52 (m, 2H), 7.43 (t,  $J = 8.0$  Hz, 2H), 7.07 (dd,  $J = 4.8, 3.6$  Hz, 1H), 6.98 (s, 1H), 6.25 (q,  $J = 4.8$  Hz, 1H), 1.93 (s, 3H);  $^{13}\text{C}$  NMR (150 MHz,  $\text{CDCl}_3$ )  $\delta$  166.9 (Cq), 165.7 (Cq), 133.1 (Cq), 132.4 (Cq), 132.4 (CH), 131.3 (CH), 130.5 (CH), 128.8 (CH), 127.9 (CH), 127.1 (Cq), 122.2 (q,  $J_{\text{C-F}} = 280.5$  Hz) (Cq), 99.5 (q,  $J_{\text{C-F}} = 33.0$  Hz) (CH), 96.0 (Cq), 26.9 ( $\text{CH}_3$ );  $^{19}\text{F}$  NMR (376 MHz,  $\text{CDCl}_3$ )  $\delta$  -79.67 (d,  $J = 5.3$  Hz); HRMS (ESI):  $m/z$  calcd for chemical formula:  $\text{C}_{16}\text{H}_{12}\text{F}_3\text{N}_2\text{O}_2\text{S}$  [ $\text{M} - \text{H}$ ] $^+$  353.0577; found 353.0577.

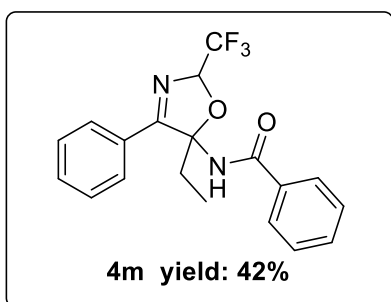

*N*-(5-Ethyl-4-phenyl-2-(trifluoromethyl)-2,5-dihydrooxazol-5-yl) benzamide (**4m**). Purified by column chromatography (EA/PE, 1:5). White solid (76 mg, 42%), m.p.: 160–162 °C; <sup>1</sup>H NMR (400 MHz, CDCl<sub>3</sub>) δ 7.96 (d, *J* = 7.2 Hz, 2H), 7.73 (d, *J* = 7.2 Hz, 2H), 7.54 – 7.37 (m, 6H), 7.06 (s, 1H), 6.35 (q, *J* = 5.2 Hz, 1H), 2.25 – 2.04 (m, 2H), 0.98 (t, *J* = 7.2 Hz, 3H); <sup>13</sup>C NMR (150 MHz, CDCl<sub>3</sub>) δ 169.7 (Cq), 167.3 (Cq), 133.5 (Cq), 132.5 (Cq), 132.0 (CH), 130.0 (CH), 128.9 (CH), 128.9 (CH), 128.1 (CH), 127.2 (CH), 112.5 (q, *J*<sub>C-F</sub> = 279.8 Hz) (Cq), 99.6 (q, *J*<sub>C-F</sub> = 32.9 Hz) (CH), 98.6 (Cq), 31.8 (CH<sub>2</sub>), 7.1 (CH<sub>3</sub>); <sup>19</sup>F NMR (376 MHz, CDCl<sub>3</sub>) δ -79.05 (d, *J* = 5.3 Hz); HRMS (ESI): *m/z* calcd for chemical formula: C<sub>19</sub>H<sub>18</sub>F<sub>3</sub>N<sub>2</sub>O<sub>2</sub> [M + H]<sup>+</sup> 363.1315; found 363.1314.

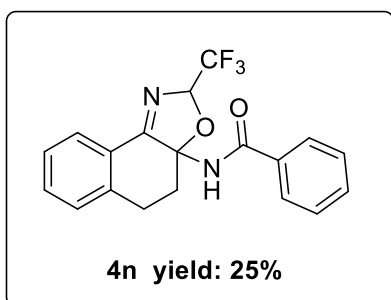

*N*-(2-(Trifluoromethyl)-4,5-dihydronaphtho[1,2-d]oxazol-3a(2H)yl) benzamide (**4n**). Purified by column chromatography (EA/PE, 1:8). Brown solid (45 mg, 25%), m.p.: 180–182 °C; <sup>1</sup>H NMR (400 MHz, CDCl<sub>3</sub>) δ 8.07 (d, *J* = 7.6 Hz, 1H), 7.61 (d, *J* = 7.6 Hz, 2H), 7.48–7.42 (m, 2H), 7.35–7.29 (m, 3H), 7.23 (d, *J* = 7.6 Hz, 1H), 6.93 (s, 1H), 6.37 (q, *J* = 5.2 Hz, 1H), 3.27 – 3.10 (m, 2H), 2.71 (dd, *J* = 14.0, 4.4 Hz, 1H), 2.26 (td, *J* = 13.2, 6.4 Hz, 1H); <sup>13</sup>C NMR (150 MHz, CDCl<sub>3</sub>) δ 170.0 (Cq), 167.5 (Cq), 138.6 (Cq), 133.2 (Cq), 132.3 (Cq), 132.2 (CH), 128.6 (CH), 128.6 (CH), 127.8 (CH), 127.3 (CH), 127.1 (CH), 127.0 (CH), 122.4 (q, *J*<sub>C-F</sub> = 279.0 Hz) (Cq), 101.2 (q, *J*<sub>C-F</sub> = 33.0 Hz) (CH), 93.7 (Cq), 35.1 (CH<sub>2</sub>), 27.3 (CH<sub>2</sub>); <sup>19</sup>F NMR (376 MHz, CDCl<sub>3</sub>) δ -79.83 (d, *J* = 4.9 Hz); HRMS (ESI): *m/z* calcd for chemical formula: C<sub>19</sub>H<sub>16</sub>F<sub>3</sub>N<sub>2</sub>O<sub>2</sub> [M + H]<sup>+</sup> 361.1158; found 361.1157.

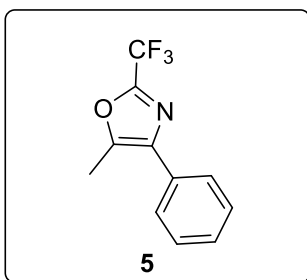

5-Methyl-4-phenyl-2-(trifluoromethyl) oxazole (**5**). Purified by column chromatography (EA/PE, 1:5). Colorless liquid (28 mg, 25%);  $^1\text{H}$  NMR (400 MHz,  $\text{CDCl}_3$ )  $\delta$  7.68 – 7.65 (m, 2H), 7.45 (t,  $J = 7.6$  Hz, 2H), 7.38 – 7.34 (m, 1H), 2.61 (s, 3H);  $^{13}\text{C}$  NMR (150 MHz,  $\text{CDCl}_3$ )  $\delta$  148.5 (q,  $J_{\text{C-F}} = 43.7$  Hz), 136.0 (Cq), 130.1 (Cq), 128.8 (Cq), 128.1 (CH), 126.9 (CH), 126.8 (Cq), 116.6 (q,  $J_{\text{C-F}} = 268.8$  Hz) (Cq), 11.9 (CH<sub>3</sub>);  $^{19}\text{F}$  NMR (376 MHz,  $\text{CDCl}_3$ )  $\delta$  -61.43; HRMS(ESI):  $m/z$  calcd for chemical formula:  $\text{C}_{11}\text{H}_9\text{F}_3\text{NO}$   $[\text{M} + \text{H}]^+$  228.0629; found 228.0630.

### 3. References and notes

1. (a) Sai, M., *t*-KOBu/DMSO Catalytic System for Isomerization of Allylic Alcohols to Ketones. *Eur. J. Org. Chem.* **2022**, 2022 (10), e202200052. (b) Nie, X.-k.; Chen, Y.; Zhang, S.-q.; Cui, X.; Tang, Z.; Li, G.-x., Chiral Primary Amine Catalyzed Enantioselective Tandem Reactions Based on Heyns Rearrangement: Synthesis of  $\alpha$ -Tertiary Amino Ketones. *Org. Lett.* **2022**, 24 (10), 2069-2074. (c) Liang, Y.-F.; Wu, K.; Song, S.; Li, X.; Huang, X.; Jiao, N., I<sub>2</sub>- or NBS-Catalyzed Highly Efficient  $\alpha$ -Hydroxylation of Ketones with Dimethyl Sulfoxide. *Org. Lett.* **2015**, 17, 876-879. (d) Matsuo, K.; Shindo, M., Cu (II)-Catalyzed Acylation by Thiol Esters Under Neutral Conditions: Tandem Acylation-Wittig Reaction Leading to a One-Pot Synthesis of Butenolides. *Org. Lett.* **2010**, 12, 5346-5349.
2. (a) Du, G.; Huang, D.; Wang, K.-H.; Chen, X.; Xu, Y.; Ma, J.; Su, Y.; Fu, Y.; Hu, Y., One-pot preparation of trifluoromethylated homoallylic *N*-acylhydrazines or  $\alpha$ -methylene- $\gamma$ -lactams from acylhydrazines, trifluoroacetaldehyde methyl hemiacetal, allyl bromide and tin. *Org. Biomol. Chem.* **2016**, 14, 1492-1500. (b) Młostoń, G.; Urbaniak, K.; Jacaszek, N.; Linden, A.; Heimgartner, H. J. H., Exploration of fluoral hydrazones derived from carbohydrazides for the synthesis of trifluoromethylated. *Heterocycles* **2014**, 88, 387-401.



#### 4. Single Crystal X-Ray Structure Determinations of Compounds 3a

Thermal ellipsoids are set at a 50% probability level. Crystal data have been deposited to CCDC, number 2156398.

##### Experimental

Single crystals of  $C_{18}H_{15}F_3N_2O_2$  Compounds **3a** were selected and placed. A suitable crystal was selected and placed on a ROD, Synergy Custom system, HyPix diffractometer. The crystal was kept at 300.51(10) K during data collection. Using Olex2<sup>[1]</sup>, the structure was solved with the olex2.solve<sup>[2]</sup> structure solution program using Charge Flipping and refined with the olex2.refine<sup>[3]</sup> refinement package using Gauss-Newton minimisation.

##### Crystal structure determination of Compounds 3a.

**Crystal Data** for  $C_{18}H_{15}F_3N_2O_2$  ( $M = 348.32$  g/mol): monoclinic, space group Cc (no. 9),  $a = 14.6254(2)$  Å,  $b = 14.0014(2)$  Å,  $c = 33.2503(4)$  Å,  $\beta = 97.3100(10)^\circ$ ,  $V = 6753.52(16)$  Å<sup>3</sup>,  $Z = 4$ ,  $T = 300.51(10)$  K,  $\mu$  (Cu K $\alpha$ ) = 0.966 mm<sup>-1</sup>,  $D_{calc} = 1.370$  g/cm<sup>3</sup>, 57519 reflections measured ( $5.36^\circ \leq 2\theta \leq 154.934^\circ$ ), 12797 unique ( $R_{int} = 0.0514$ ,  $R_{\sigma} = 0.0289$ ) which were used in all calculations. The final  $R_1$  was 0.0437 ( $I > 2\sigma(I)$ ) and  $wR_2$  was 0.1213 (all data).

##### Refinement model description

Number of restraints - 2, number of constraints - unknown.

Details:

1.a Ternary CH refined with riding coordinates:

C3(H3)

1. b Aromatic/amide H refined with riding coordinates:

N4(H4), C6(H6), C7(H7), C8(H8), C9(H9), C10(H10), C12(H12), C13(H13),

C14(H14), C15(H15), C16(H16)

1.c Idealised Me refined as rotating group:

C18(H18A, H18B, H18C)

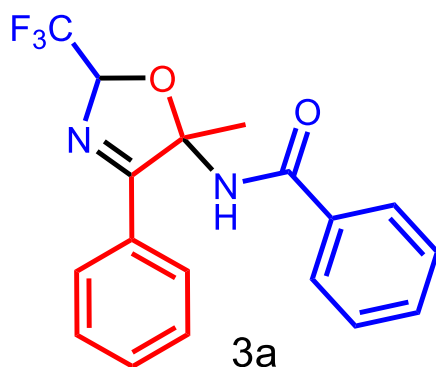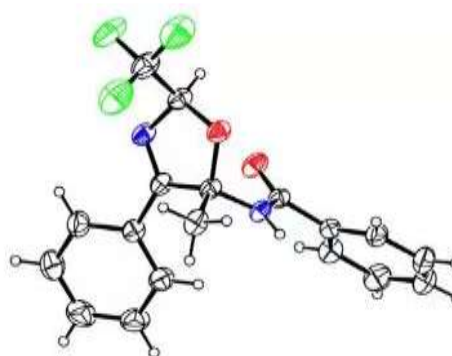

**Table S2 Crystallographic Data of Compound 3a**

|                                        |                                                                              |
|----------------------------------------|------------------------------------------------------------------------------|
| CCDC                                   | 2156398                                                                      |
| Empirical formula                      | C <sub>18</sub> H <sub>15</sub> F <sub>3</sub> N <sub>2</sub> O <sub>2</sub> |
| Formula weight                         | 348.32                                                                       |
| Temperature/K                          | 300.51(10)                                                                   |
| Crystal system                         | monoclinic                                                                   |
| Space group                            | Cc                                                                           |
| a/Å                                    | 14.6254(2)                                                                   |
| b/Å                                    | 14.0014(2)                                                                   |
| c/Å                                    | 33.2503(2)                                                                   |
| $\alpha$ /°                            | 90                                                                           |
| $\beta$ /°                             | 97.3100(10)                                                                  |
| $\gamma$ /°                            | 90                                                                           |
| Volume/Å <sup>3</sup>                  | 6753.52(16)                                                                  |
| Z                                      | 4                                                                            |
| $\rho_{\text{calc}}$ /cm <sup>3</sup>  | 1.370                                                                        |
| $\mu$ /mm <sup>-1</sup>                | 0.966                                                                        |
| F (000)                                | 2880.0                                                                       |
| Crystal size/mm <sup>3</sup>           | 0.14 × 0.12 × 0.11                                                           |
| Radiation                              | Cu K $\alpha$ ( $\lambda$ = 1.54184)                                         |
| 2 $\theta$ range for data collection/° | 5.362 to 154.934                                                             |
| Index ranges                           | -18 ≤ h ≤ 18, -17 ≤ k ≤ 17, -39 ≤ l ≤ 41                                     |
| Reflections collected                  | 57519                                                                        |
| Independent reflections                | 12797 [R <sub>int</sub> = 0.0514, R <sub>sigma</sub> = 0.0289]               |
| Data/restraints/parameters             | 12797/2/906                                                                  |

|                                                |                                  |
|------------------------------------------------|----------------------------------|
| Goodness-of-fit on $F^2$                       | 1.031                            |
| Final R indexes [ $I \geq 2\sigma(I)$ ]        | $R_1 = 0.0437$ , $wR_2 = 0.1181$ |
| Final R indexes [all data]                     | $R_1 = 0.0467$ , $wR_2 = 0.1213$ |
| Largest diff. peak/hole / $e \text{ \AA}^{-3}$ | 0.19/-0.17                       |

**Table S3 Fractional Atomic Coordinates ( $\times 10^4$ ) and Equivalent Isotropic Displacement Parameters ( $\text{\AA}^2 \times 10^3$ ) for Compound 3a.  $U_{eq}$  is defined as 1/3 of of the trace of the orthogonalised  $U_{ij}$  tensor.**

| Atom            | x           | y           | z           | $U(eq)$   |
|-----------------|-------------|-------------|-------------|-----------|
| F <sup>1</sup>  | -2471(2)    | -1880(2)    | -6633.8(12) | 104.7(10) |
| F <sup>2</sup>  | -1489.6(17) | -2995(2)    | -6472.0(11) | 98.4(10)  |
| F <sup>3</sup>  | -1723(2)    | -1926(3)    | -6040.5(12) | 114.3(13) |
| O <sup>1</sup>  | -3536.5(15) | -2505.7(17) | -6033.7(8)  | 52.5(5)   |
| O <sup>2</sup>  | -4375.1(17) | -4504.4(17) | -5850.7(8)  | 57.7(6)   |
| N <sup>3</sup>  | -3319.6(17) | -3644.9(18) | -6522.0(9)  | 49.2(6)   |
| N <sup>4</sup>  | -5035.5(17) | -3057.4(18) | -5970.5(8)  | 44.0(5)   |
| C <sup>1</sup>  | -4431(2)    | -2724(2)    | -6247.8(9)  | 43.6(6)   |
| C <sup>2</sup>  | -4182(2)    | -3484(2)    | -6550.1(9)  | 44.2(6)   |
| C <sup>3</sup>  | -2877(2)    | -3086(2)    | -6189.4(11) | 51.0(7)   |
| C <sup>4</sup>  | -4972.9(19) | -3926(2)    | -5793.1(9)  | 41.6(6)   |
| C <sup>5</sup>  | -5709(2)    | -4171(2)    | -5534.7(9)  | 44.1(6)   |
| C <sup>6</sup>  | -5972(3)    | -3530(3)    | -5251.2(11) | 56.1(8)   |
| C <sup>7</sup>  | -6612(3)    | -3806(4)    | -5002.6(13) | 74.3(12)  |
| C <sup>8</sup>  | -7010(3)    | -4685(4)    | -5043.2(13) | 74.2(12)  |
| C <sup>9</sup>  | -6786(3)    | -5305(3)    | -5336.7(14) | 70.5(10)  |
| C <sup>10</sup> | -6123(3)    | -5055(2)    | -5577.5(12) | 56.1(8)   |
| C <sup>11</sup> | -4837(2)    | -3961(2)    | -6858.0(10) | 46.4(6)   |
| C <sup>12</sup> | -4510(3)    | -4330(3)    | -7202.2(11) | 62.0(9)   |

| Atom            | x        | y        | z           | U(eq)    |
|-----------------|----------|----------|-------------|----------|
| C <sup>13</sup> | -5086(4) | -4836(4) | -7485.6(14) | 82.2(13) |
| C <sup>14</sup> | -6000(4) | -4985(4) | -7427.5(15) | 83.4(13) |
| C <sup>15</sup> | -6323(3) | -4618(3) | -7093.0(14) | 73.7(11) |
| C <sup>16</sup> | -5753(2) | -4107(3) | -6807.5(12) | 60.7(8)  |
| C <sup>17</sup> | -2144(3) | -2469(3) | -6337.5(15) | 69.9(10) |
| C <sup>18</sup> | -4843(3) | -1830(2) | -6456.1(11) | 55.8(8)  |

**Table S4 Anisotropic Displacement Parameters ( $\text{\AA}^2 \times 10^3$ ) for Compound 3a. The Anisotropic displacement factor exponent takes the form:  $-2 \pi^2 [h^2 a^{*2} U_{11} + 2hka^* b^* U_{12} + \dots]$ .**

| Atom            | U <sub>11</sub> | U <sub>22</sub> | U <sub>33</sub> | U <sub>23</sub> | U <sub>13</sub> | U <sub>12</sub> |
|-----------------|-----------------|-----------------|-----------------|-----------------|-----------------|-----------------|
| F <sup>1</sup>  | 101(2)          | 82.3(18)        | 138(3)          | 17.5(18)        | 44(2)           | -14.5(16)       |
| F <sup>2</sup>  | 53.7(13)        | 106(2)          | 143(3)          | -32.7(18)       | 41.9(15)        | -8.8(13)        |
| F <sup>3</sup>  | 82.4(18)        | 118(2)          | 147(3)          | -60(2)          | 32.7(19)        | -52.4(18)       |
| O <sup>1</sup>  | 41.8(11)        | 53.3(12)        | 63.3(14)        | -17.9(10)       | 10.0(10)        | -2.6(10)        |
| O <sup>2</sup>  | 50.1(12)        | 48.3(12)        | 77.7(15)        | 4.4(10)         | 20.4(11)        | 15.7(10)        |
| N <sup>3</sup>  | 40.9(13)        | 43.8(13)        | 64.6(16)        | -9.7(11)        | 13.1(11)        | 0.8(10)         |
| N <sup>4</sup>  | 40.6(12)        | 40.5(12)        | 53.1(13)        | -1.9(10)        | 14.2(10)        | 7.7(10)         |
| C <sup>1</sup>  | 38.5(14)        | 39.4(14)        | 54.1(16)        | -6.5(12)        | 10.7(12)        | 0.4(11)         |
| C <sup>2</sup>  | 44.7(15)        | 36.9(14)        | 52.9(16)        | -1.6(11)        | 13.3(12)        | 1.4(11)         |
| C <sup>3</sup>  | 39.5(15)        | 46.6(16)        | 68(2)           | -9.6(14)        | 10.6(14)        | 1.1(13)         |
| C <sup>4</sup>  | 37.3(13)        | 39.2(14)        | 48.4(15)        | -3.5(11)        | 6.3(11)         | 2.6(11)         |
| C <sup>5</sup>  | 38.8(14)        | 49.4(16)        | 44.1(15)        | -0.6(12)        | 5.6(12)         | 5.4(12)         |
| C <sup>6</sup>  | 51.3(17)        | 65(2)           | 53.6(18)        | -13.2(15)       | 11.4(14)        | -4.7(16)        |
| C <sup>7</sup>  | 64(2)           | 102(3)          | 61(2)           | -18(2)          | 22.6(18)        | -5(2)           |
| C <sup>8</sup>  | 60(2)           | 102(3)          | 65(2)           | 8(2)            | 22.9(19)        | -10(2)          |
| C <sup>9</sup>  | 66(2)           | 66(2)           | 81(3)           | 6(2)            | 17(2)           | -14.6(19)       |
| C <sup>10</sup> | 57.6(19)        | 48.1(17)        | 65(2)           | -2.1(14)        | 14.9(16)        | -2.3(15)        |
| C <sup>11</sup> | 47.5(15)        | 39.3(15)        | 52.9(16)        | -2.9(11)        | 7.8(13)         | 2.8(12)         |

| Atom            | U <sub>11</sub> | U <sub>22</sub> | U <sub>33</sub> | U <sub>23</sub> | U <sub>13</sub> | U <sub>12</sub> |
|-----------------|-----------------|-----------------|-----------------|-----------------|-----------------|-----------------|
| C <sup>12</sup> | 64(2)           | 68(2)           | 55.3(19)        | -9.8(16)        | 14.3(16)        | -2.6(17)        |
| C <sup>13</sup> | 89(3)           | 95(3)           | 63(2)           | -31(2)          | 11(2)           | -2(2)           |
| C <sup>14</sup> | 78(3)           | 89(3)           | 78(3)           | -29(2)          | -9(2)           | -9(2)           |
| C <sup>15</sup> | 51(2)           | 81(3)           | 86(3)           | -21(2)          | -1.1(19)        | -6.1(19)        |
| C <sup>16</sup> | 50.2(17)        | 65(2)           | 67(2)           | -18.6(16)       | 6.6(15)         | -1.4(16)        |
| C <sup>17</sup> | 54(2)           | 64(2)           | 95(3)           | -17(2)          | 22(2)           | -11.3(18)       |
| C <sup>18</sup> | 62(2)           | 41.7(16)        | 67(2)           | 2.0(14)         | 19.1(16)        | 5.3(14)         |

**Table S5 Bond Lengths for Compound 3a.**

| Atom           | Atom            | Length/Å |
|----------------|-----------------|----------|
| F <sup>1</sup> | C <sup>17</sup> | 1.326(6) |
| F <sup>2</sup> | C <sup>17</sup> | 1.329(5) |
| F <sup>3</sup> | C <sup>17</sup> | 1.334(5) |
| O <sup>1</sup> | C <sup>1</sup>  | 1.440(4) |
| O <sup>1</sup> | C <sup>3</sup>  | 1.409(4) |
| O <sup>2</sup> | C <sup>4</sup>  | 1.224(4) |
| N <sup>3</sup> | C <sup>2</sup>  | 1.273(4) |
| N <sup>3</sup> | C <sup>3</sup>  | 1.440(4) |
| N <sup>4</sup> | C <sup>1</sup>  | 1.434(4) |
| N <sup>4</sup> | C <sup>4</sup>  | 1.350(4) |
| C <sup>1</sup> | C <sup>2</sup>  | 1.538(4) |
| C <sup>1</sup> | C <sup>18</sup> | 1.517(4) |
| C <sup>2</sup> | C <sup>11</sup> | 1.471(4) |

| Atom            | Atom            | Length/Å |
|-----------------|-----------------|----------|
| C <sup>3</sup>  | C <sup>17</sup> | 1.507(5) |
| C <sup>4</sup>  | C <sup>5</sup>  | 1.500(4) |
| C <sup>5</sup>  | C <sup>6</sup>  | 1.391(5) |
| C <sup>5</sup>  | C <sup>10</sup> | 1.377(5) |
| C <sup>6</sup>  | C <sup>7</sup>  | 1.381(6) |
| C <sup>7</sup>  | C <sup>8</sup>  | 1.361(7) |
| C <sup>8</sup>  | C <sup>9</sup>  | 1.376(7) |
| C <sup>9</sup>  | C <sup>10</sup> | 1.379(6) |
| C <sup>11</sup> | C <sup>12</sup> | 1.394(5) |
| C <sup>11</sup> | C <sup>16</sup> | 1.386(5) |
| C <sup>12</sup> | C <sup>13</sup> | 1.377(6) |
| C <sup>13</sup> | C <sup>14</sup> | 1.391(7) |
| C <sup>14</sup> | C <sup>15</sup> | 1.363(7) |

**Table S6 Bond Angles for Compound 3a.**

| Atom           | Atom           | Atom           | Angle/°  |
|----------------|----------------|----------------|----------|
| C <sup>3</sup> | O <sup>1</sup> | C <sup>1</sup> | 108.5(2) |
| C <sup>2</sup> | N <sup>3</sup> | C <sup>3</sup> | 107.7(2) |

| Atom            | Atom           | Atom           | Angle/°  |
|-----------------|----------------|----------------|----------|
| C <sup>10</sup> | C <sup>5</sup> | C <sup>6</sup> | 119.6(3) |
| C <sup>7</sup>  | C <sup>6</sup> | C <sup>5</sup> | 119.4(4) |

| Atom            | Atom           | Atom            | Angle/°  |
|-----------------|----------------|-----------------|----------|
| C <sup>4</sup>  | N <sup>4</sup> | C <sup>1</sup>  | 124.1(2) |
| O <sup>1</sup>  | C <sup>1</sup> | C <sup>2</sup>  | 101.2(2) |
| O <sup>1</sup>  | C <sup>1</sup> | C <sup>18</sup> | 109.5(3) |
| N <sup>4</sup>  | C <sup>1</sup> | O <sup>1</sup>  | 110.3(3) |
| N <sup>4</sup>  | C <sup>1</sup> | C <sup>2</sup>  | 114.3(2) |
| N <sup>4</sup>  | C <sup>1</sup> | C <sup>18</sup> | 108.7(2) |
| C <sup>18</sup> | C <sup>1</sup> | C <sup>2</sup>  | 112.6(3) |
| N <sup>3</sup>  | C <sup>2</sup> | C <sup>1</sup>  | 112.9(3) |
| N <sup>3</sup>  | C <sup>2</sup> | C <sup>11</sup> | 121.5(3) |
| C <sup>11</sup> | C <sup>2</sup> | C <sup>1</sup>  | 125.6(3) |
| O <sup>1</sup>  | C <sup>3</sup> | N <sup>3</sup>  | 109.5(3) |
| O <sup>1</sup>  | C <sup>3</sup> | C <sup>17</sup> | 109.8(3) |
| N <sup>3</sup>  | C <sup>3</sup> | C <sup>17</sup> | 109.2(3) |
| O <sup>2</sup>  | C <sup>4</sup> | N <sup>4</sup>  | 122.5(3) |
| O <sup>2</sup>  | C <sup>4</sup> | C <sup>5</sup>  | 121.2(3) |
| N <sup>4</sup>  | C <sup>4</sup> | C <sup>5</sup>  | 116.3(2) |
| C <sup>6</sup>  | C <sup>5</sup> | C <sup>4</sup>  | 121.4(3) |
| C <sup>10</sup> | C <sup>5</sup> | C <sup>4</sup>  | 119.0(3) |

| Atom            | Atom            | Atom            | Angle/°  |
|-----------------|-----------------|-----------------|----------|
| C <sup>8</sup>  | C <sup>7</sup>  | C <sup>6</sup>  | 120.6(4) |
| C <sup>7</sup>  | C <sup>8</sup>  | C <sup>9</sup>  | 120.2(4) |
| C <sup>8</sup>  | C <sup>9</sup>  | C <sup>10</sup> | 120.0(4) |
| C <sup>5</sup>  | C <sup>10</sup> | C <sup>9</sup>  | 120.0(4) |
| C <sup>12</sup> | C <sup>11</sup> | C <sup>2</sup>  | 118.6(3) |
| C <sup>16</sup> | C <sup>11</sup> | C <sup>2</sup>  | 122.4(3) |
| C <sup>16</sup> | C <sup>11</sup> | C <sup>12</sup> | 118.8(3) |
| C <sup>13</sup> | C <sup>12</sup> | C <sup>11</sup> | 120.6(4) |
| C <sup>12</sup> | C <sup>13</sup> | C <sup>14</sup> | 119.8(4) |
| C <sup>15</sup> | C <sup>14</sup> | C <sup>13</sup> | 119.8(4) |
| C <sup>14</sup> | C <sup>15</sup> | C <sup>16</sup> | 120.9(4) |
| C <sup>15</sup> | C <sup>16</sup> | C <sup>11</sup> | 120.1(4) |
| F <sup>1</sup>  | C <sup>17</sup> | F <sup>2</sup>  | 107.6(4) |
| F <sup>1</sup>  | C <sup>17</sup> | F <sup>3</sup>  | 106.5(4) |
| F <sup>1</sup>  | C <sup>17</sup> | C <sup>3</sup>  | 113.2(3) |
| F <sup>2</sup>  | C <sup>17</sup> | F <sup>3</sup>  | 106.3(4) |
| F <sup>2</sup>  | C <sup>17</sup> | C <sup>3</sup>  | 111.4(3) |
| F <sup>3</sup>  | C <sup>17</sup> | C <sup>3</sup>  | 111.4(4) |

**Table S7 Torsion Angles for Compound 3a.**

| A              | B              | C              | D               | Angle/°   |
|----------------|----------------|----------------|-----------------|-----------|
| O <sup>1</sup> | C <sup>1</sup> | C <sup>2</sup> | N <sup>3</sup>  | -1.6(3)   |
| O <sup>1</sup> | C <sup>1</sup> | C <sup>2</sup> | C <sup>11</sup> | -178.8(3) |

| A              | B               | C               | D               | Angle/°   |
|----------------|-----------------|-----------------|-----------------|-----------|
| C <sup>2</sup> | C <sup>11</sup> | C <sup>16</sup> | C <sup>15</sup> | -175.5(4) |
| C <sup>3</sup> | O <sup>1</sup>  | C <sup>1</sup>  | N <sup>4</sup>  | 120.1(3)  |

| A              | B               | C               | D               | Angle/°   |
|----------------|-----------------|-----------------|-----------------|-----------|
| O <sup>1</sup> | C <sup>3</sup>  | C <sup>17</sup> | F <sup>1</sup>  | -61.1(4)  |
| O <sup>1</sup> | C <sup>3</sup>  | C <sup>17</sup> | F <sup>2</sup>  | 177.5(3)  |
| O <sup>1</sup> | C <sup>3</sup>  | C <sup>17</sup> | F <sup>3</sup>  | 58.9(5)   |
| O <sup>2</sup> | C <sup>4</sup>  | C <sup>5</sup>  | C <sup>6</sup>  | 136.3(4)  |
| O <sup>2</sup> | C <sup>4</sup>  | C <sup>5</sup>  | C <sup>10</sup> | -43.0(4)  |
| N <sup>3</sup> | C <sup>2</sup>  | C <sup>11</sup> | C <sup>12</sup> | -21.8(5)  |
| N <sup>3</sup> | C <sup>2</sup>  | C <sup>11</sup> | C <sup>16</sup> | 154.3(3)  |
| N <sup>3</sup> | C <sup>3</sup>  | C <sup>17</sup> | F <sup>1</sup>  | 59.0(4)   |
| N <sup>3</sup> | C <sup>3</sup>  | C <sup>17</sup> | F <sup>2</sup>  | -62.4(5)  |
| N <sup>3</sup> | C <sup>3</sup>  | C <sup>17</sup> | F <sup>3</sup>  | 179.0(3)  |
| N <sup>4</sup> | C <sup>1</sup>  | C <sup>2</sup>  | N <sup>3</sup>  | -120.1(3) |
| N <sup>4</sup> | C <sup>1</sup>  | C <sup>2</sup>  | C <sup>11</sup> | 62.7(4)   |
| N <sup>4</sup> | C <sup>4</sup>  | C <sup>5</sup>  | C <sup>6</sup>  | -46.6(4)  |
| N <sup>4</sup> | C <sup>4</sup>  | C <sup>5</sup>  | C <sup>10</sup> | 134.1(3)  |
| C <sup>1</sup> | O <sup>1</sup>  | C <sup>3</sup>  | N <sup>3</sup>  | 3.5(4)    |
| C <sup>1</sup> | O <sup>1</sup>  | C <sup>3</sup>  | C <sup>17</sup> | 123.4(3)  |
| C <sup>1</sup> | N <sup>4</sup>  | C <sup>4</sup>  | O <sup>2</sup>  | 1.2(5)    |
| C <sup>1</sup> | N <sup>4</sup>  | C <sup>4</sup>  | C <sup>5</sup>  | -175.8(3) |
| C <sup>1</sup> | C <sup>2</sup>  | C <sup>11</sup> | C <sup>12</sup> | 155.1(3)  |
| C <sup>1</sup> | C <sup>2</sup>  | C <sup>11</sup> | C <sup>16</sup> | -28.7(5)  |
| C <sup>2</sup> | N <sup>3</sup>  | C <sup>3</sup>  | O <sup>1</sup>  | -4.6(4)   |
| C <sup>2</sup> | N <sup>3</sup>  | C <sup>3</sup>  | C <sup>17</sup> | -124.9(3) |
| C <sup>2</sup> | C <sup>11</sup> | C <sup>12</sup> | C <sup>13</sup> | 175.8(4)  |

| A               | B               | C               | D               | Angle/°   |
|-----------------|-----------------|-----------------|-----------------|-----------|
| C <sup>3</sup>  | O <sup>1</sup>  | C <sup>1</sup>  | C <sup>2</sup>  | -1.3(3)   |
| C <sup>3</sup>  | O <sup>1</sup>  | C <sup>1</sup>  | C <sup>18</sup> | -120.4(3) |
| C <sup>3</sup>  | N <sup>3</sup>  | C <sup>2</sup>  | C <sup>1</sup>  | 3.7(4)    |
| C <sup>3</sup>  | N <sup>3</sup>  | C <sup>2</sup>  | C <sup>11</sup> | -179.0(3) |
| C <sup>4</sup>  | N <sup>4</sup>  | C <sup>1</sup>  | O <sup>1</sup>  | -73.1(3)  |
| C <sup>4</sup>  | N <sup>4</sup>  | C <sup>1</sup>  | C <sup>2</sup>  | 40.2(4)   |
| C <sup>4</sup>  | N <sup>4</sup>  | C <sup>1</sup>  | C <sup>18</sup> | 166.9(3)  |
| C <sup>4</sup>  | C <sup>5</sup>  | C <sup>6</sup>  | C <sup>7</sup>  | -176.1(4) |
| C <sup>4</sup>  | C <sup>5</sup>  | C <sup>10</sup> | C <sup>9</sup>  | 178.5(4)  |
| C <sup>5</sup>  | C <sup>6</sup>  | C <sup>7</sup>  | C <sup>8</sup>  | -2.4(7)   |
| C <sup>6</sup>  | C <sup>5</sup>  | C <sup>10</sup> | C <sup>9</sup>  | -0.8(6)   |
| C <sup>6</sup>  | C <sup>7</sup>  | C <sup>8</sup>  | C <sup>9</sup>  | -0.8(7)   |
| C <sup>7</sup>  | C <sup>8</sup>  | C <sup>9</sup>  | C <sup>10</sup> | 3.2(7)    |
| C <sup>8</sup>  | C <sup>9</sup>  | C <sup>10</sup> | C <sup>5</sup>  | -2.4(7)   |
| C <sup>10</sup> | C <sup>5</sup>  | C <sup>6</sup>  | C <sup>7</sup>  | 3.2(6)    |
| C <sup>11</sup> | C <sup>12</sup> | C <sup>13</sup> | C <sup>14</sup> | -0.2(7)   |
| C <sup>12</sup> | C <sup>11</sup> | C <sup>16</sup> | C <sup>15</sup> | 0.7(6)    |
| C <sup>12</sup> | C <sup>13</sup> | C <sup>14</sup> | C <sup>15</sup> | 0.8(8)    |
| C <sup>13</sup> | C <sup>14</sup> | C <sup>15</sup> | C <sup>16</sup> | -0.6(8)   |
| C <sup>14</sup> | C <sup>15</sup> | C <sup>16</sup> | C <sup>11</sup> | -0.1(7)   |
| C <sup>16</sup> | C <sup>11</sup> | C <sup>12</sup> | C <sup>13</sup> | -0.5(6)   |
| C <sup>18</sup> | C <sup>1</sup>  | C <sup>2</sup>  | N <sup>3</sup>  | 115.2(3)  |
| C <sup>18</sup> | C <sup>1</sup>  | C <sup>2</sup>  | C <sup>11</sup> | -62.0(4)  |

**Table S8 Hydrogen Atom Coordinates ( $\text{\AA} \times 104$ ) and Isotropic Displacement Parameters ( $\text{\AA}^2 \times 103$ ) for Compound 3a.**

| Atom           | <i>x</i> | <i>y</i> | <i>z</i> | U(eq) |
|----------------|----------|----------|----------|-------|
| H <sup>4</sup> | -5465.08 | -2680    | -5913.77 | 53    |

| <b>Atom</b>      | <b><i>x</i></b> | <b><i>y</i></b> | <b><i>z</i></b> | <b>U(eq)</b> |
|------------------|-----------------|-----------------|-----------------|--------------|
| H <sup>3</sup>   | -2592.78        | -3512.78        | -5975.72        | 61           |
| H <sup>6</sup>   | -5718.9         | -2919.55        | -5229.31        | 67           |
| H <sup>7</sup>   | -6772.52        | -3388.2         | -4805.84        | 89           |
| H <sup>8</sup>   | -7434.77        | -4867.81        | -4872.03        | 89           |
| H <sup>9</sup>   | -7081.85        | -5892.11        | -5372.63        | 85           |
| H <sup>10</sup>  | -5955.66        | -5483.45        | -5768.91        | 67           |
| H <sup>12</sup>  | -3898.55        | -4233.17        | -7240.78        | 74           |
| H <sup>13</sup>  | -4863.46        | -5078.19        | -7714.95        | 99           |
| H <sup>14</sup>  | -6389.76        | -5332.96        | -7616.27        | 100          |
| H <sup>15</sup>  | -6936.69        | -4713.48        | -7056.43        | 88           |
| H <sup>16</sup>  | -5983.42        | -3860.43        | -6581.01        | 73           |
| H <sup>18A</sup> | -5430.16        | -1980.39        | -6605.74        | 84           |
| H <sup>18B</sup> | -4436.88        | -1592.13        | -6638.27        | 84           |
| H <sup>18C</sup> | -4921.01        | -1353.1         | -6256.04        | 84           |



## 5. Copies of NMR Spectra

$^1\text{H}$  NMR,  $^{13}\text{C}$  NMR,  $^{19}\text{F}$  NMR, HRMS spectra for compounds **3**, **4** and **5**

NMR copies of compound **3a**

$^1\text{H}$  NMR (400 MHz) spectrum of **3a** in  $\text{CDCl}_3$

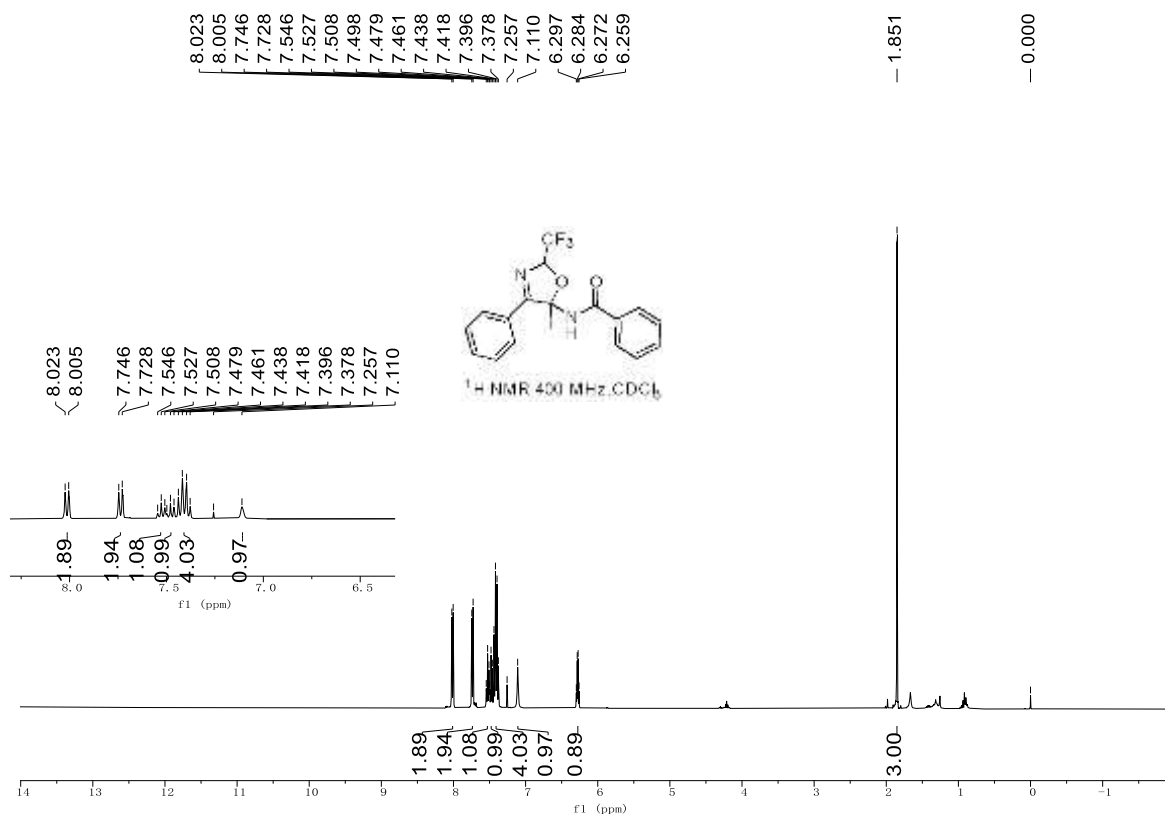

$^{13}\text{C}$  NMR (150 MHz) spectrum of **3a** in  $\text{CDCl}_3$

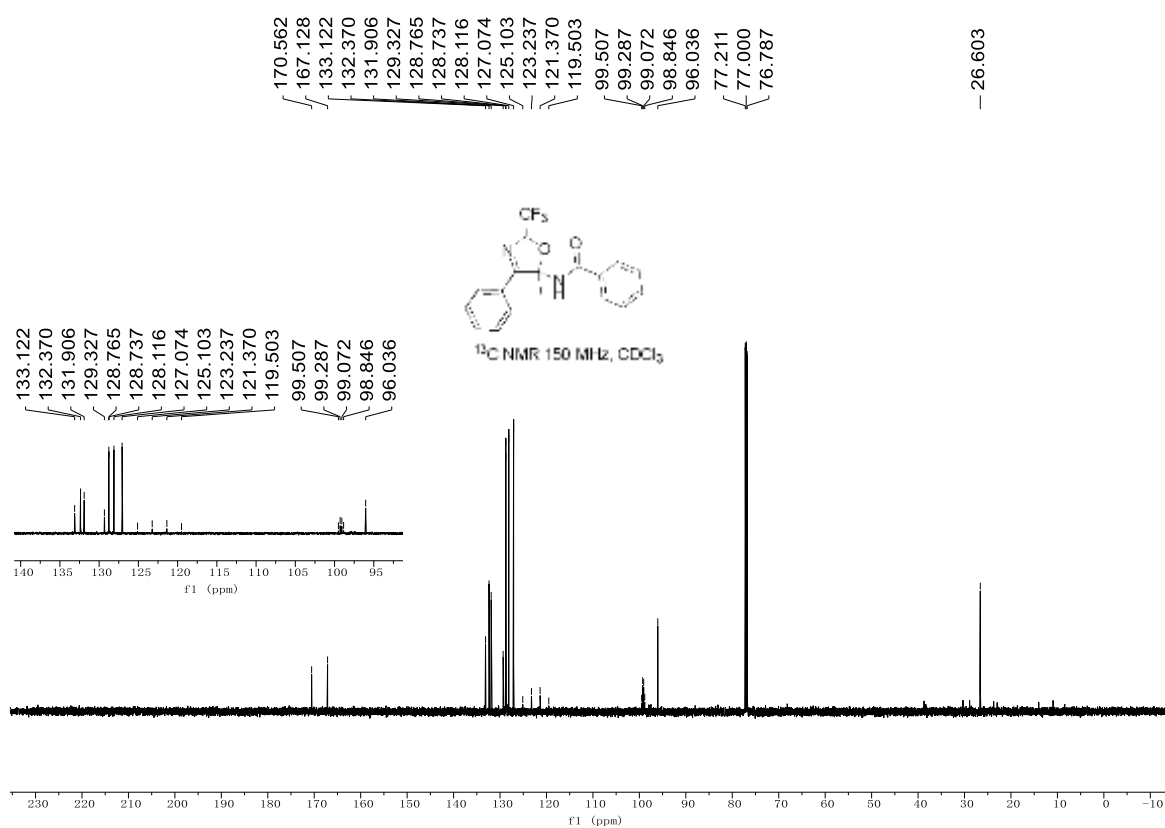

$^{19}\text{F}$  NMR (376 MHz) spectrum of **3a** in  $\text{CDCl}_3$

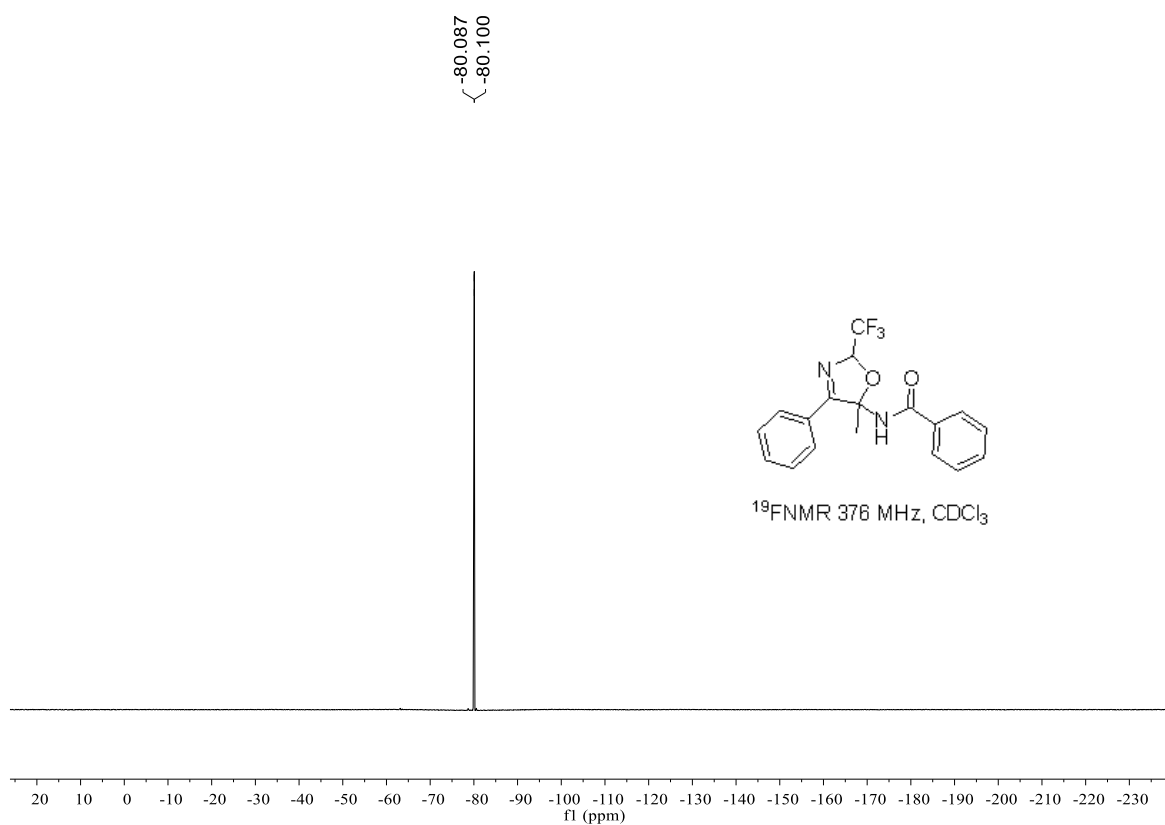

# HRMS(ESI) copy of compound **3a**:

D:\data\WJJ-LVYUYU-41

09/22/21 09:48:30

NJJ-LVYUYU-41#57-163 RT: 0.25382-0.72626 AV: 107 NL: 2.14E8  
 F: FTMS + p ESI Full lock ms [50.0000-750.0000]

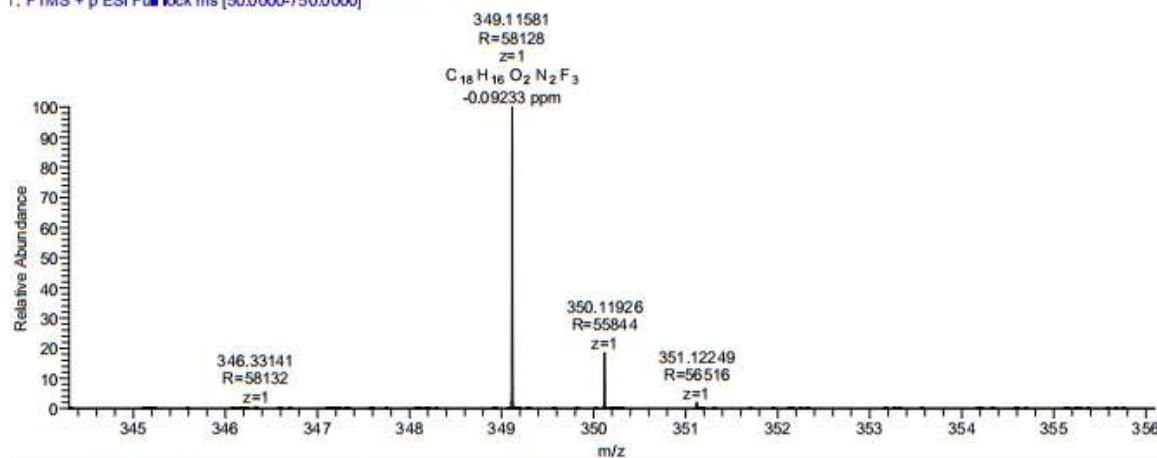

NJJ-LVYUYU-41#57-163 RT: 0.25382-0.72626 AV: 107  
 F: FTMS + p ESI Full lock ms [50.0000-750.0000]

m/z = 344.30123-356.09748

| m/z       | Intensity   | Relative | Resolution | Charge | Delta (ppm) | Composition                                                                  |
|-----------|-------------|----------|------------|--------|-------------|------------------------------------------------------------------------------|
| 346.33141 | 1155394.4   | 0.54     | 58132.50   | 1.00   |             |                                                                              |
| 349.11581 | 215207664.0 | 100.00   | 58128.26   | 1.00   | -0.09       | C <sub>18</sub> H <sub>16</sub> O <sub>2</sub> N <sub>2</sub> F <sub>3</sub> |
| 349.18266 | 832666.8    | 0.39     | 56313.22   | 0.00   |             |                                                                              |
| 350.11926 | 40867144.0  | 18.99    | 55843.50   | 1.00   |             |                                                                              |
| 351.12249 | 4123196.0   | 1.92     | 56516.02   | 1.00   |             |                                                                              |

# NMR copies of compound **3b**

## <sup>1</sup>H NMR (400 MHz) spectrum of **3b** in CDCl<sub>3</sub>

8.060, 8.042, 7.539, 7.520, 7.502, 7.456, 7.436, 7.418, 7.355, 7.336, 7.316, 7.258, 7.217, 7.199, 6.761, 6.277, 6.264, 6.252, -2.273, -1.808, -0.000

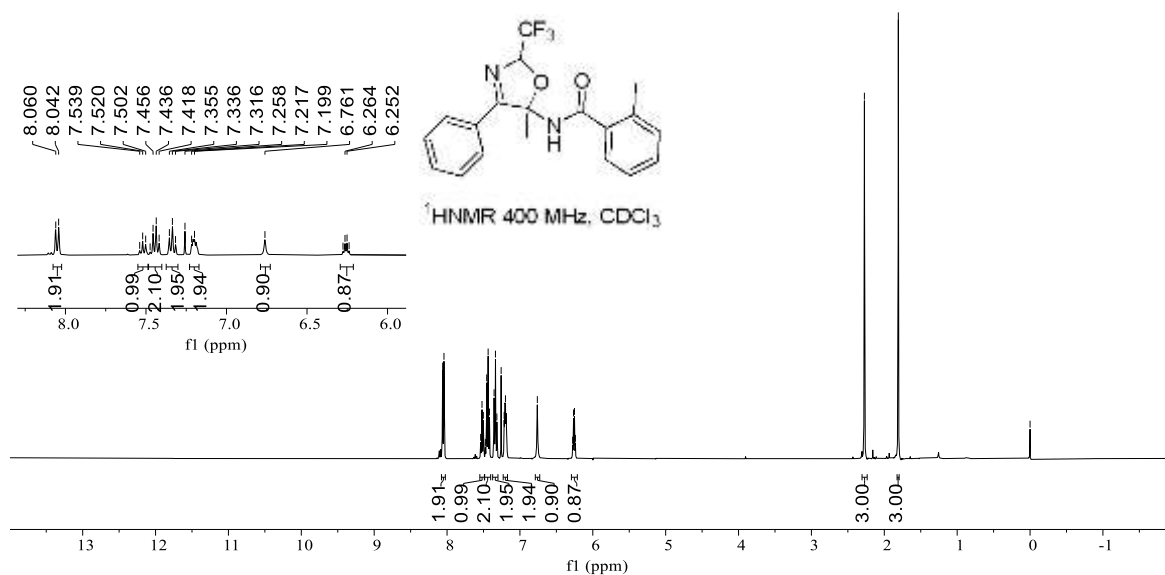

$^{13}\text{C}$  NMR (150 MHz) spectrum of **3b** in  $\text{CDCl}_3$

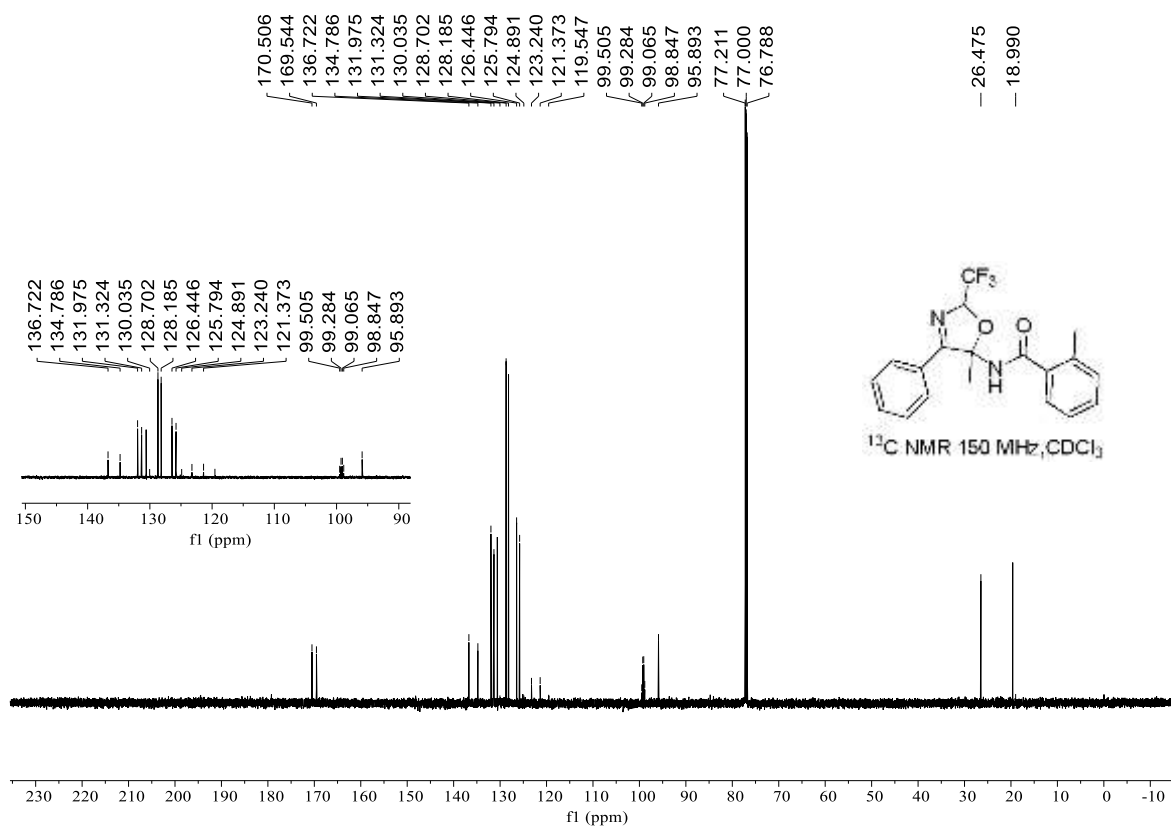

$^{19}\text{F}$  NMR (376 MHz) spectrum of **3b** in  $\text{CDCl}_3$

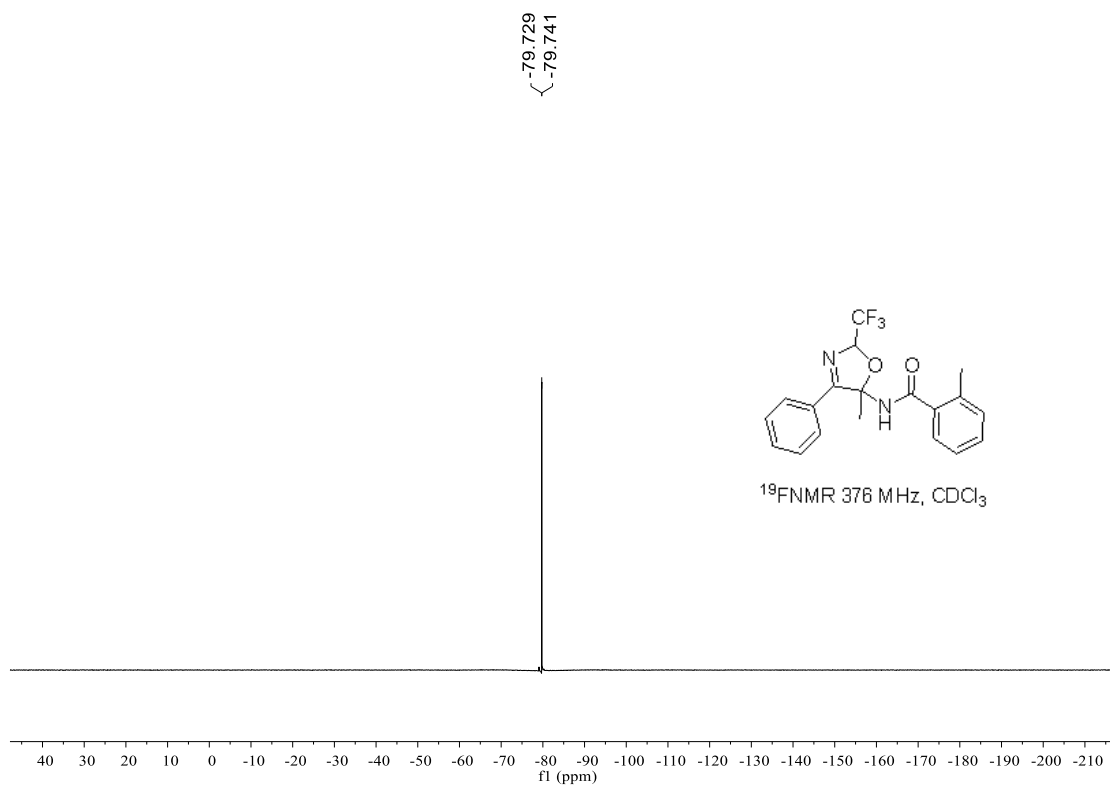

# HRMS(ESI) copy of compound **3b**:

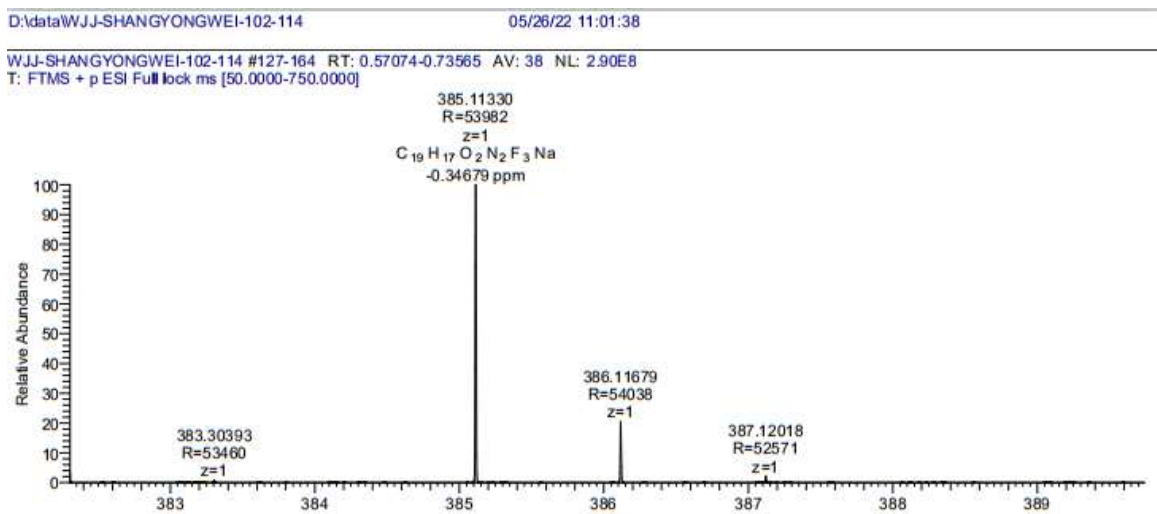

WJJ-SHANGYONGWEI-102-114#127-164 RT: 0.57074-0.73565 AV: 38  
T: FTMS + p ESI Full lock ms [50.0000-750.0000]  
m/z= 382.30544-389.74055

| m/z       | Intensity   | Relative | Resolution | Charge | Delta (ppm) | Composition                                                                     |
|-----------|-------------|----------|------------|--------|-------------|---------------------------------------------------------------------------------|
| 383.30393 | 2166418.5   | 0.74     | 53460.42   | 1.00   |             |                                                                                 |
| 385.11330 | 293270720.0 | 100.00   | 53982.20   | 1.00   | -0.35       | C <sub>19</sub> H <sub>17</sub> O <sub>2</sub> N <sub>2</sub> F <sub>3</sub> Na |
| 386.11679 | 59565728.0  | 20.31    | 54038.04   | 1.00   |             |                                                                                 |
| 387.12018 | 6426921.5   | 2.19     | 52571.16   | 1.00   |             |                                                                                 |
| 388.35477 | 789008.3    | 0.27     | 54909.49   | 1.00   |             |                                                                                 |

# NMR copies of compound **3c**

<sup>1</sup>H NMR (400 MHz) spectrum of **3c** in CDCl<sub>3</sub>

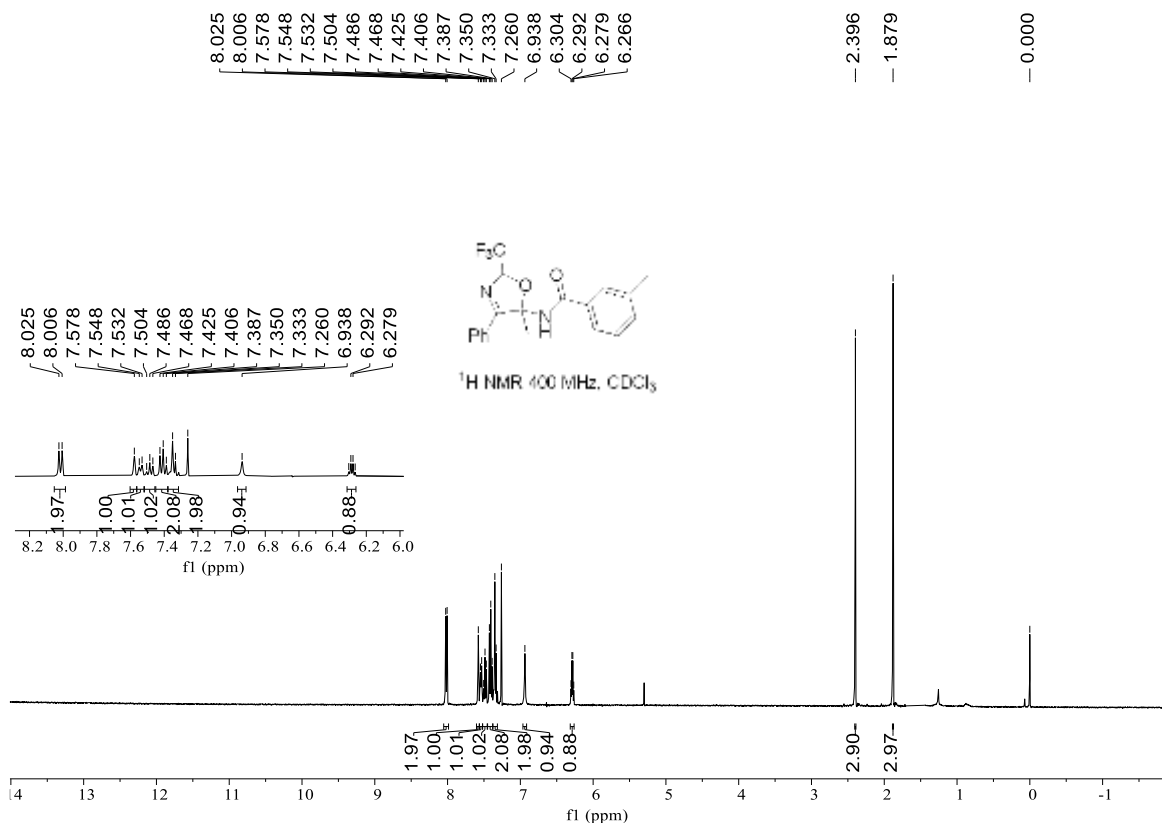

$^{13}\text{C}$  NMR (150 MHz) spectrum of **3c** in  $\text{CDCl}_3$

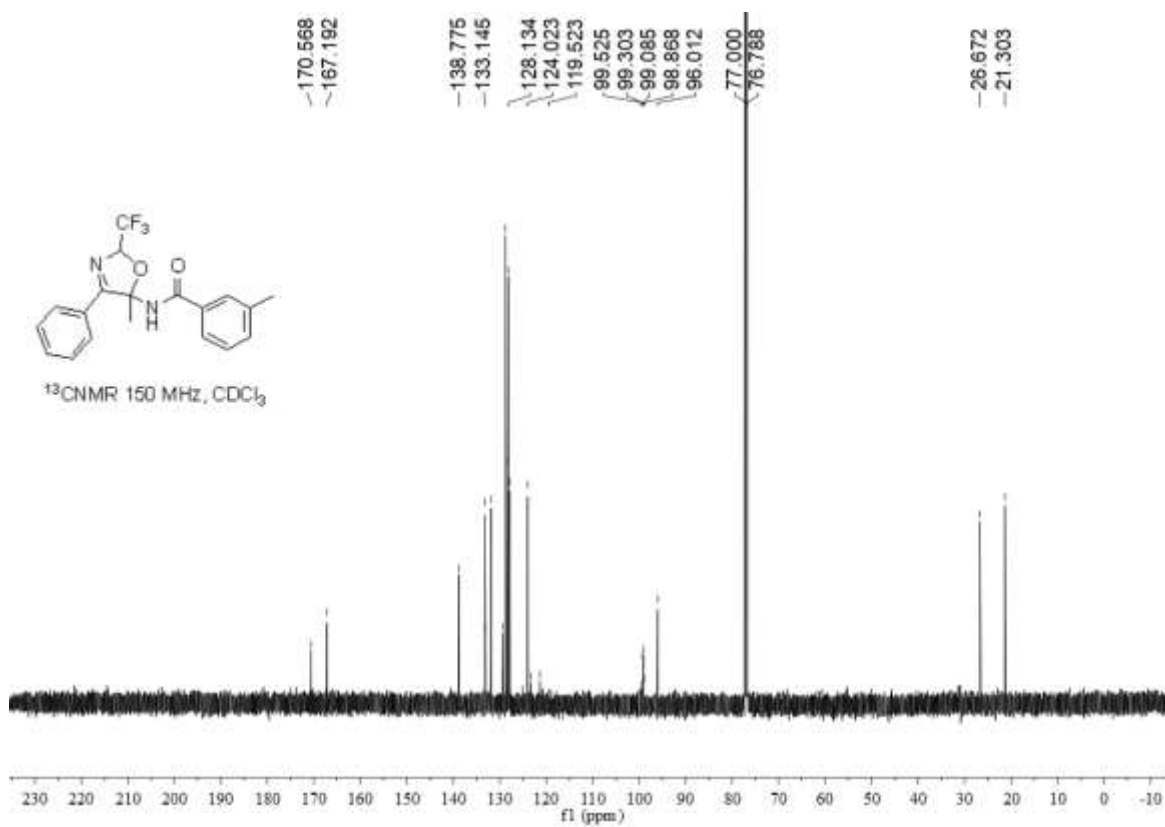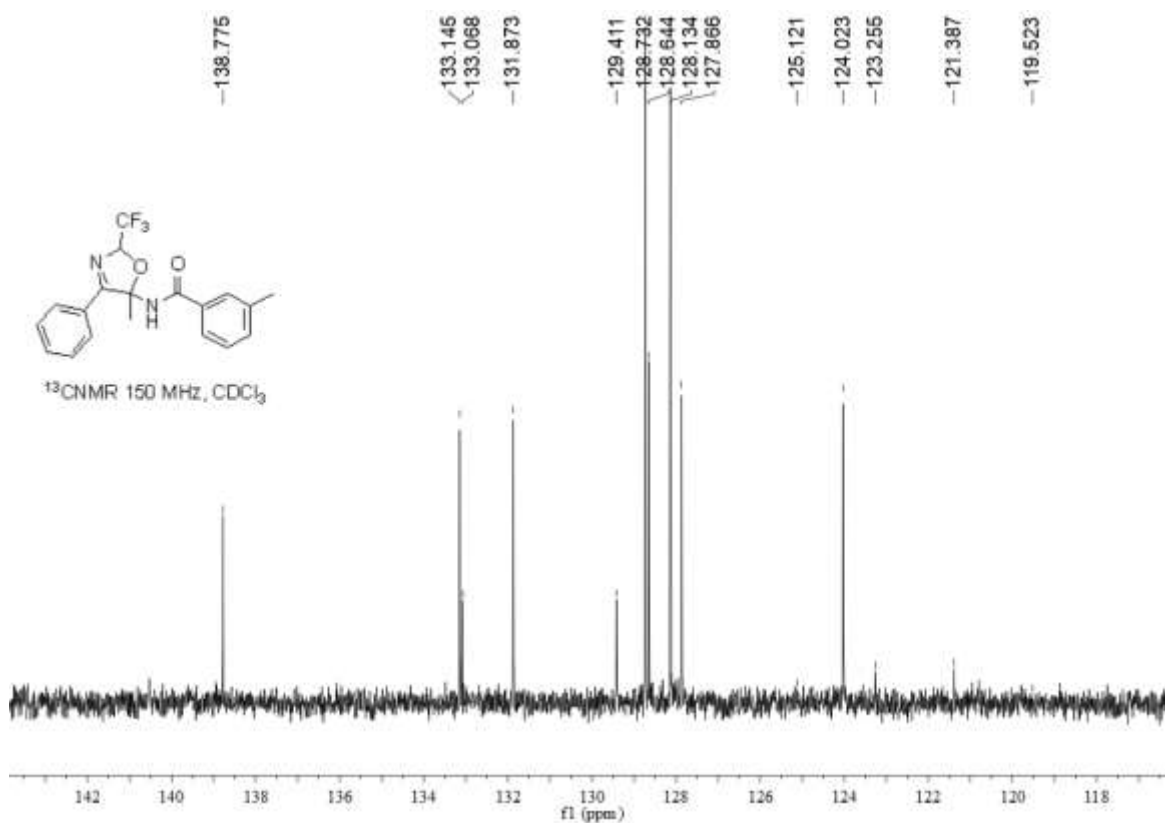

$^{19}\text{F}$  NMR (376 MHz) spectrum of **3c** in  $\text{CDCl}_3$

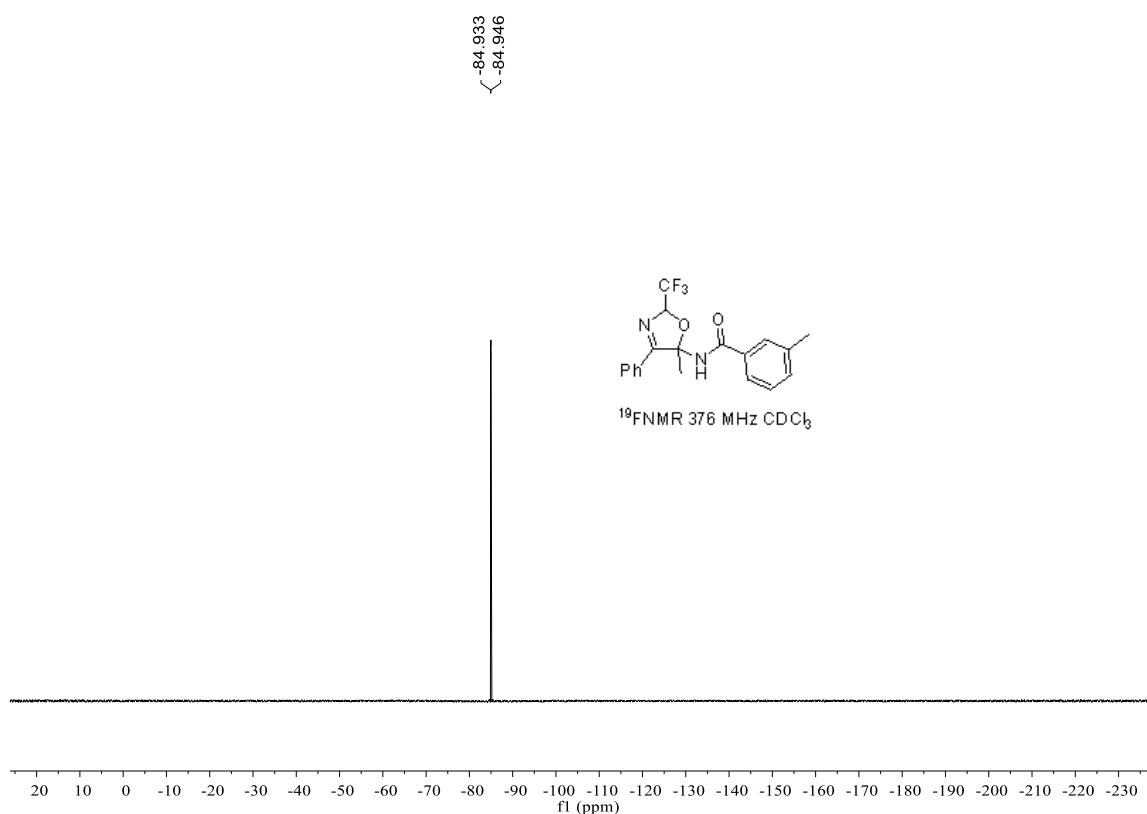

HRMS(ESI) copy of compound **3c**:

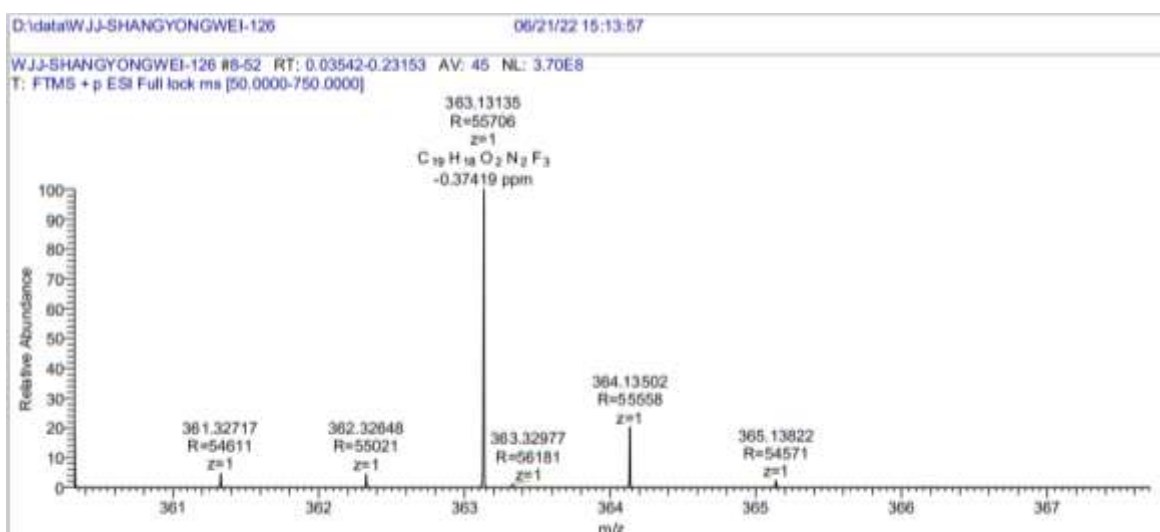

WJJ-SHANGYONGWEI-126#8-52 RT: 0.03542-0.23153 AV: 45  
 T: FTMS + p ESI Full lock ms [50.0000-750.0000]  
 m/z = 360.32286-367.70064

| m/z       | Intensity   | Relative | Resolution | Charge | Delta (ppm) | Composition                                                |
|-----------|-------------|----------|------------|--------|-------------|------------------------------------------------------------|
| 360.32370 | 76270824.0  | 20.37    | 57067.89   | 1.00   |             |                                                            |
| 361.32717 | 17765272.0  | 4.74     | 54611.46   | 1.00   |             |                                                            |
| 361.72124 | 409708.9    | 0.11     | 55002.38   | 0.00   |             |                                                            |
| 362.32648 | 16638300.0  | 4.44     | 55021.12   | 1.00   |             |                                                            |
| 363.13135 | 374509088.0 | 100.00   | 55705.54   | 1.00   | -0.37       | $\text{C}_{19}\text{H}_{18}\text{O}_2\text{N}_2\text{F}_3$ |
| 363.32977 | 3517212.8   | 0.94     | 56181.02   | 1.00   |             |                                                            |
| 364.13502 | 75803224.0  | 20.24    | 55558.20   | 1.00   |             |                                                            |
| 365.13822 | 8321985.0   | 2.22     | 54570.79   | 1.00   |             |                                                            |
| 366.18156 | 527668.8    | 0.14     | 55480.00   | 0.00   |             |                                                            |

NMR copies of compound **3d**

$^1\text{H}$  NMR (400 MHz) spectrum of **3d** in  $\text{CDCl}_3$

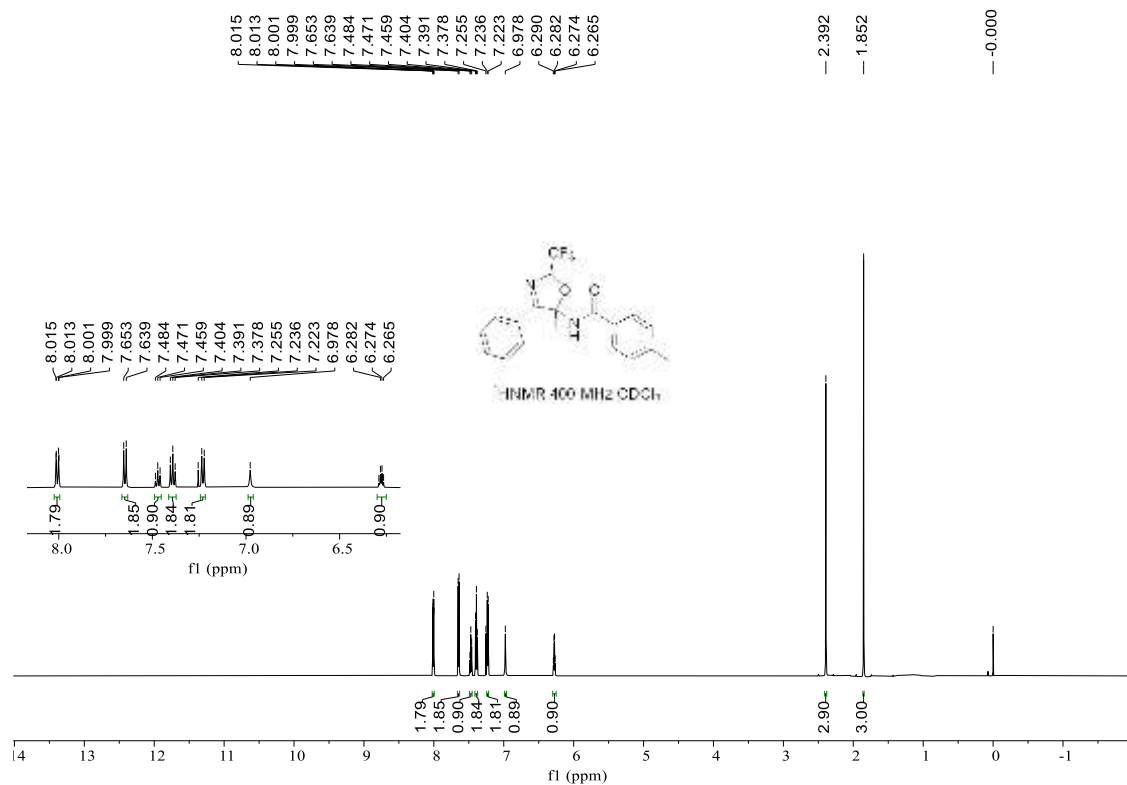

$^{13}\text{C}$  NMR (150 MHz) spectrum of **3d** in  $\text{CDCl}_3$

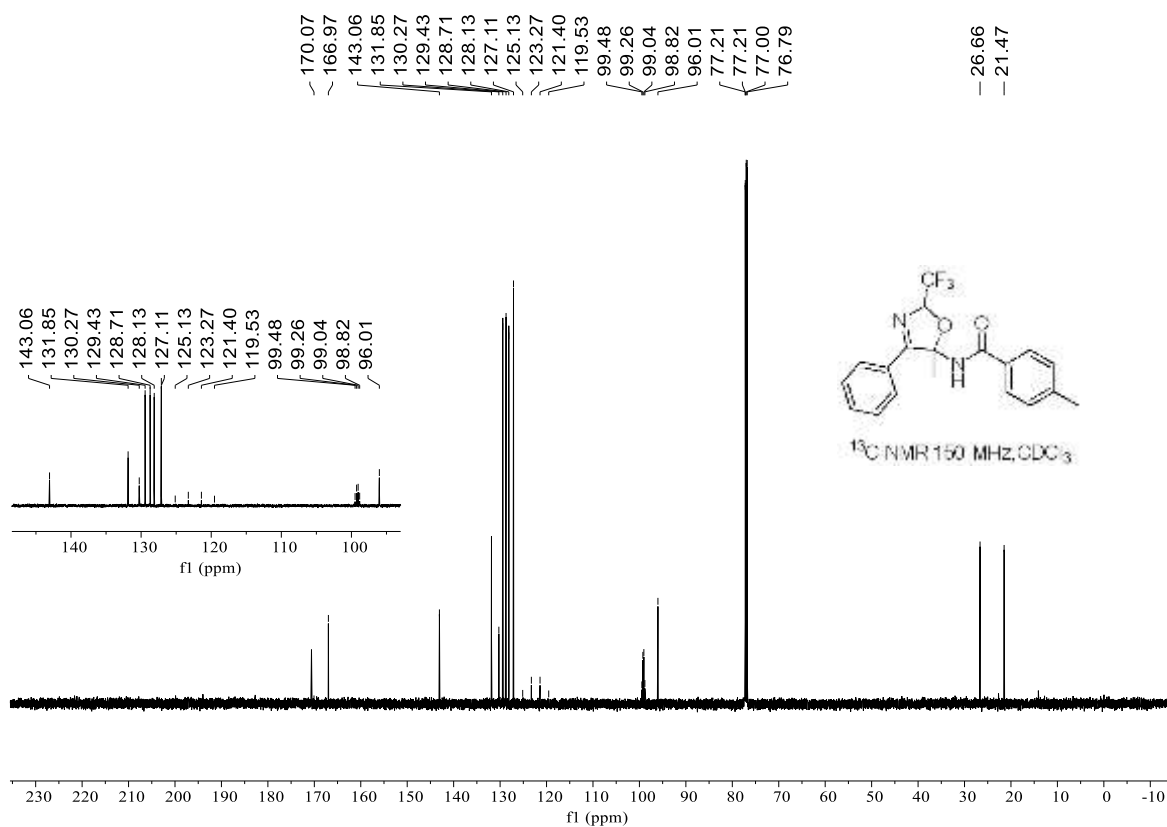



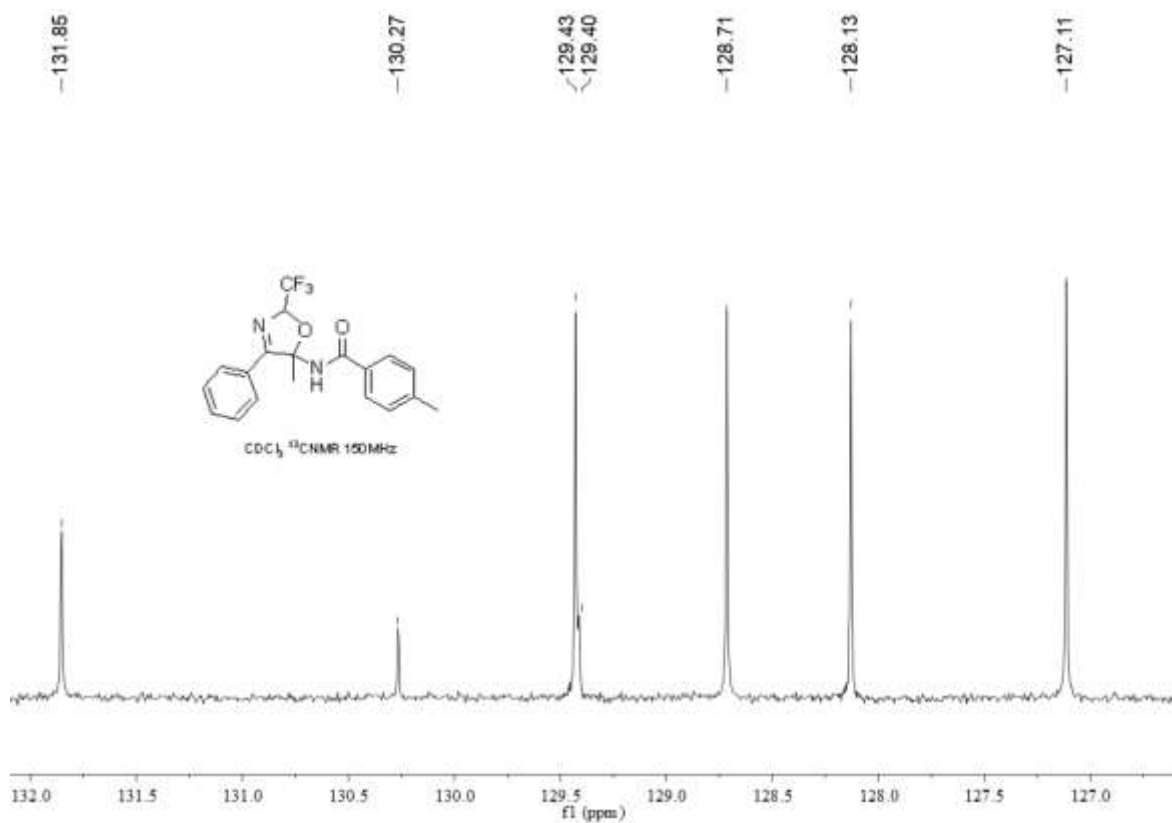

$^{19}\text{F}$  NMR (376 MHz) spectrum of **3d** in  $\text{CDCl}_3$

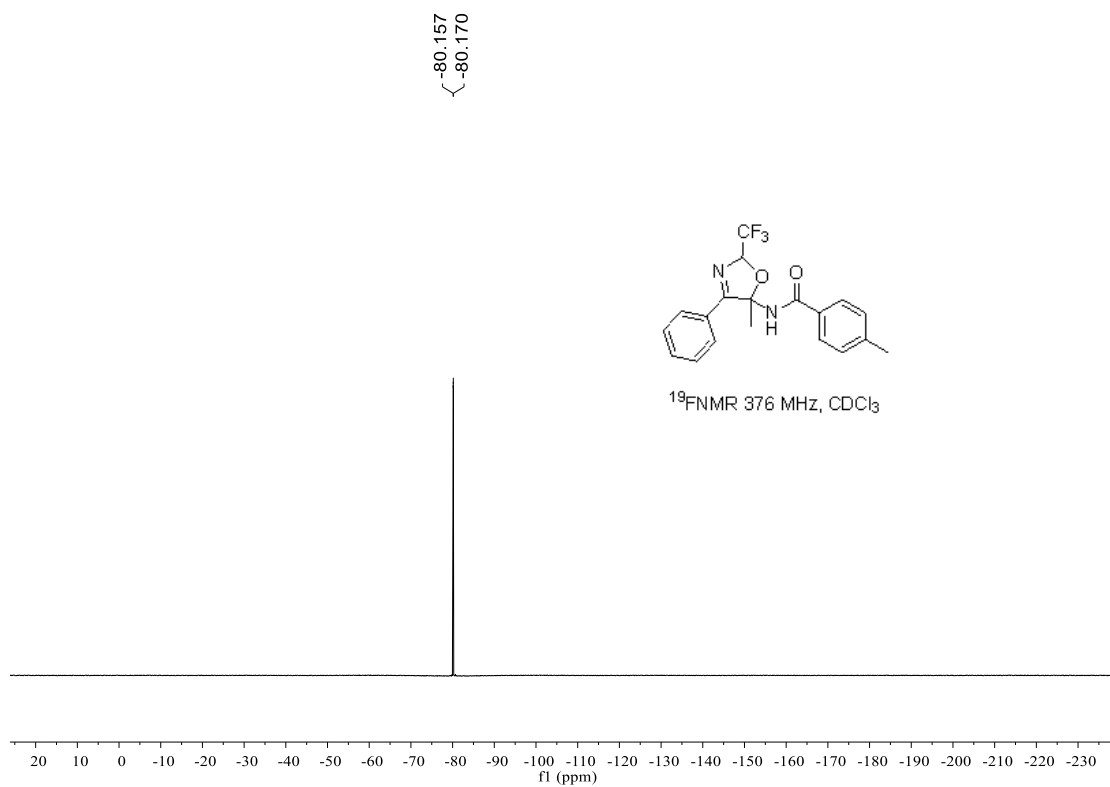

### HRMS(ESI) copy of compound **3d**:

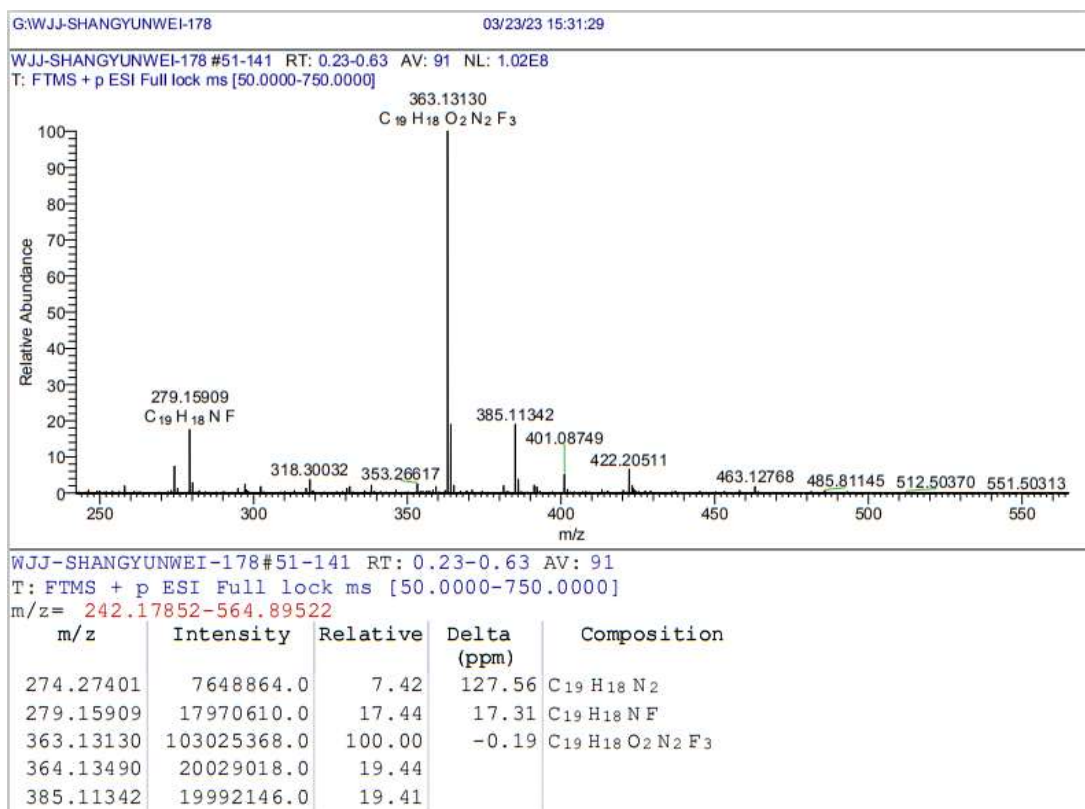

### NMR copies of compound **3e**

<sup>1</sup>H NMR (400 MHz) spectrum of **3e** in CDCl<sub>3</sub>

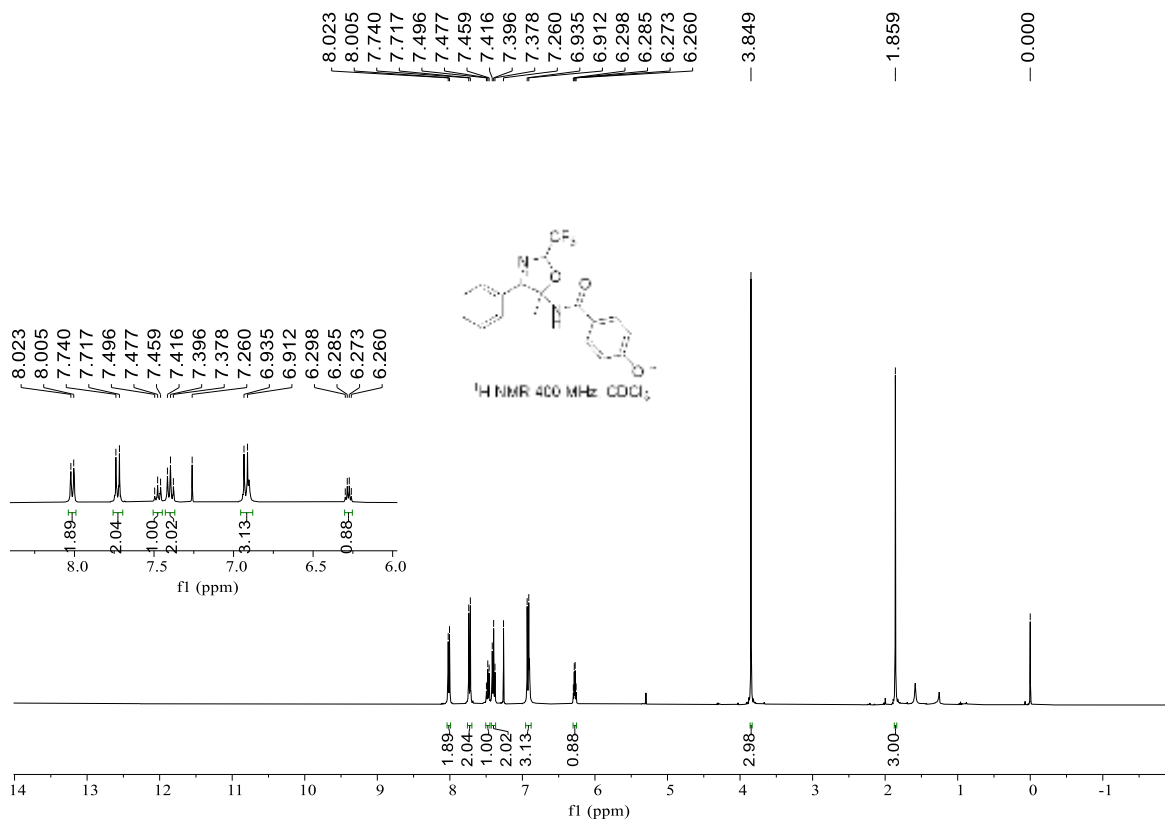

$^{13}\text{C}$  NMR (150 MHz) spectrum of **3e** in  $\text{CDCl}_3$

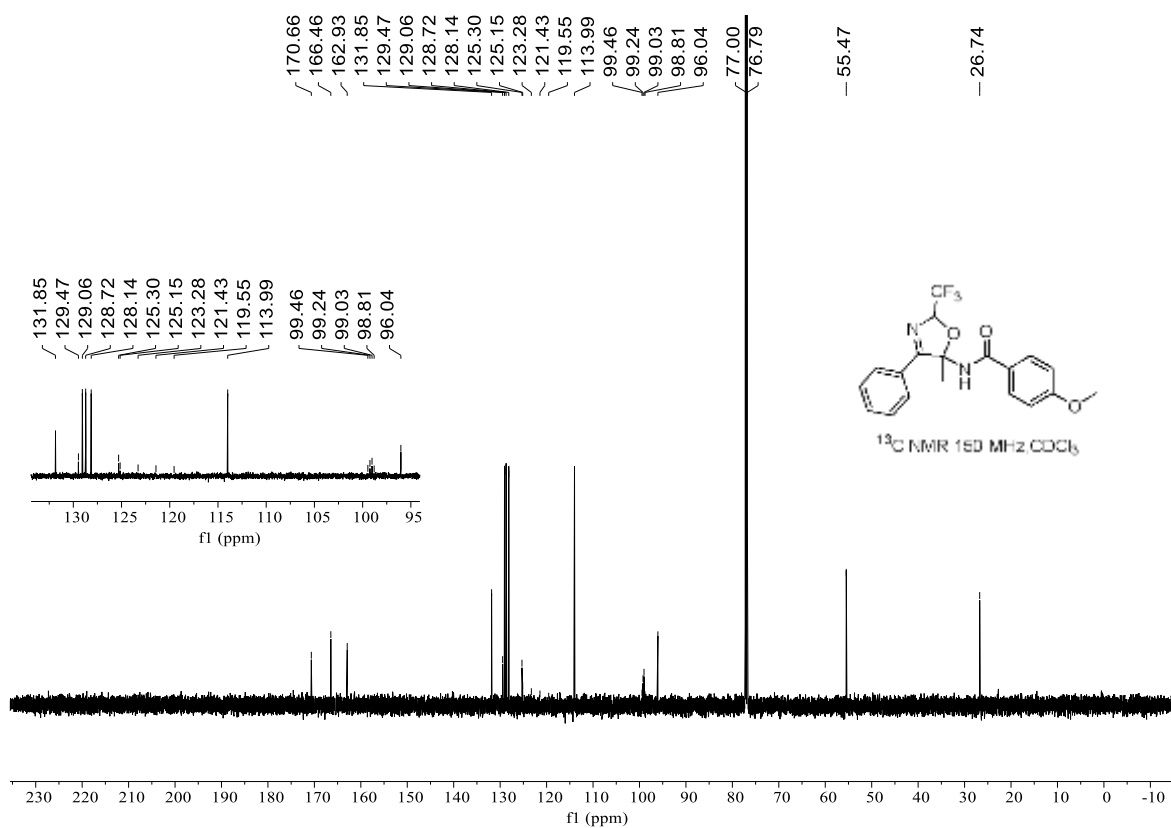

$^{19}\text{F}$  NMR (376 MHz) spectrum of **3e** in  $\text{CDCl}_3$

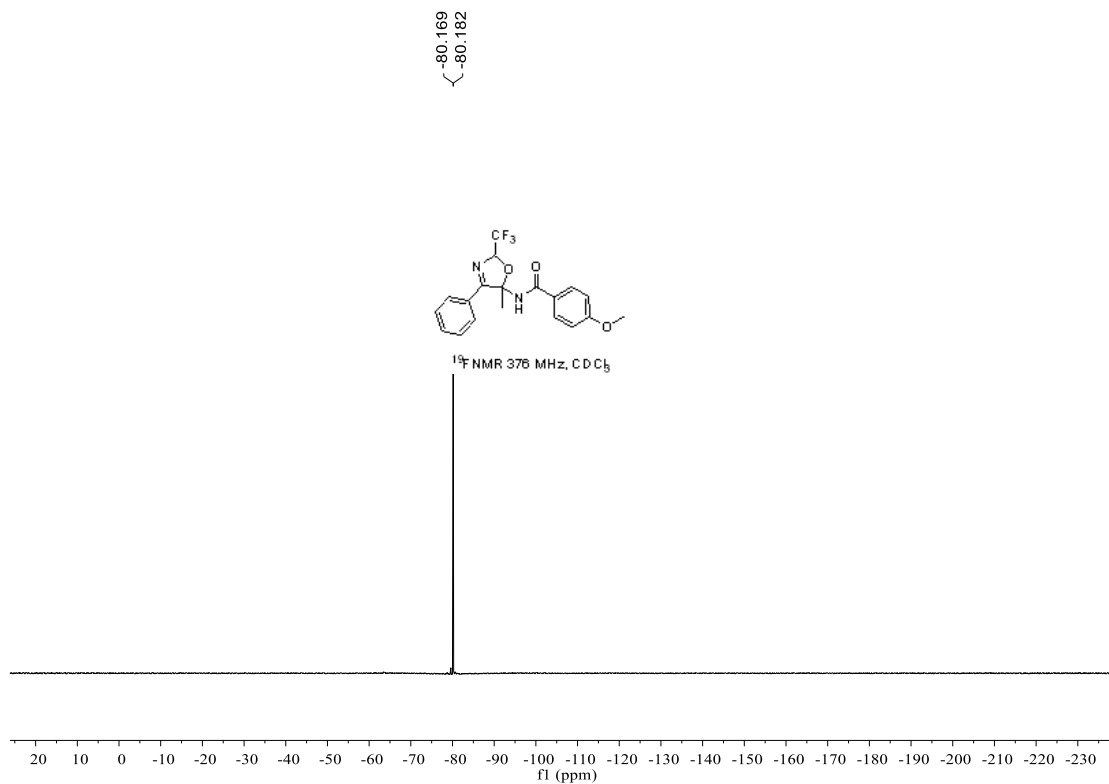

## HRMS(ESI) copy of compound **3e**:

D:\data\WJJ-SHANGYONGWEI-105

05/26/22 10:52:01

WJJ-SHANGYONGWEI-105 #21-56 RT: 0.09337-0.24936 AV: 36 NL: 3,47E7  
T: FTMS - p ESI Full lock ms [50.0000-750.0000]

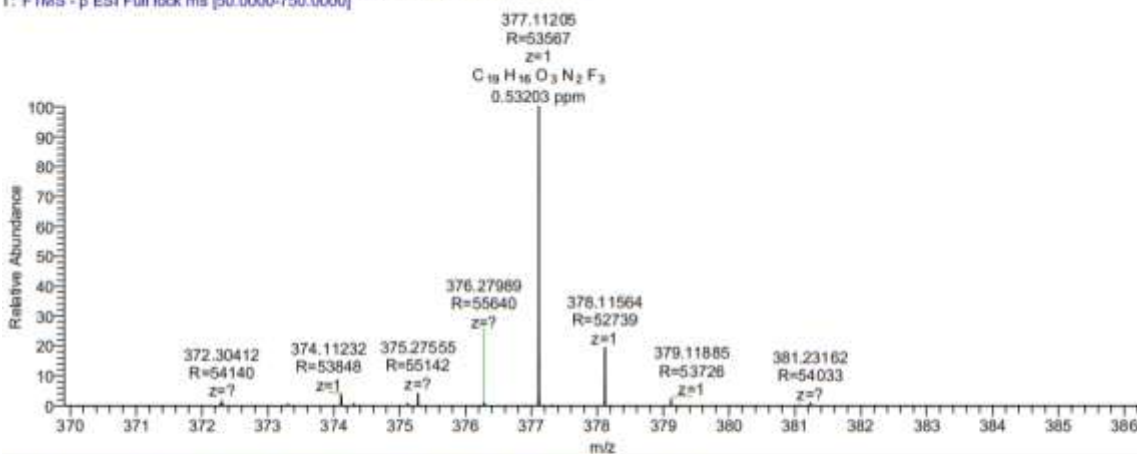

WJJ-SHANGYONGWEI-105#21-56 RT: 0.09337-0.24936 AV: 36  
T: FTMS - p ESI Full lock ms [50.0000-750.0000]

m/z= 369.90846-386.26392

| m/z       | Intensity  | Relative | Resolution | Charge | Delta (ppm) | Composition                                                                  |
|-----------|------------|----------|------------|--------|-------------|------------------------------------------------------------------------------|
| 374.11232 | 1301427.4  | 3.66     | 53848.32   | 1.00   |             |                                                                              |
| 375.27555 | 1417542.8  | 3.99     | 55142.22   | 0.00   |             |                                                                              |
| 377.11205 | 35527616.0 | 100.00   | 53567.28   | 1.00   | 0.53        | C <sub>19</sub> H <sub>16</sub> O <sub>3</sub> N <sub>2</sub> F <sub>3</sub> |
| 378.11564 | 6952328.0  | 19.57    | 52739.29   | 1.00   |             |                                                                              |
| 379.11885 | 794741.3   | 2.24     | 53726.41   | 1.00   |             |                                                                              |

## NMR copies of compound **3f**

<sup>1</sup>H NMR (400 MHz) spectrum of **3f** in CDCl<sub>3</sub>

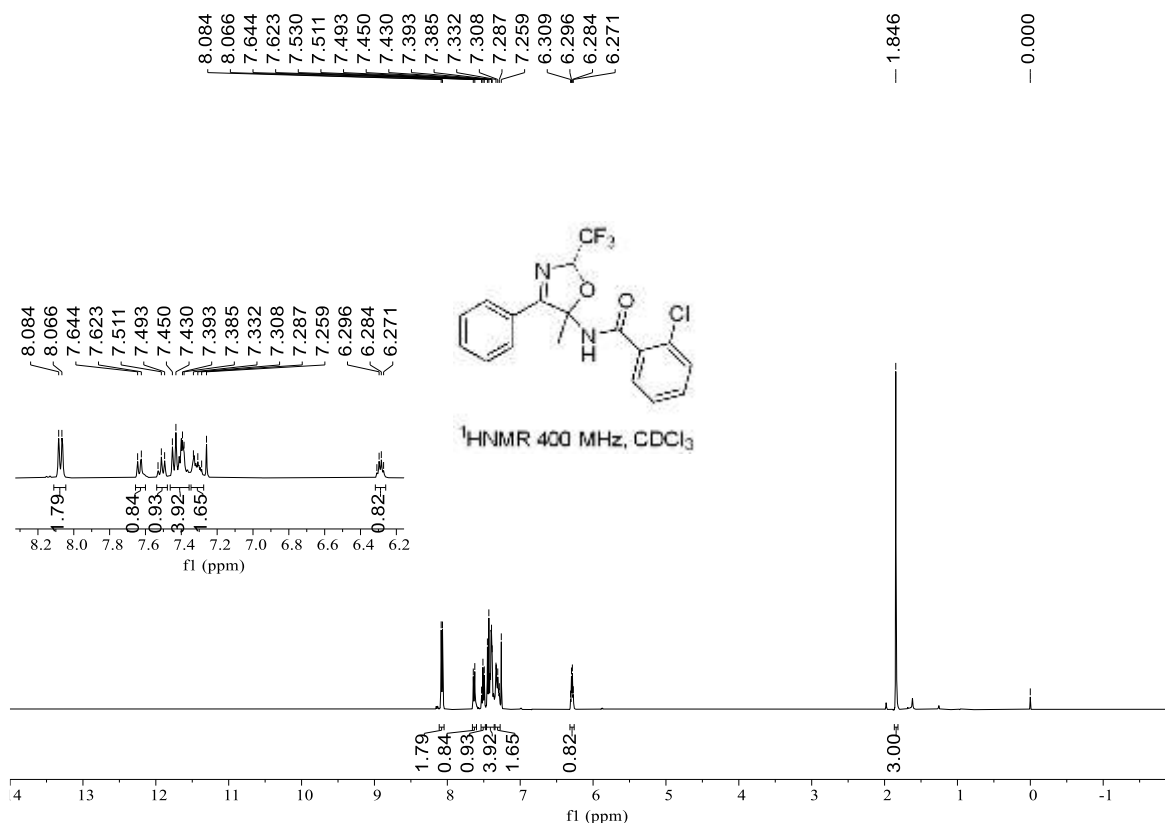

$^{13}\text{C}$  NMR (150 MHz) spectrum of **3f** in  $\text{CDCl}_3$

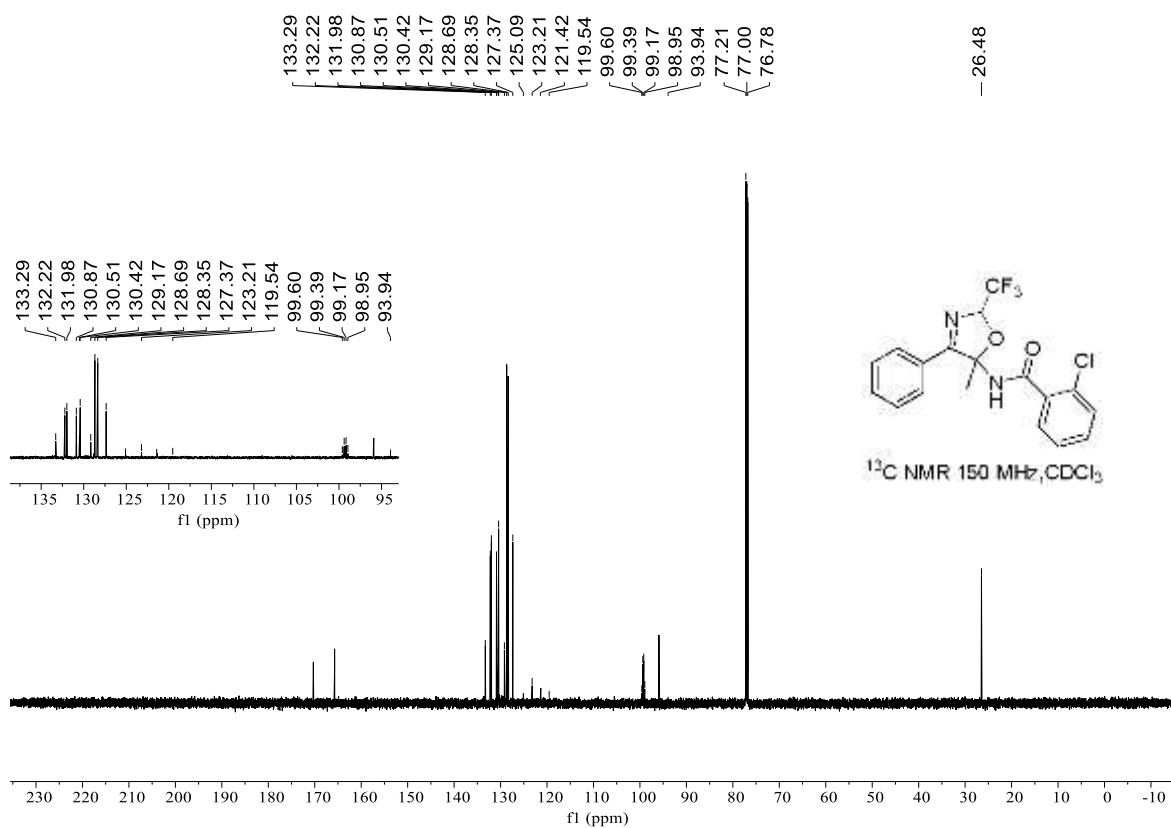

$^{19}\text{F}$  NMR (376 MHz) spectrum of **3f** in  $\text{CDCl}_3$

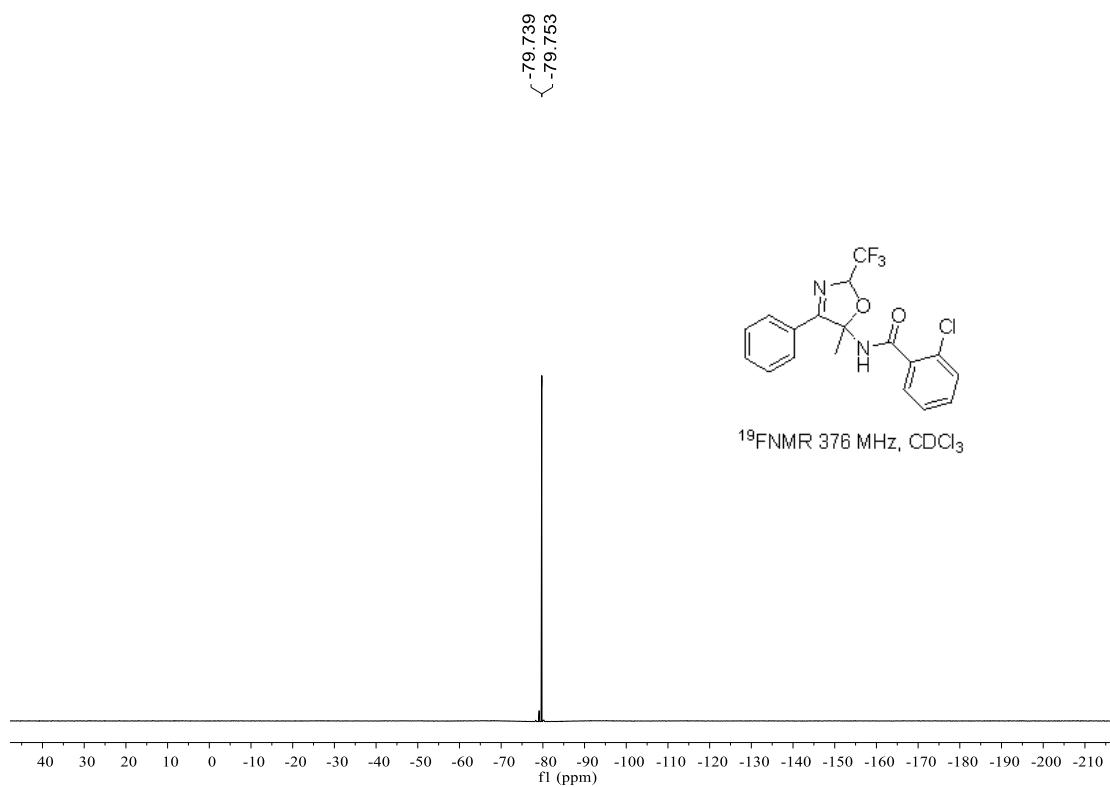

### HRMS(ESI) copy of compound **3f**:

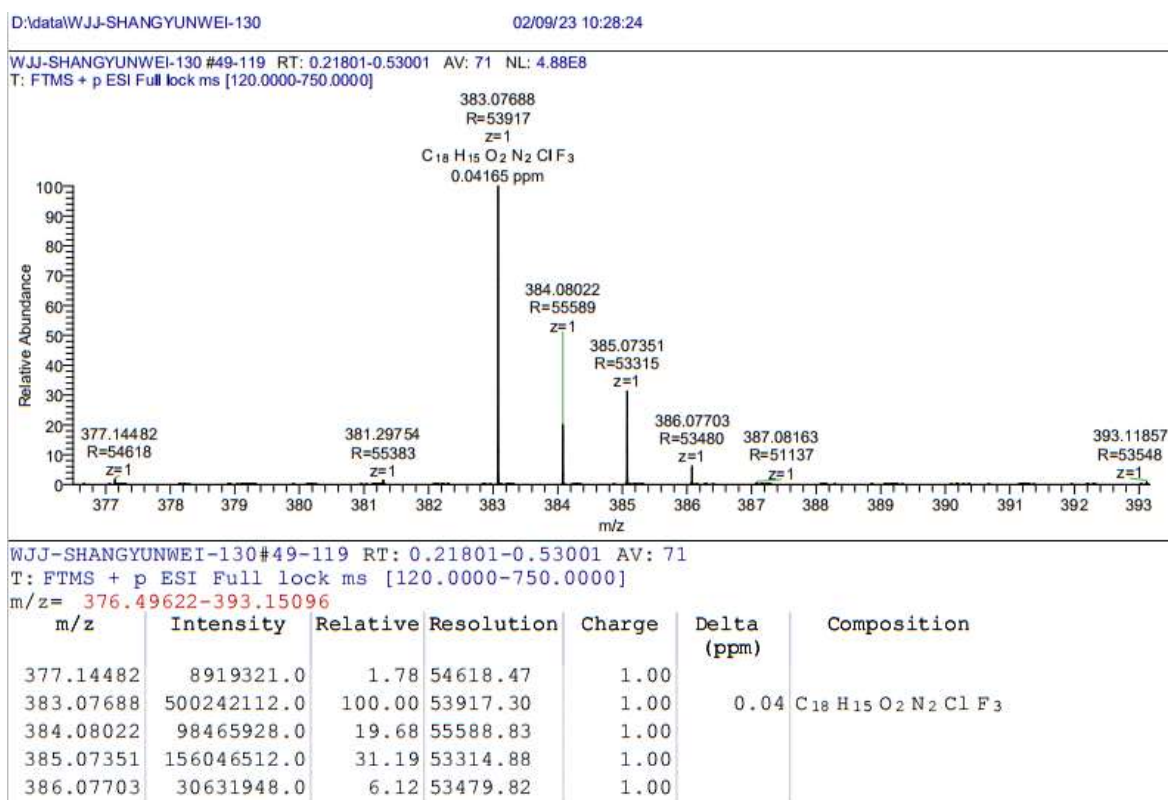

### NMR copies of compound **3g**

<sup>1</sup>H NMR (400 MHz) spectrum of **3g** in CDCl<sub>3</sub>

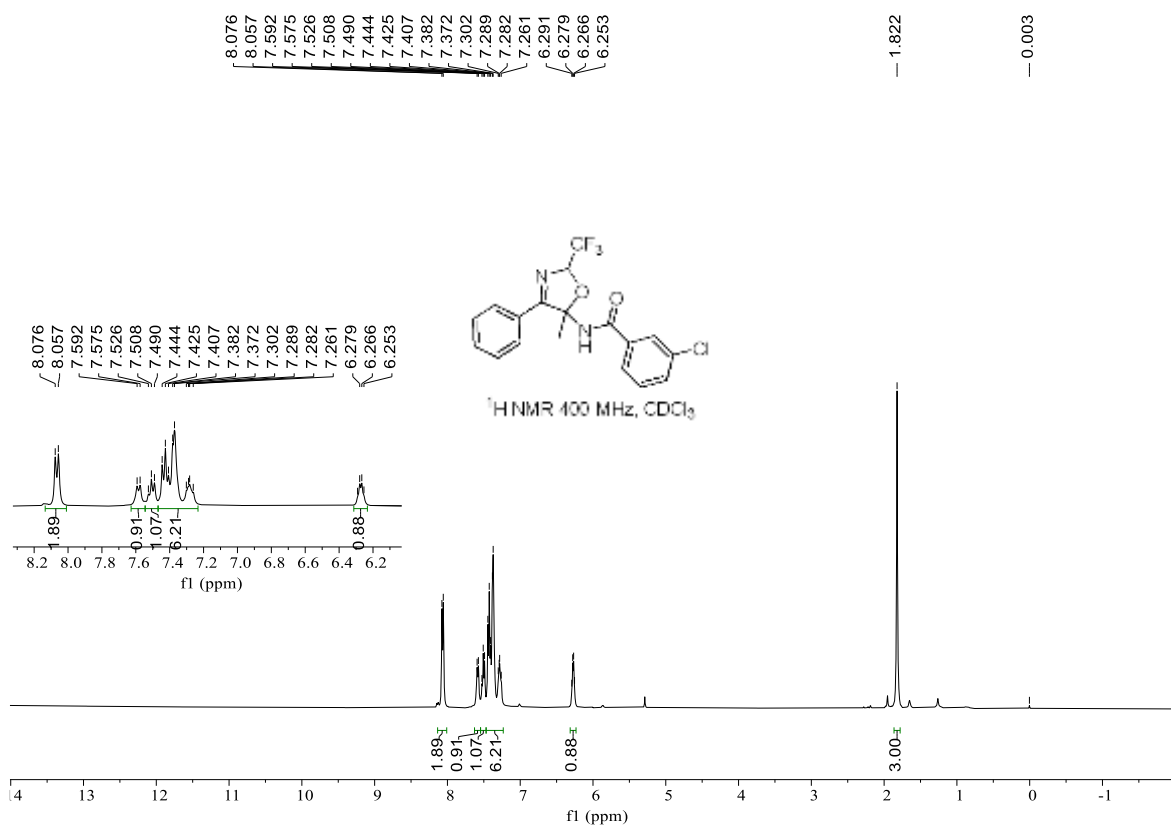

$^{13}\text{C}$  NMR (150 MHz) spectrum of **3g** in  $\text{CDCl}_3$

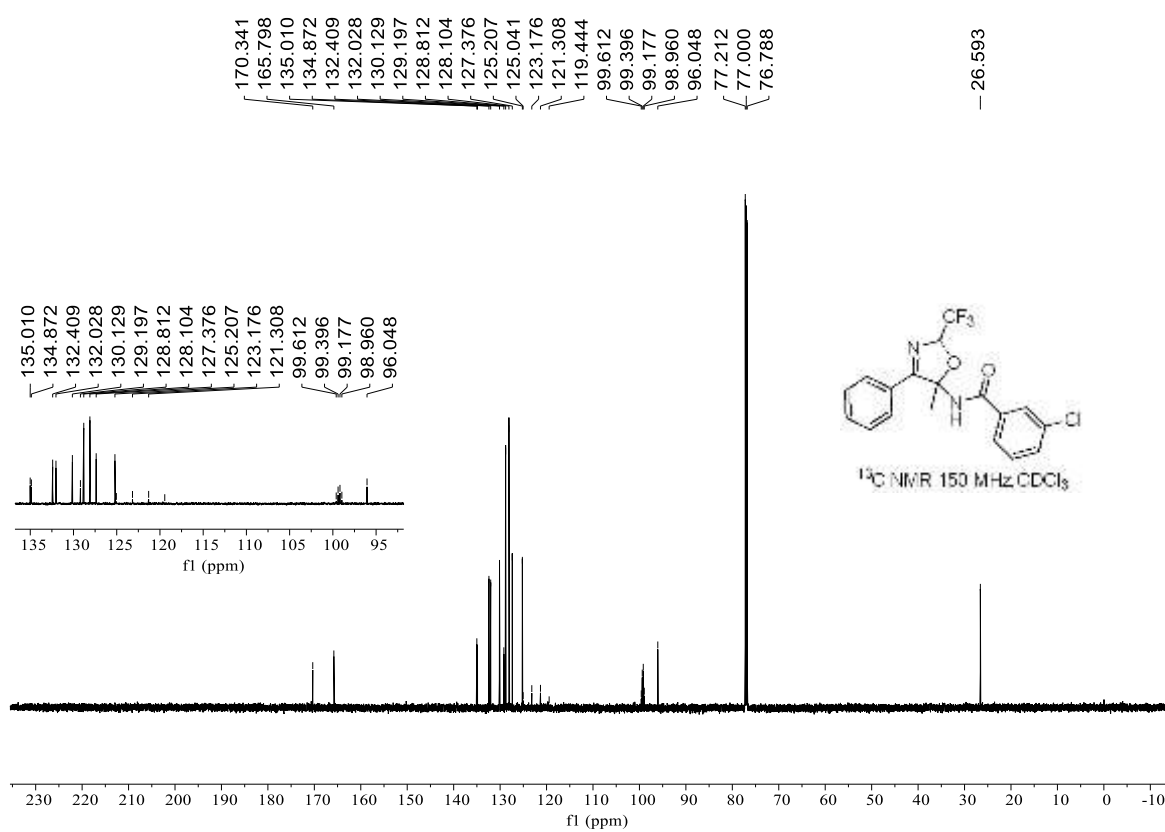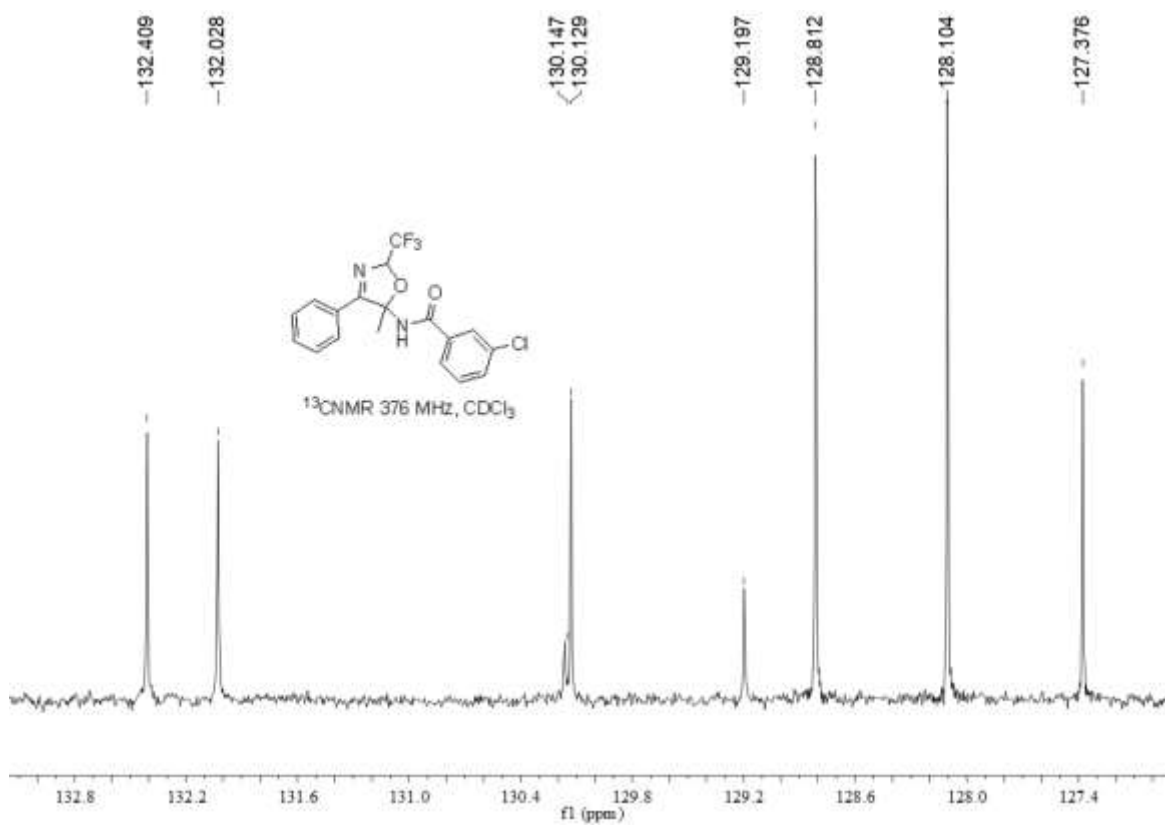

$^{19}\text{F}$  NMR (376 MHz) spectrum of **3g** in  $\text{CDCl}_3$

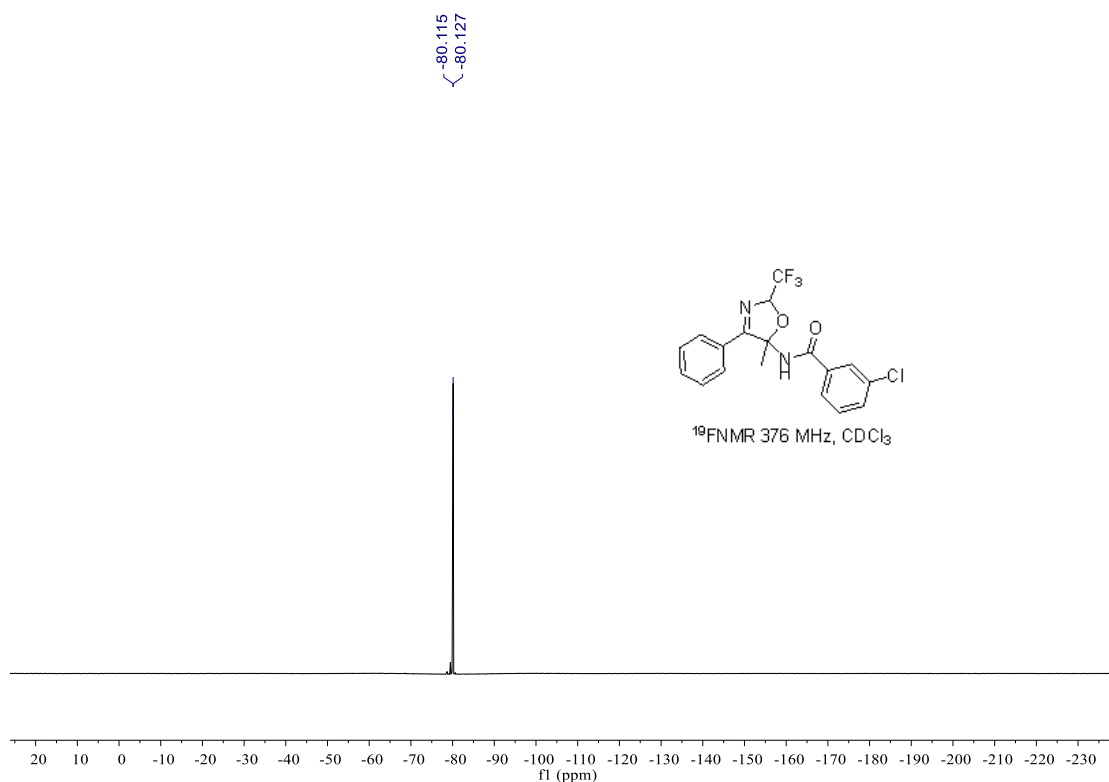

HRMS(ESI) copy of compound **3g**:

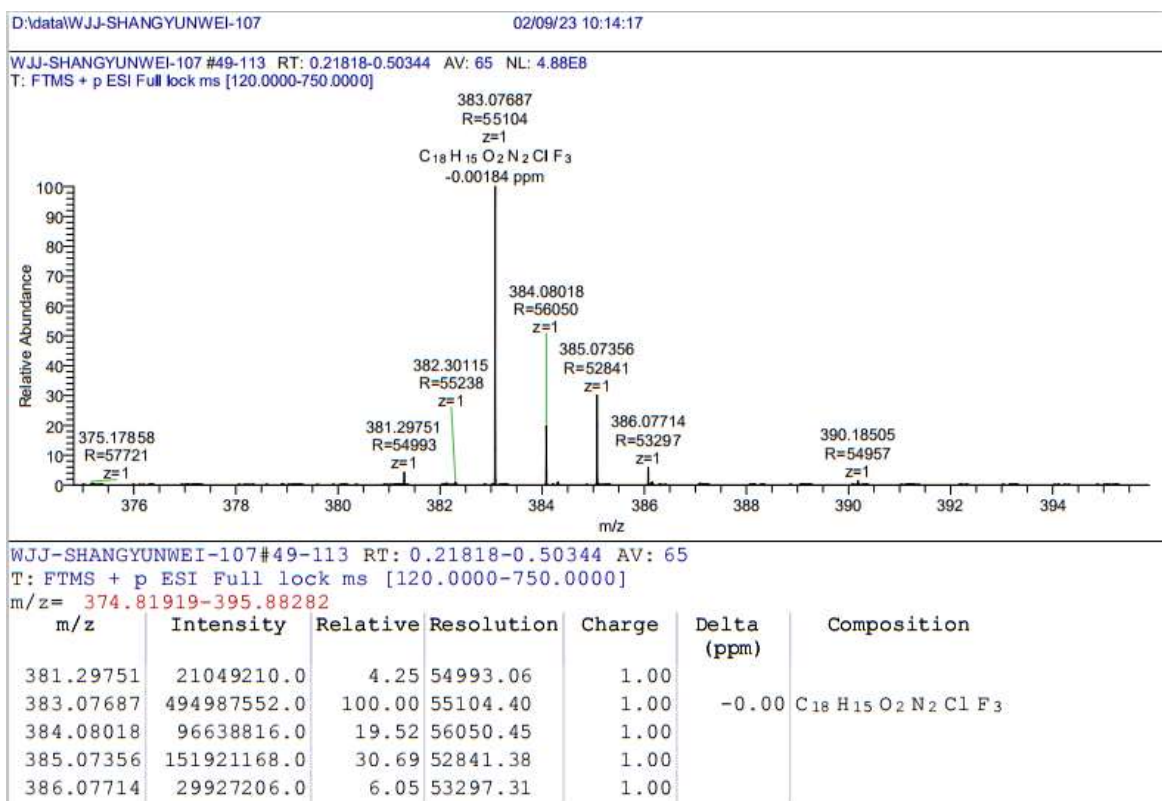



# NMR copies of compound **3h**

## <sup>1</sup>H NMR (400 MHz) spectrum of **3h** in CDCl<sub>3</sub>

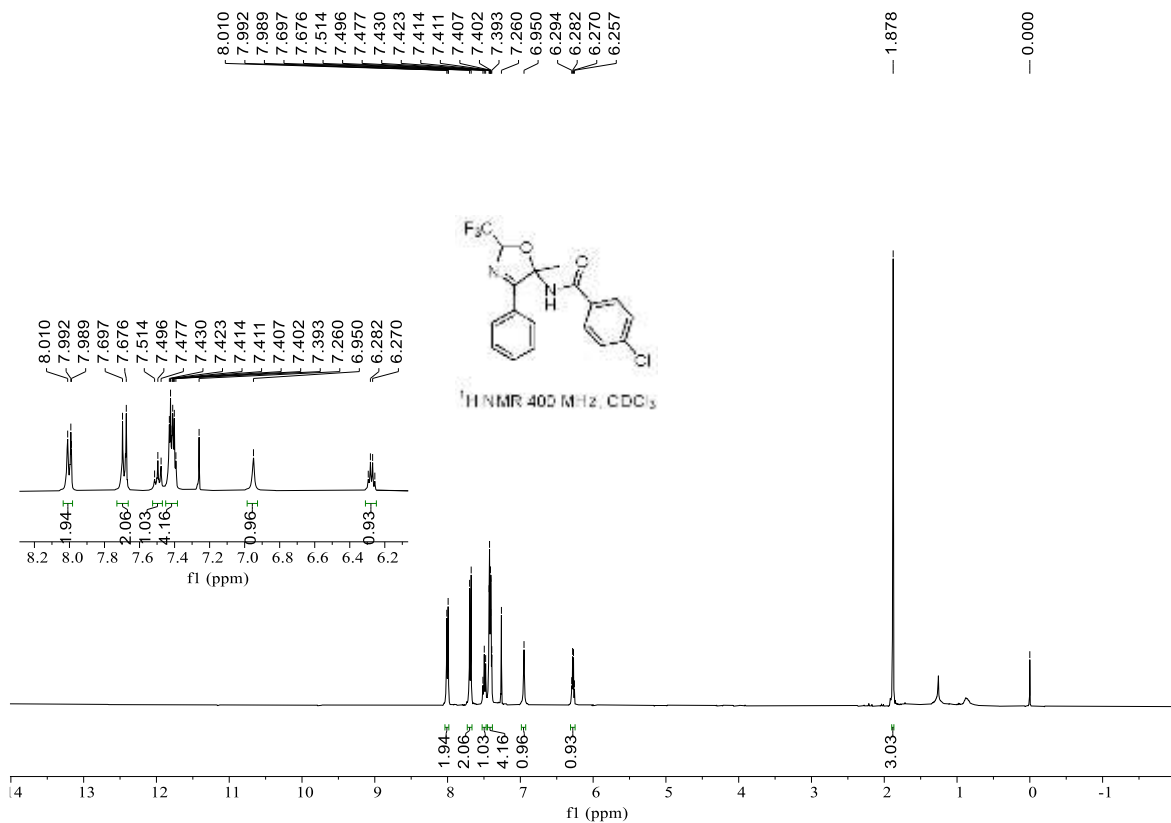

## <sup>13</sup>C NMR (150 MHz) spectrum of **3h** in CDCl<sub>3</sub>

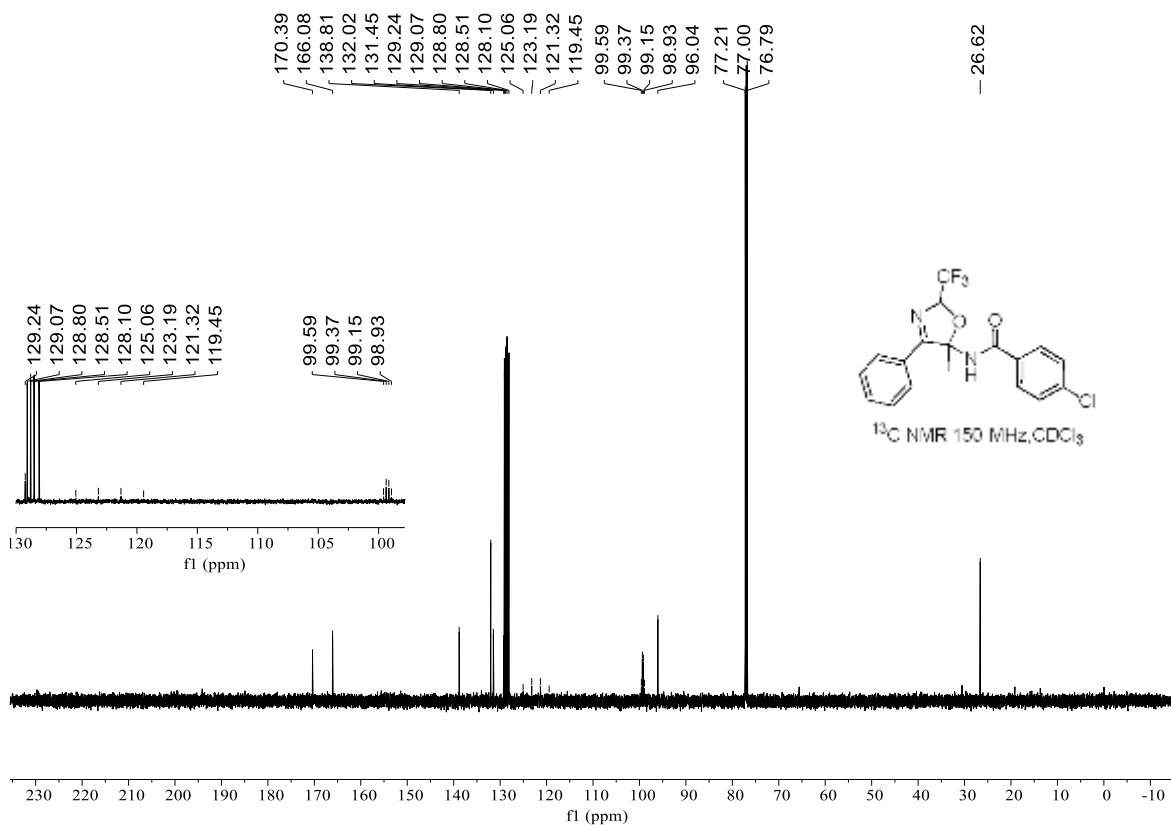

$^{19}\text{F}$  NMR (376 MHz) spectrum of **3h** in  $\text{CDCl}_3$

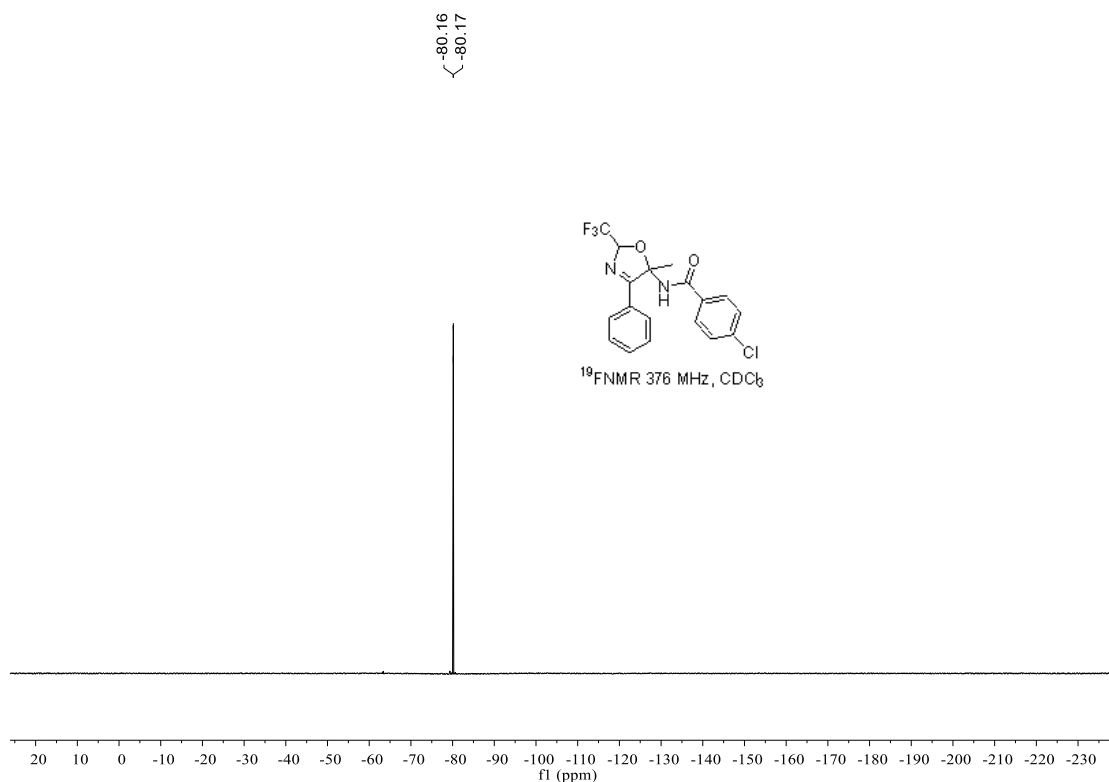

HRMS(ESI) copy of compound **3h**:

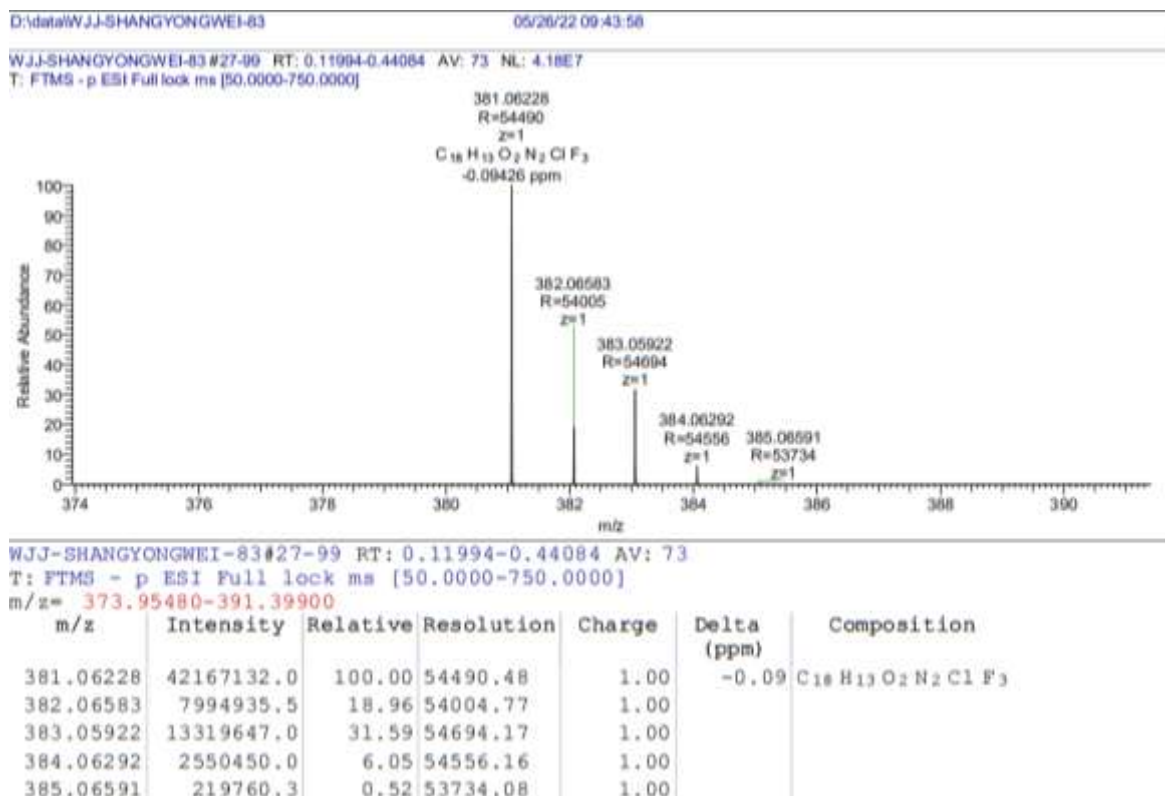

NMR copies of compound **3i**

<sup>1</sup>H NMR (400 MHz) spectrum of **3i** in CDCl<sub>3</sub>

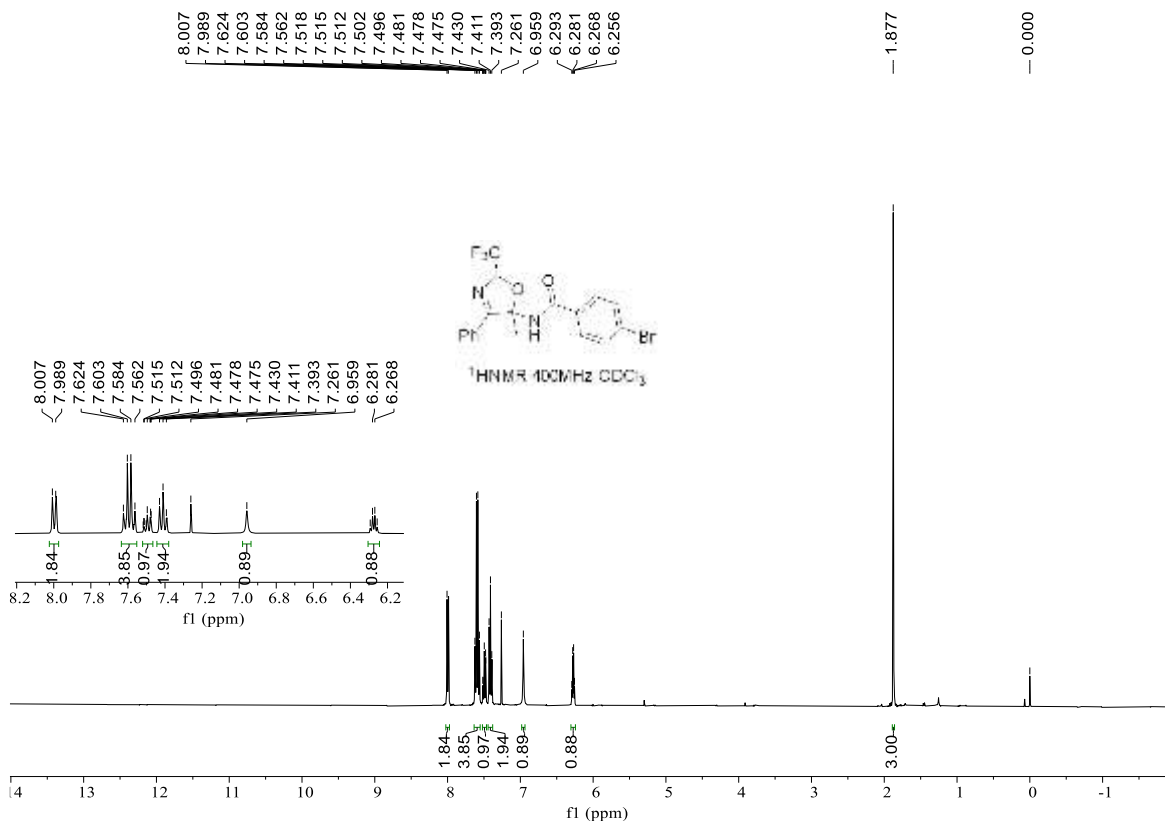

<sup>13</sup>C NMR (150 MHz) spectrum of **3i** in CDCl<sub>3</sub>

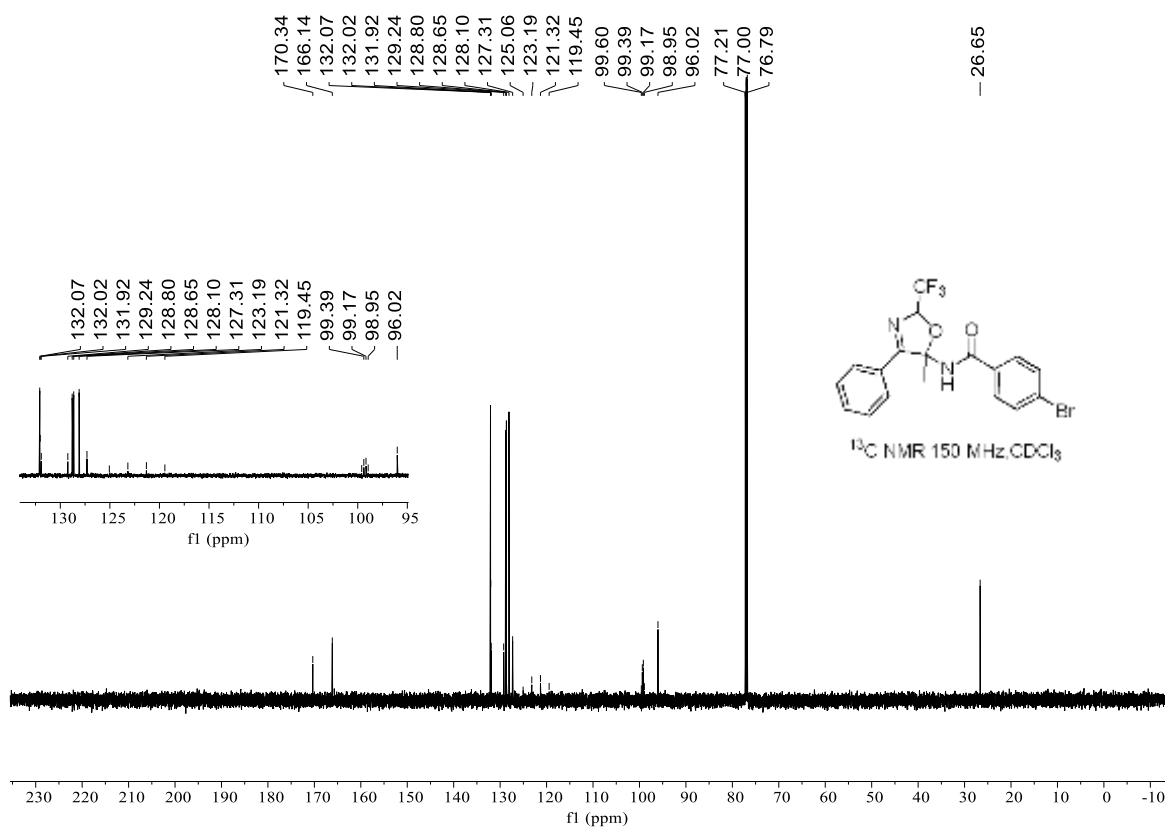

$^{19}\text{F}$  NMR (376 MHz) spectrum of **3i** in  $\text{CDCl}_3$

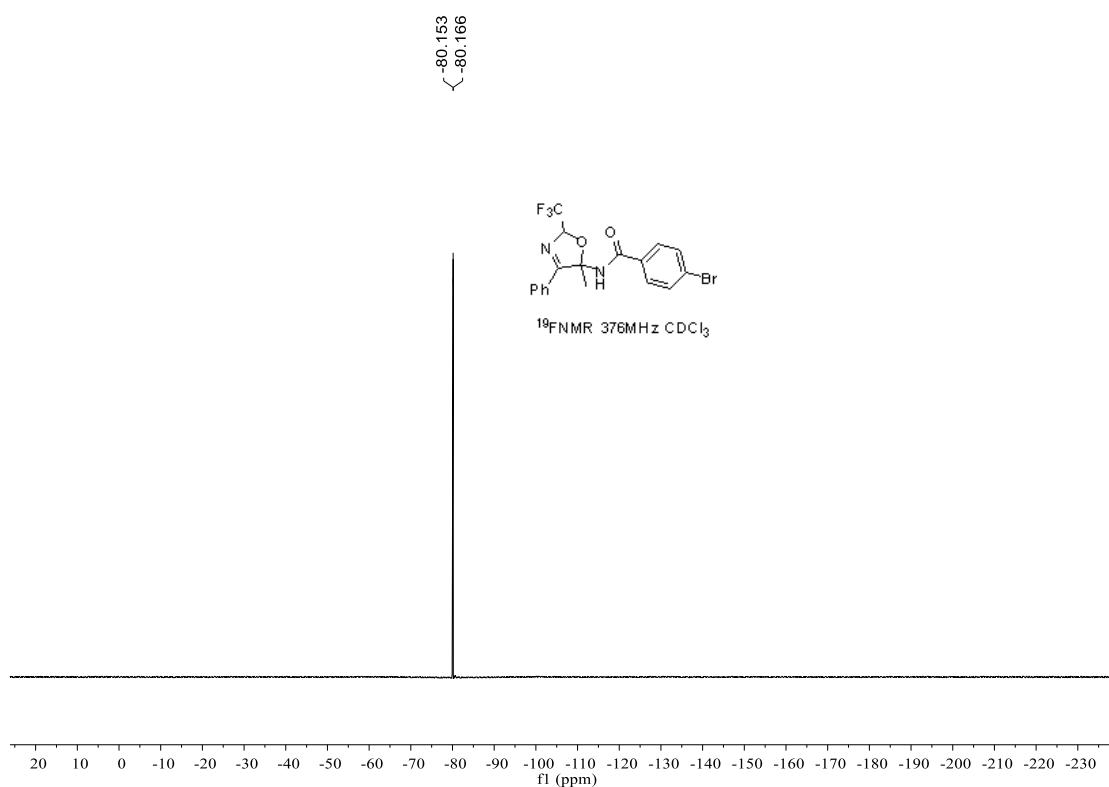

HRMS(ESI) copy of compound **3i**:

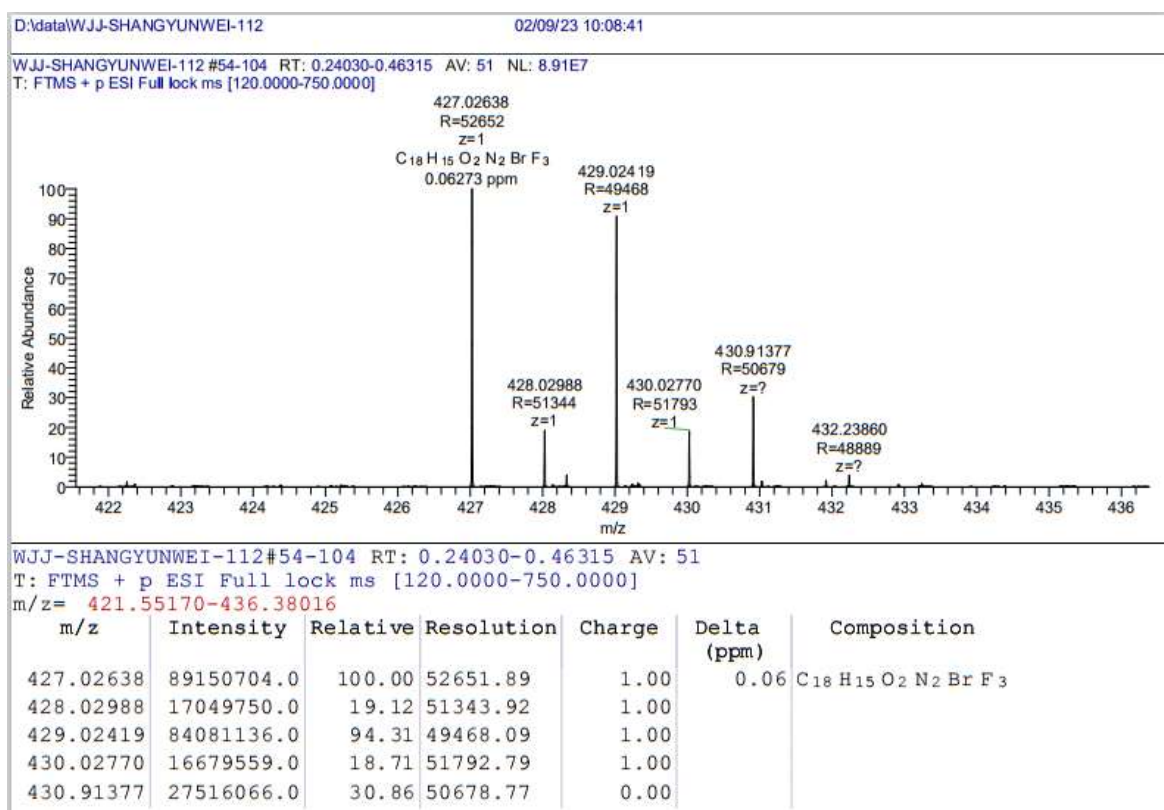

NMR copies of compound **3j**

$^1\text{H}$  NMR (400 MHz) spectrum of **3j** in  $\text{CDCl}_3$

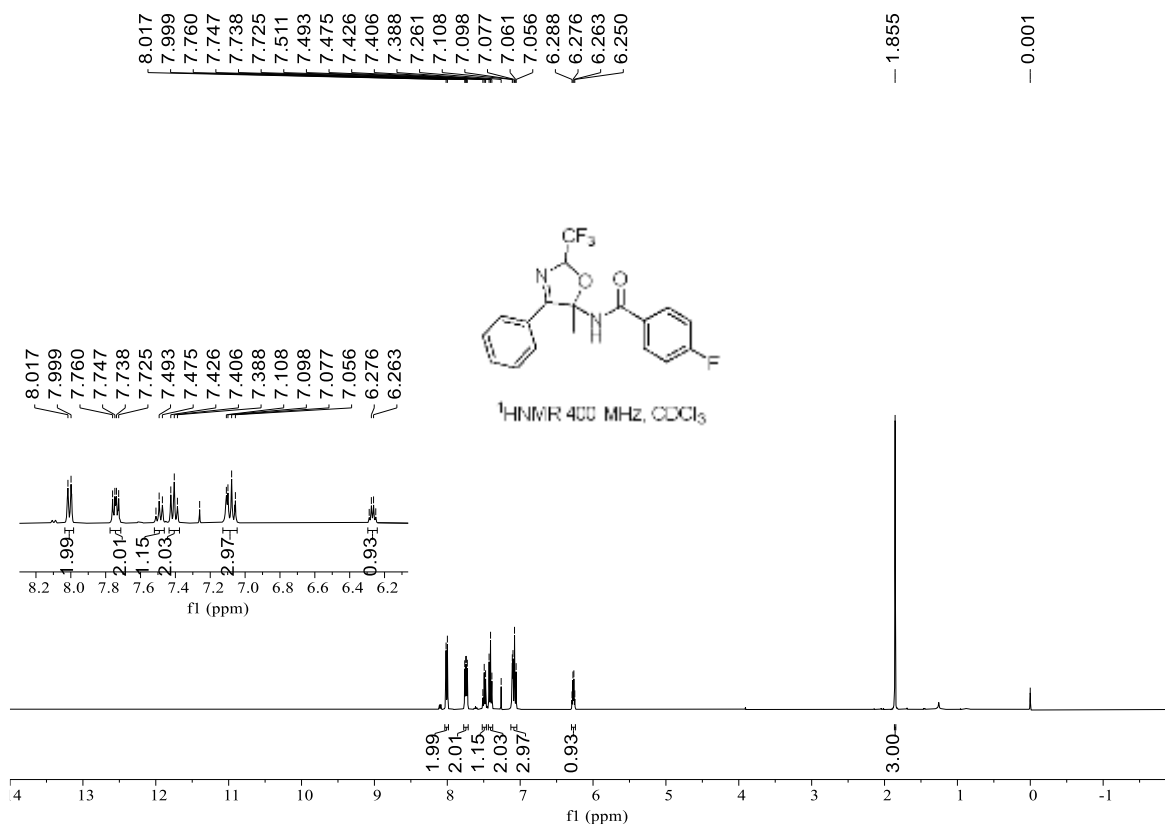

$^{13}\text{C}$  NMR (150 MHz) spectrum of **3j** in  $\text{CDCl}_3$

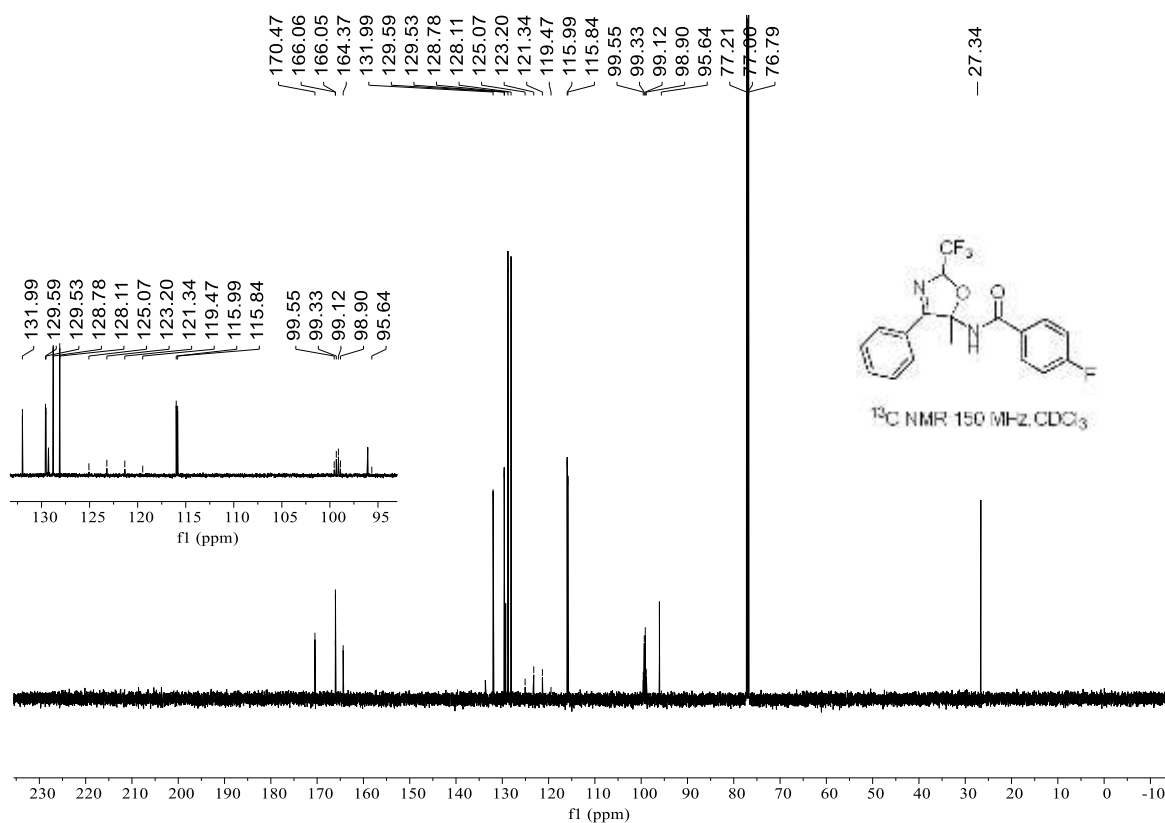

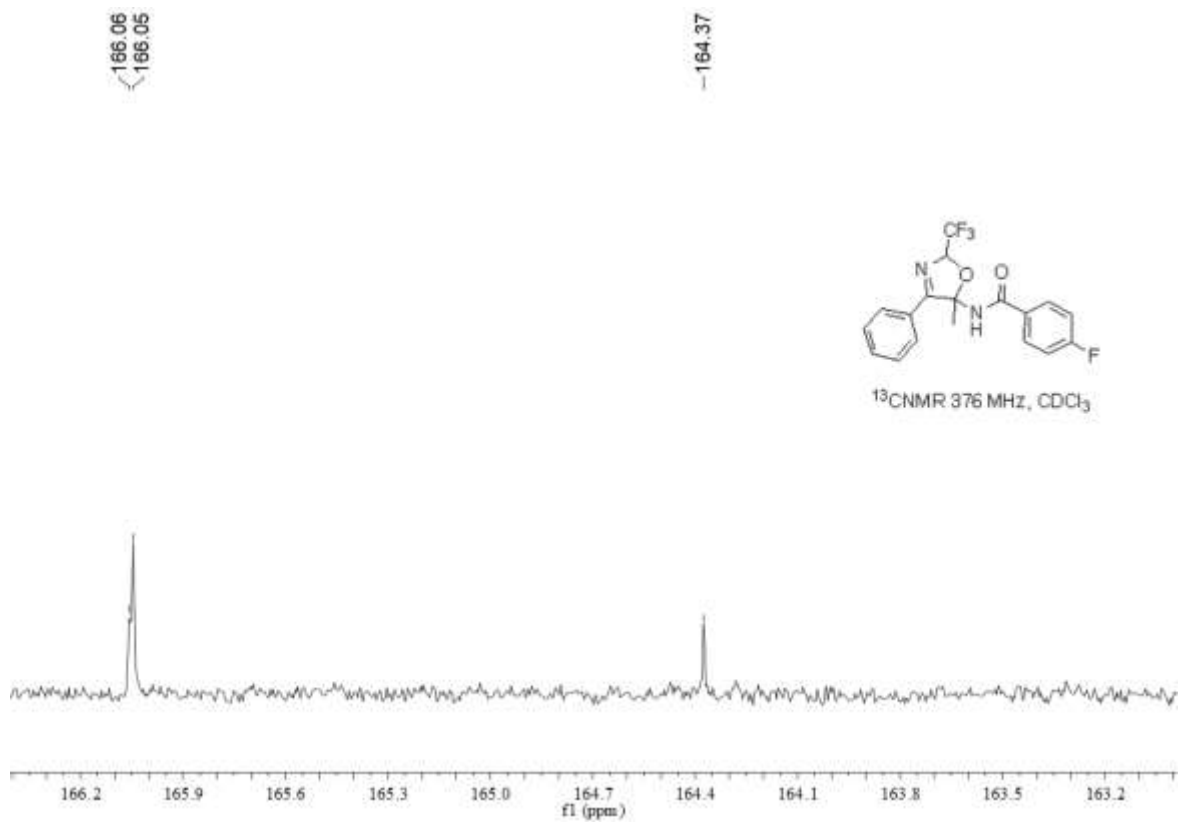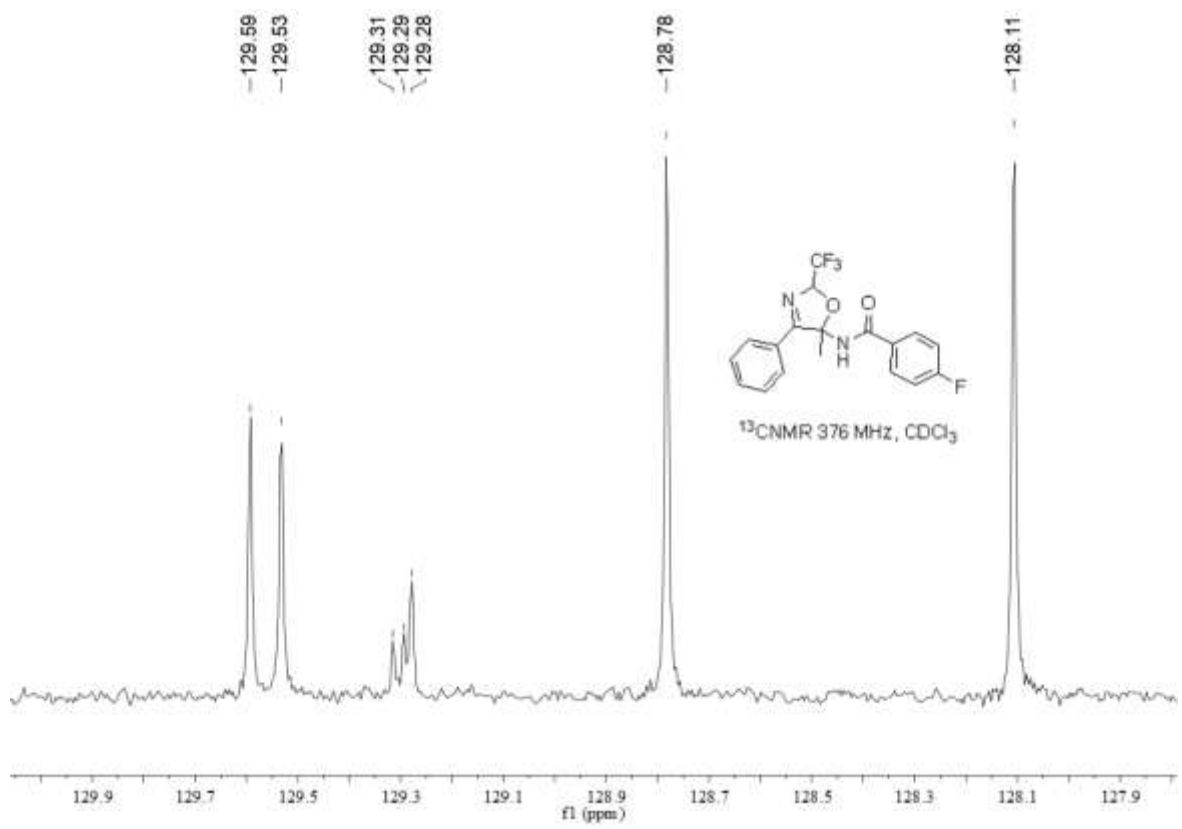

$^{19}\text{F}$  NMR (376 MHz) spectrum of **3j** in  $\text{CDCl}_3$

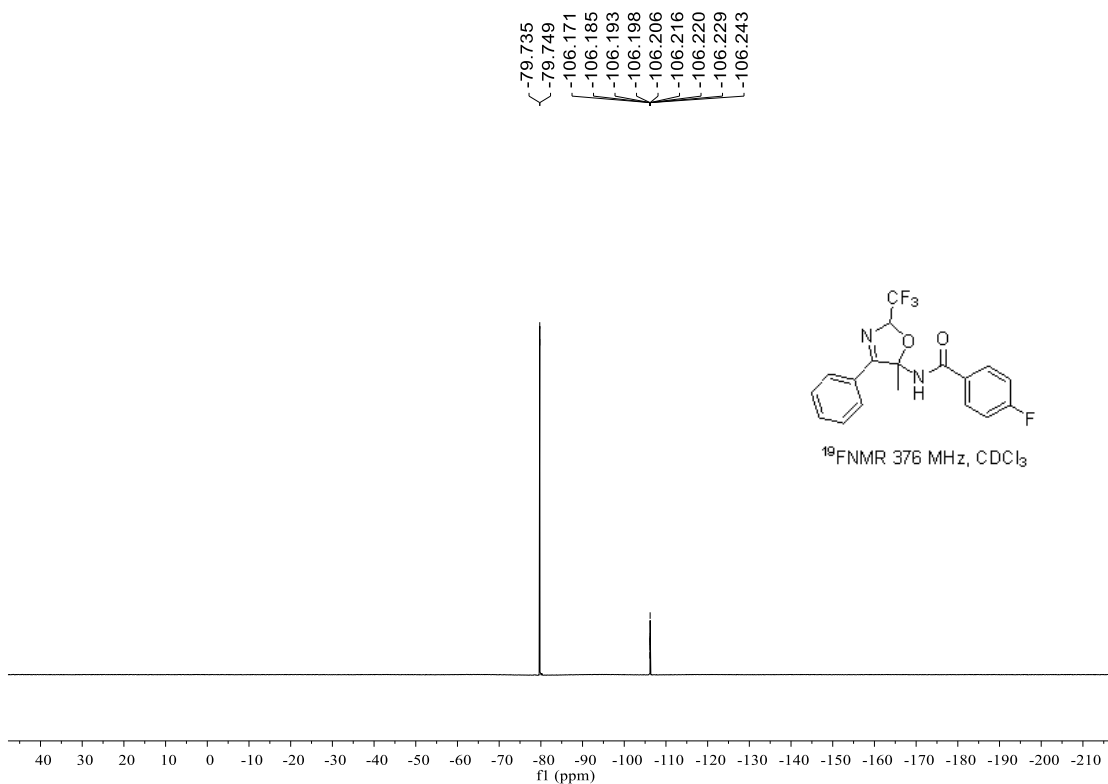

HRMS(ESI) copy of compound **3j**:

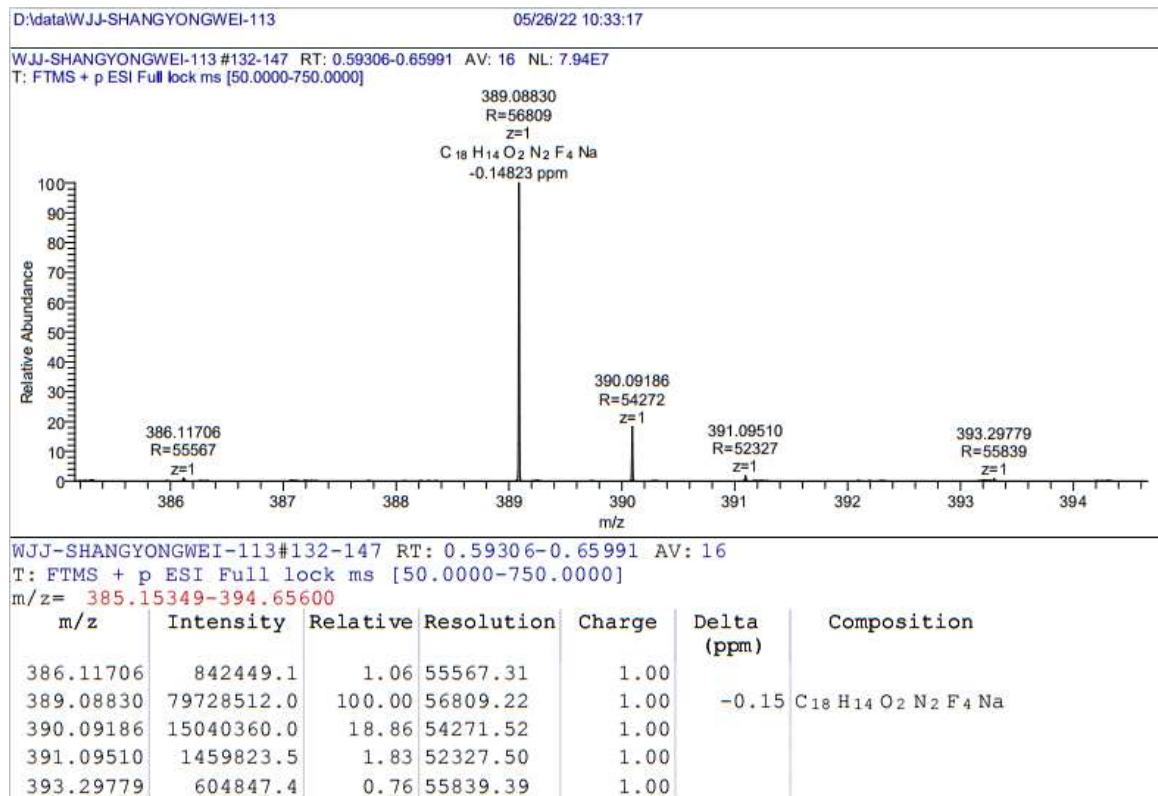

NMR copies of compound **3k**

$^1\text{H}$  NMR (400 MHz) spectrum of **3k** in acetone- $d_6$

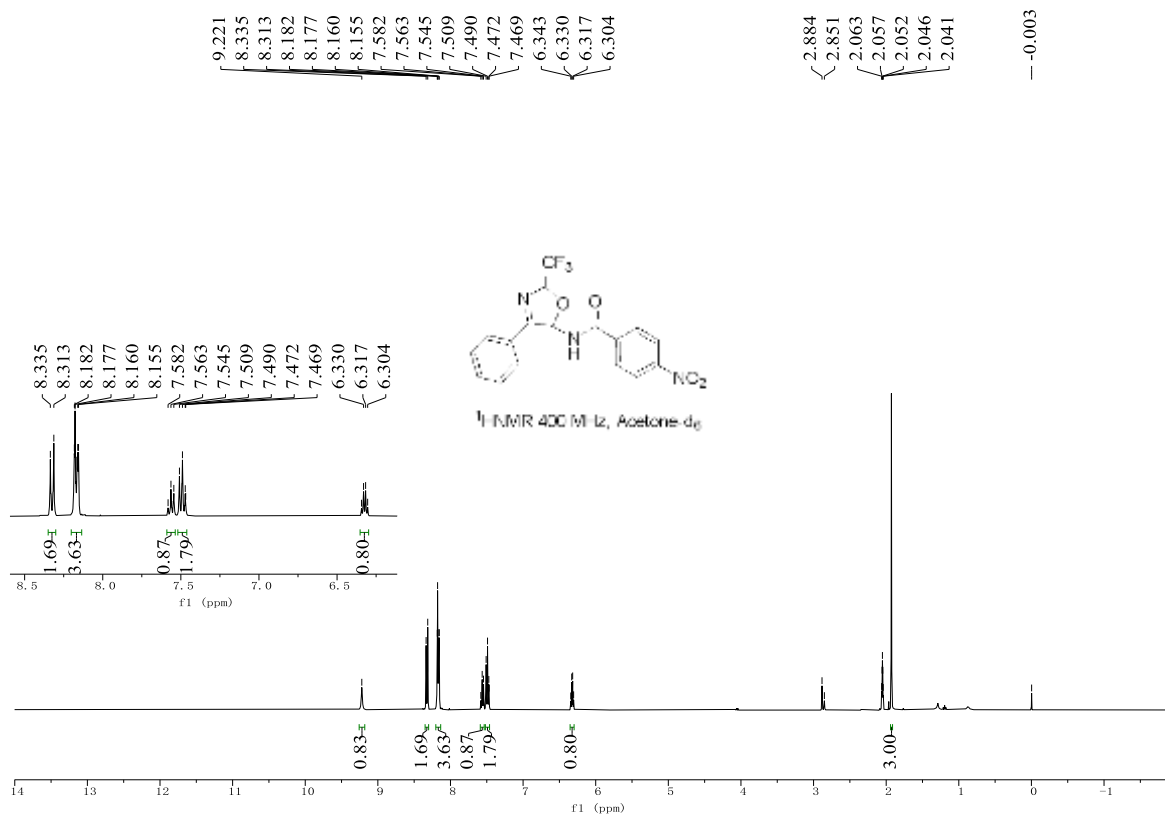

$^{13}\text{C}$  NMR (150 MHz) spectrum of **3k** in acetone- $d_6$

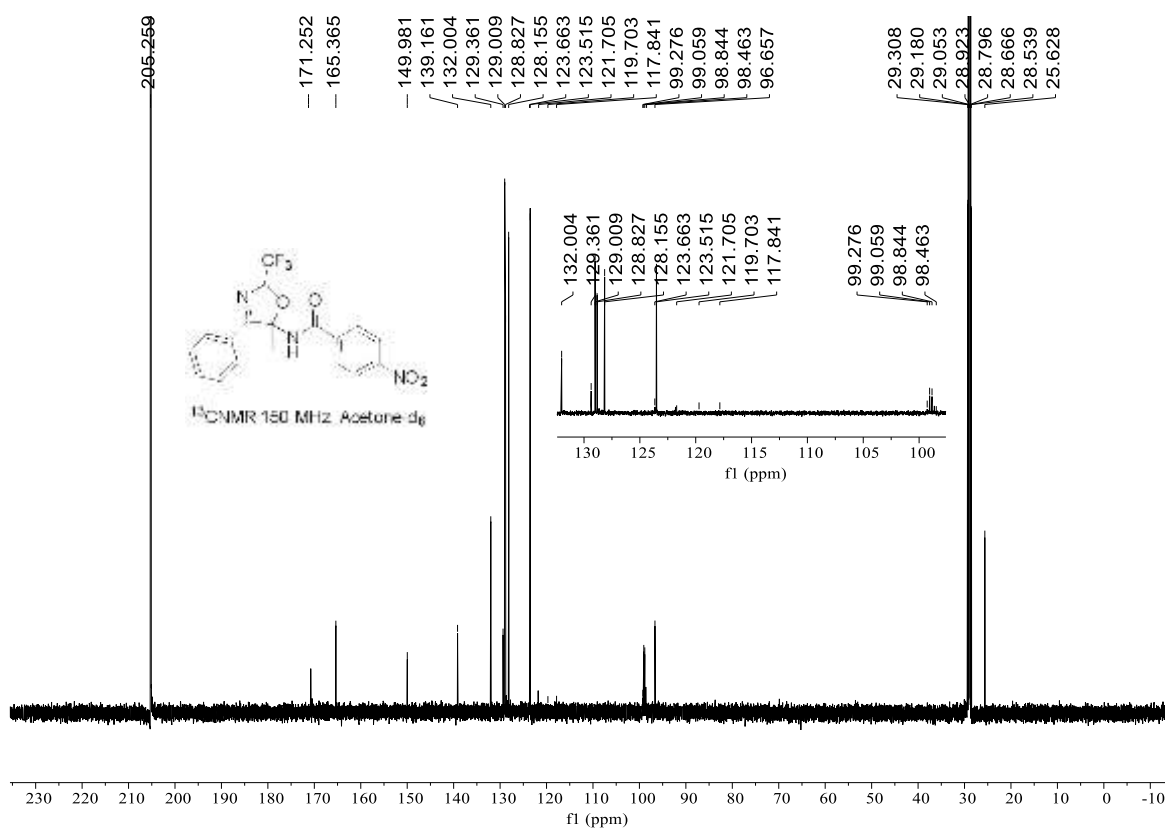



$^{19}\text{F}$  NMR (376 MHz) spectrum of **3k** in acetone- $d_6$

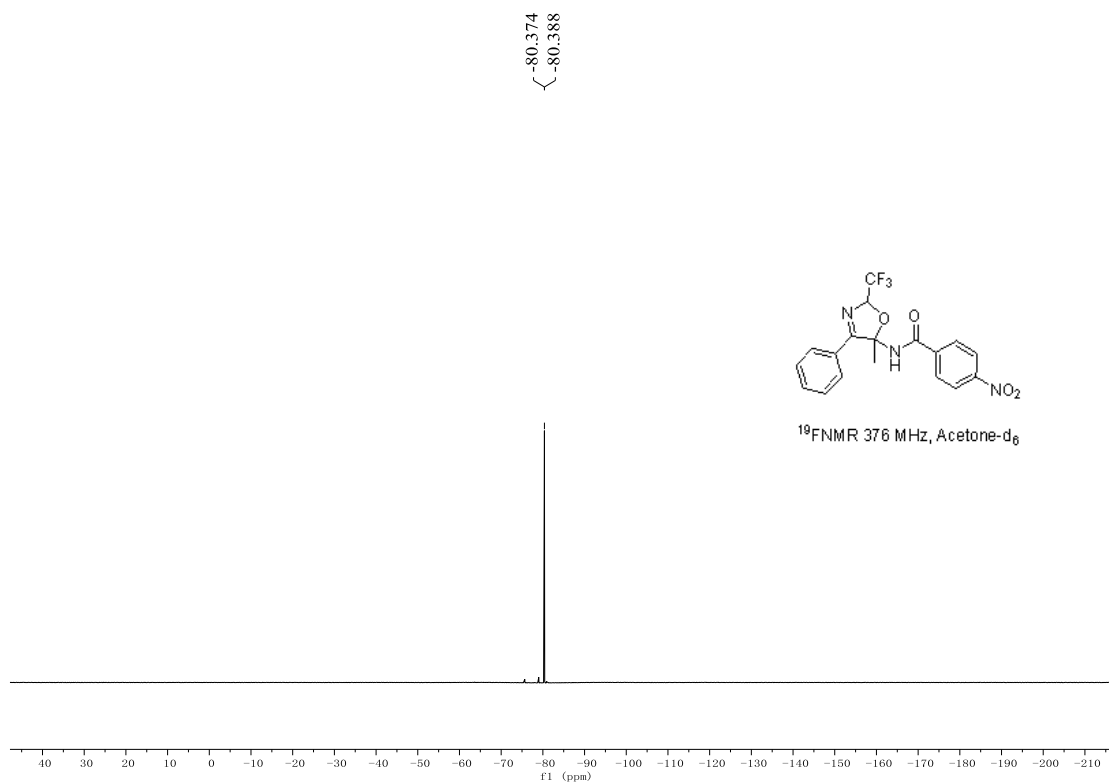

HRMS(ESI) copy of compound **3k**:

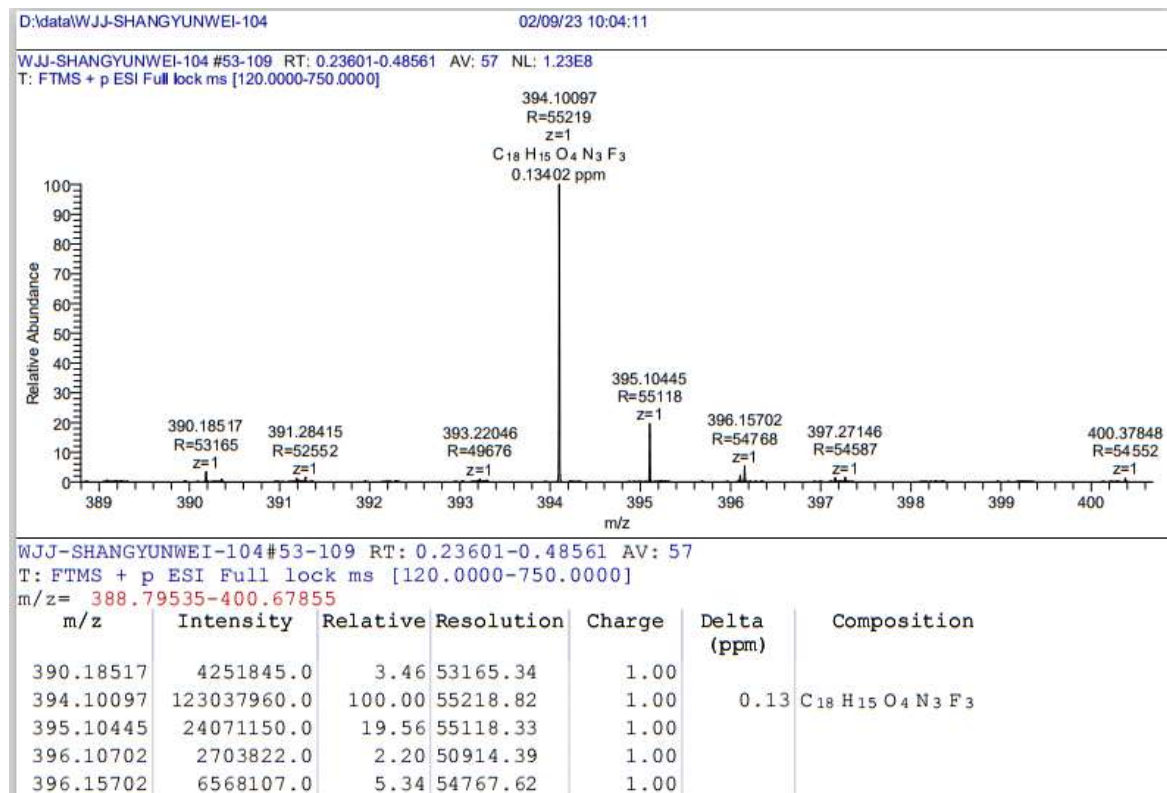

# NMR copies of compound **31**

## <sup>1</sup>H NMR (400 MHz) spectrum of **31** in CDCl<sub>3</sub>

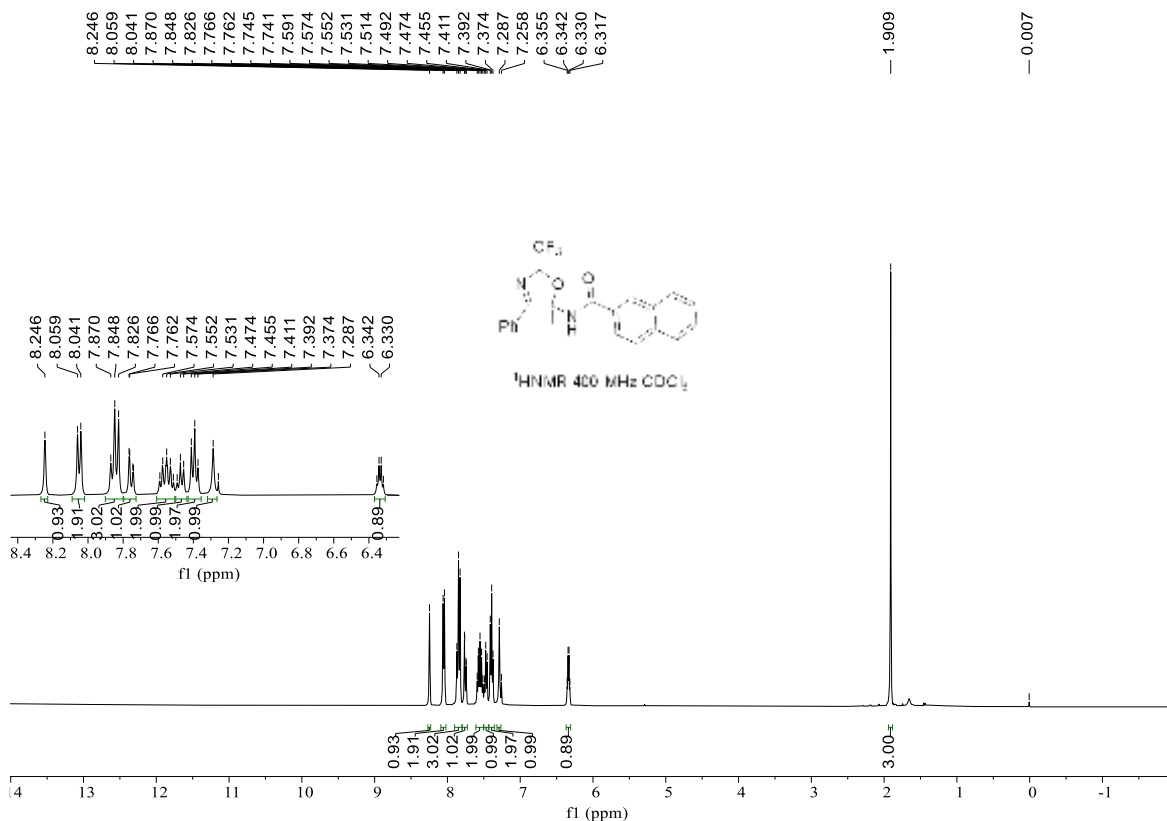

## <sup>13</sup>C NMR (150 MHz) spectrum of **31** in CDCl<sub>3</sub>

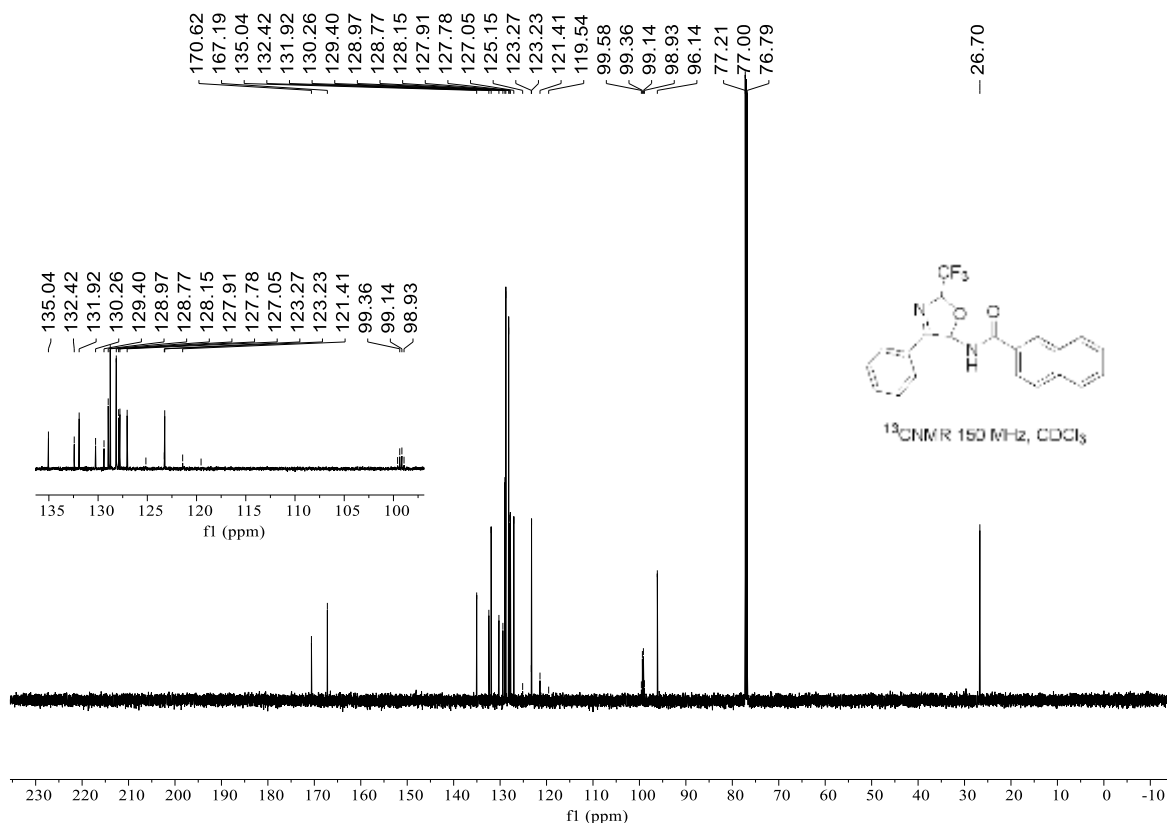

$^{19}\text{F}$  NMR (376 MHz) spectrum of **3I** in  $\text{CDCl}_3$

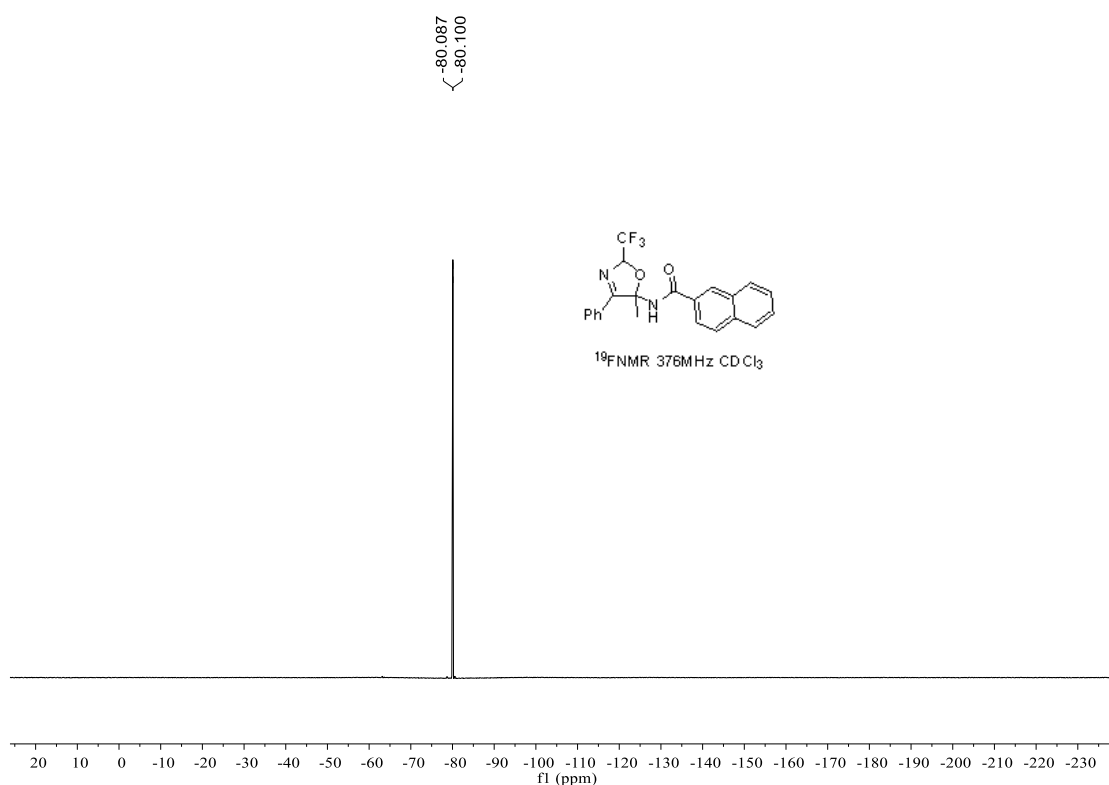

HRMS(ESI) copy of compound **3I**:

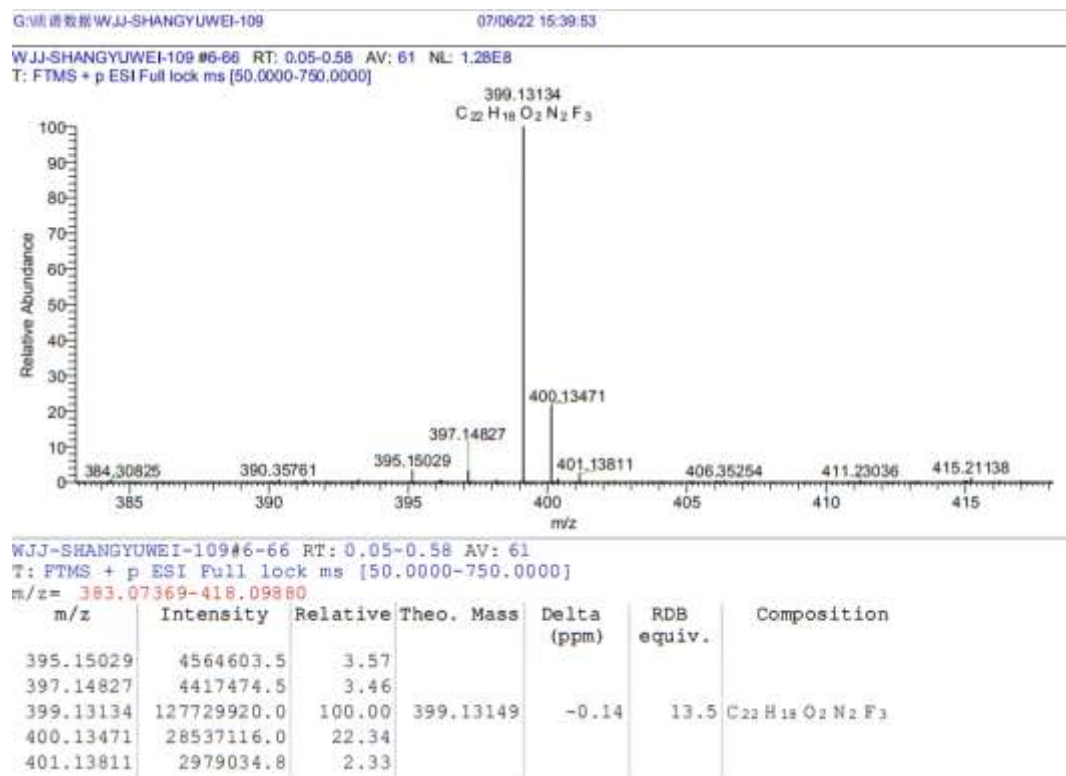

NMR copies of compound **3m**

<sup>1</sup>H NMR (400 MHz) spectrum of **3m** in CDCl<sub>3</sub>

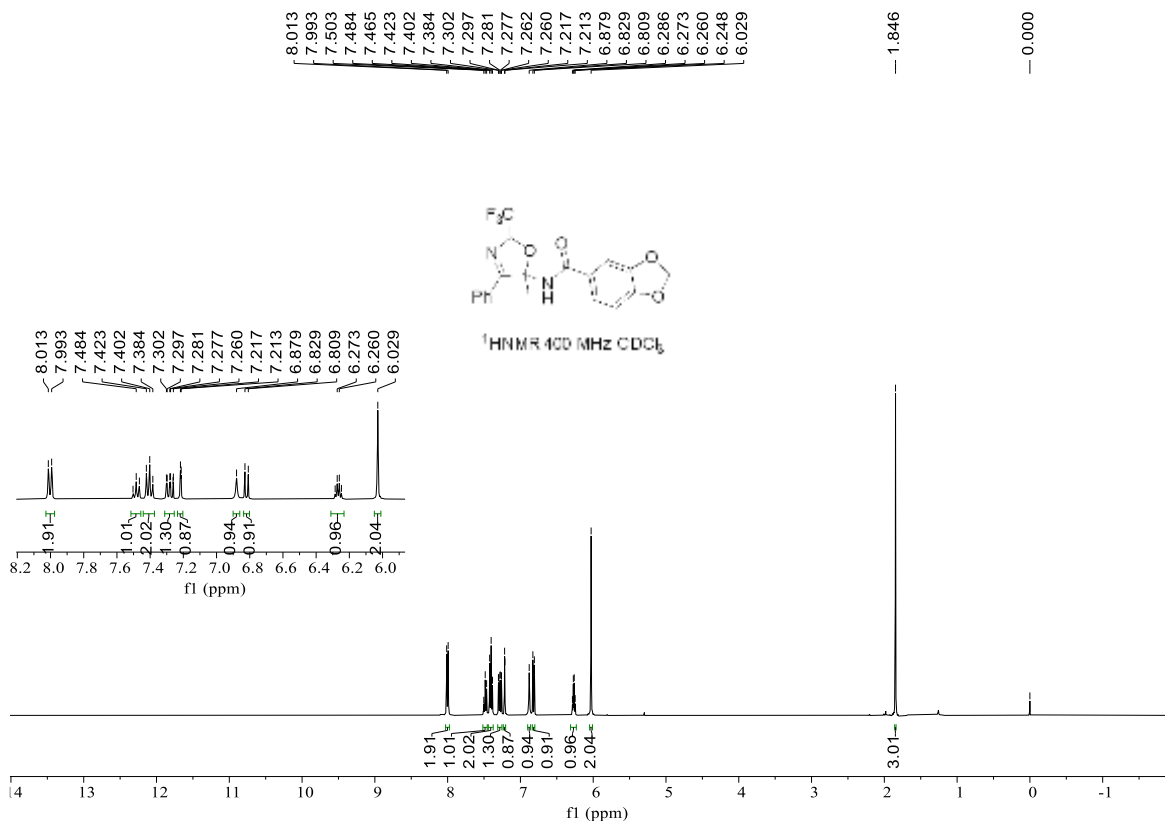

<sup>13</sup>C NMR (150 MHz) spectrum of **3m** in CDCl<sub>3</sub>

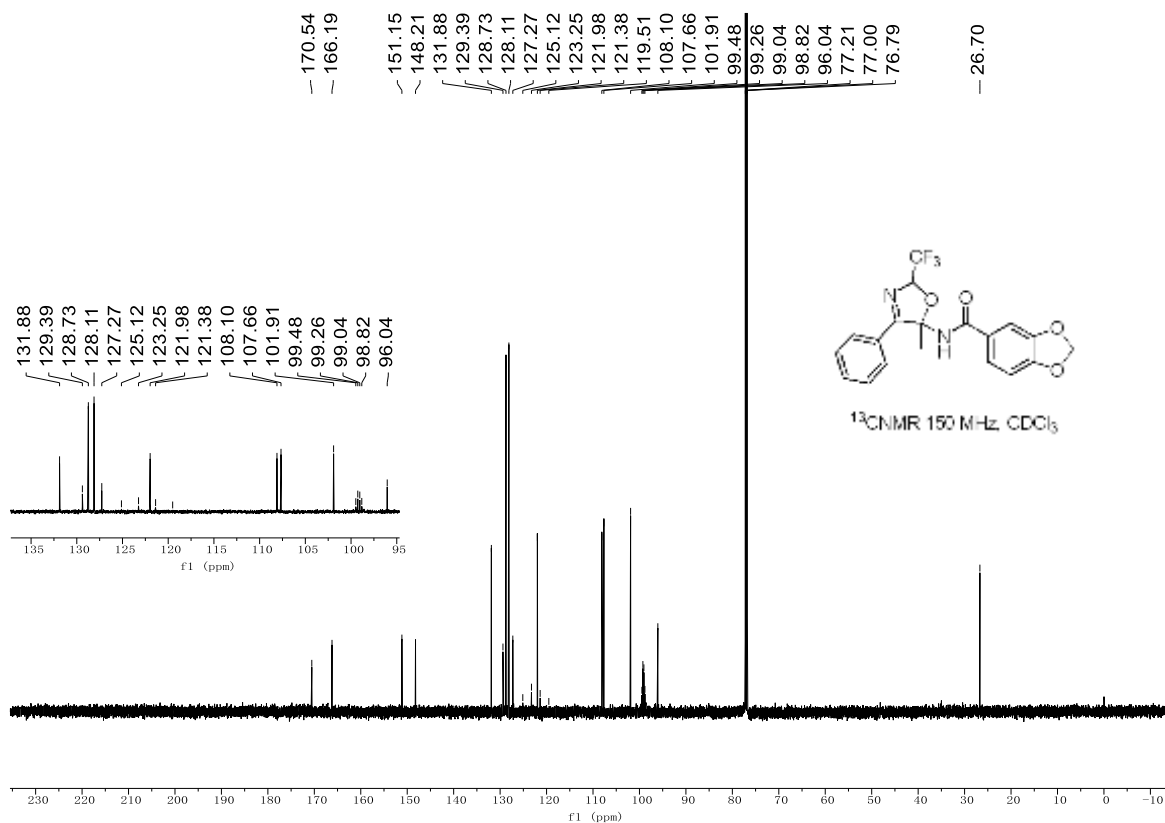

$^{19}\text{F}$  NMR (376 MHz) spectrum of **3m** in  $\text{CDCl}_3$

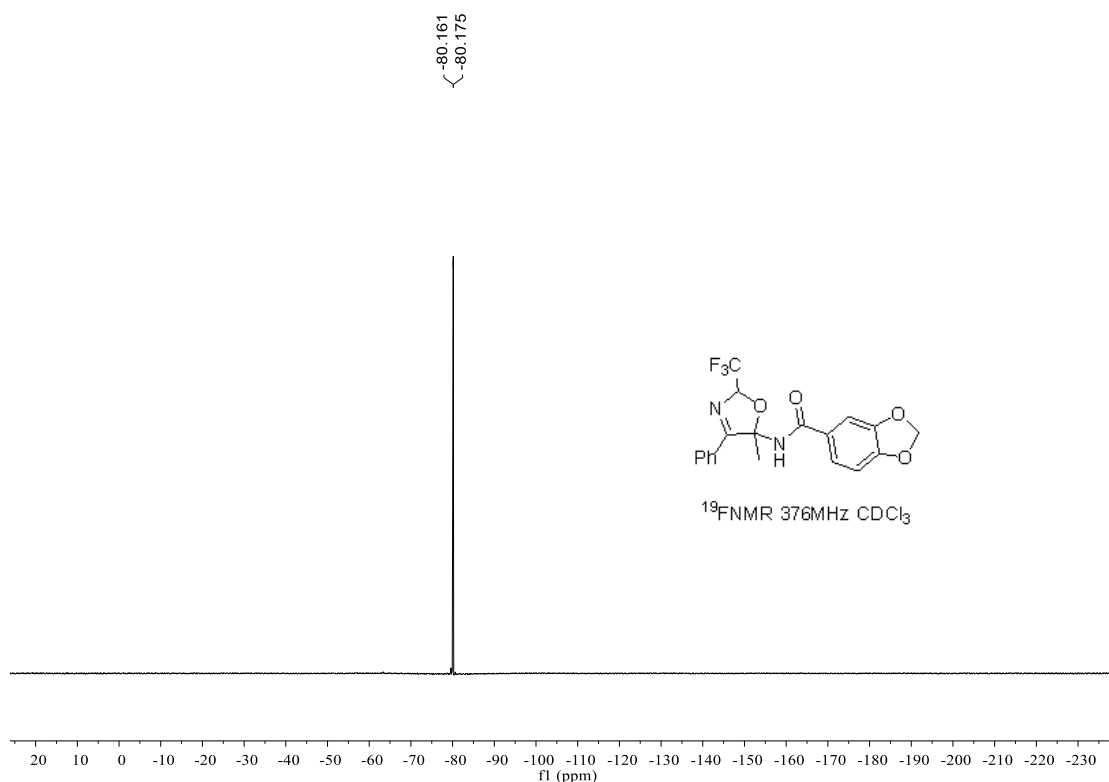

HRMS(ESI) copy of compound **3m**:

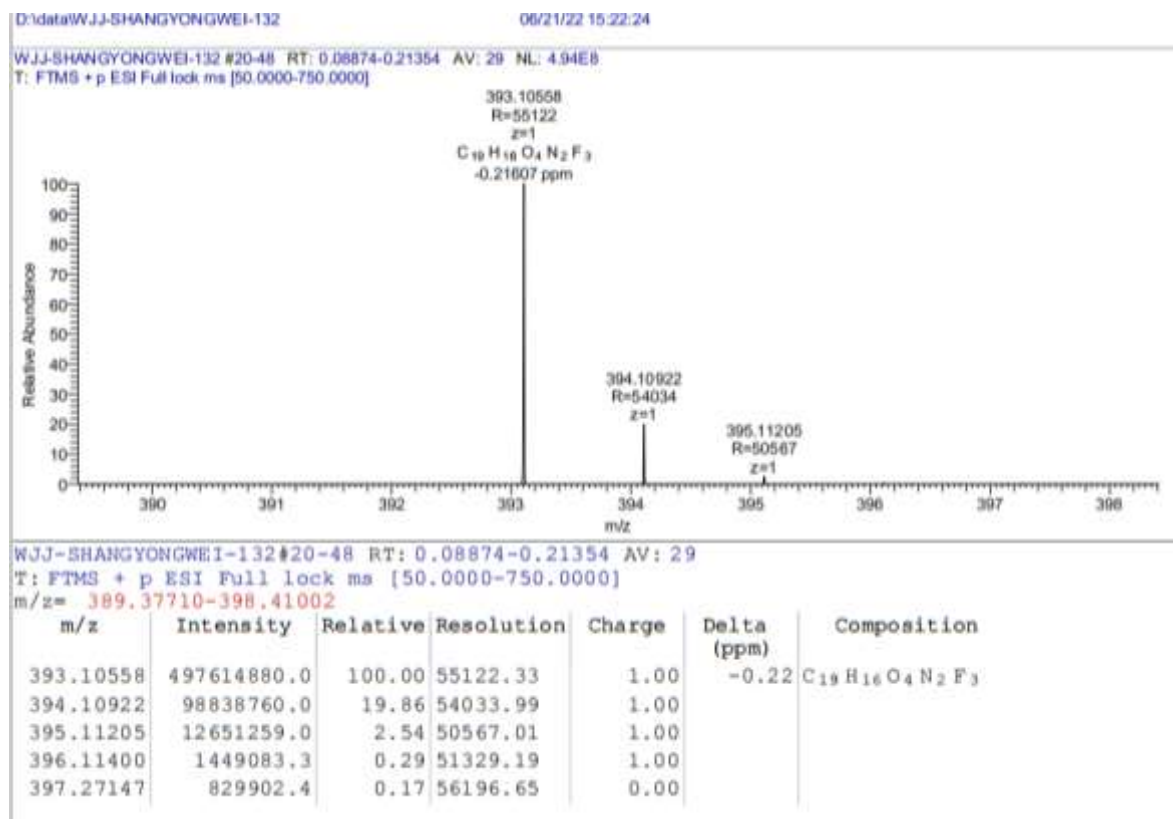

NMR copies of compound **3n**

$^1\text{H}$  NMR (400 MHz) spectrum of **3n** in  $\text{CDCl}_3$

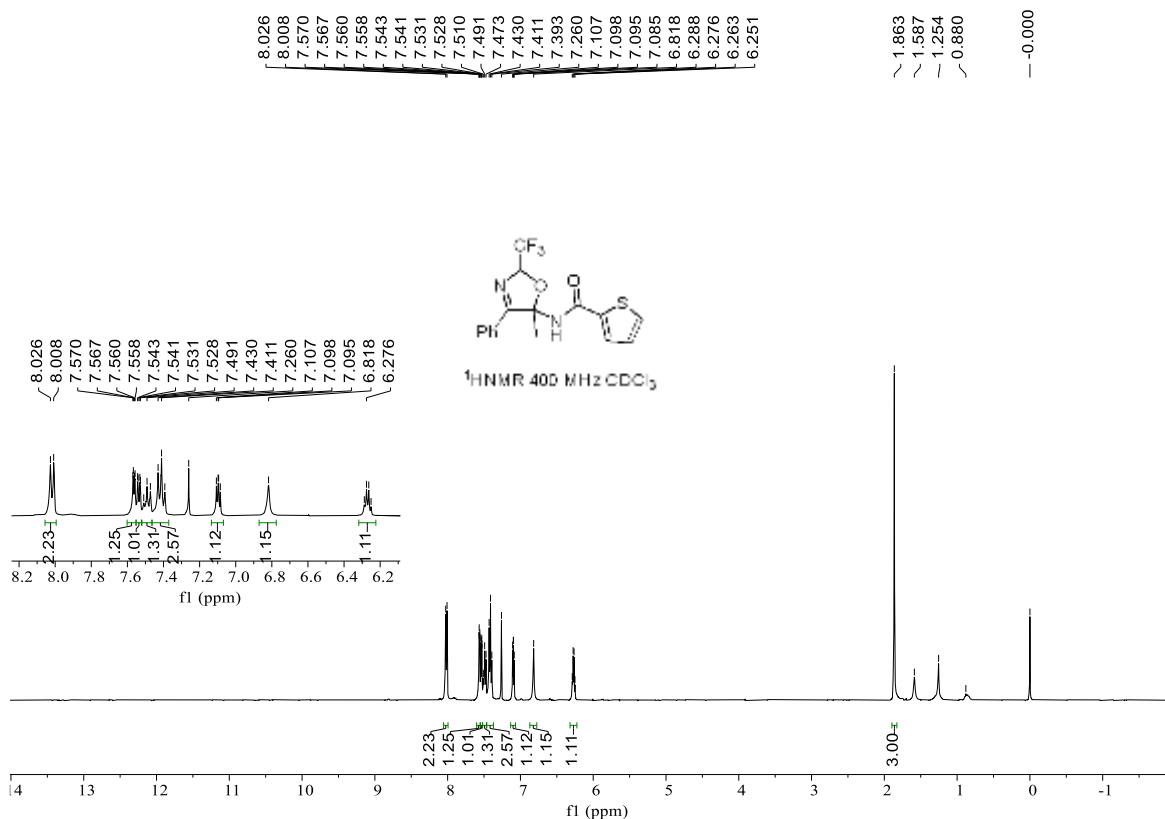

$^{13}\text{C}$  NMR (150 MHz) spectrum of **3n** in  $\text{CDCl}_3$

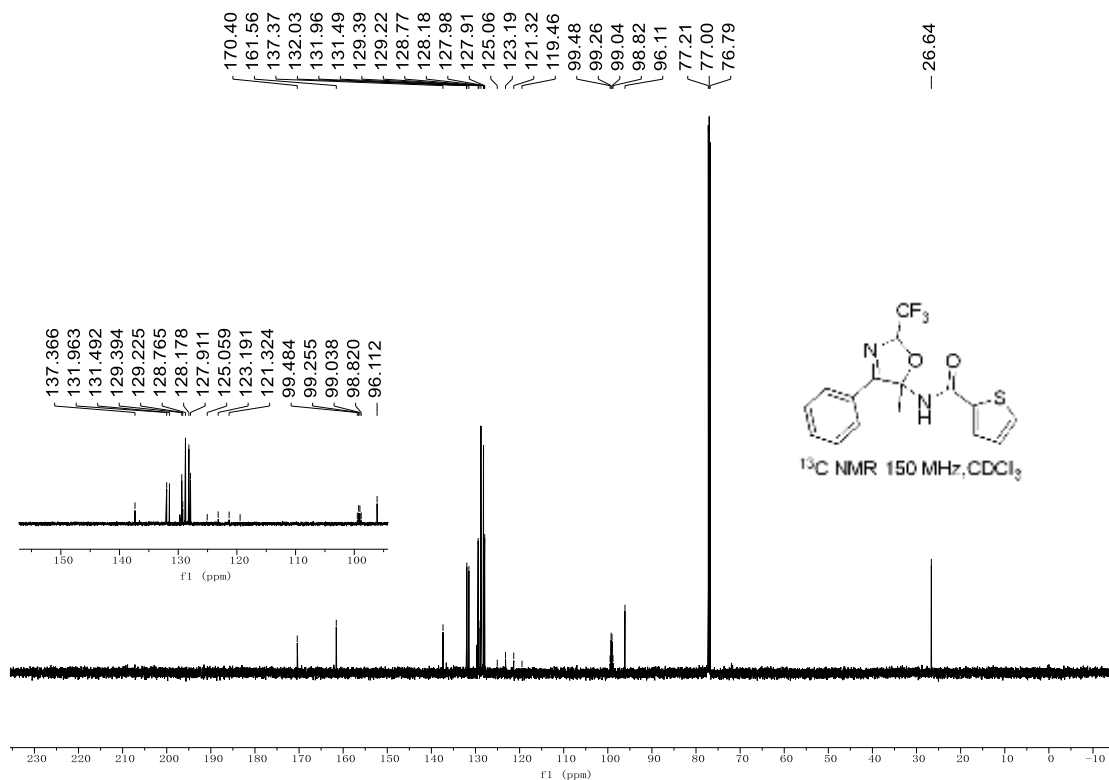

$^{19}\text{F}$  NMR (376 MHz) spectrum of **3n** in  $\text{CDCl}_3$

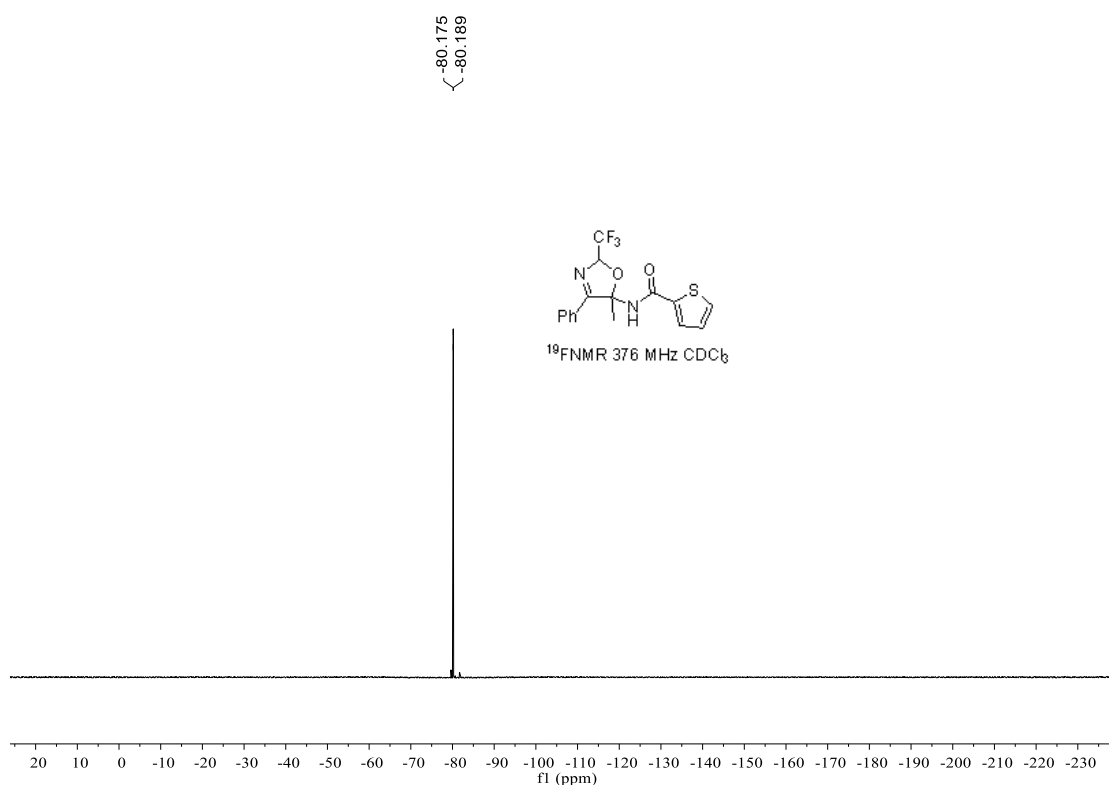

HRMS(ESI) copy of compound **3n**:

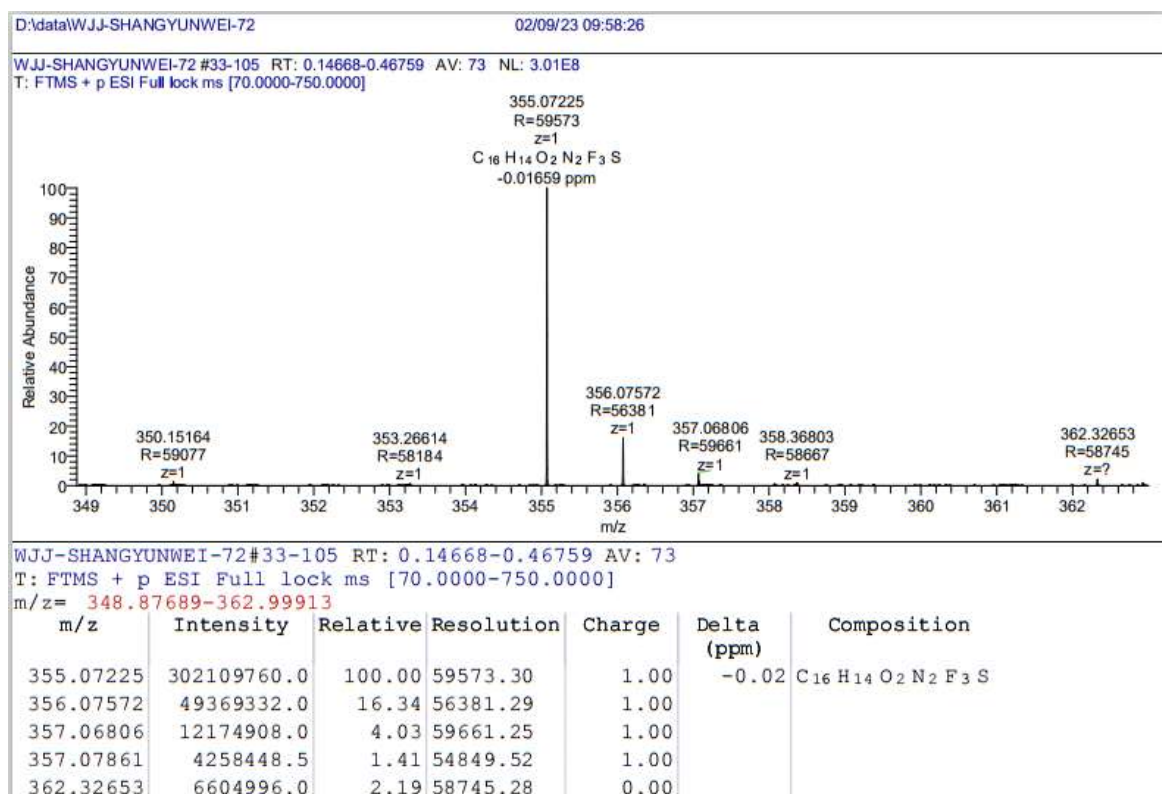

NMR copies of compound **3o**

$^1\text{H}$  NMR (400 MHz) spectrum of **3o** in acetone- $d_6$

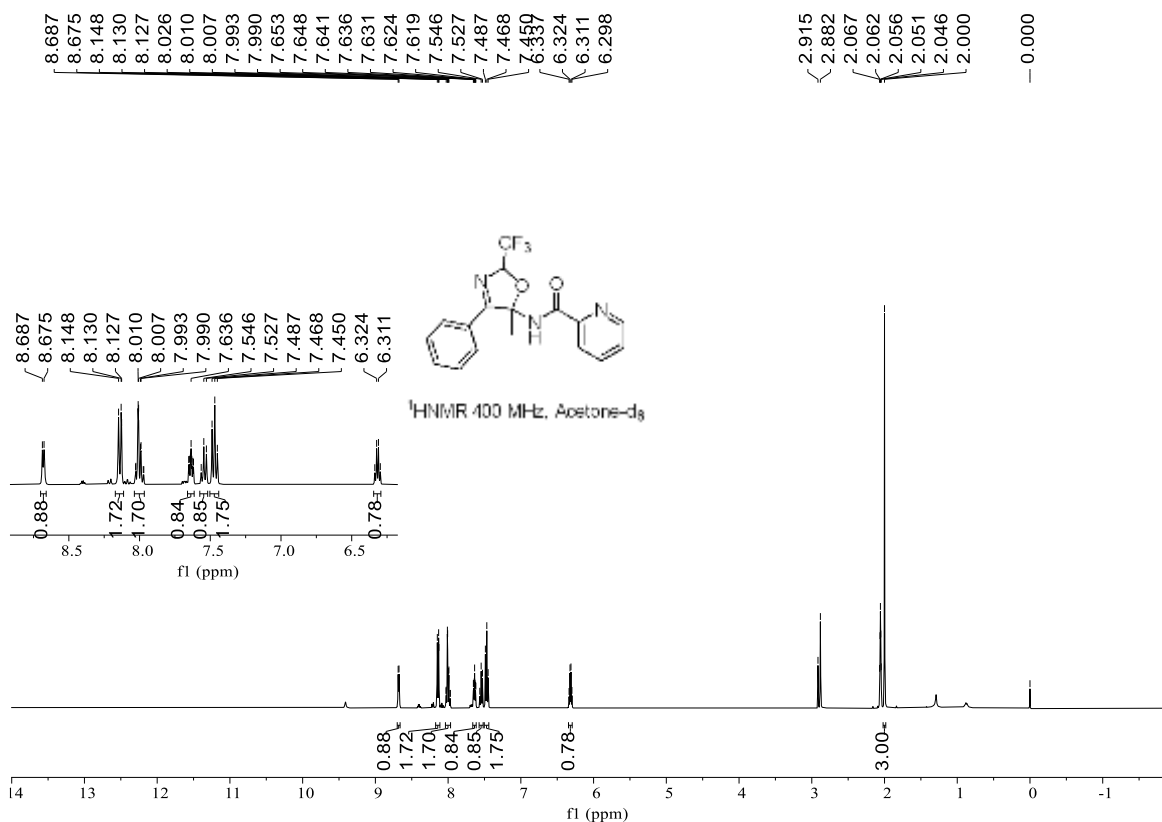

$^{13}\text{C}$  NMR (150 MHz) spectrum of **3o** in acetone- $d_6$

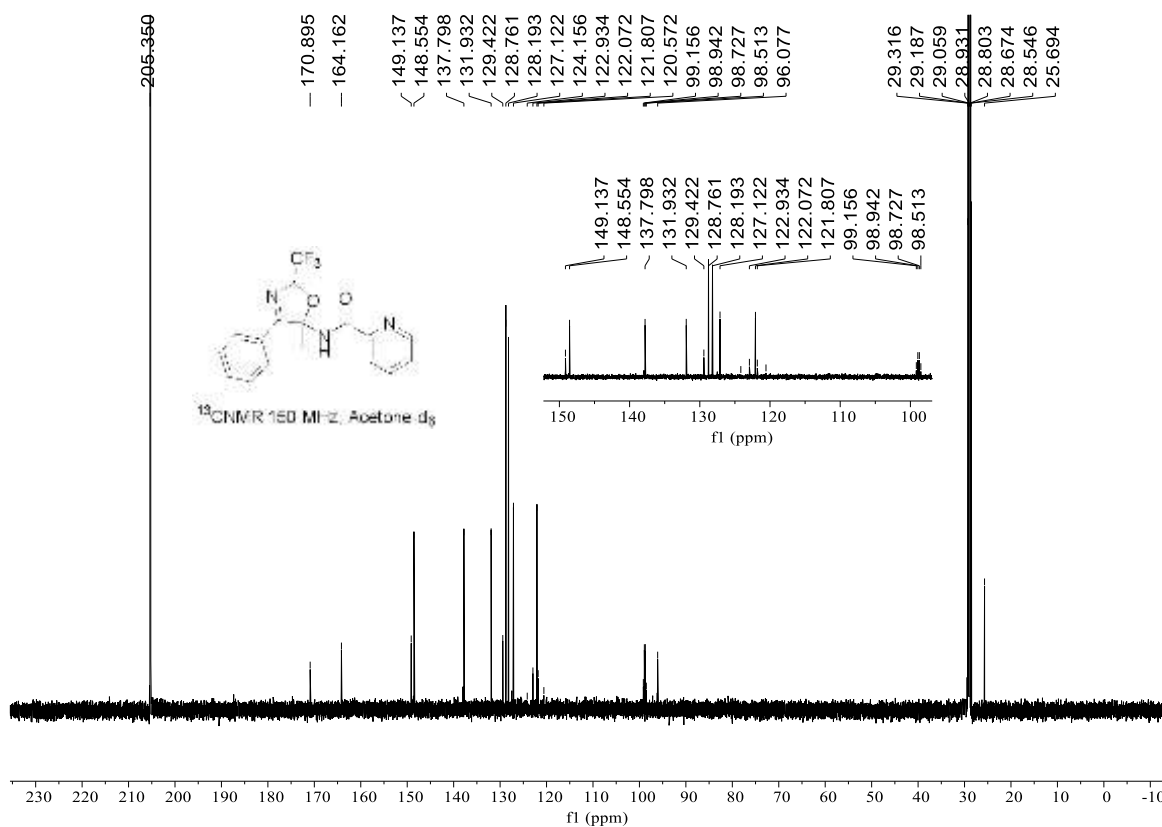



$^{19}\text{F}$  NMR (376 MHz) spectrum of **3o** in acetone- $d_6$

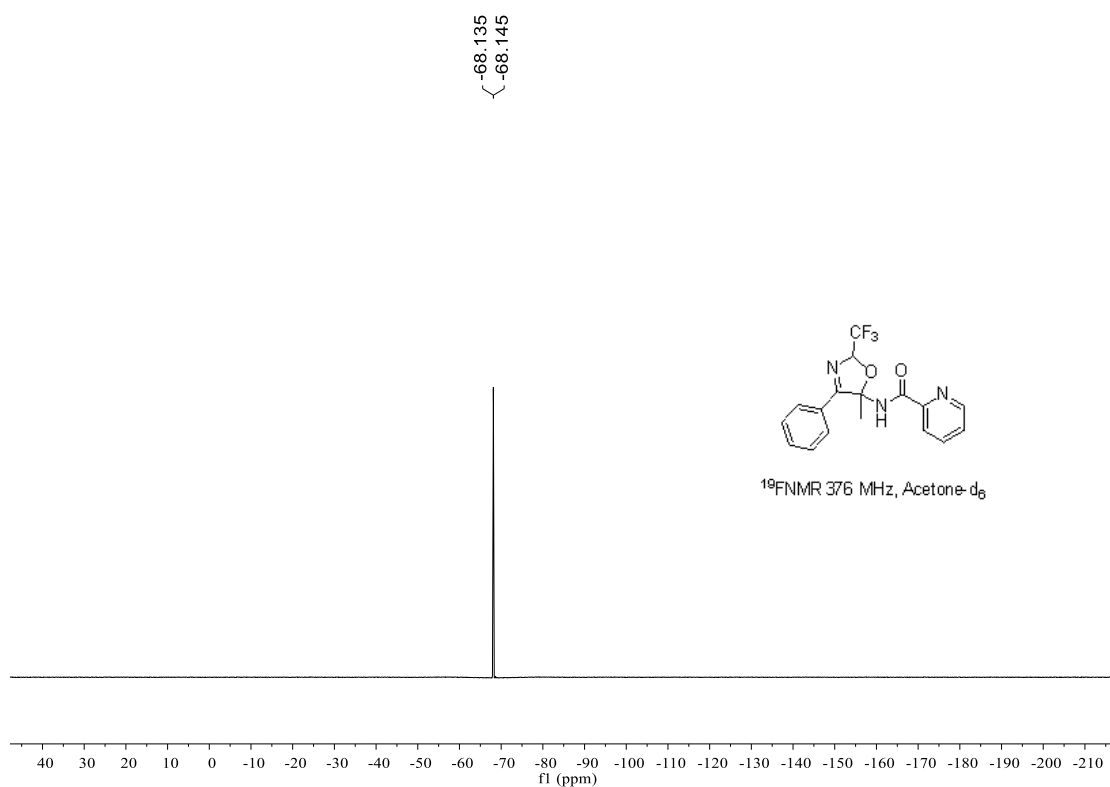

HRMS(ESI) copy of compound **3o**:

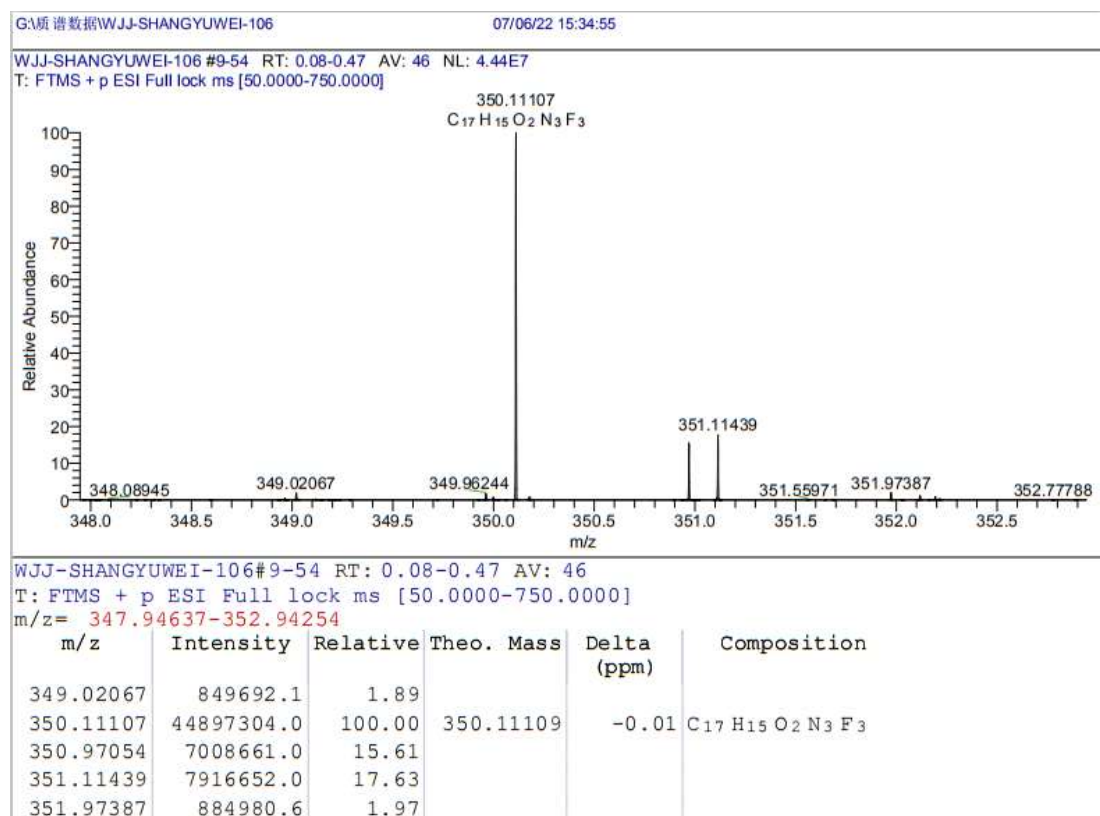

NMR copies of compound **3q**

$^1\text{H}$  NMR (400 MHz) spectrum of **3q** in  $\text{CDCl}_3$

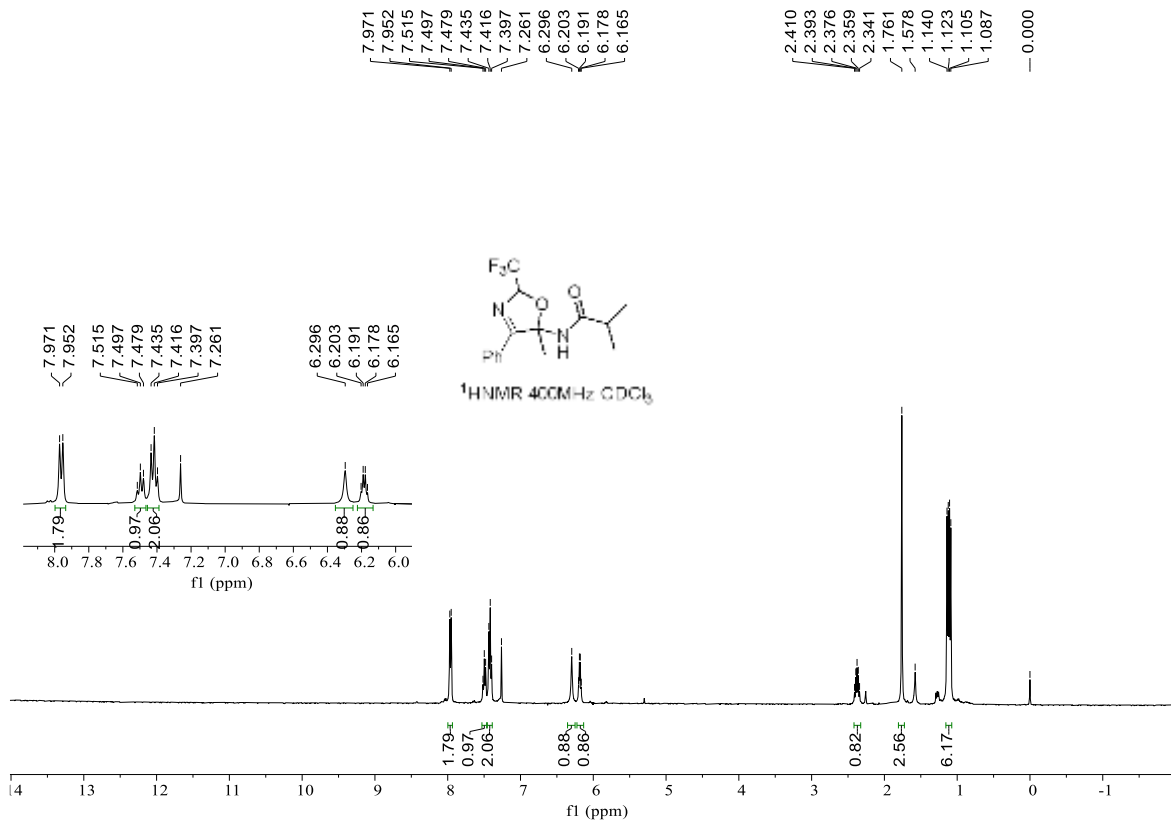

$^{13}\text{C}$  NMR (150 MHz) spectrum of **3r** in  $\text{CDCl}_3$

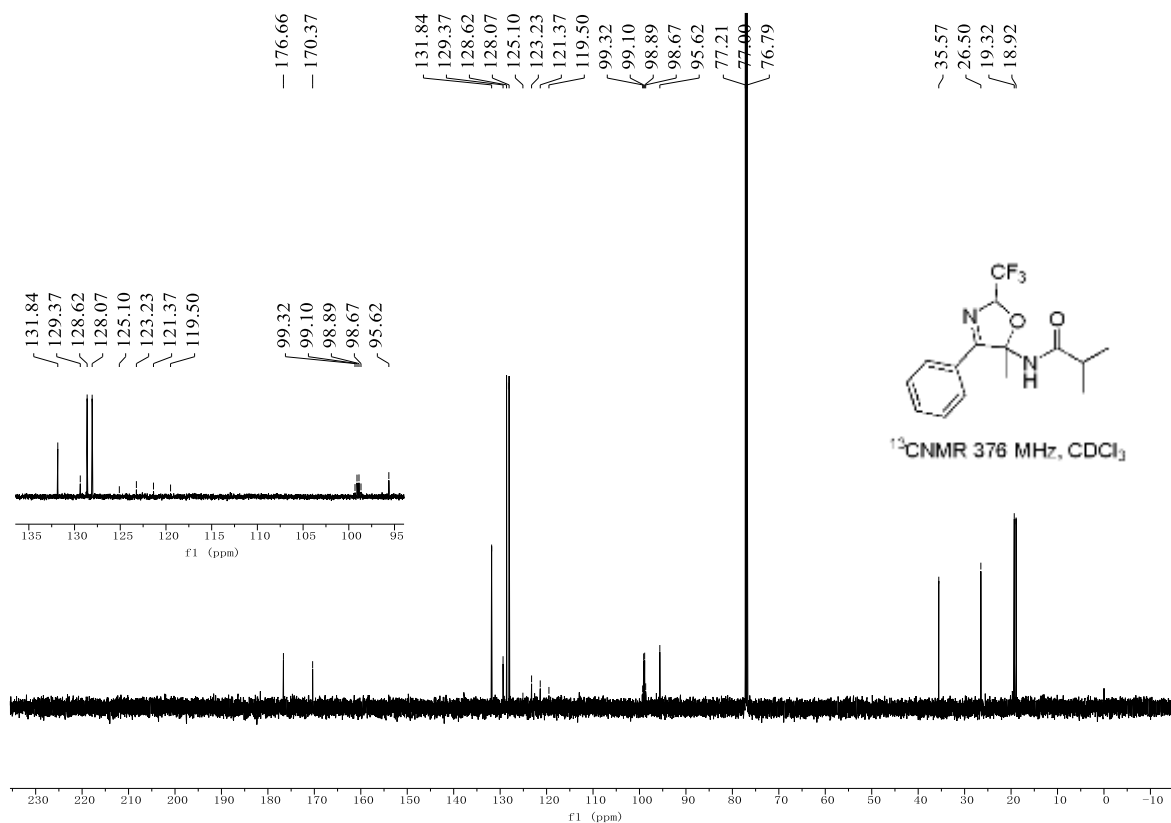

$^{19}\text{F}$  NMR (376 MHz) spectrum of **3q** in  $\text{CDCl}_3$

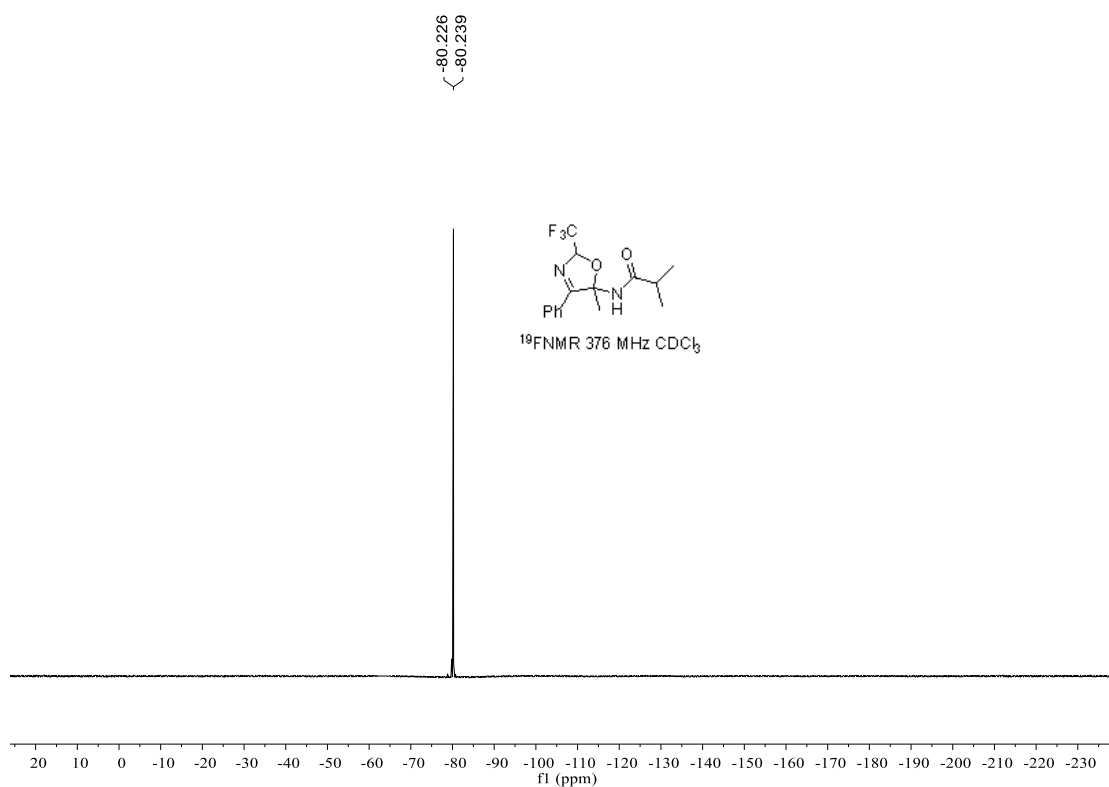

HRMS(ESI) copy of compound **3q**:

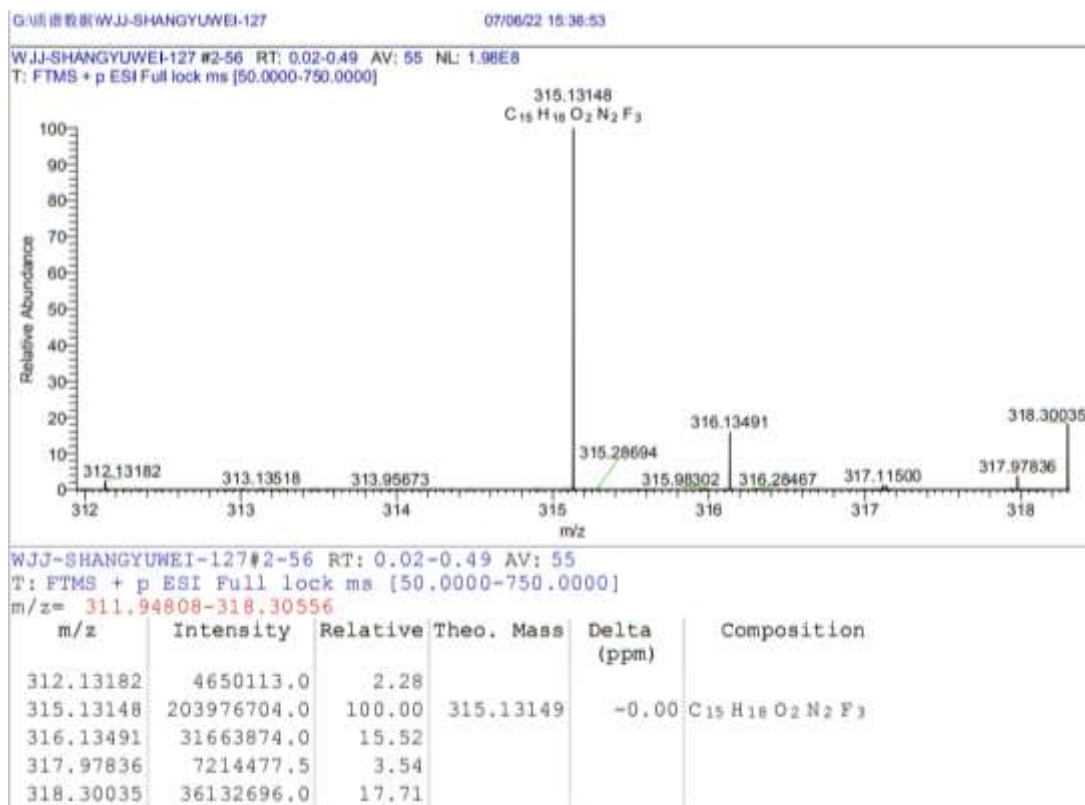

NMR copies of compound **3r**

$^1\text{H}$  NMR (400 MHz) spectrum of **3r** in  $\text{CDCl}_3$

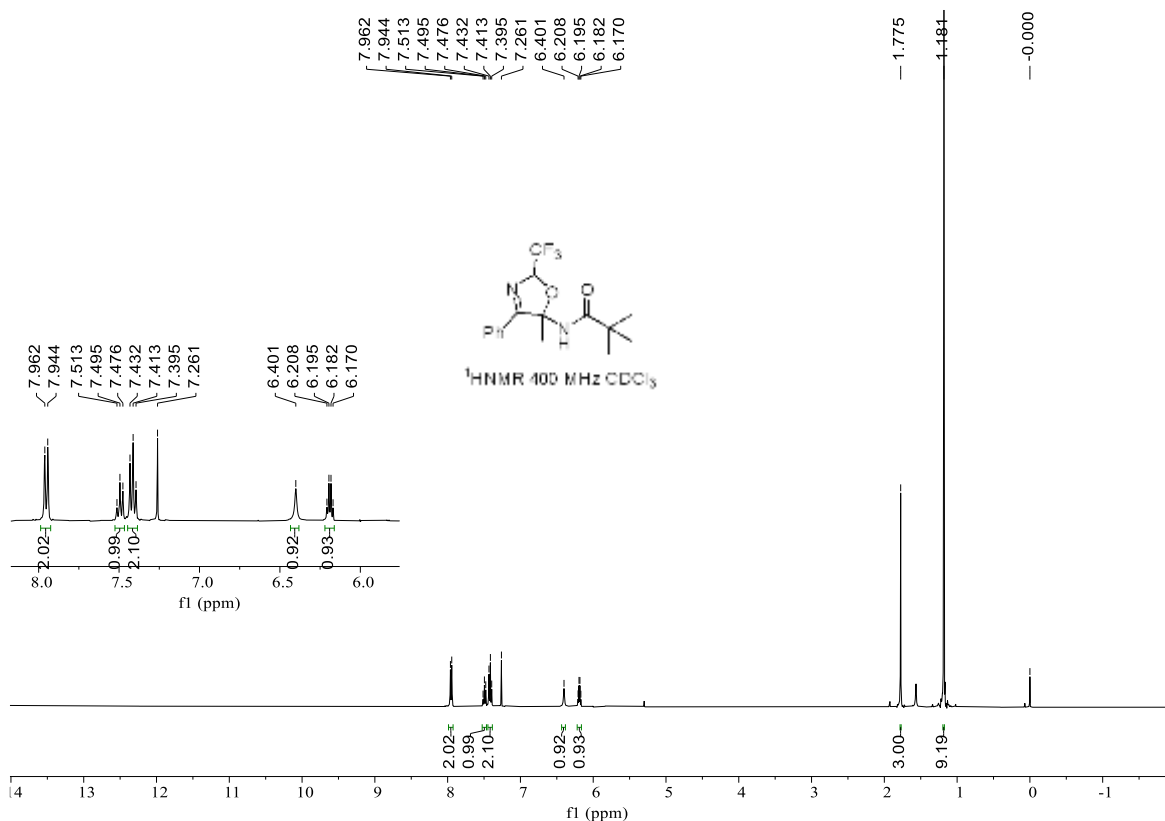

$^{13}\text{C}$  NMR (150 MHz) spectrum of **3r** in  $\text{CDCl}_3$

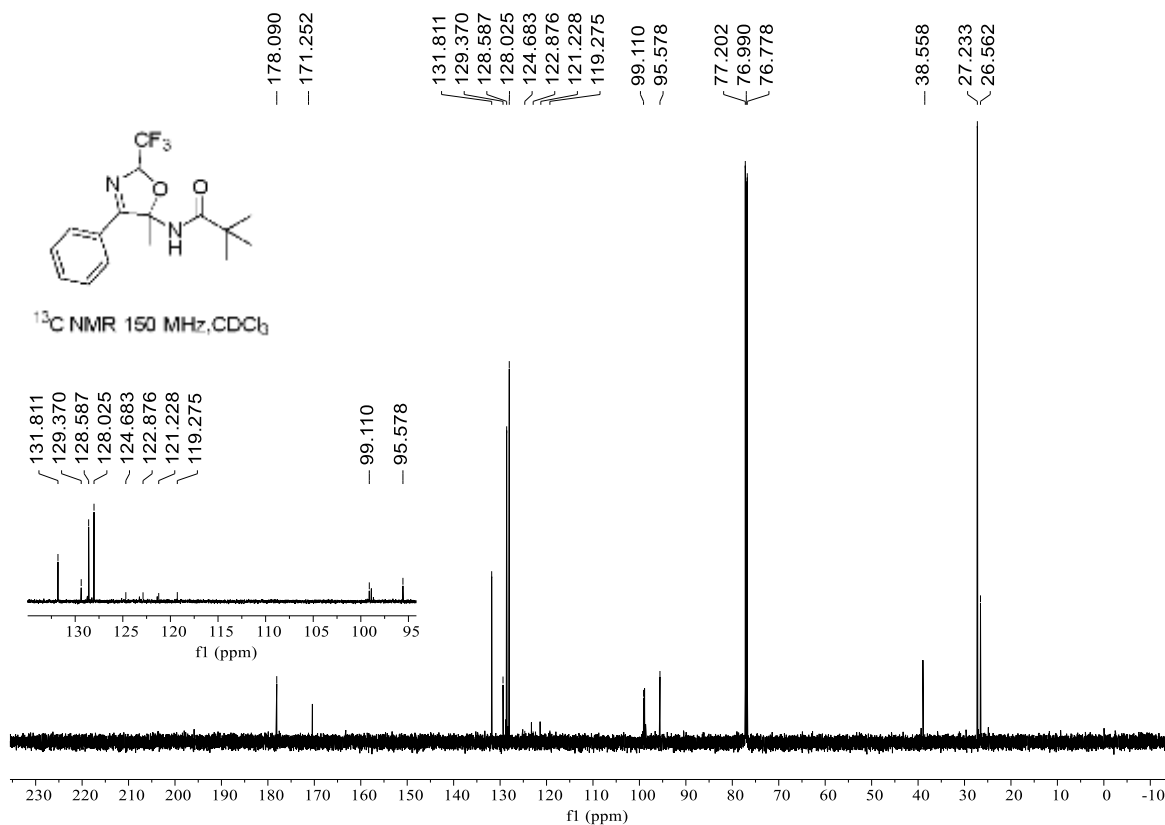

$^{19}\text{F}$  NMR (376 MHz) spectrum of **3r** in  $\text{CDCl}_3$

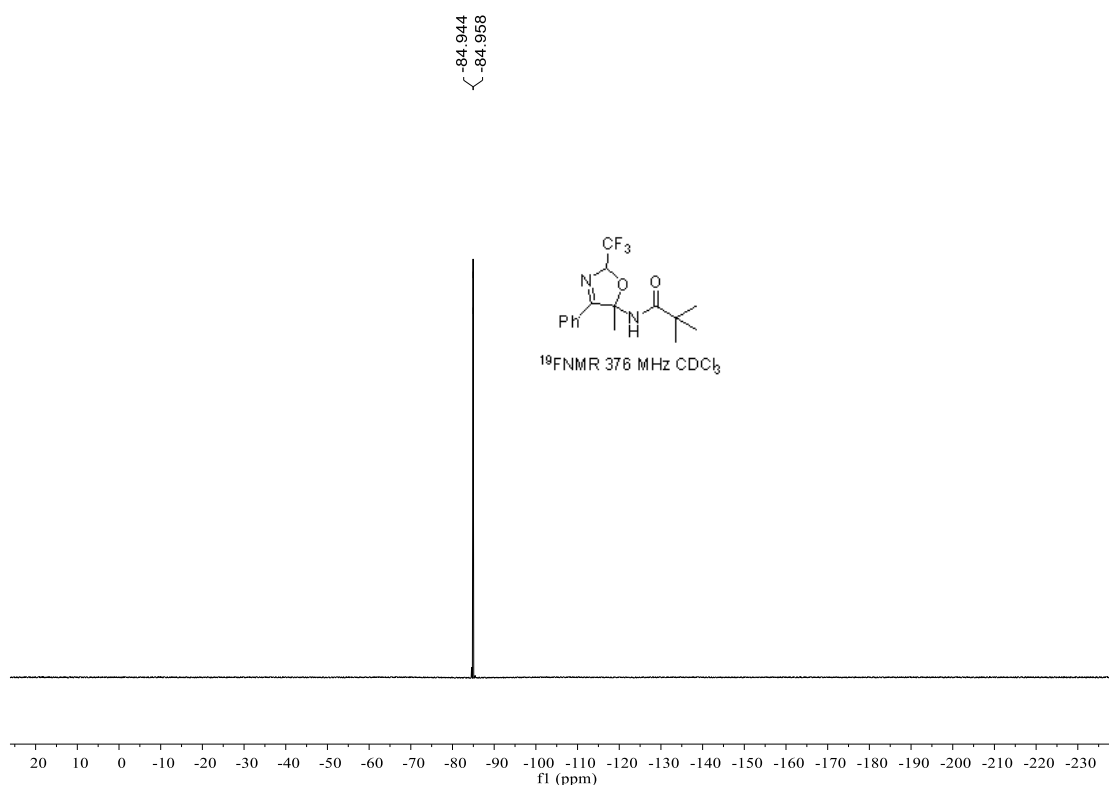

HRMS(ESI) copy of compound **3r**:

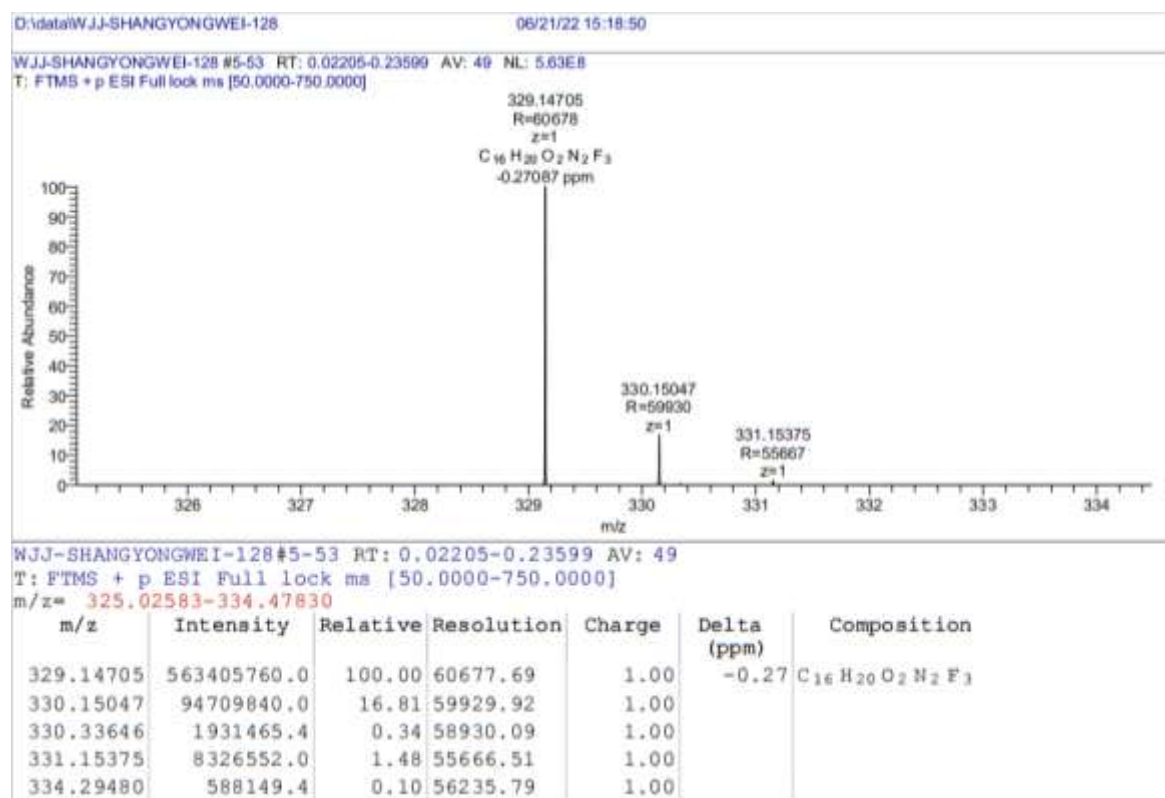

# NMR copies of compound **3s**

## <sup>1</sup>H NMR (400 MHz) spectrum of **3s** in CDCl<sub>3</sub>

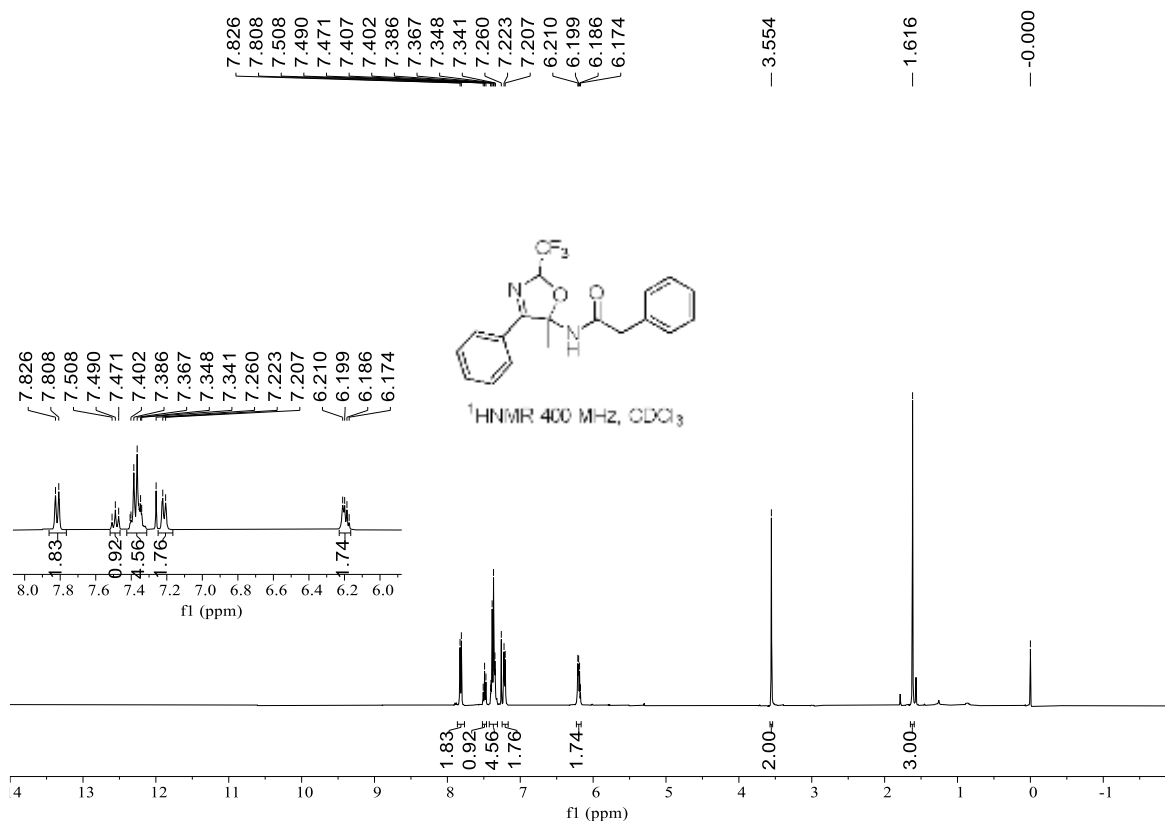

## <sup>13</sup>C NMR (150 MHz) spectrum of **3s** in CDCl<sub>3</sub>

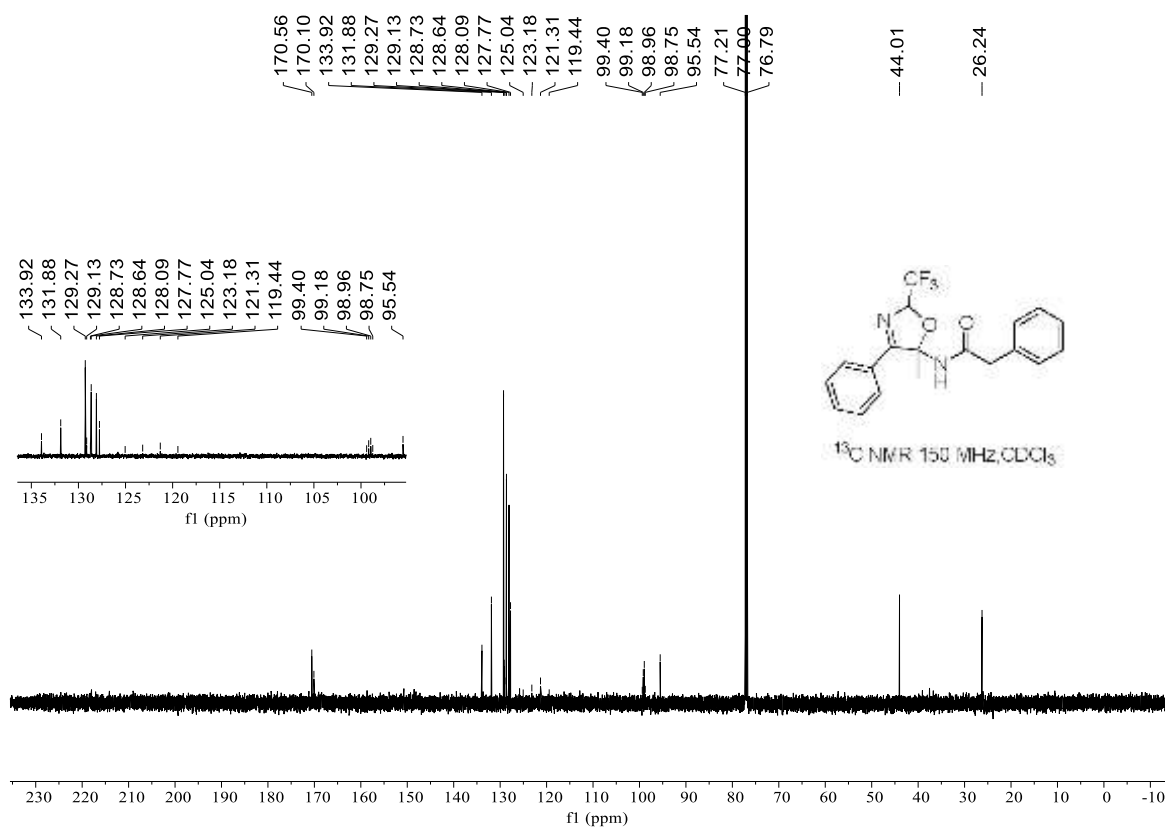

$^{19}\text{F}$  NMR (376 MHz) spectrum of **3s** in  $\text{CDCl}_3$

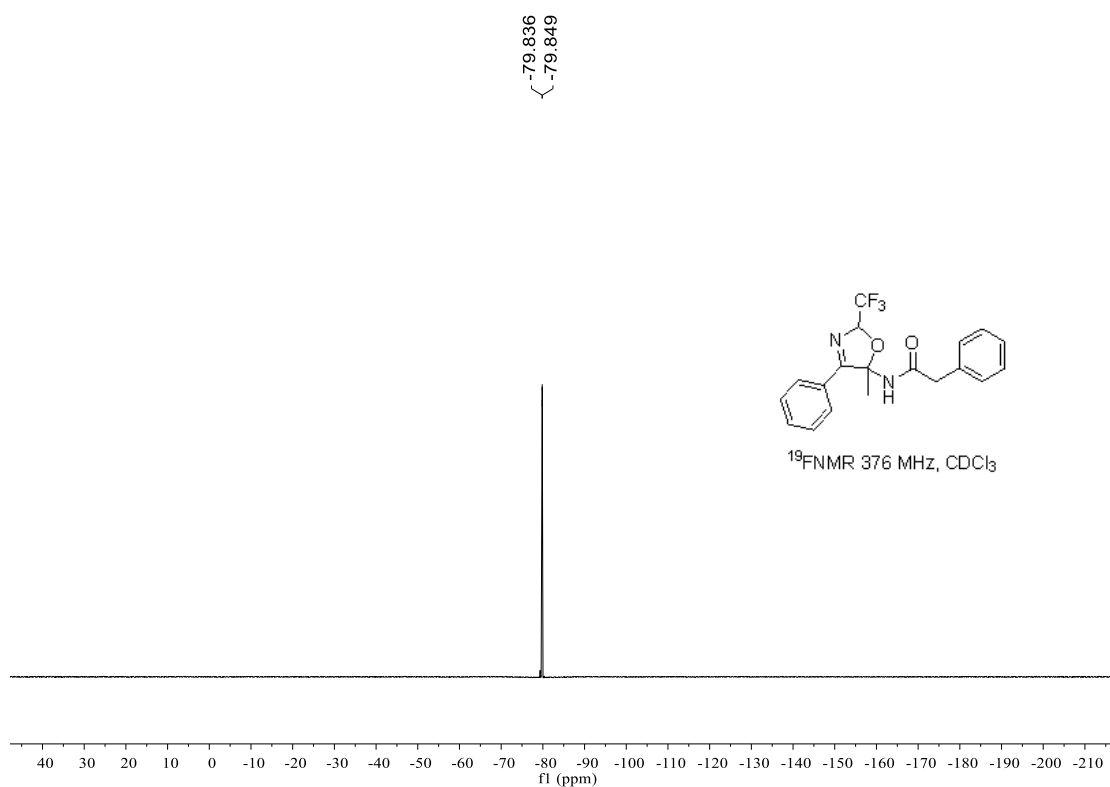

HRMS(ESI) copy of compound **3s**:

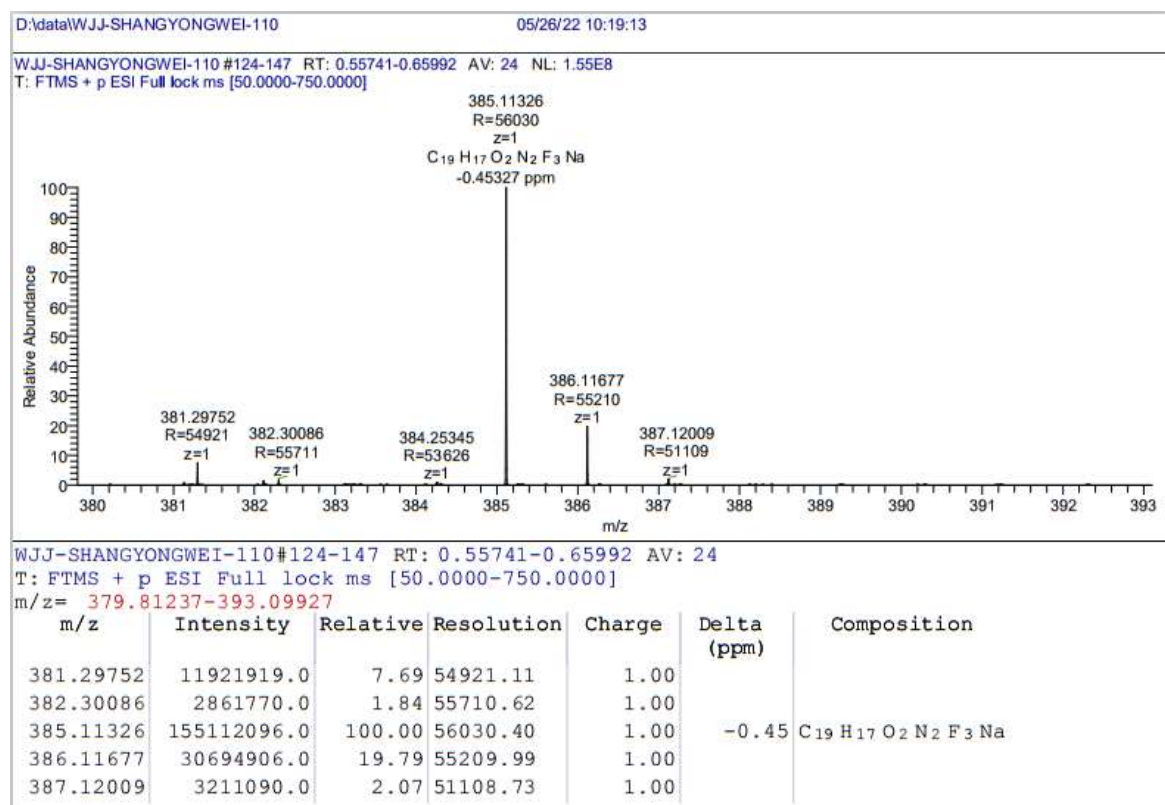

NMR copies of compound **3t**

$^1\text{H}$  NMR (400 MHz) spectrum of **3t** in  $\text{CDCl}_3$

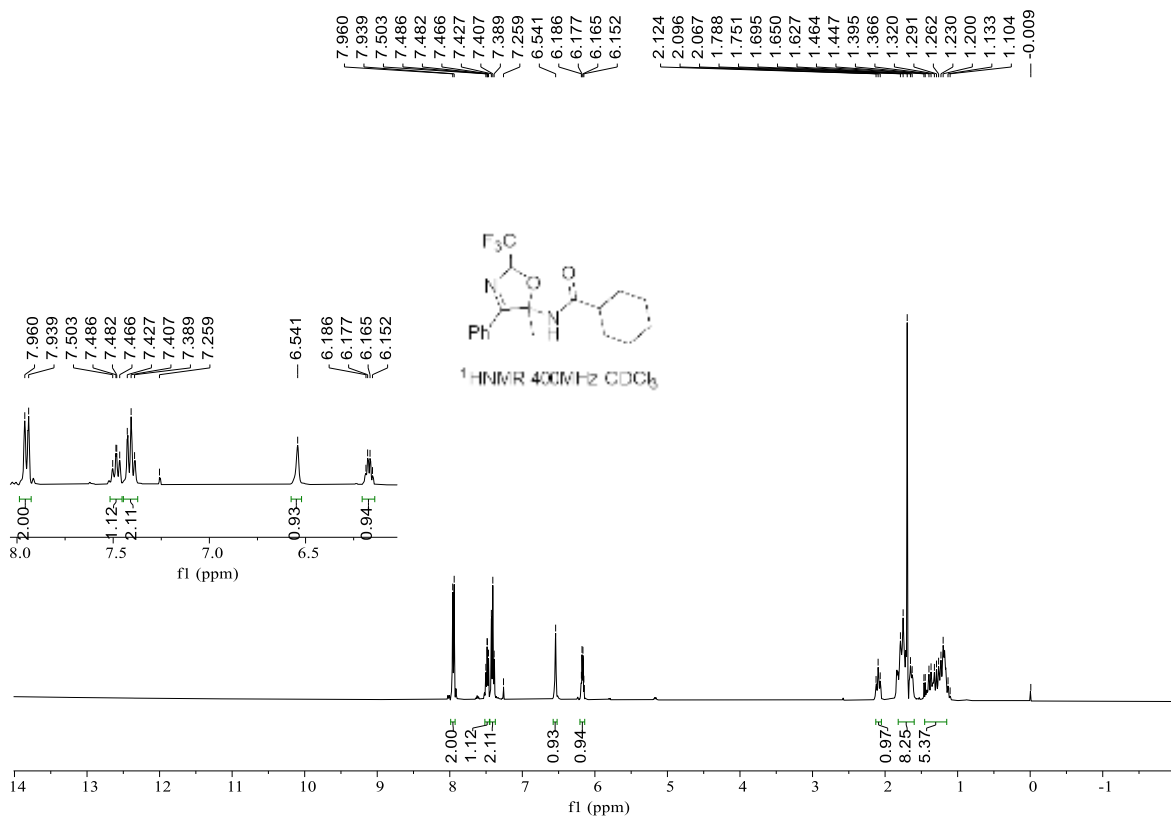

$^{13}\text{C}$  NMR (150 MHz) spectrum of **3t** in  $\text{CDCl}_3$

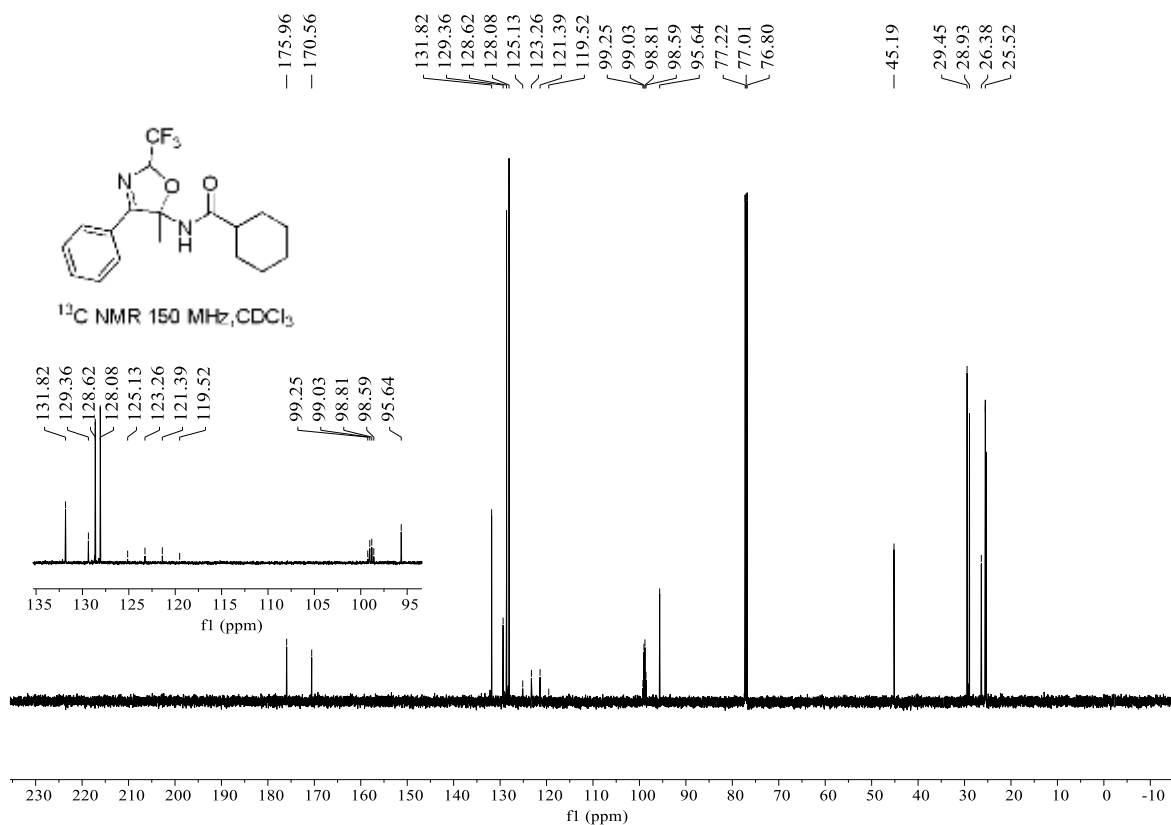



<sup>19</sup>F NMR (376 MHz) spectrum of **3t** in CDCl<sub>3</sub>

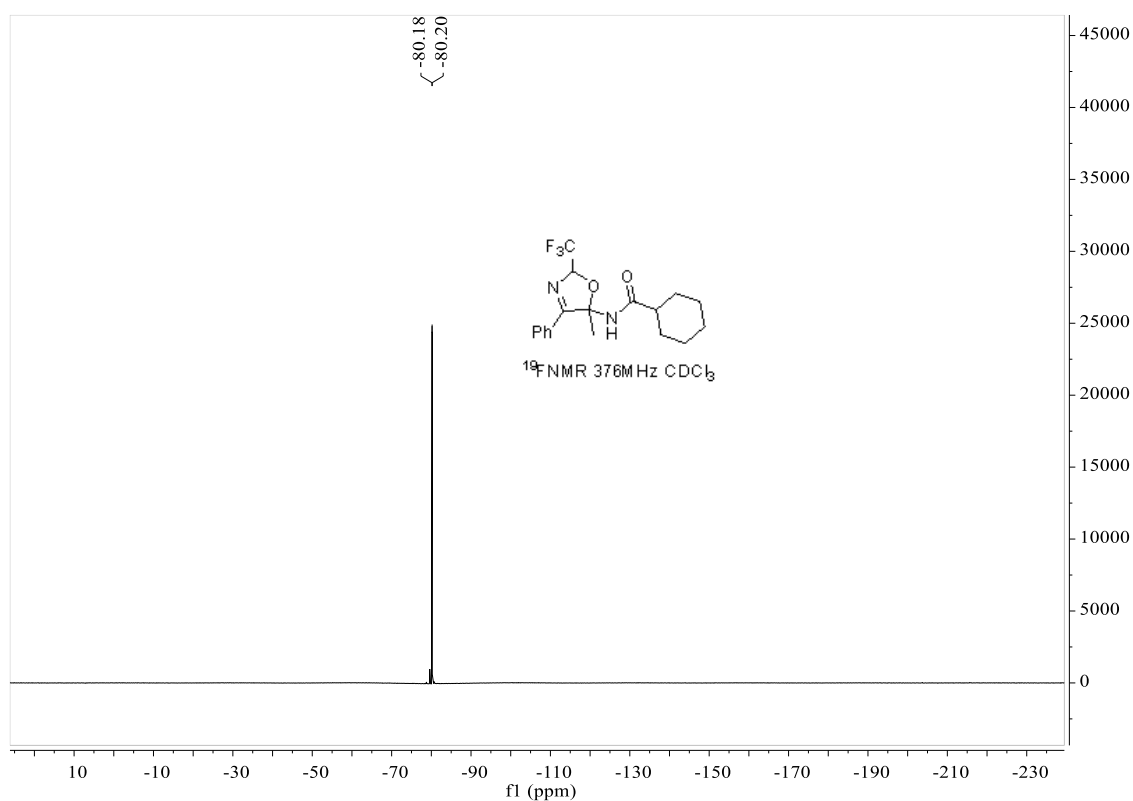

HRMS(ESI) copy of compound **3t**:

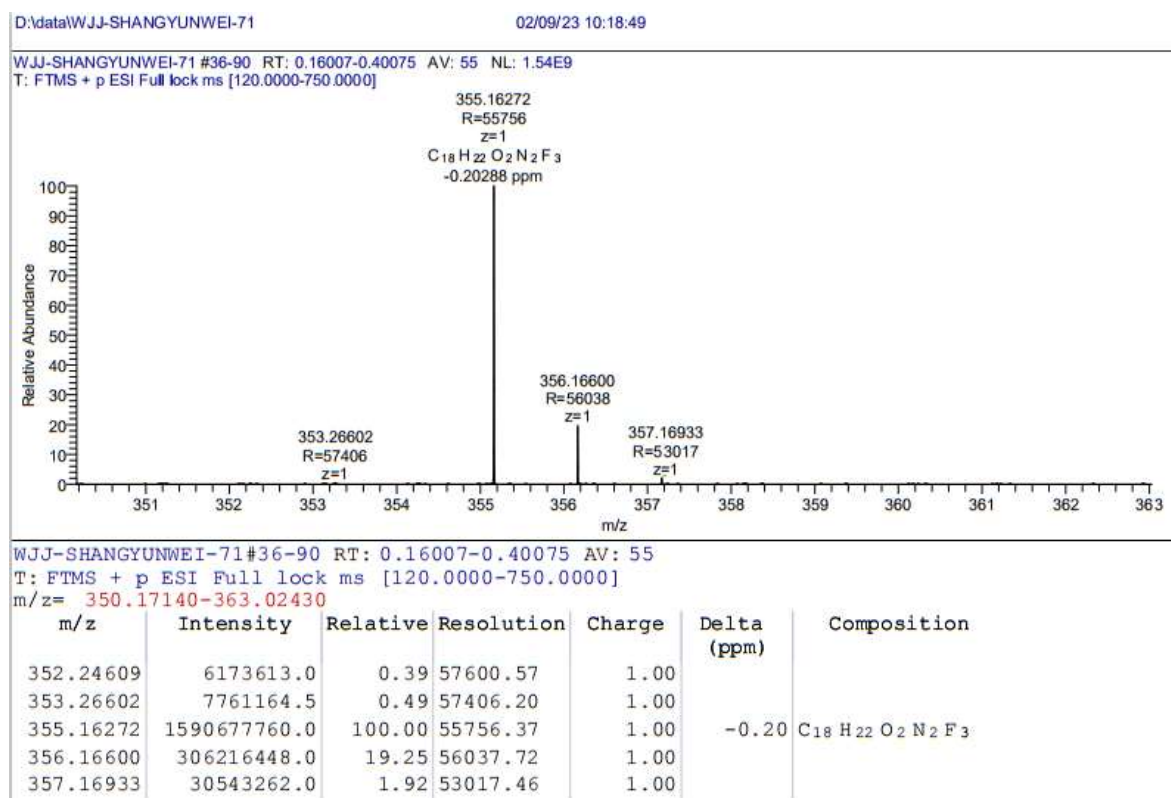

NMR copies of compound **3u**

<sup>1</sup>H NMR (400 MHz) spectrum of **3u** in CDCl<sub>3</sub>

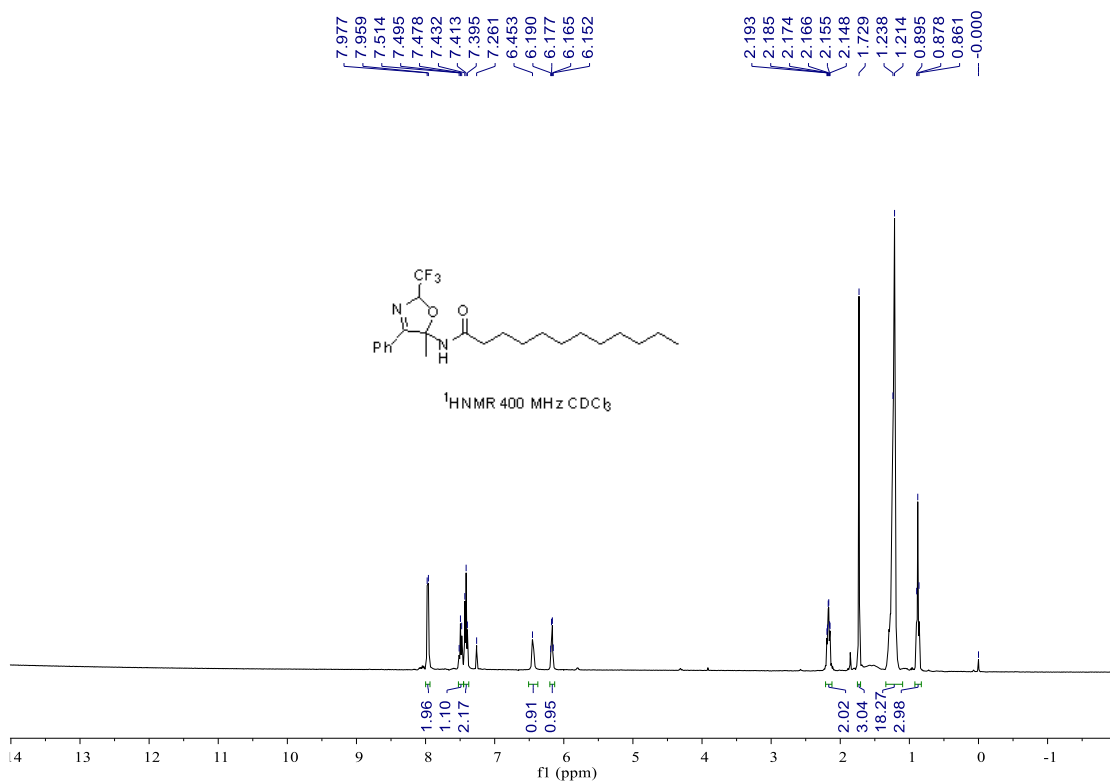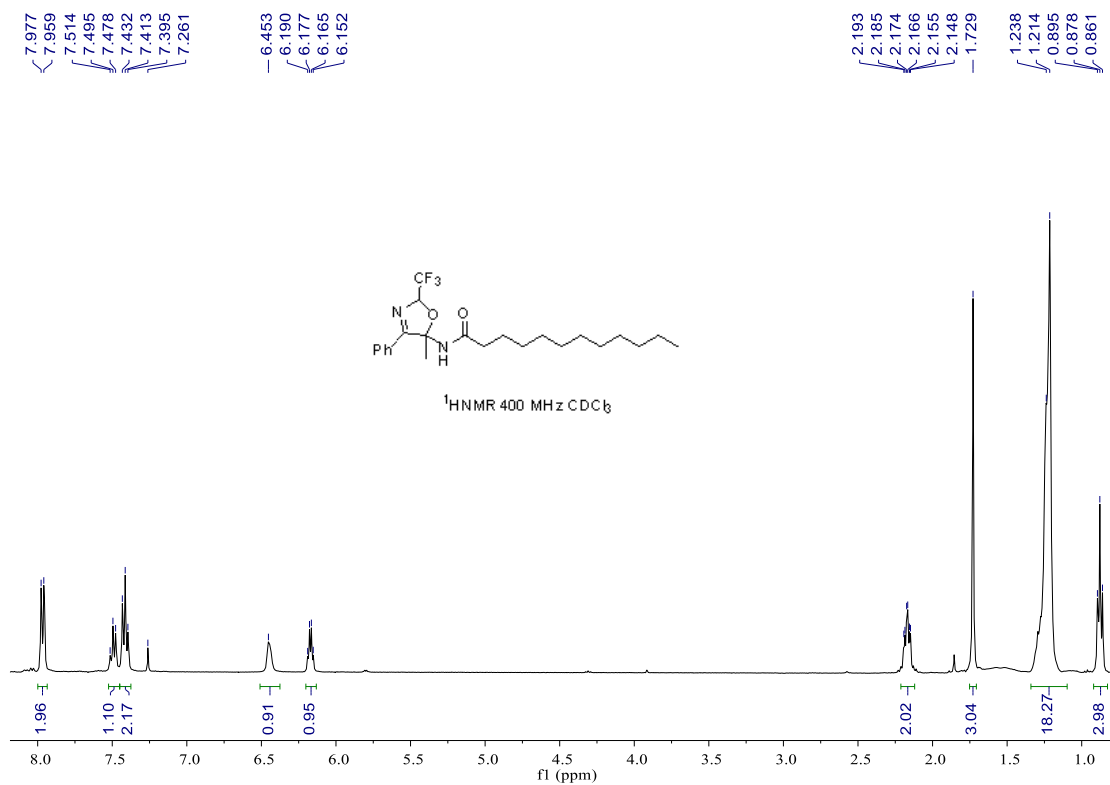

<sup>13</sup>C NMR (150 MHz) spectrum of **3u** in CDCl<sub>3</sub>

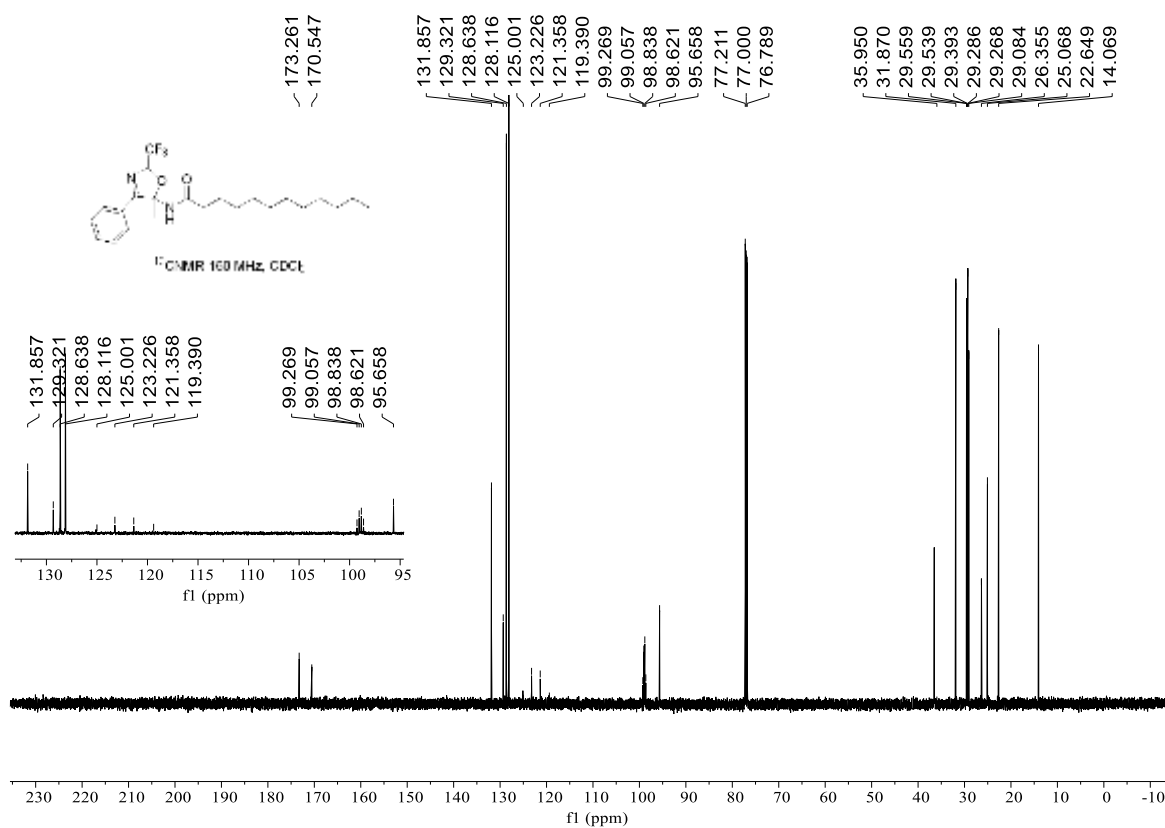

<sup>19</sup>F NMR (376 MHz) spectrum of **3u** in CDCl<sub>3</sub>

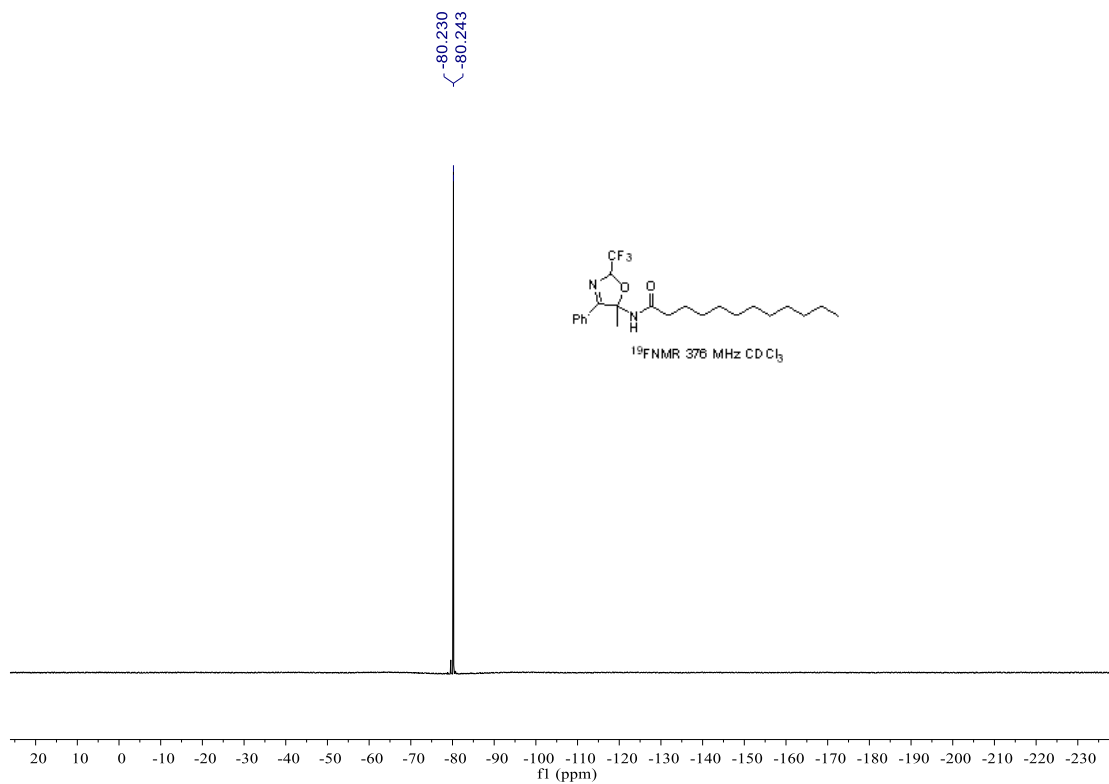

# HRMS(ESI) copy of compound **3u**:

D:\data\WJJ-SHANGYONGWEI-111

05/26/22 10:23:42

WJJ-SHANGYONGWEI-111#23-72 RT: 0.10211-0.32050 AV: 50 NL: 5.97E8

T: FTMS +p ESI Full lock ms [50.0000-750.0000]

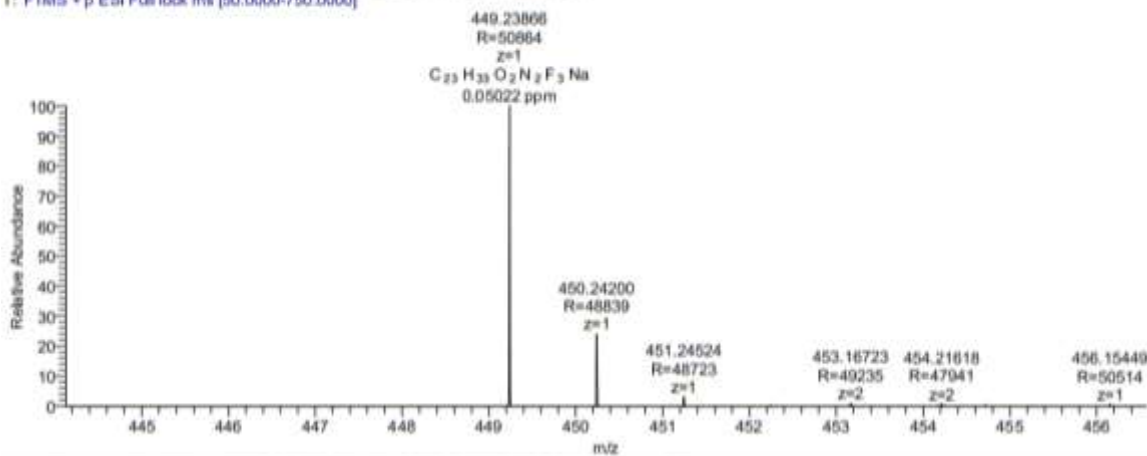

WJJ-SHANGYONGWEI-111#23-72 RT: 0.10211-0.32050 AV: 50

T: FTMS + p ESI Full lock ms [50.0000-750.0000]

m/z= 444.12853-456.56913

| m/z       | Intensity   | Relative | Resolution | Charge | Delta (ppm) | Composition                                                                     |
|-----------|-------------|----------|------------|--------|-------------|---------------------------------------------------------------------------------|
| 449.23866 | 597206656.0 | 100.00   | 50863.84   | 1.00   | 0.05        | C <sub>23</sub> H <sub>33</sub> O <sub>2</sub> N <sub>2</sub> F <sub>3</sub> Na |
| 450.24200 | 147627296.0 | 24.72    | 48838.74   | 1.00   |             |                                                                                 |
| 451.24524 | 19092064.0  | 3.20     | 48722.88   | 1.00   |             |                                                                                 |
| 453.16723 | 5897390.5   | 0.99     | 49235.32   | 2.00   |             |                                                                                 |
| 454.21618 | 4404201.0   | 0.74     | 47940.56   | 2.00   |             |                                                                                 |

# NMR copies of compound **4a**

## <sup>1</sup>H NMR (400 MHz) spectrum of **4a** in CDCl<sub>3</sub>

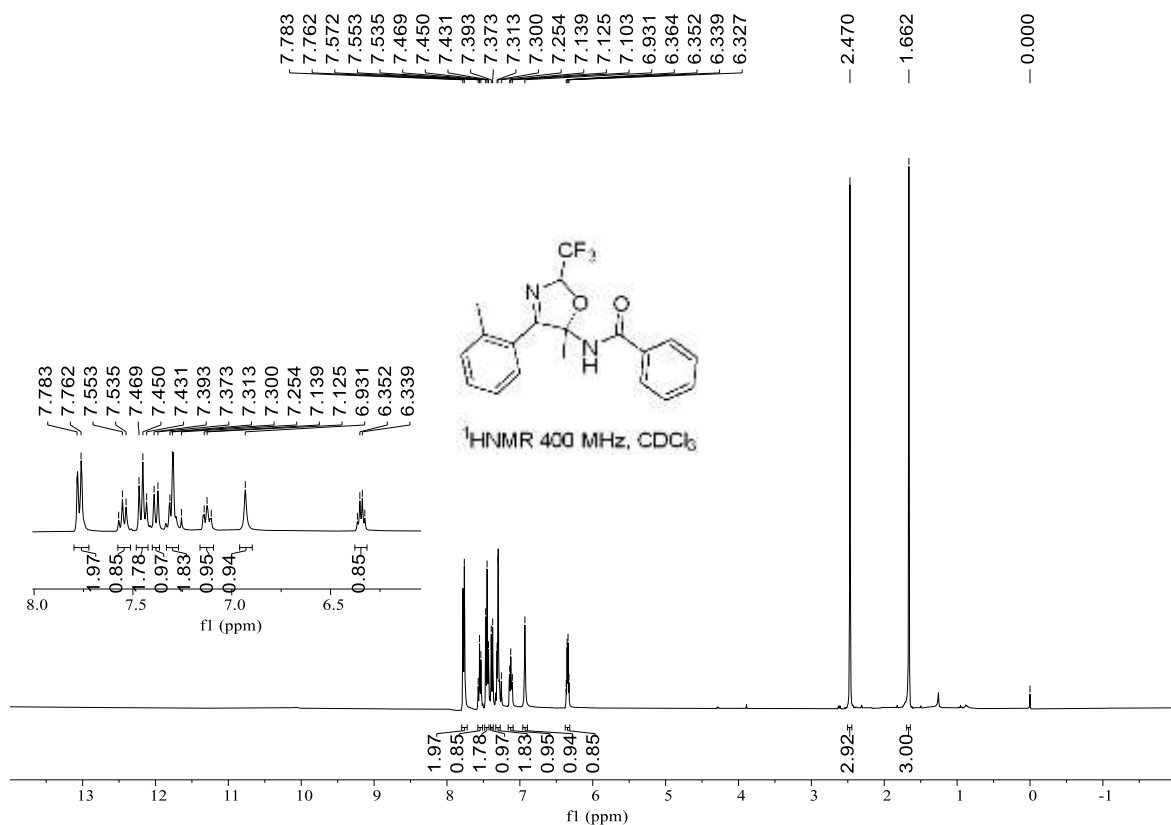

<sup>13</sup>C NMR (150 MHz) spectrum of **4a** in CDCl<sub>3</sub>

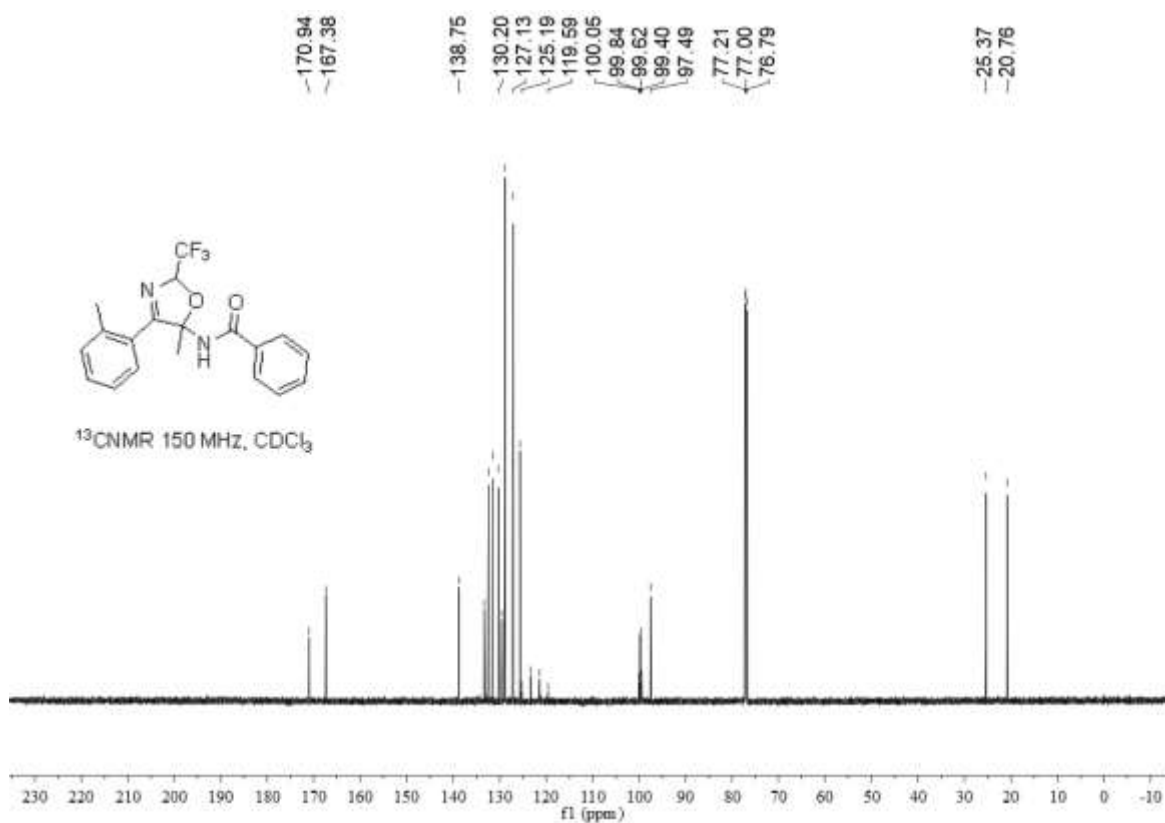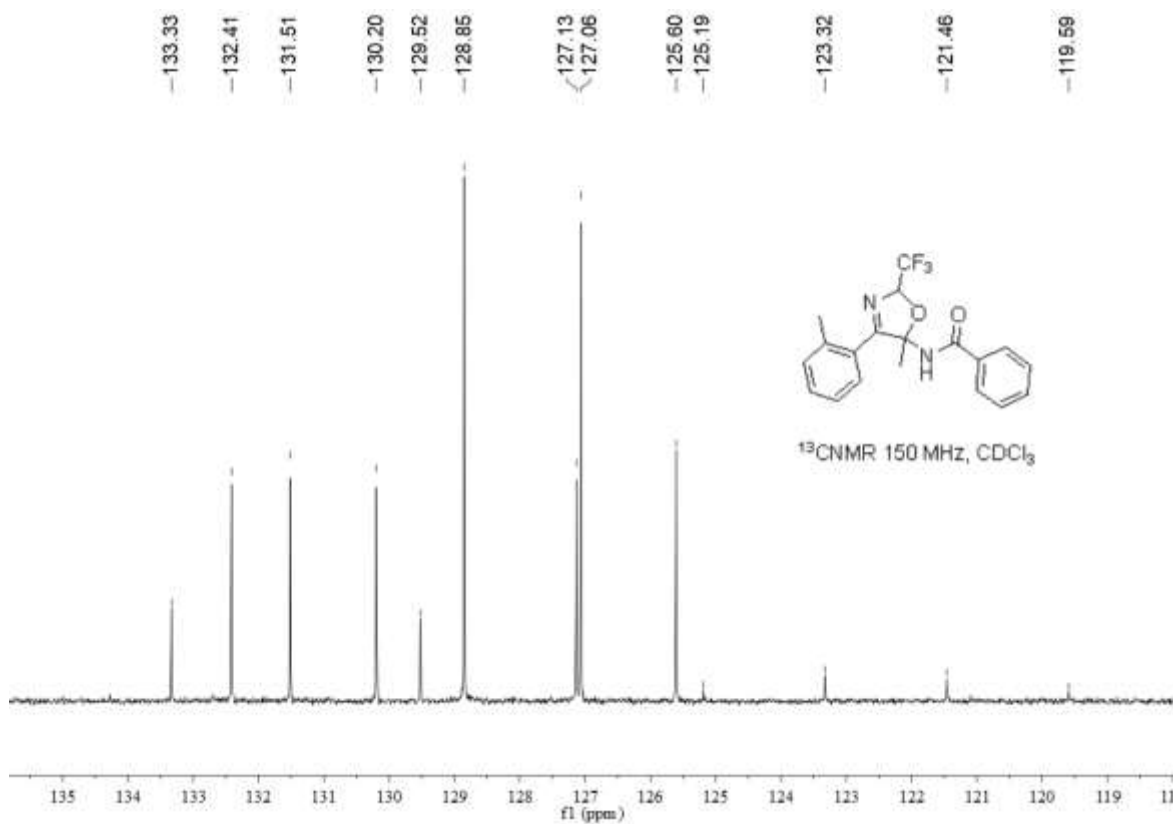

$^{19}\text{F}$  NMR (376 MHz) spectrum of **4a** in  $\text{CDCl}_3$

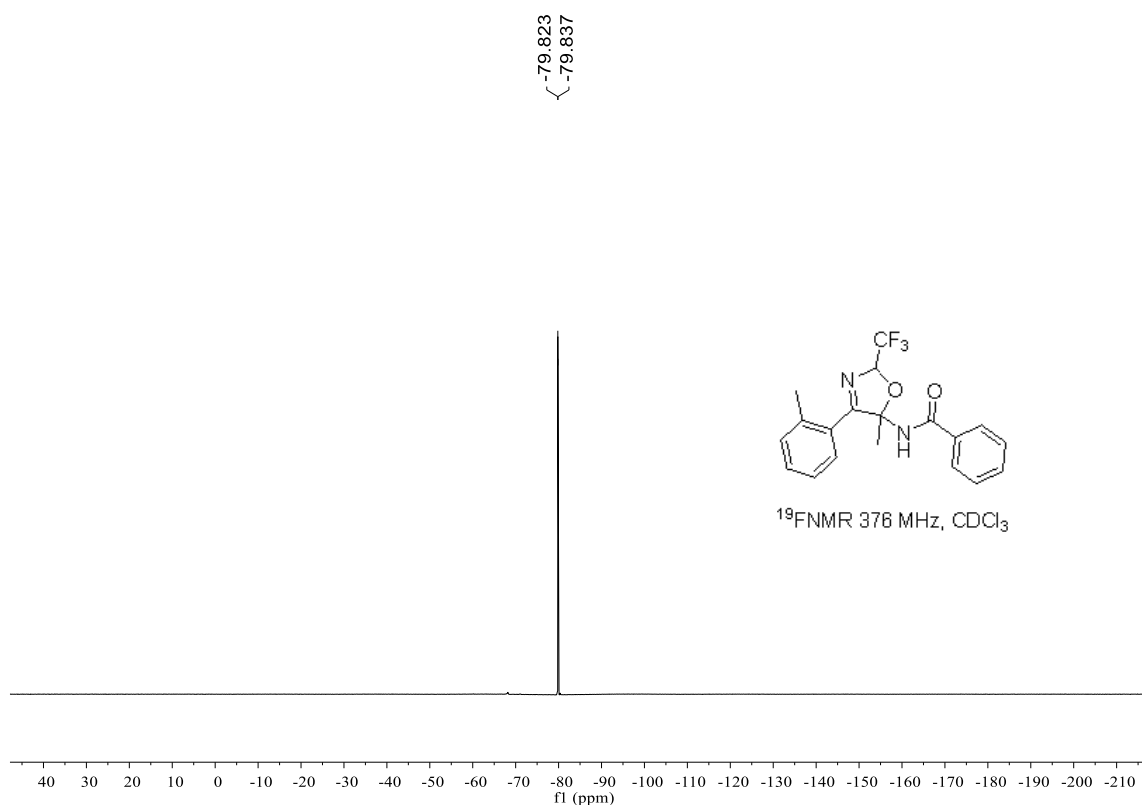

HRMS(ESI) copy of compound **4a**:

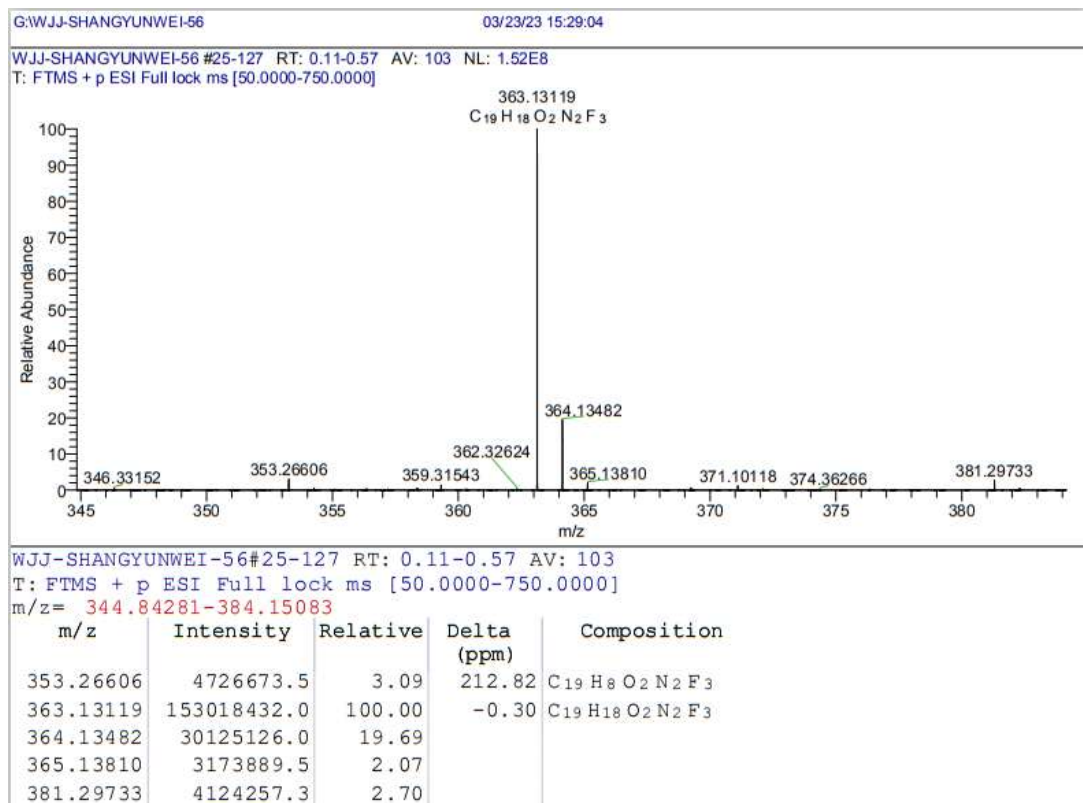

# NMR copies of compound **3b**

<sup>1</sup>H NMR (400 MHz) spectrum of **3b** in CDCl<sub>3</sub>

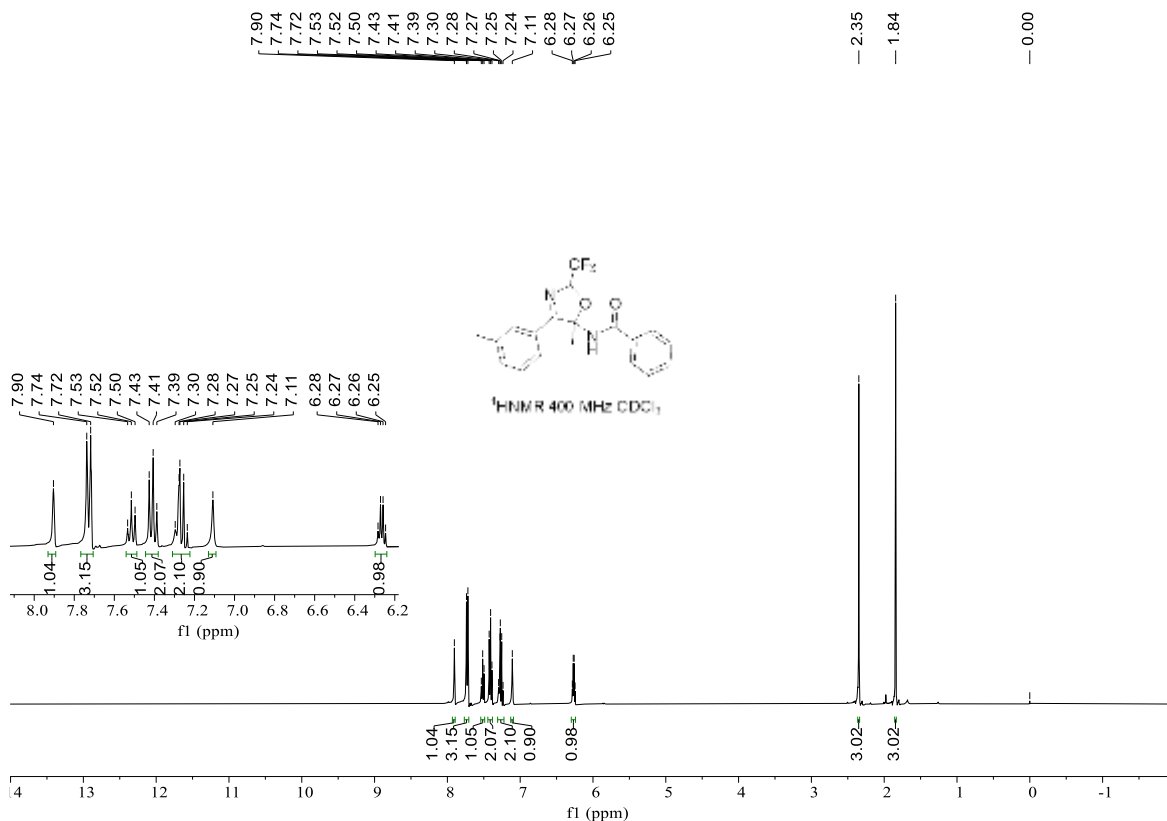

<sup>13</sup>C NMR (150 MHz) spectrum of **4b** in CDCl<sub>3</sub>

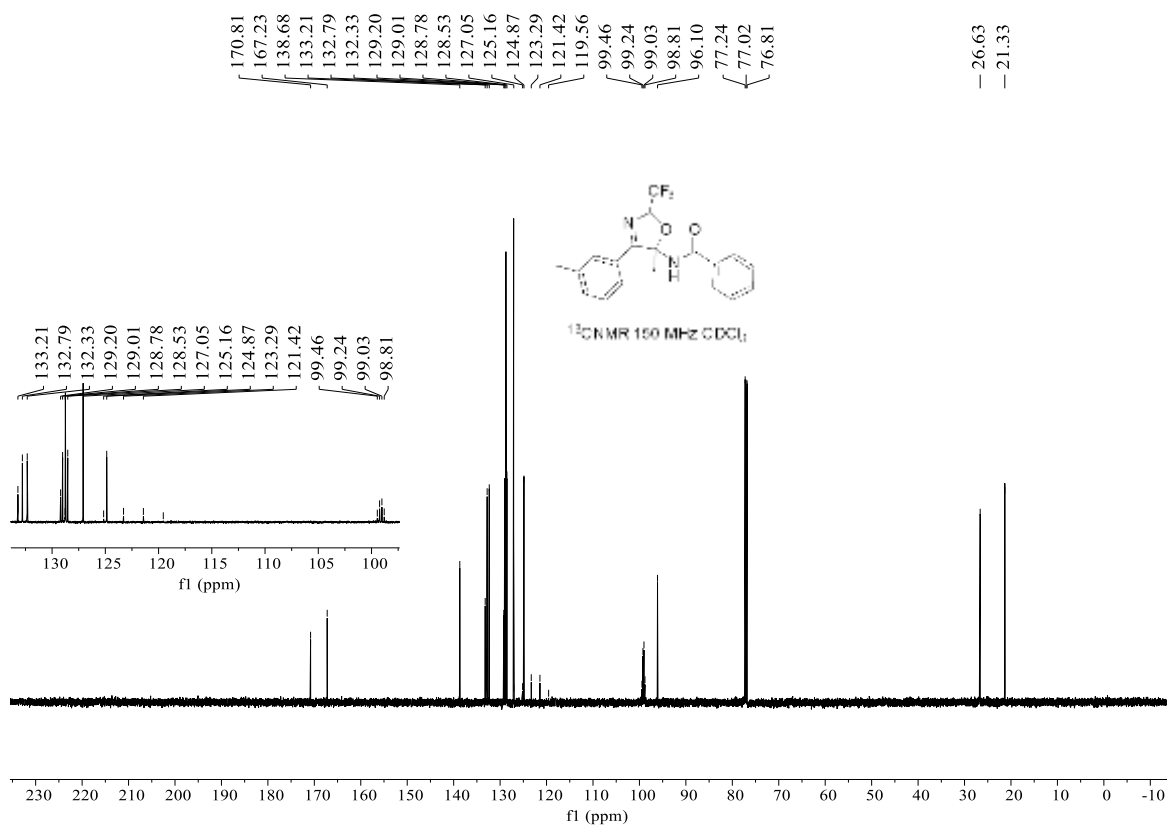

$^{19}\text{F}$  NMR (376 MHz) spectrum of **4b** in  $\text{CDCl}_3$

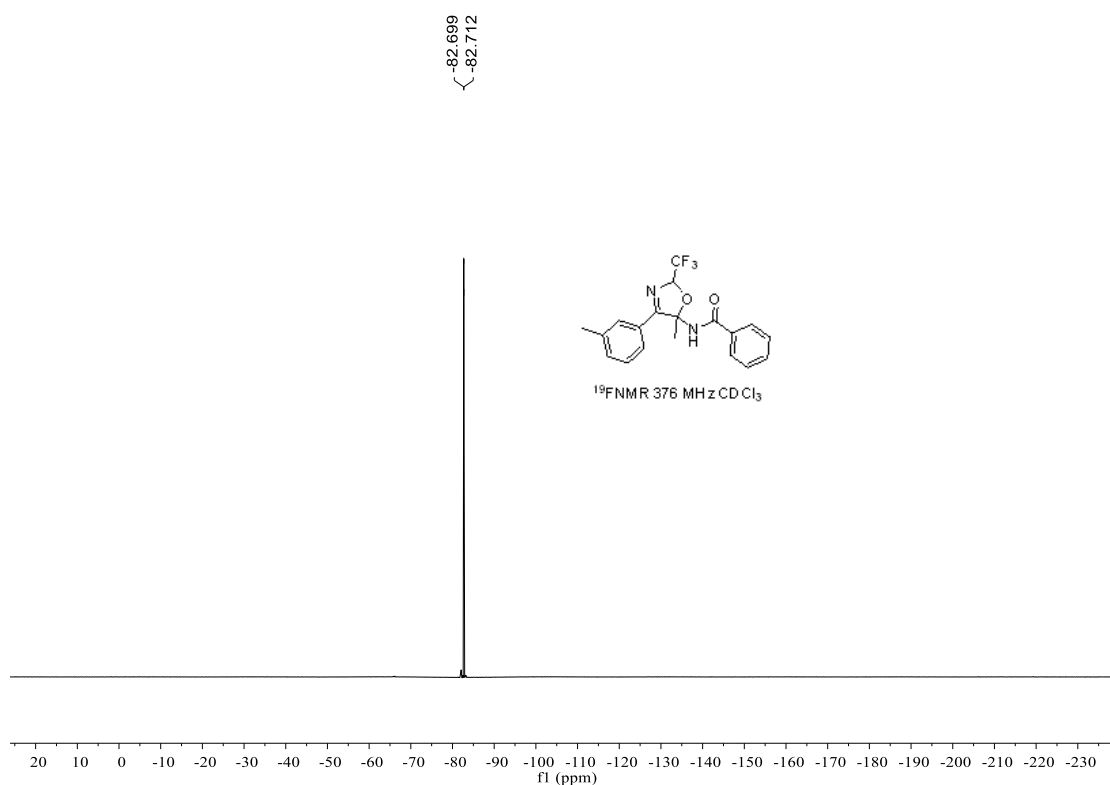

HRMS(ESI) copy of compound **4b**:

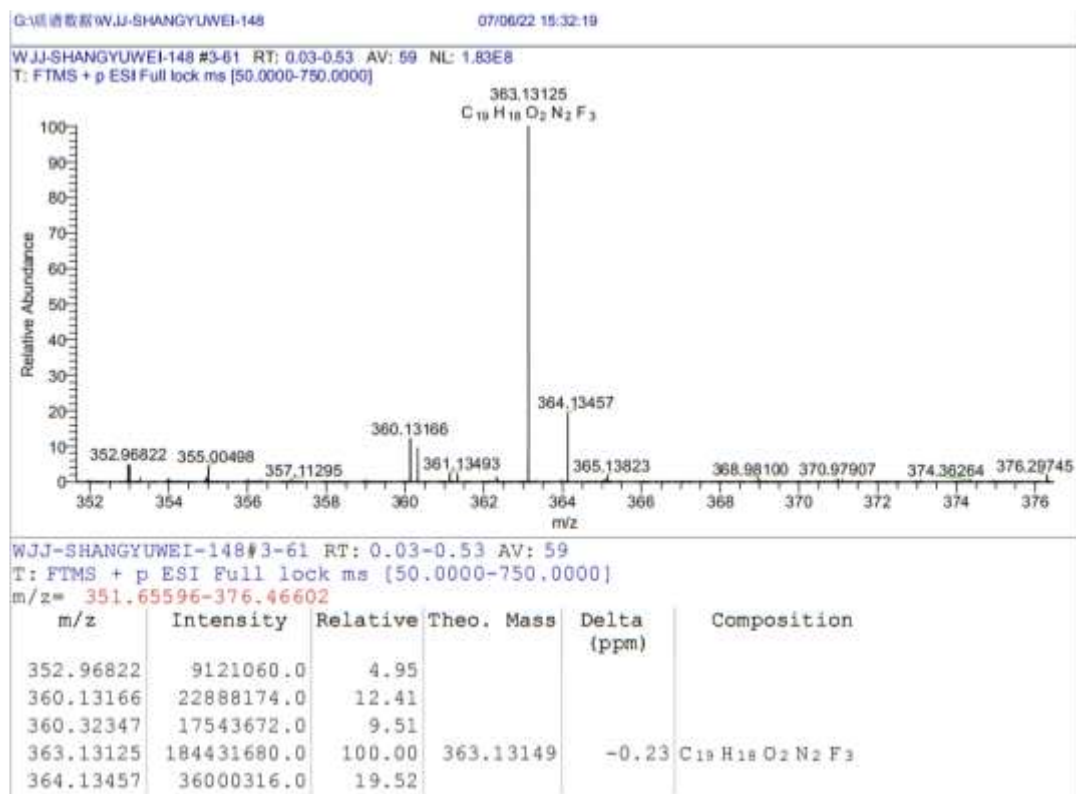



NMR copies of compound **4c**

$^1\text{H}$  NMR (400 MHz) spectrum of **4c** in  $\text{CDCl}_3$

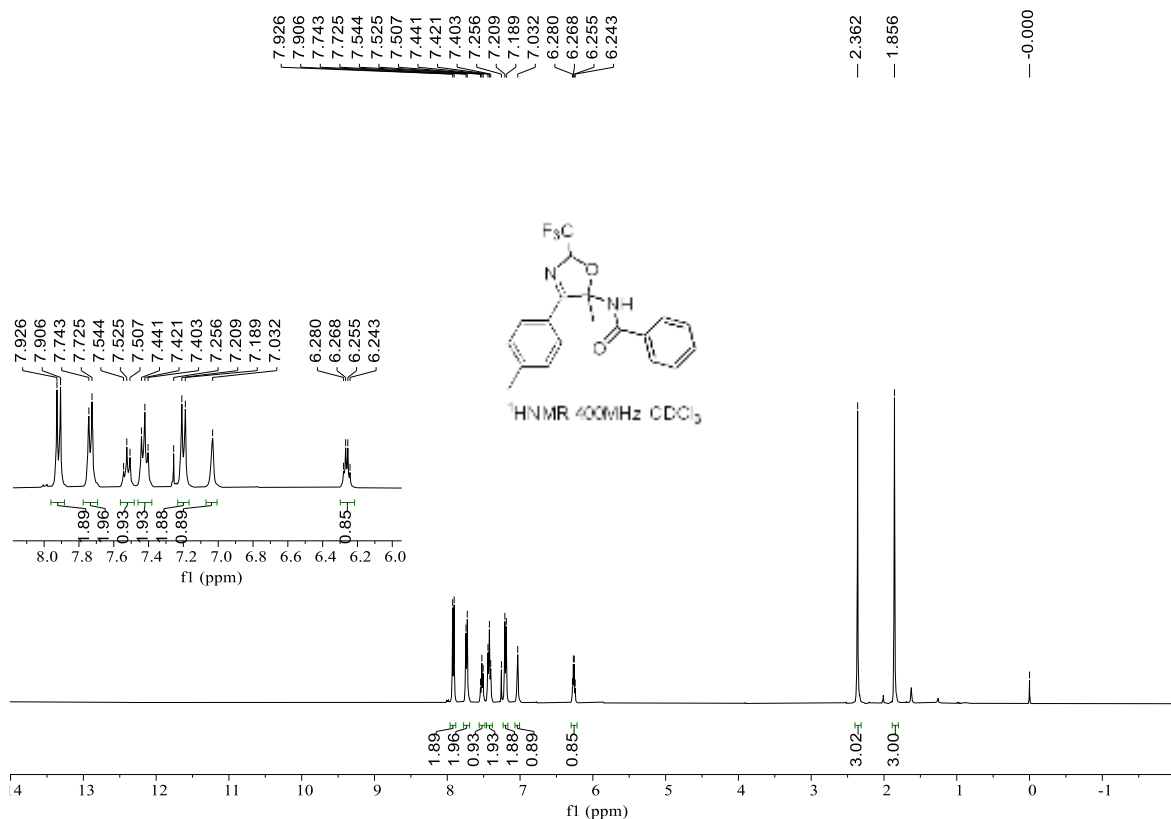

$^{13}\text{C}$  NMR (150 MHz) spectrum of **4c** in  $\text{CDCl}_3$

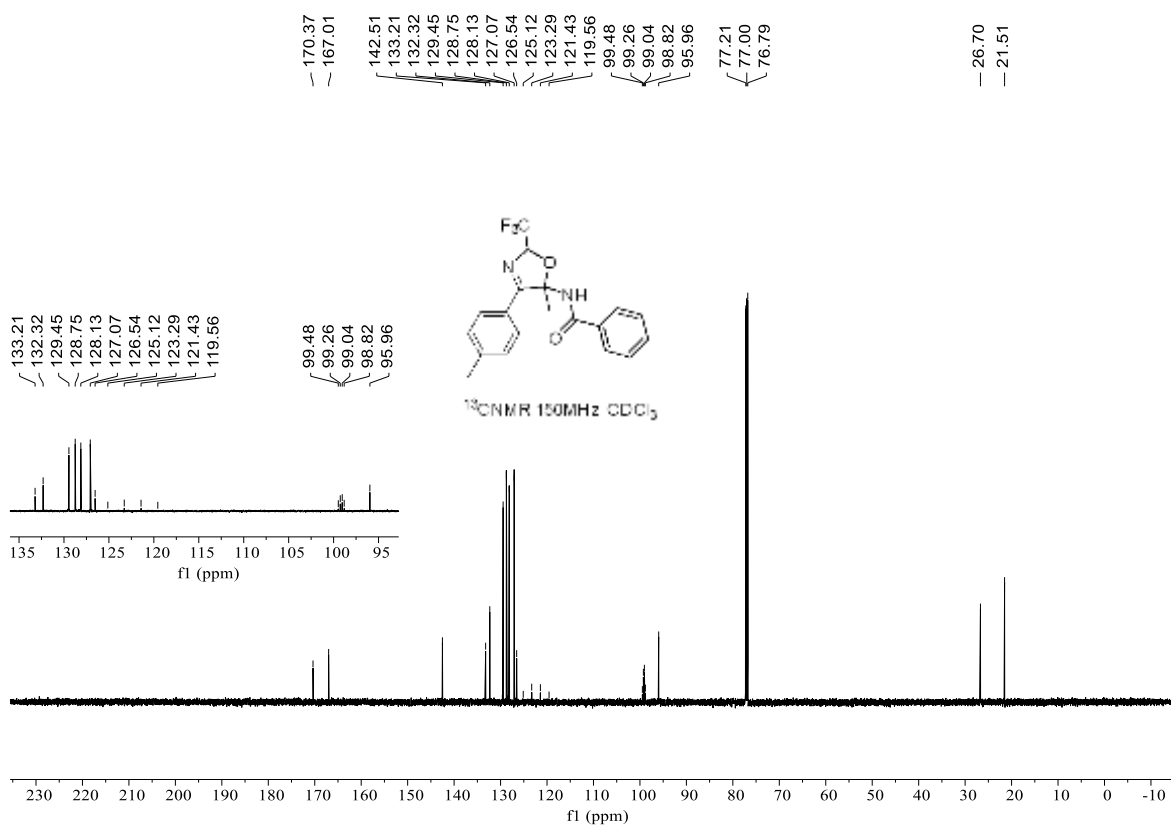

$^{19}\text{F}$  NMR (376 MHz) spectrum of **4c** in  $\text{CDCl}_3$

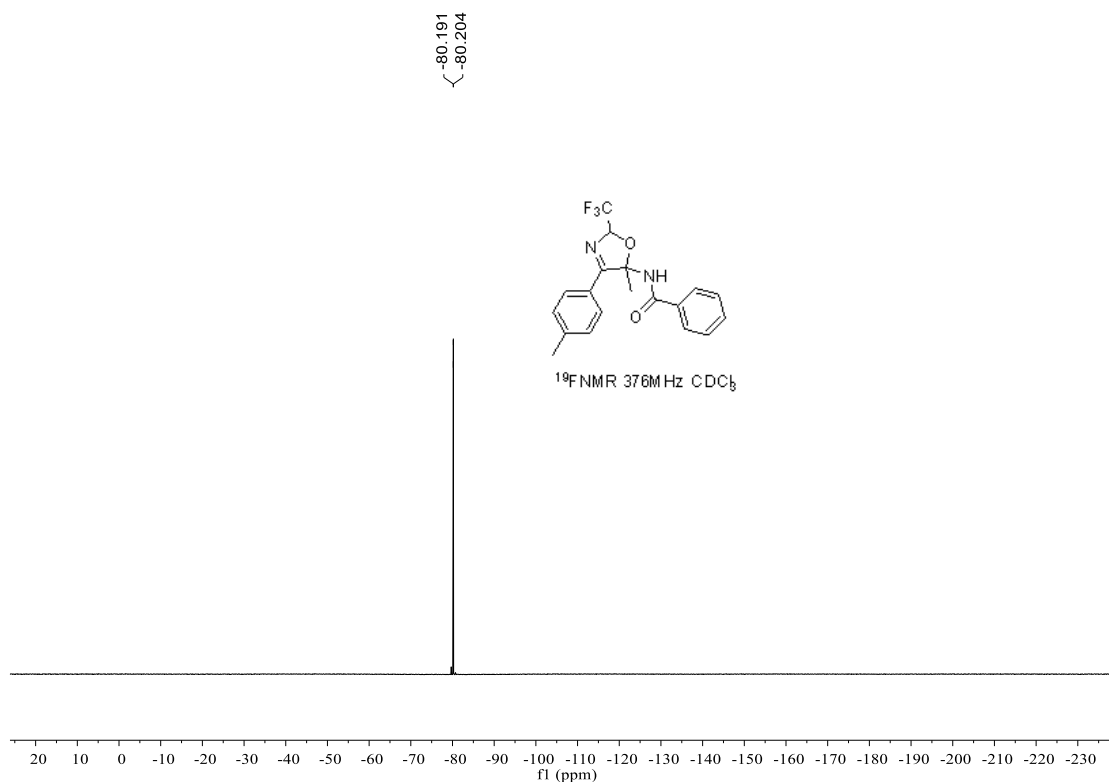

HRMS(ESI) copy of compound **4c**:

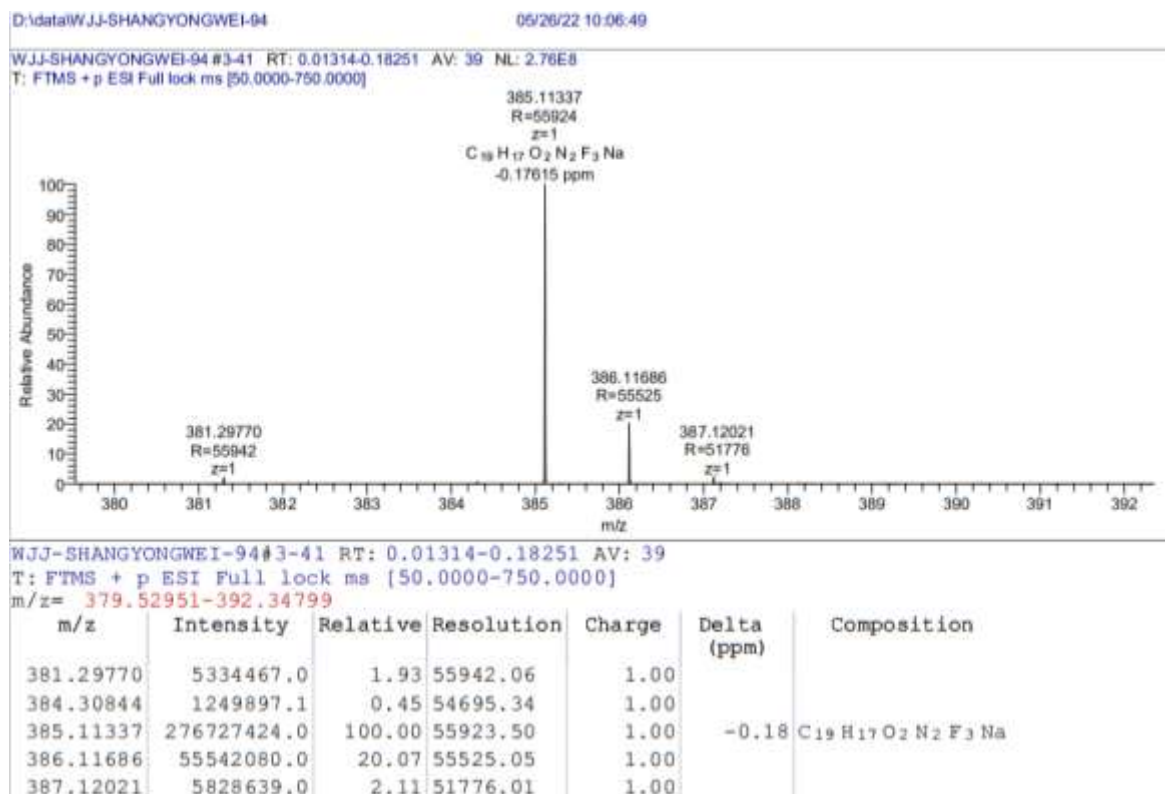

NMR copies of compound **4d**

$^1\text{H}$  NMR (400 MHz) spectrum of **4d** in  $\text{CDCl}_3$

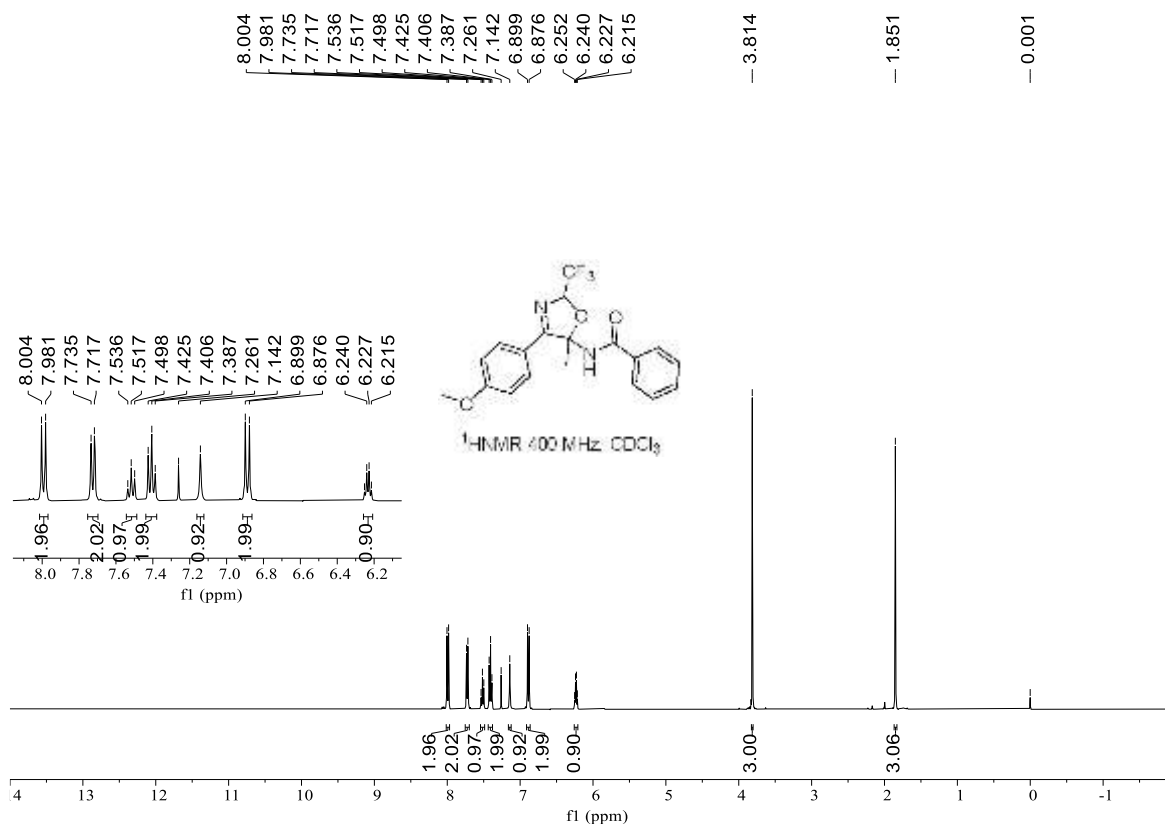

$^{13}\text{C}$  NMR (150 MHz) spectrum of **4d** in  $\text{CDCl}_3$

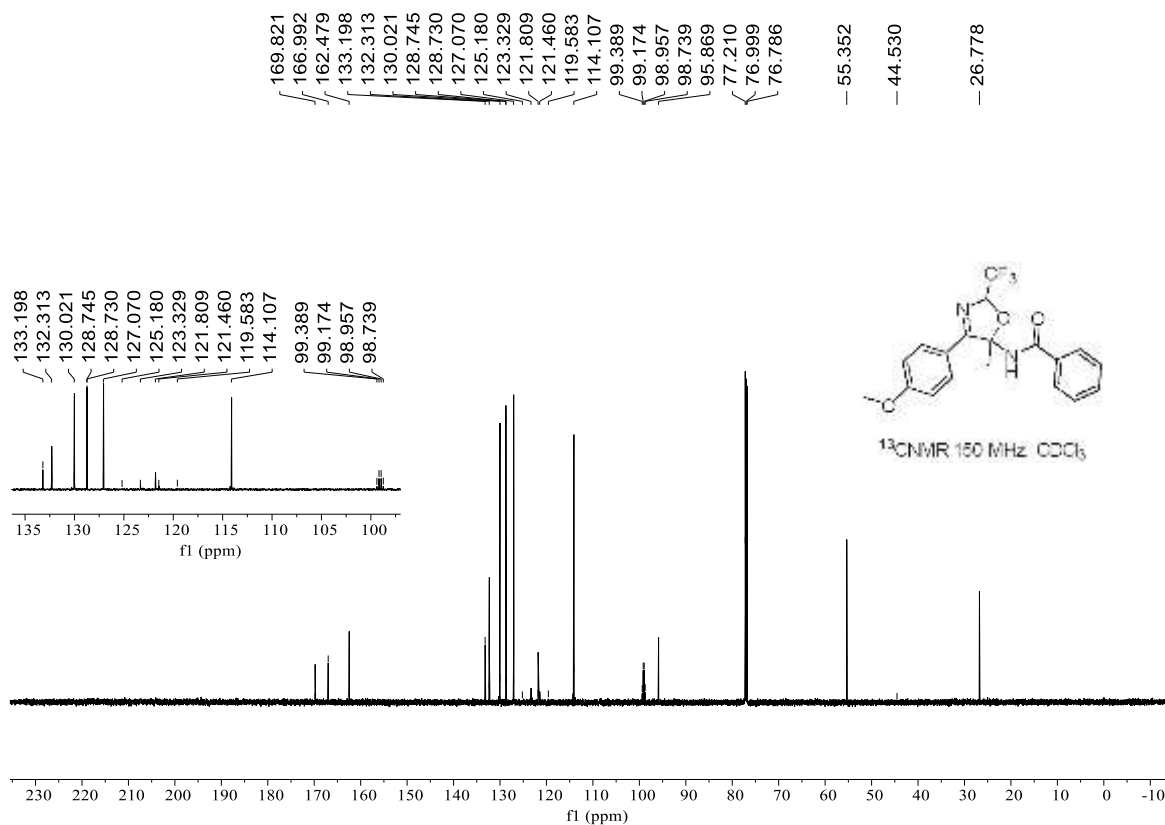

$^{19}\text{F}$  NMR (376 MHz) spectrum of **4d** in  $\text{CDCl}_3$

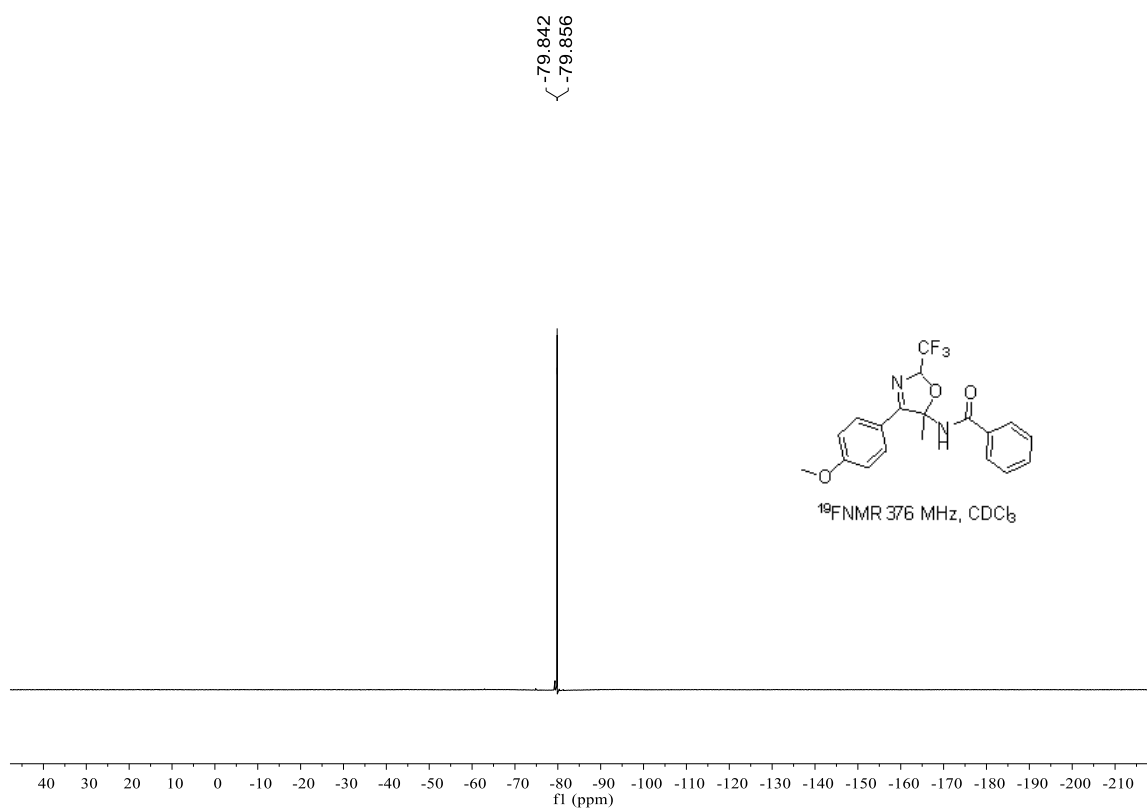

HRMS(ESI) copy of compound **4d**:

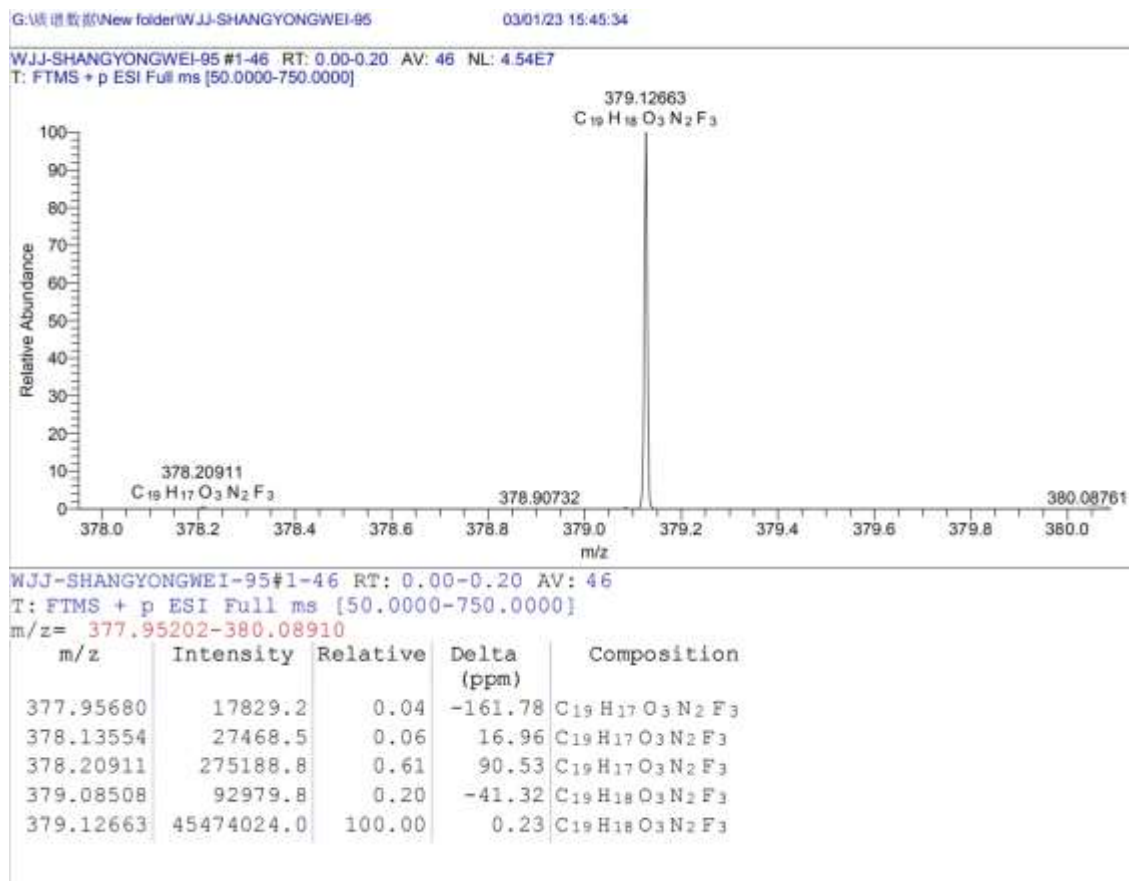

NMR copies of compound **4e**

$^1\text{H}$  NMR (400 MHz) spectrum of **4e** in  $\text{CDCl}_3$

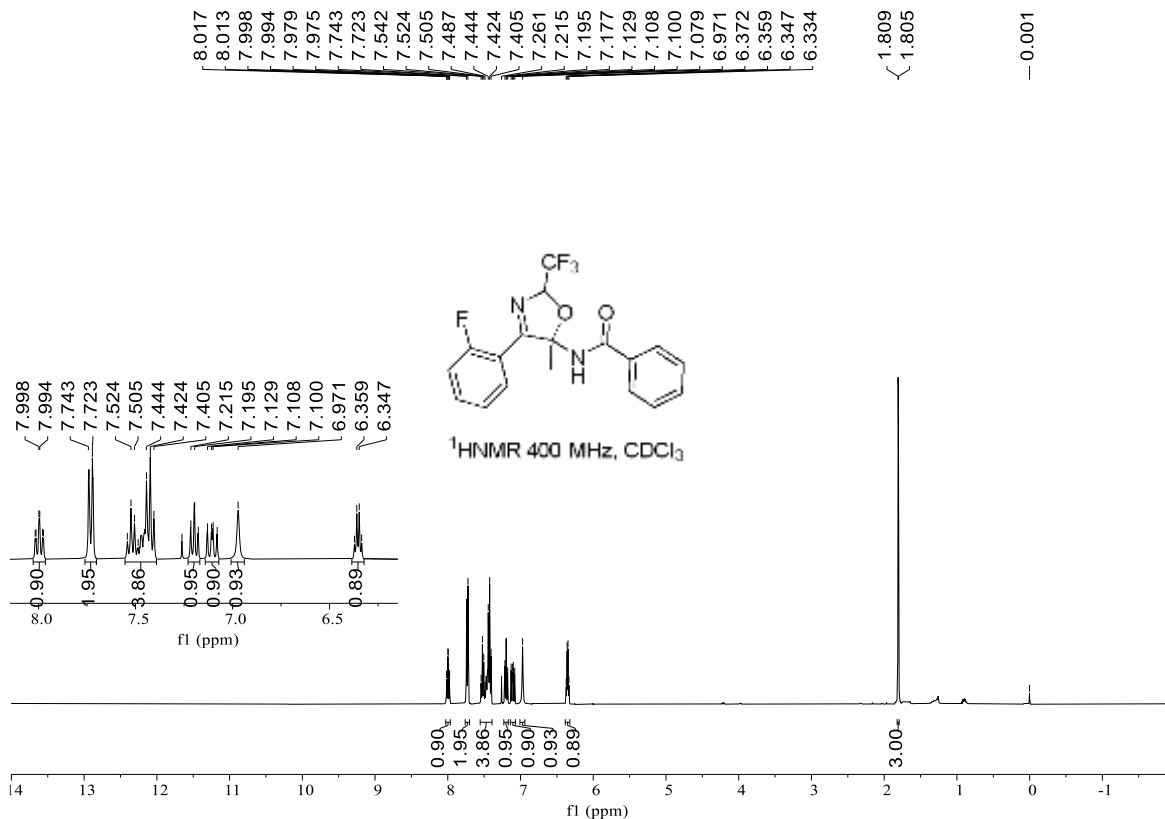

$^{13}\text{C}$  NMR (150 MHz) spectrum of **4e** in  $\text{CDCl}_3$

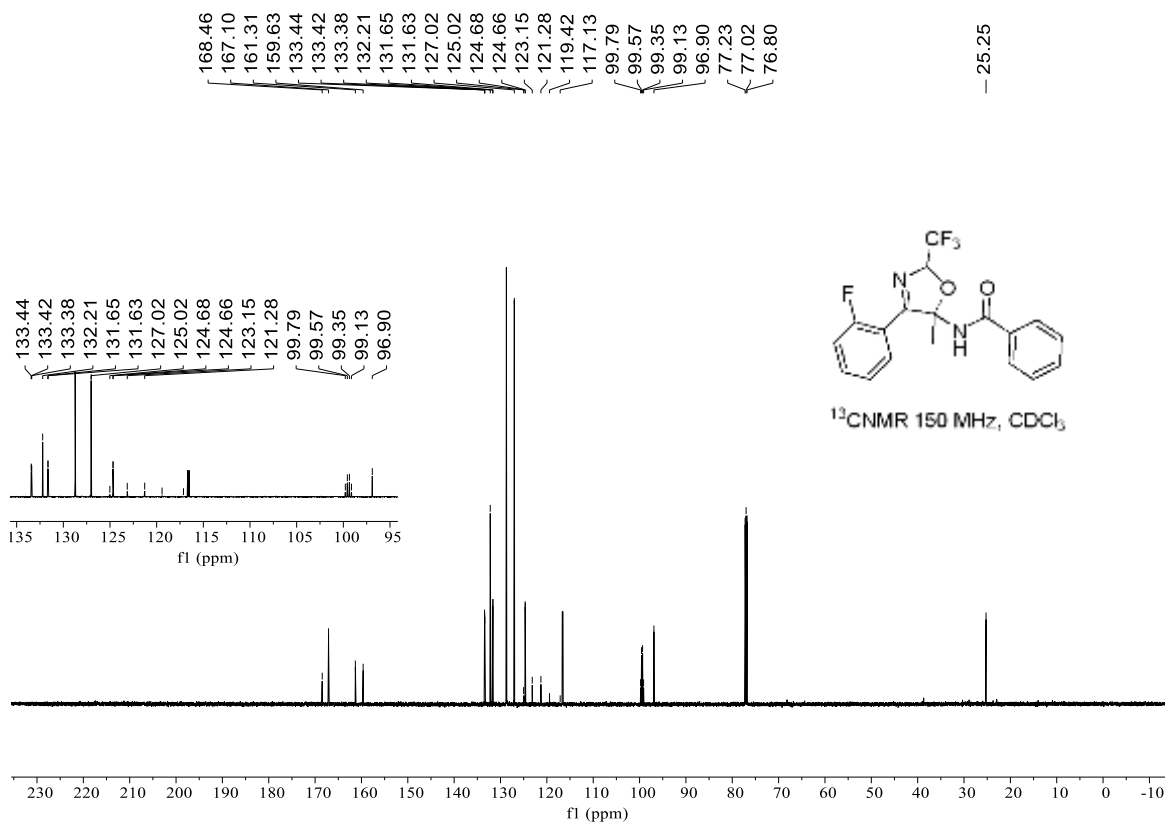

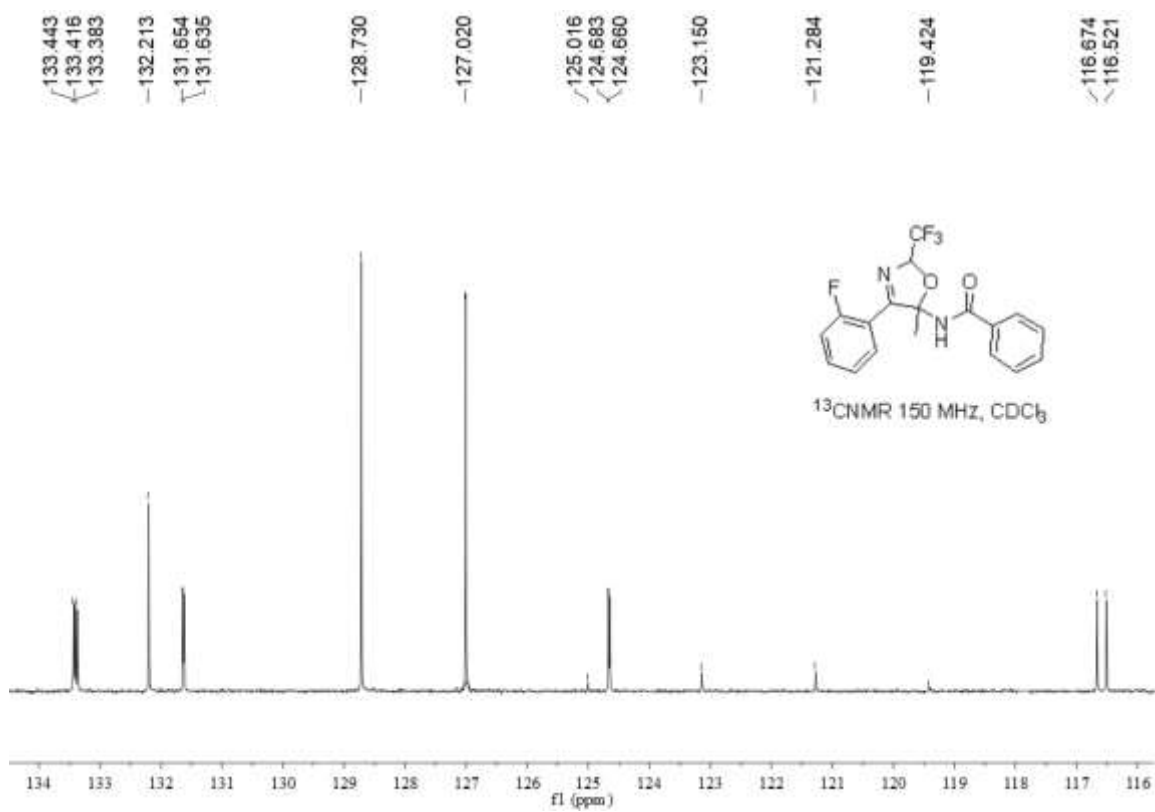

<sup>19</sup>F NMR (376 MHz) spectrum of **4e** in CDCl<sub>3</sub>

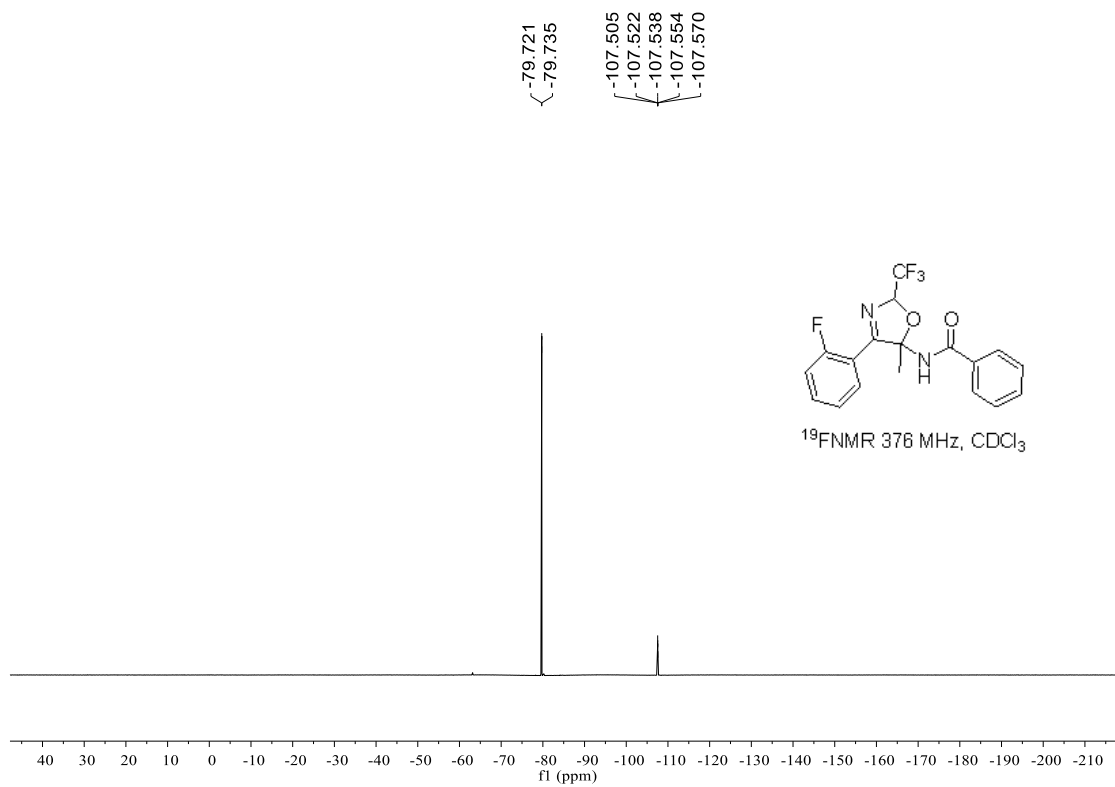

# HRMS(ESI) copy of compound 4e:

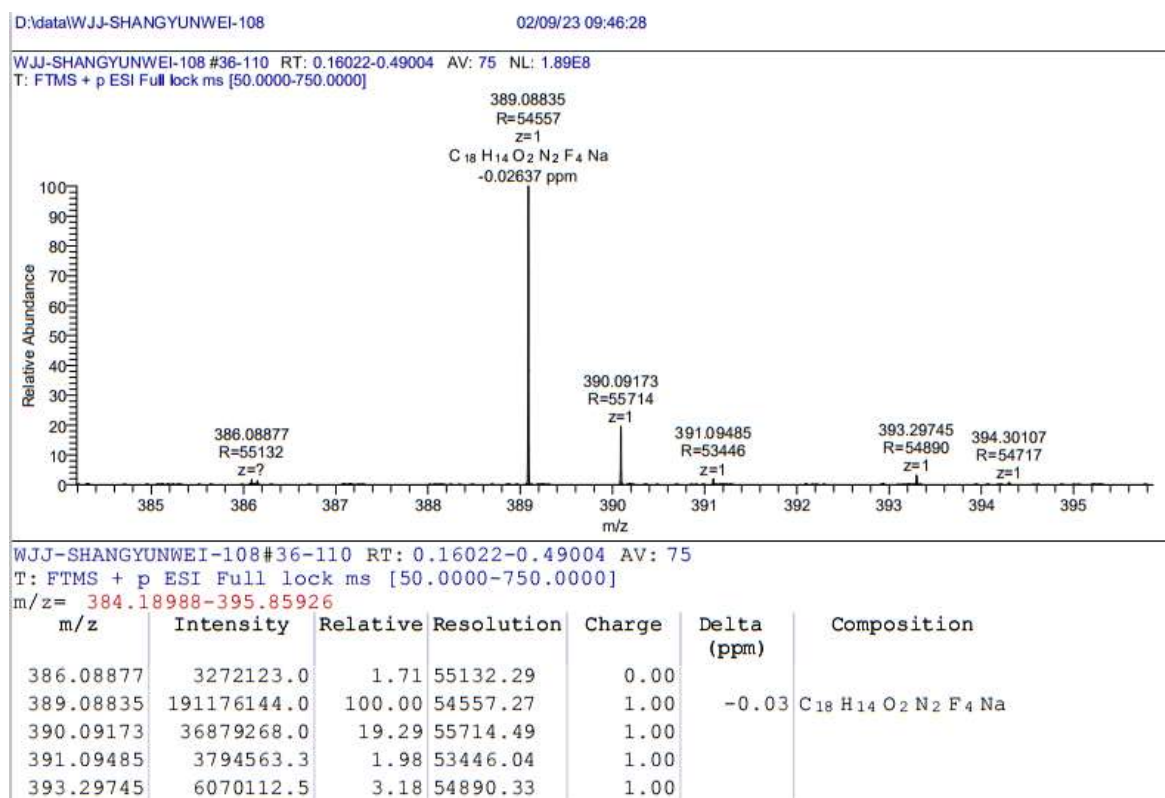

# NMR copies of compound 4f

<sup>1</sup>H NMR (400 MHz) spectrum of 4f in CDCl<sub>3</sub>

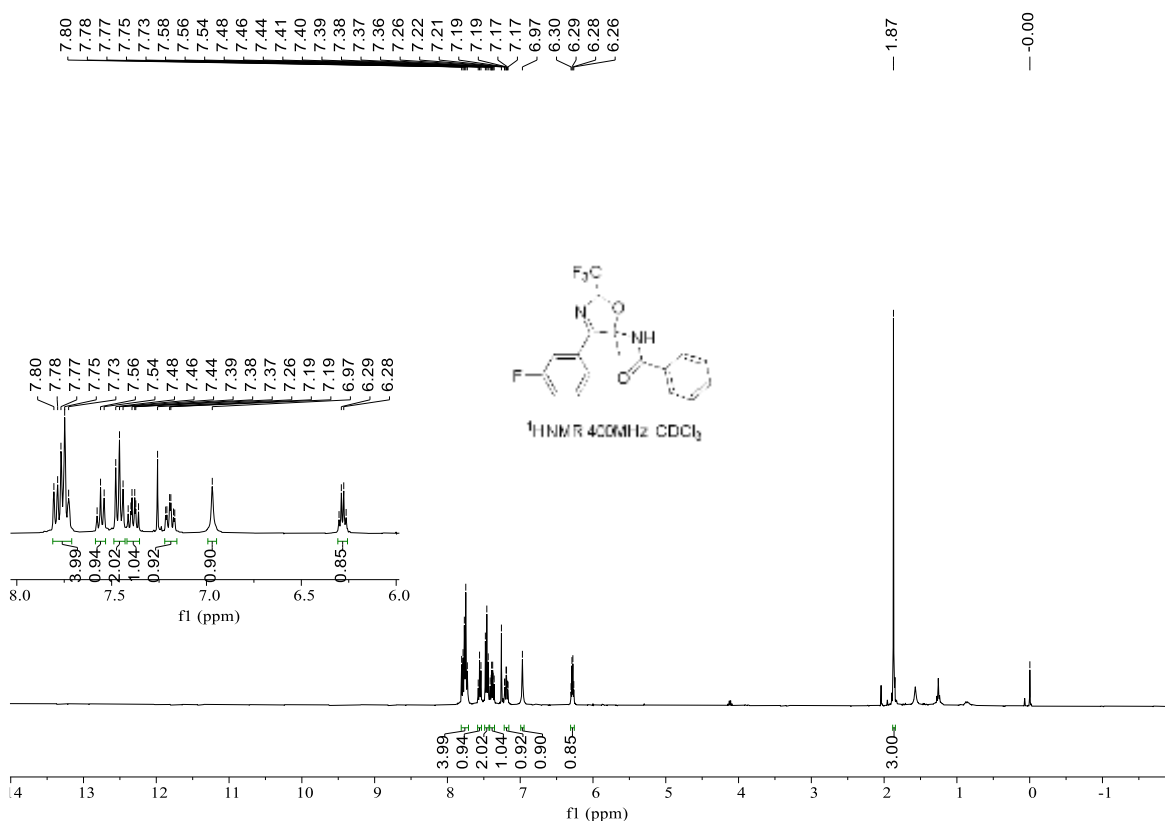

$^{13}\text{C}$  NMR (150 MHz) spectrum of **4f** in  $\text{CDCl}_3$

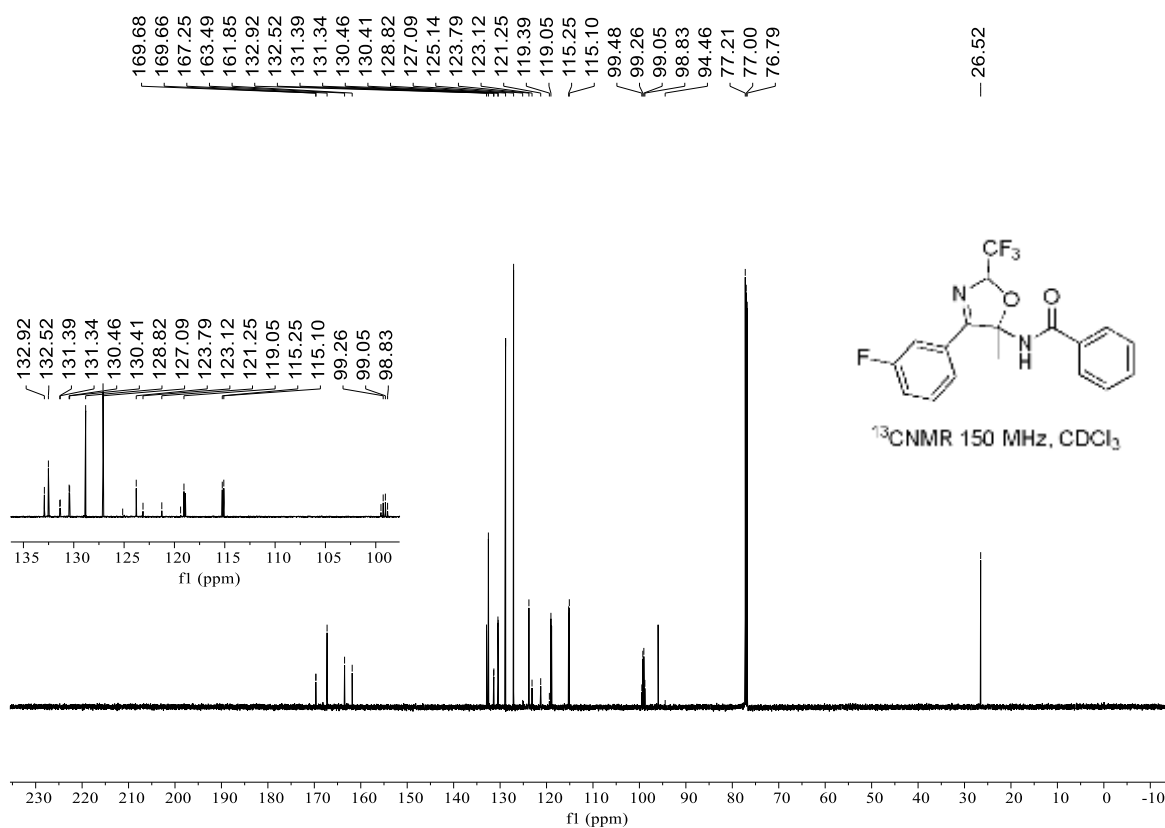

$^{19}\text{F}$  NMR (376 MHz) spectrum of **4f** in  $\text{CDCl}_3$

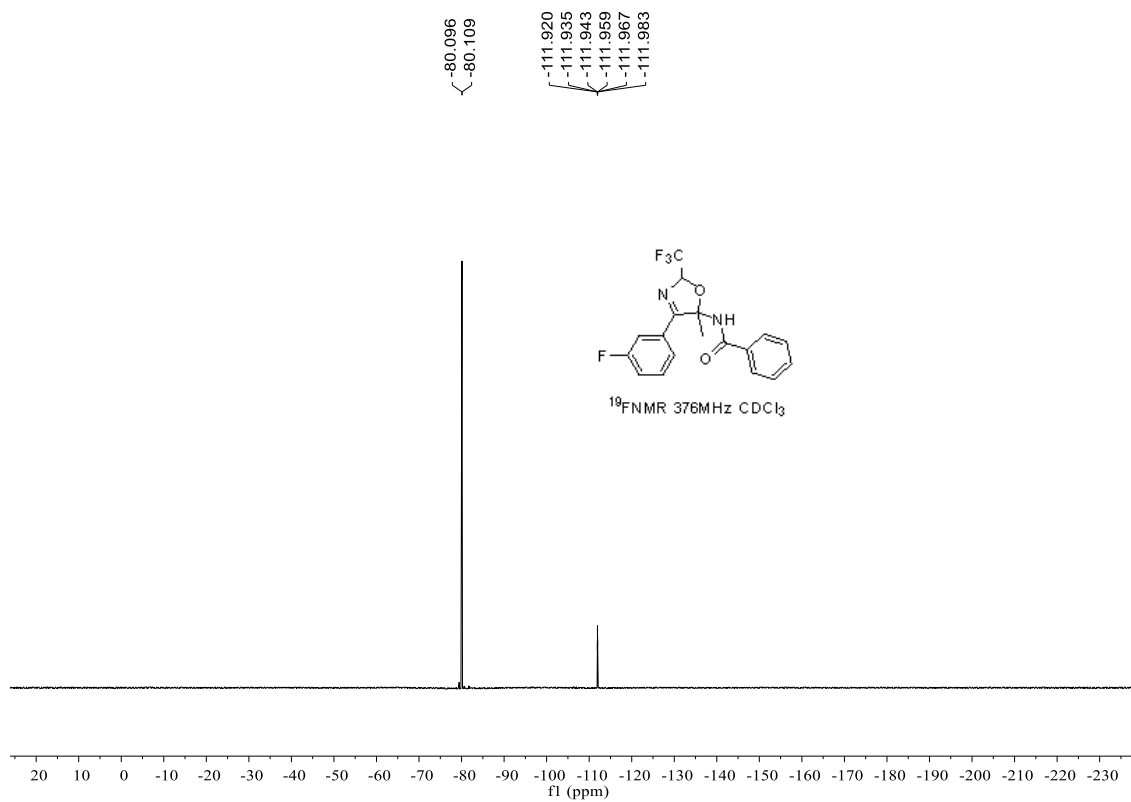



## HRMS(ESI) copy of compound **4f**:

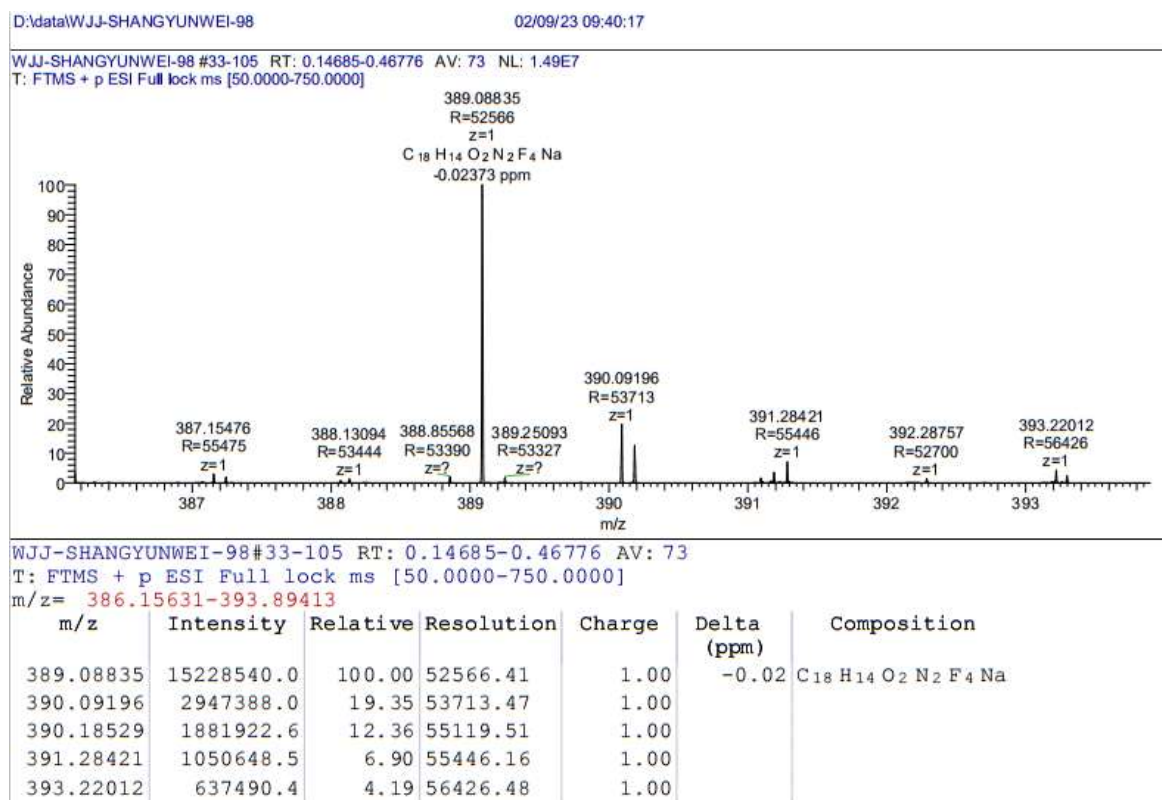

## NMR copies of compound **4g**

<sup>1</sup>H NMR (400 MHz) spectrum of **4g** in CDCl<sub>3</sub>

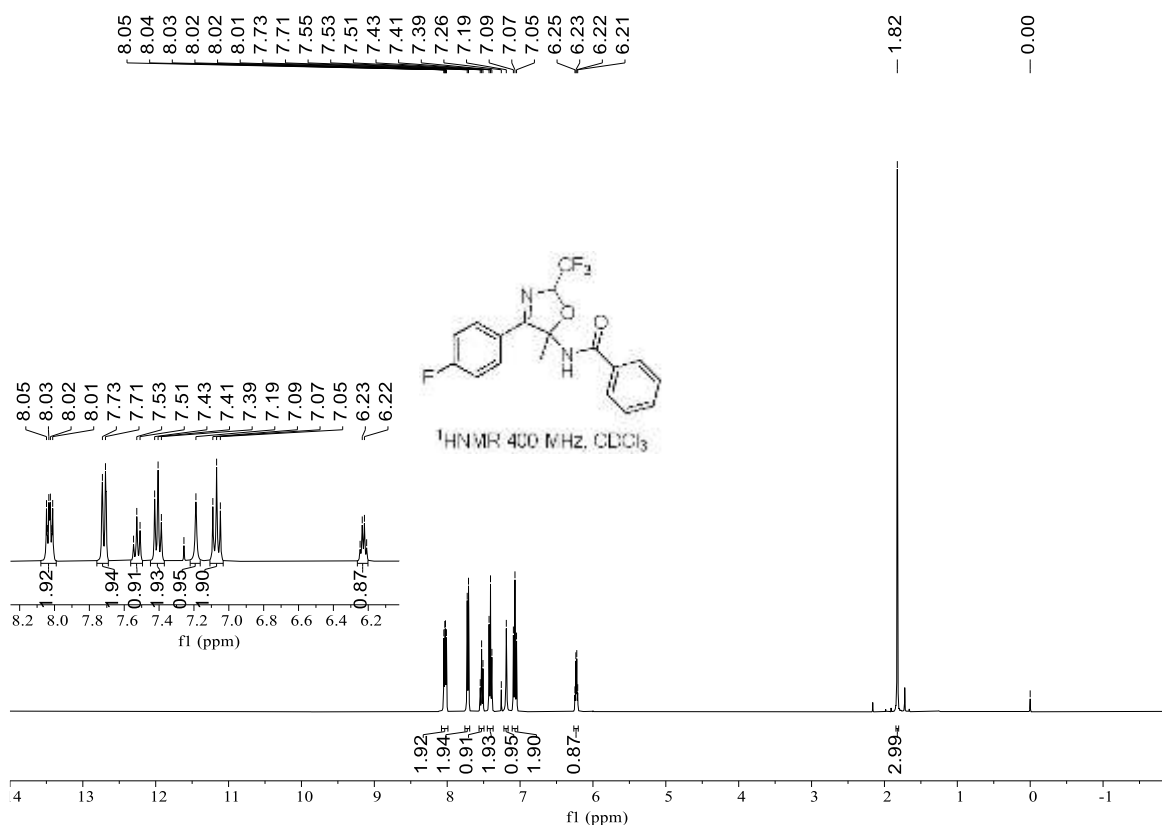

$^{13}\text{C}$  NMR (150 MHz) spectrum of **4g** in  $\text{CDCl}_3$

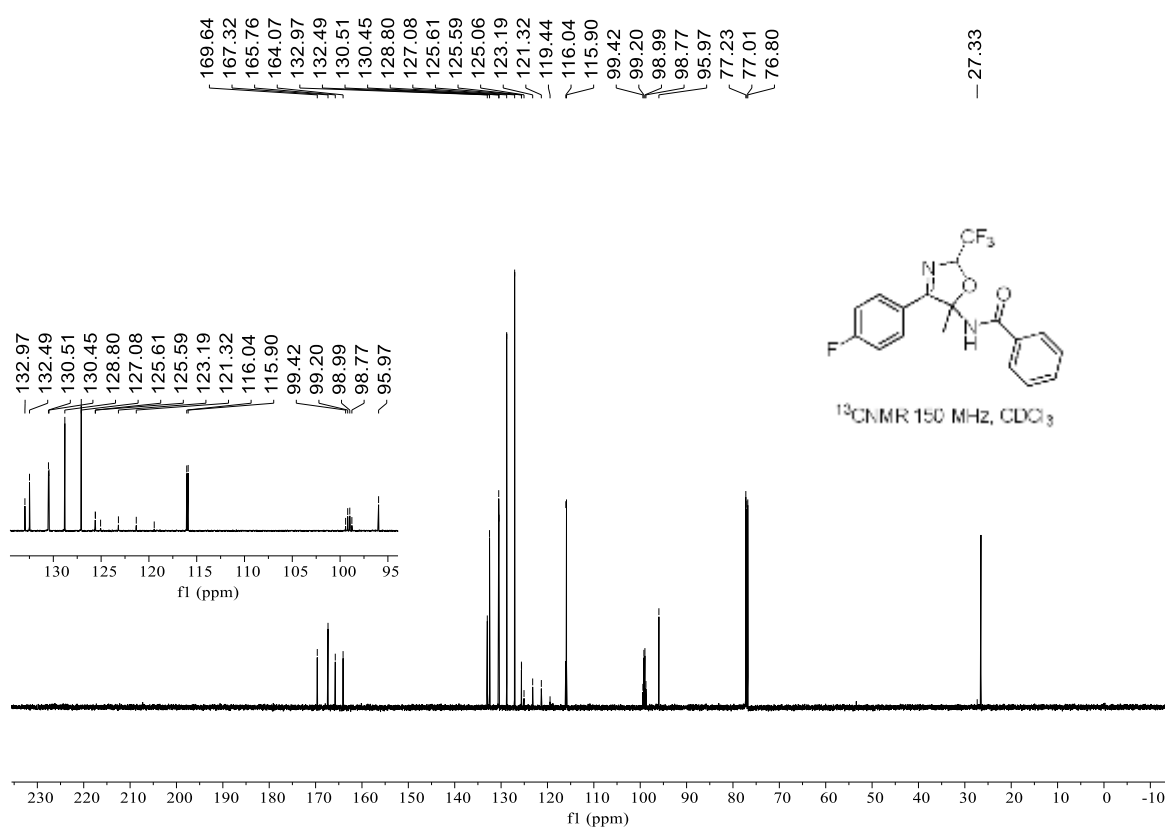

$^{19}\text{F}$  NMR (376 MHz) spectrum of **4g** in  $\text{CDCl}_3$

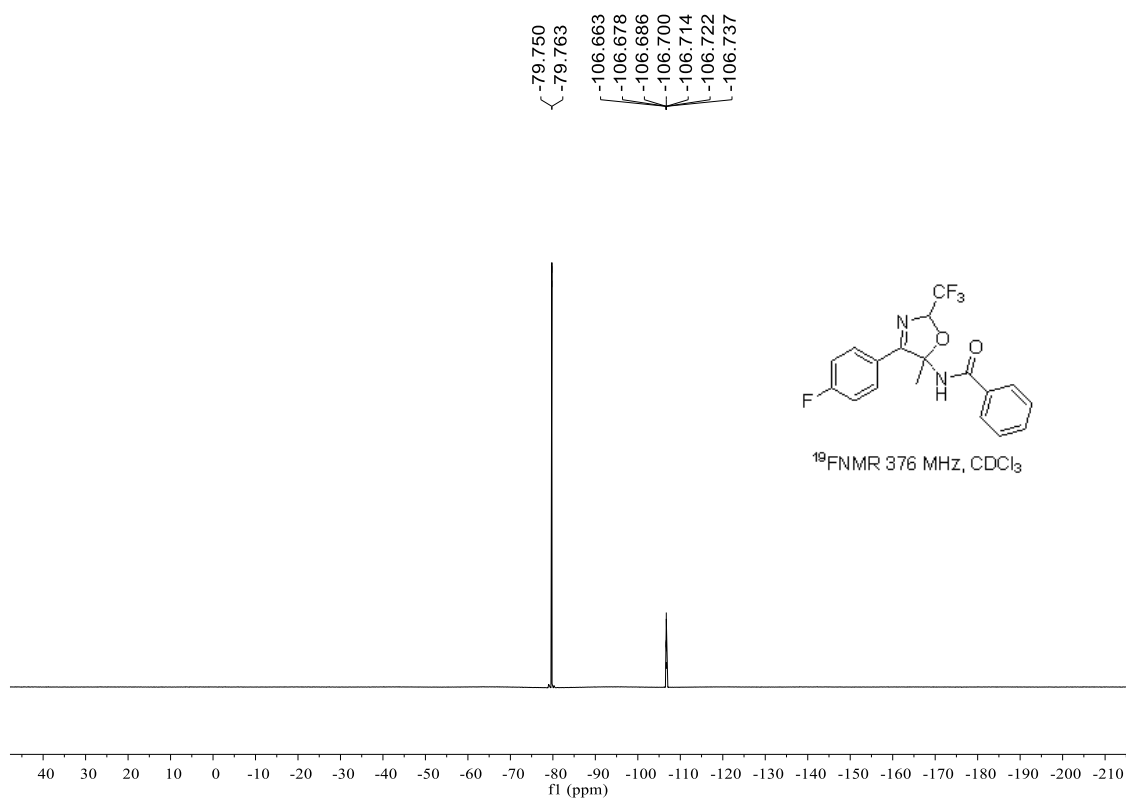

## HRMS(ESI) copy of compound **4g**:

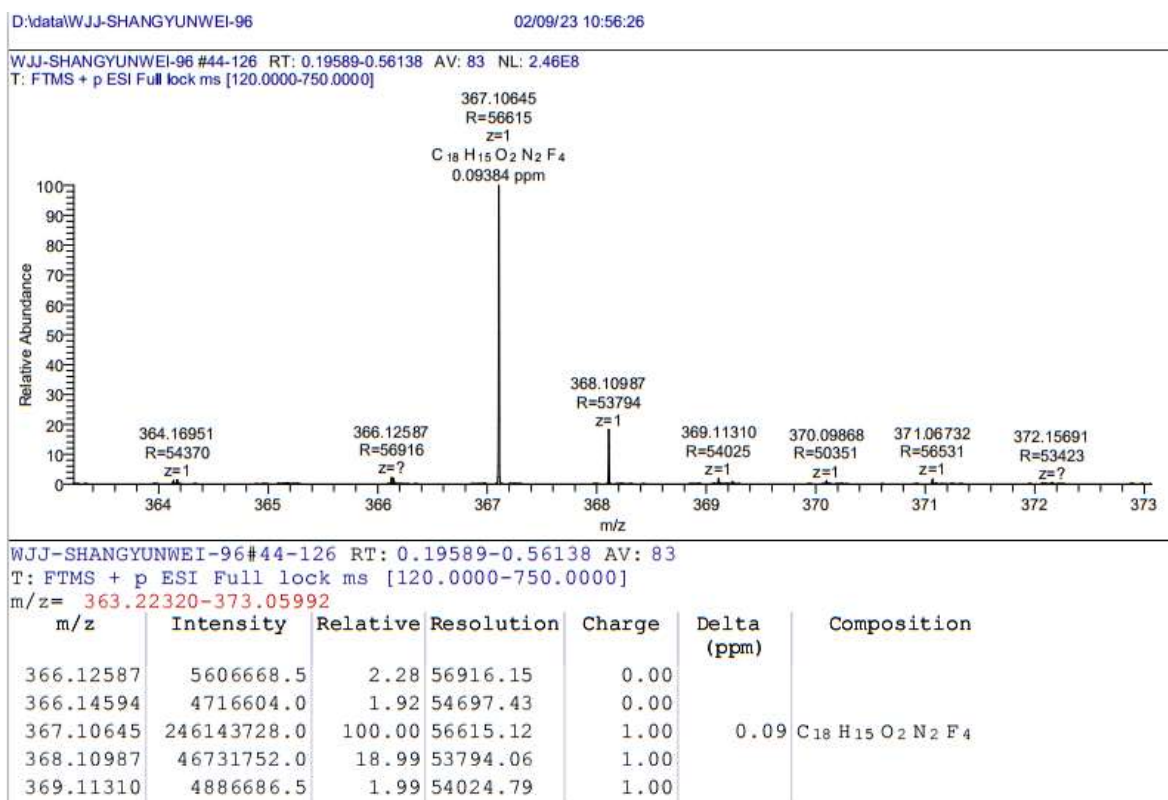

## NMR copies of compound **4h**

<sup>1</sup>H NMR (400 MHz) spectrum of **4h** in CDCl<sub>3</sub>

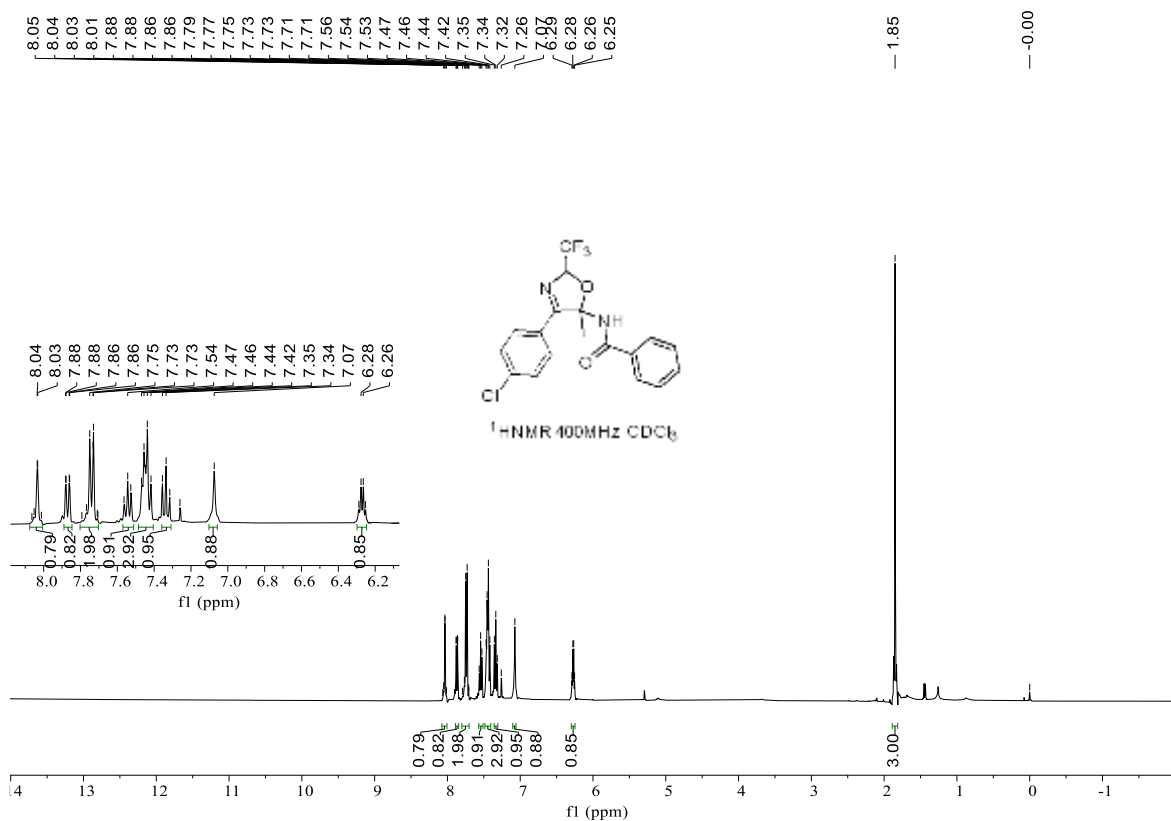

$^{13}\text{C}$  NMR (150 MHz) spectrum of **4h** in  $\text{CDCl}_3$

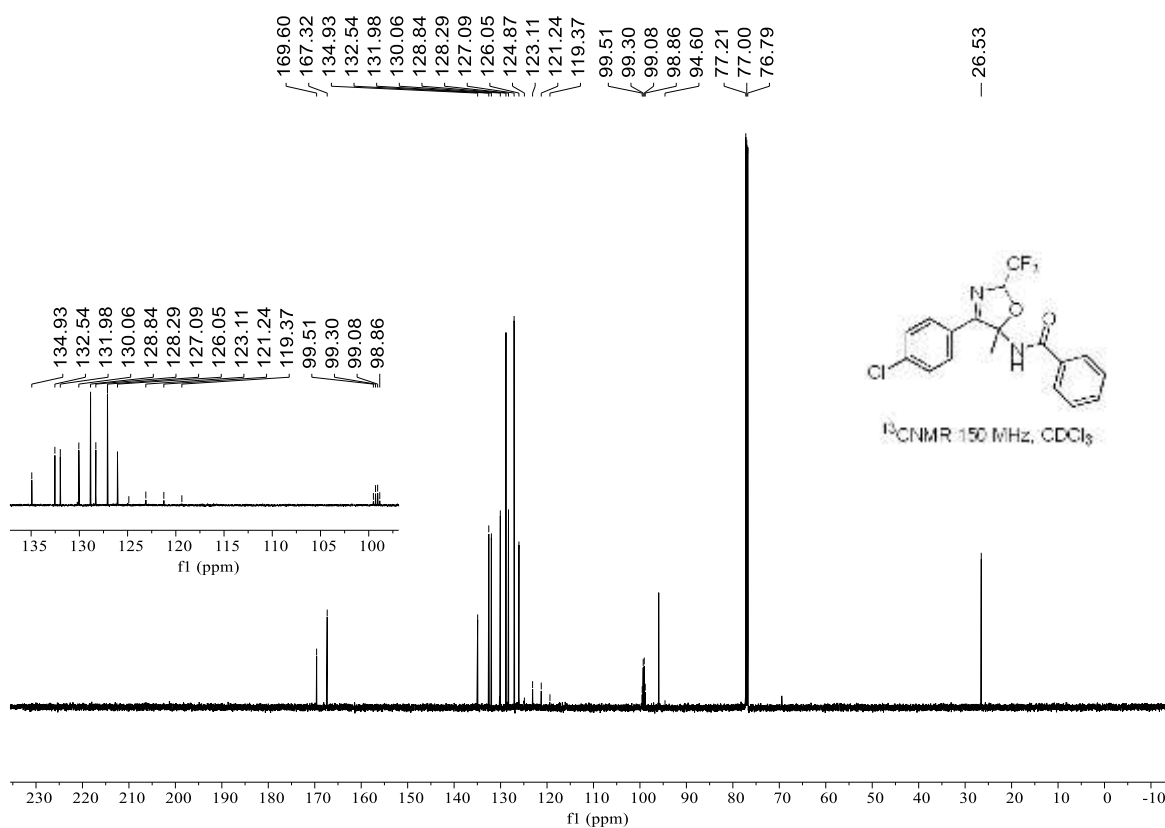

$^{19}\text{F}$  NMR (376 MHz) spectrum of **4h** in  $\text{CDCl}_3$

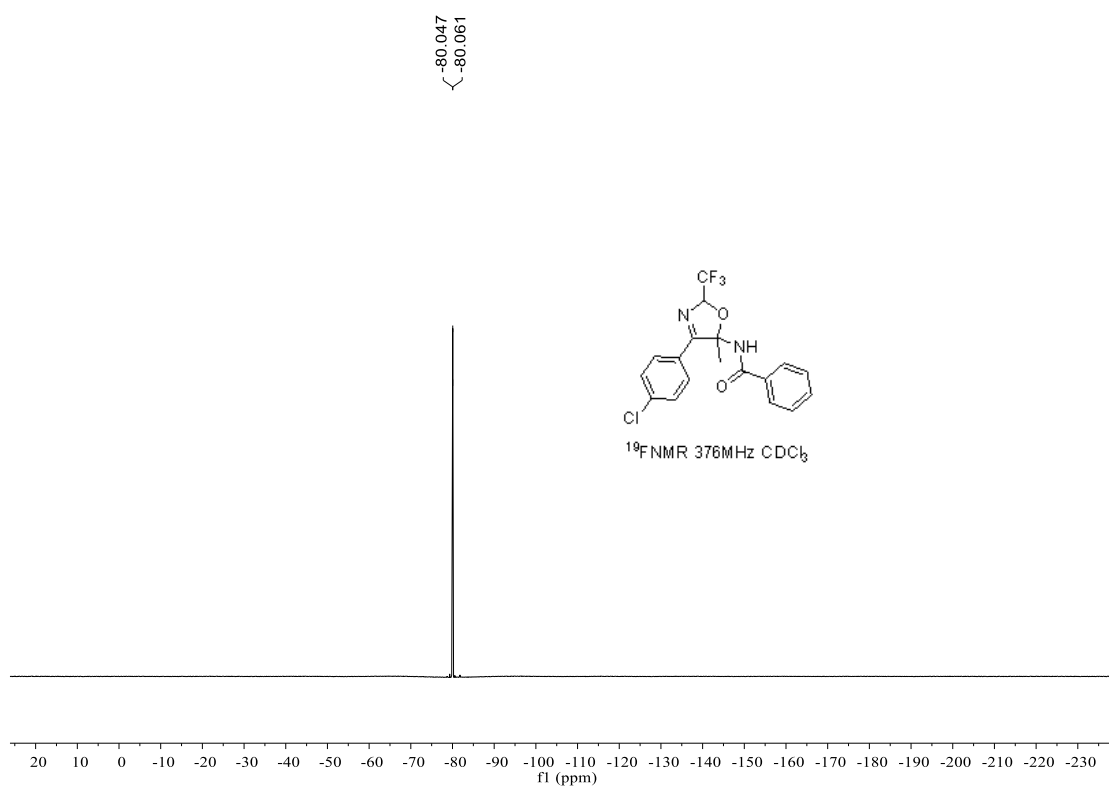

### HRMS(ESI) copy of compound **4h**:

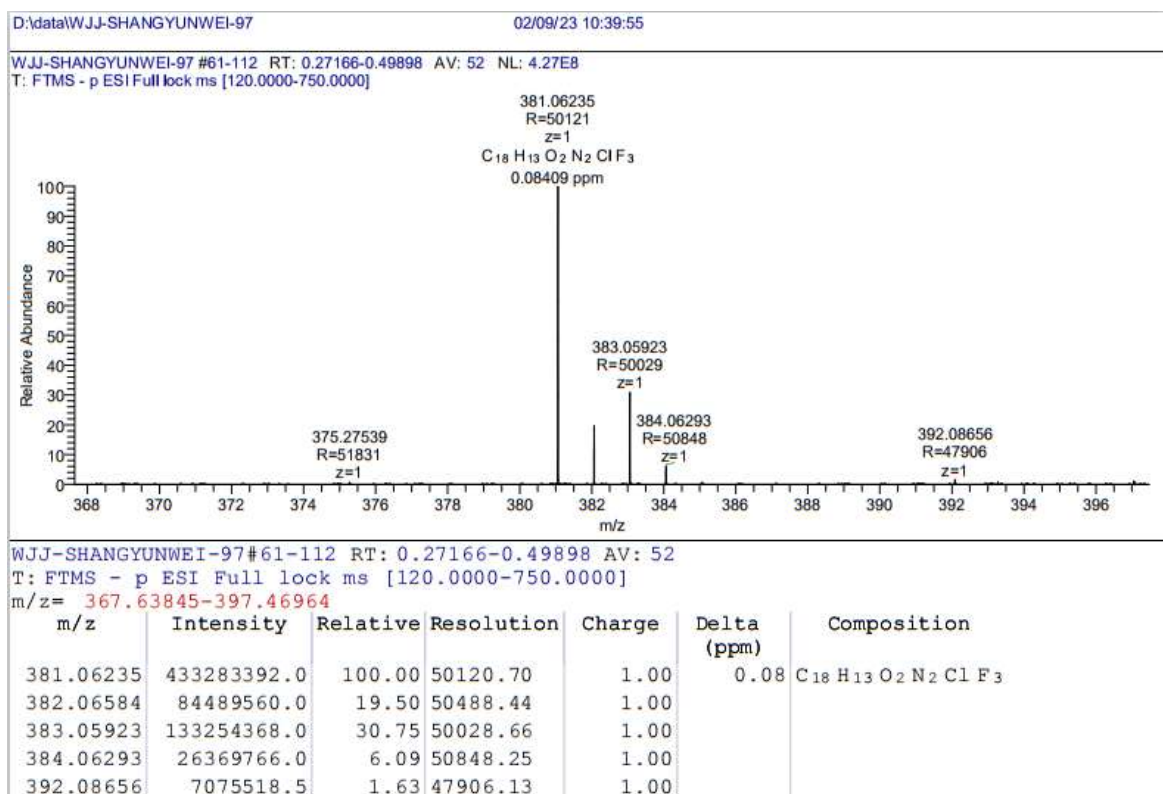

### NMR copies of compound **4i**

<sup>1</sup>H NMR (400 MHz) spectrum of **4i** in CDCl<sub>3</sub>

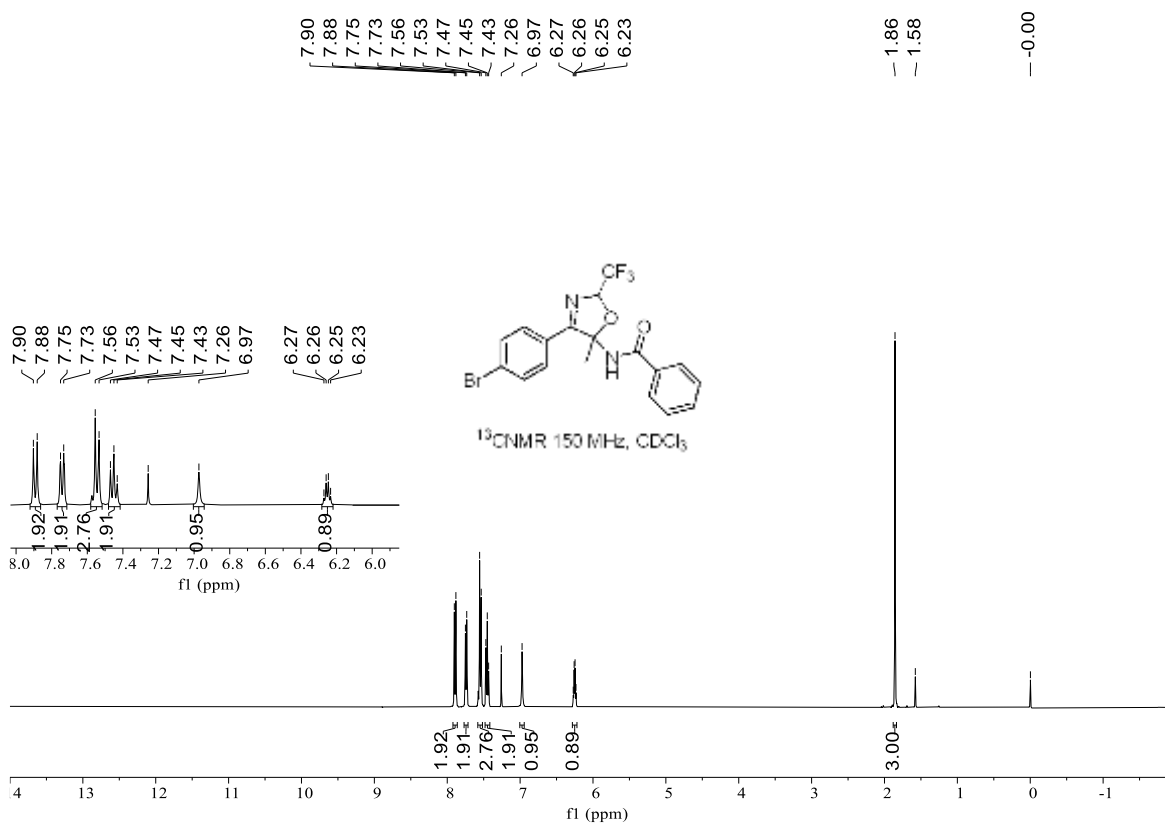

$^{13}\text{C}$  NMR (150 MHz) spectrum of **4i** in  $\text{CDCl}_3$

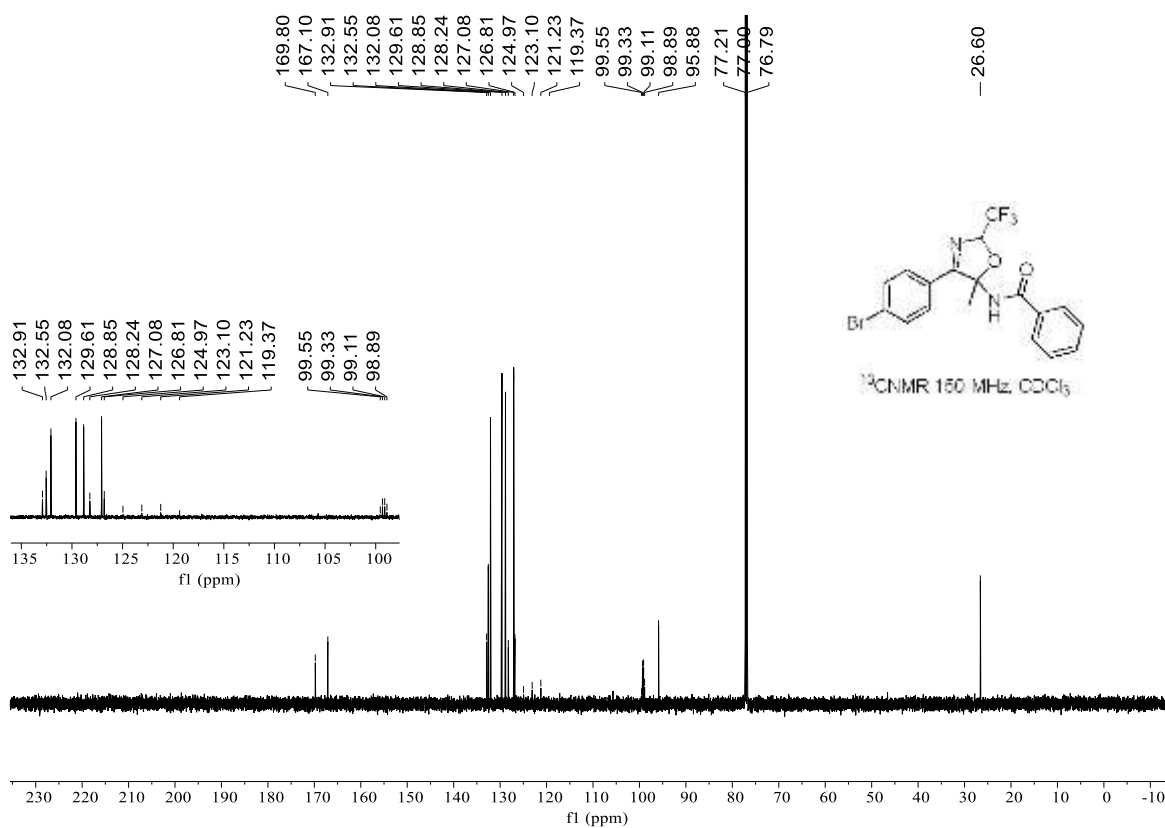

$^{19}\text{F}$  NMR (376 MHz) spectrum of **4i** in  $\text{CDCl}_3$

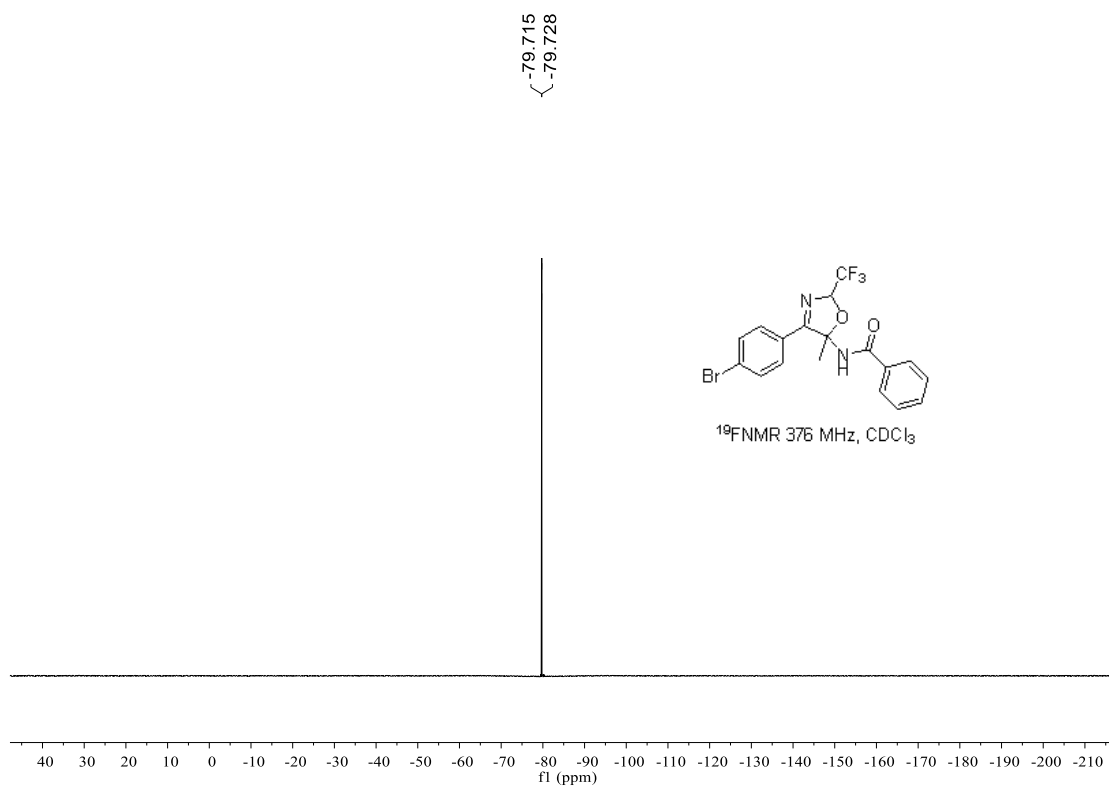

# HRMS(ESI) copy of compound 4i:

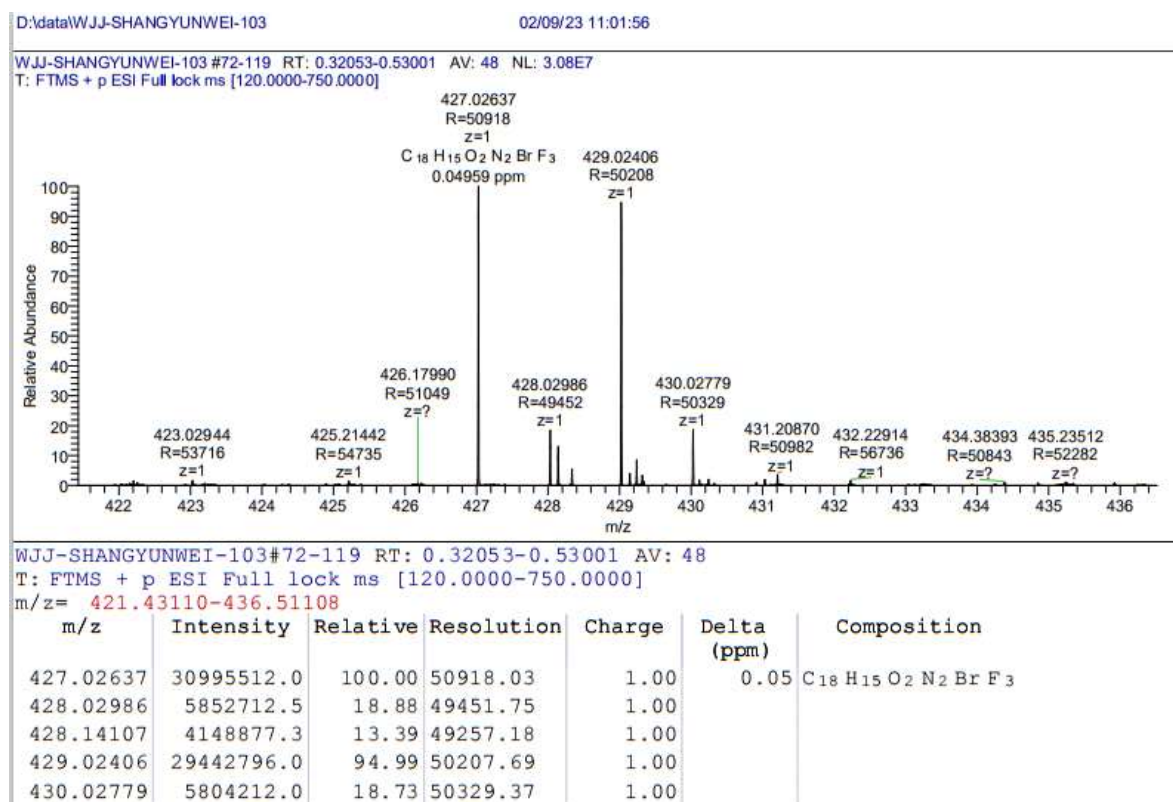

# NMR copies of compound 4j

<sup>1</sup>H NMR (400 MHz) spectrum of 4j in CDCl<sub>3</sub>

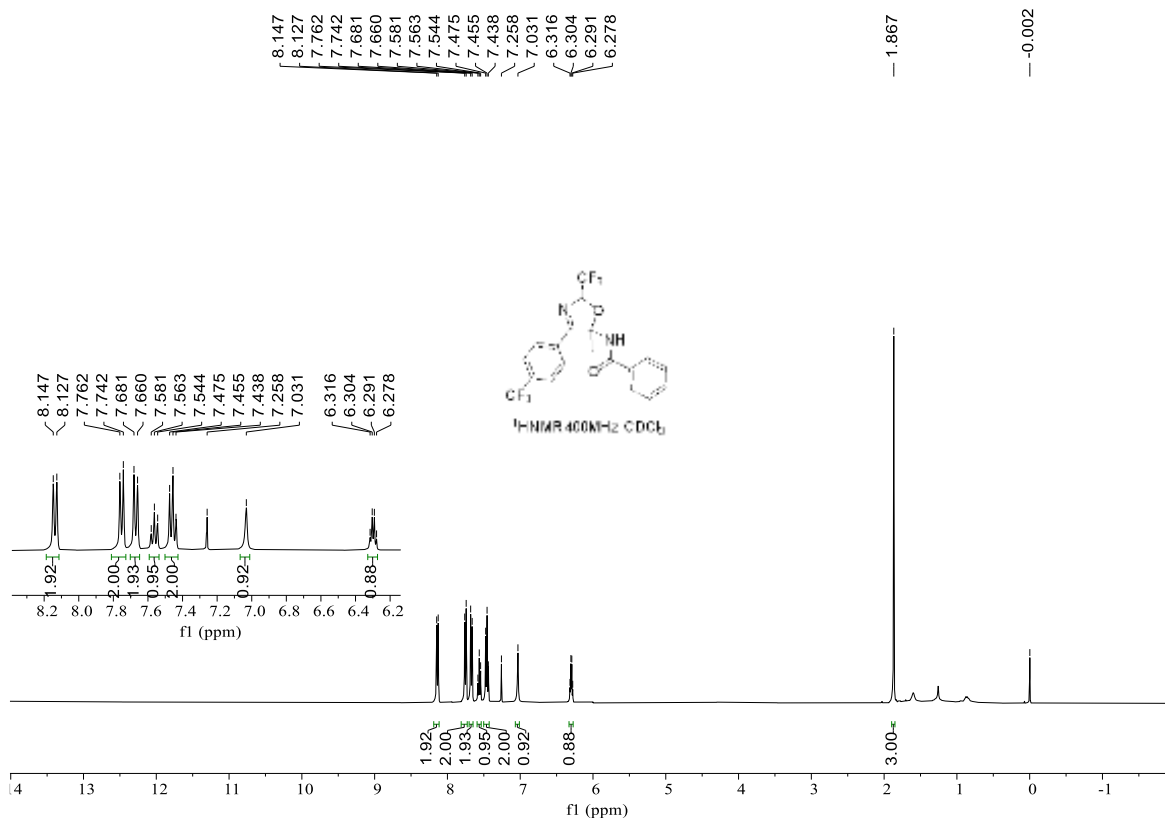

$^{13}\text{C}$  NMR (150 MHz) spectrum of **4j** in  $\text{CDCl}_3$

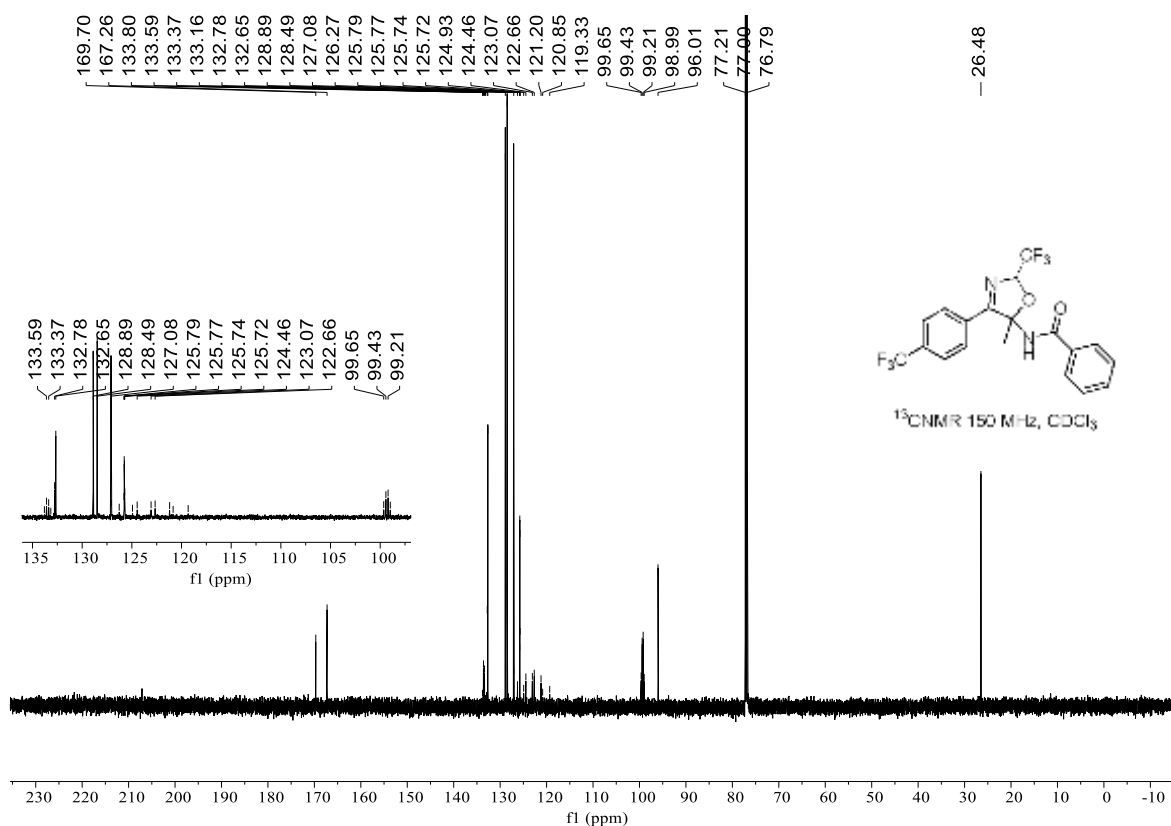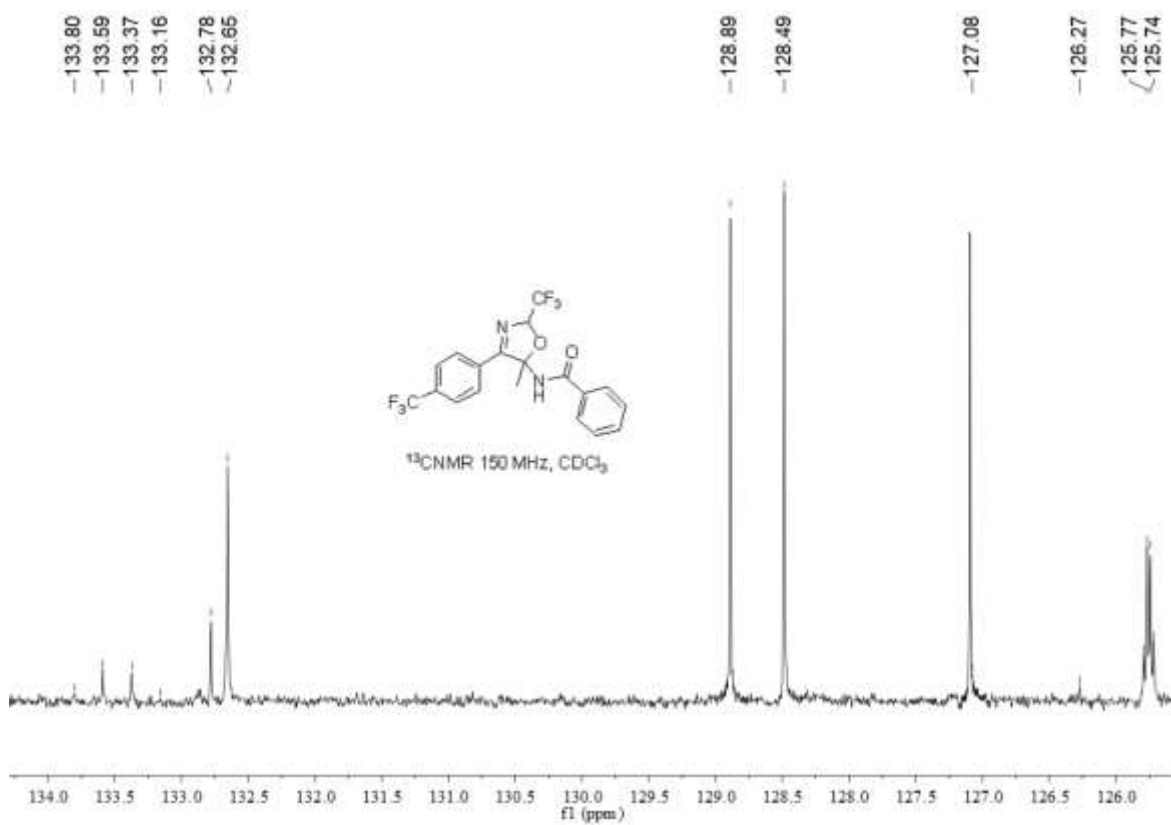



$^{19}\text{F}$  NMR (376 MHz) spectrum of **4j** in  $\text{CDCl}_3$

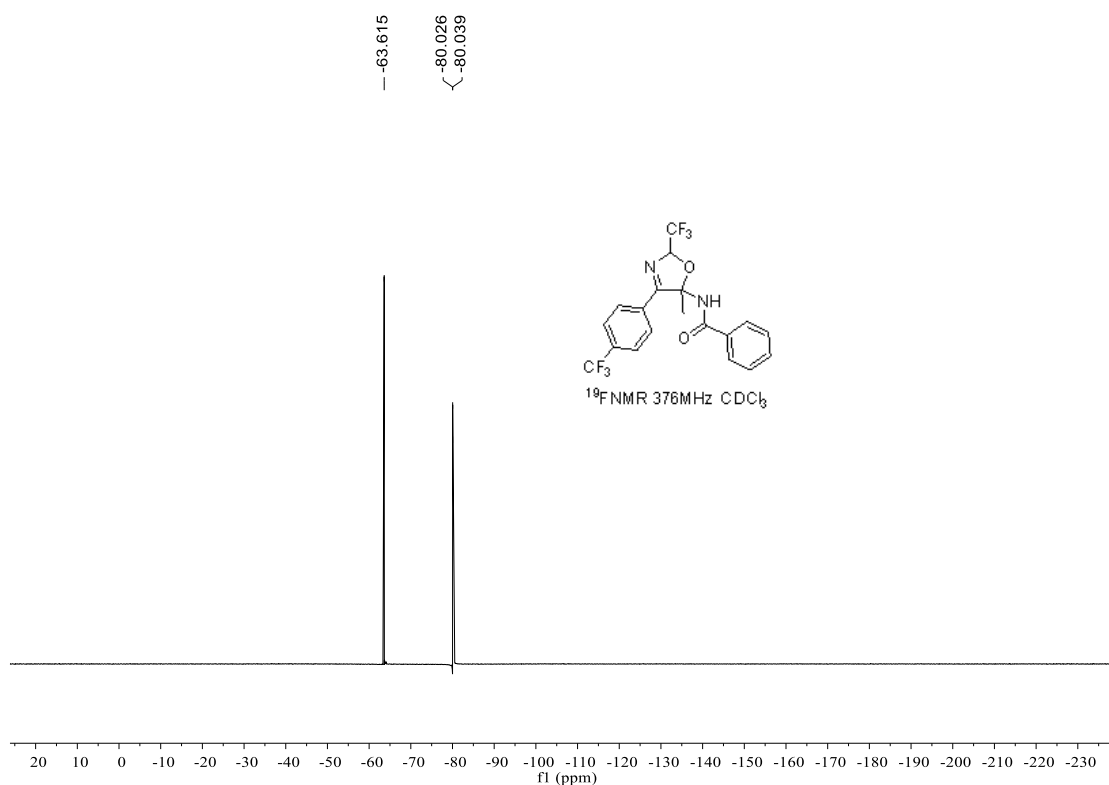

HRMS(ESI) copy of compound **4j**:

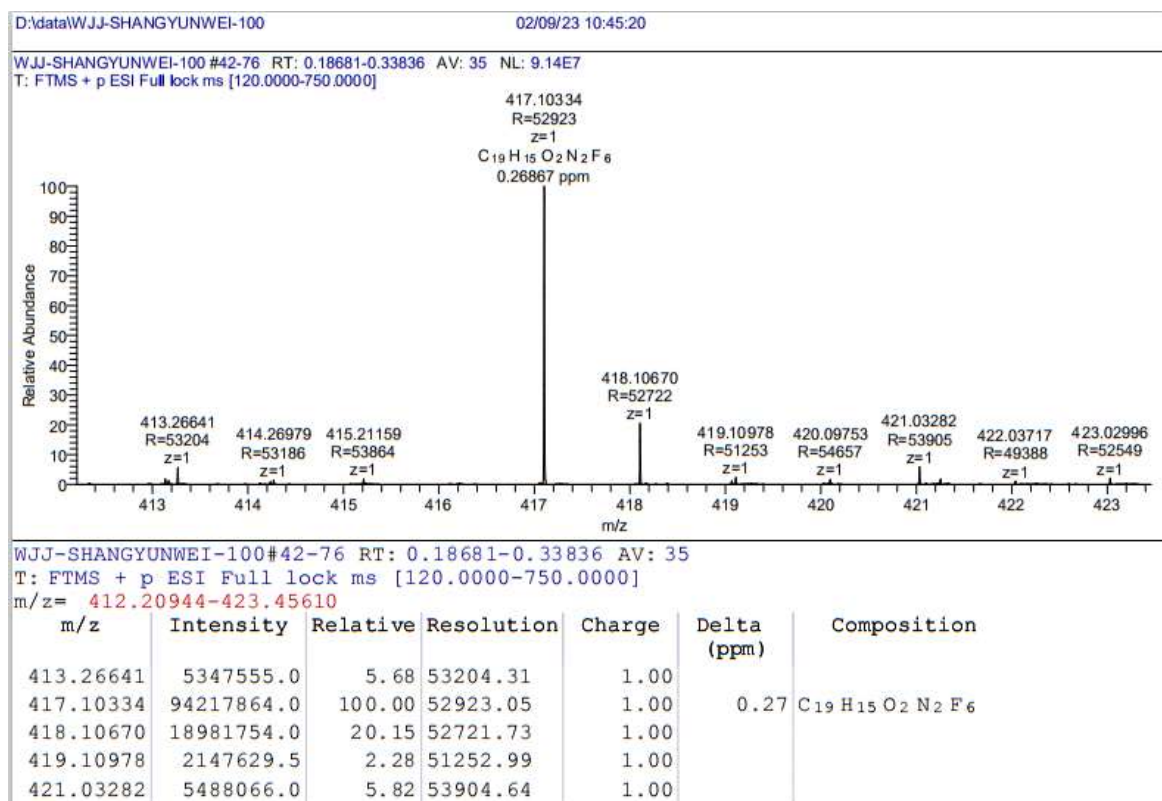

NMR copies of compound **4l**

$^1\text{H}$  NMR (400 MHz) spectrum of **4l** in  $\text{CDCl}_3$

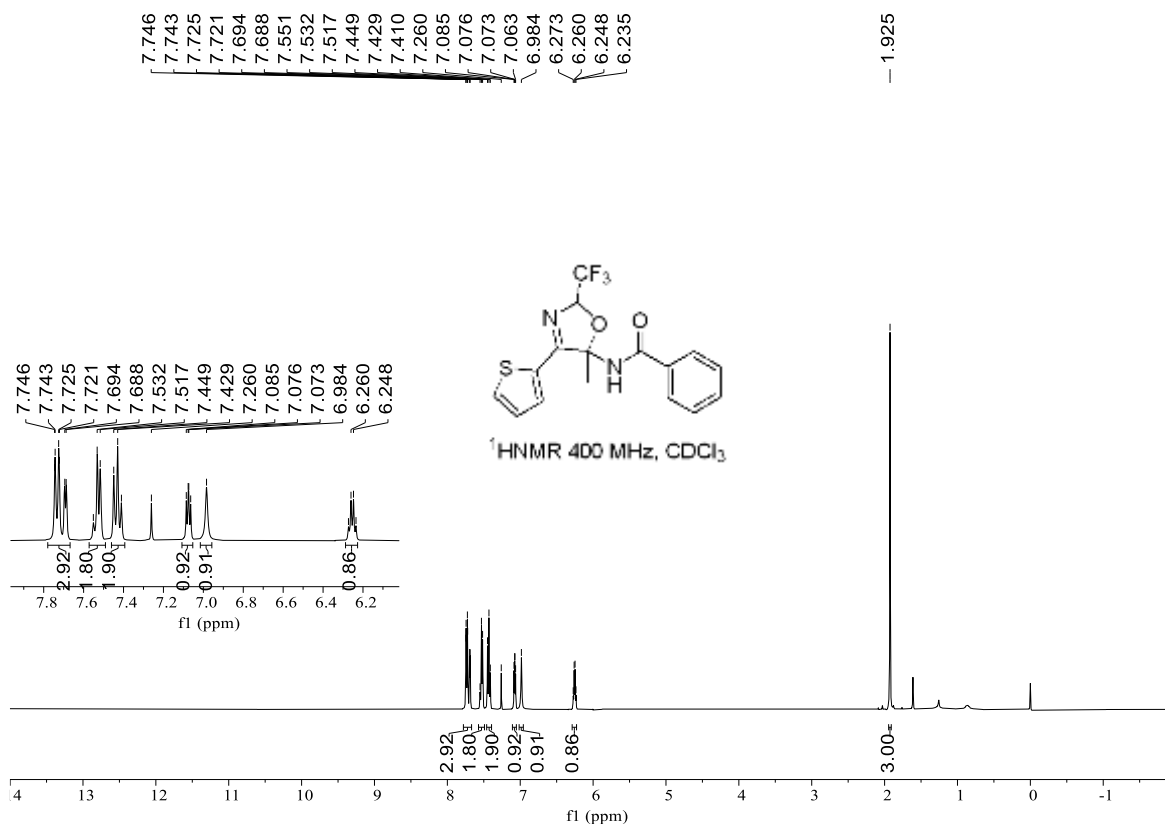

$^{13}\text{C}$  NMR (150 MHz) spectrum of **4l** in  $\text{CDCl}_3$

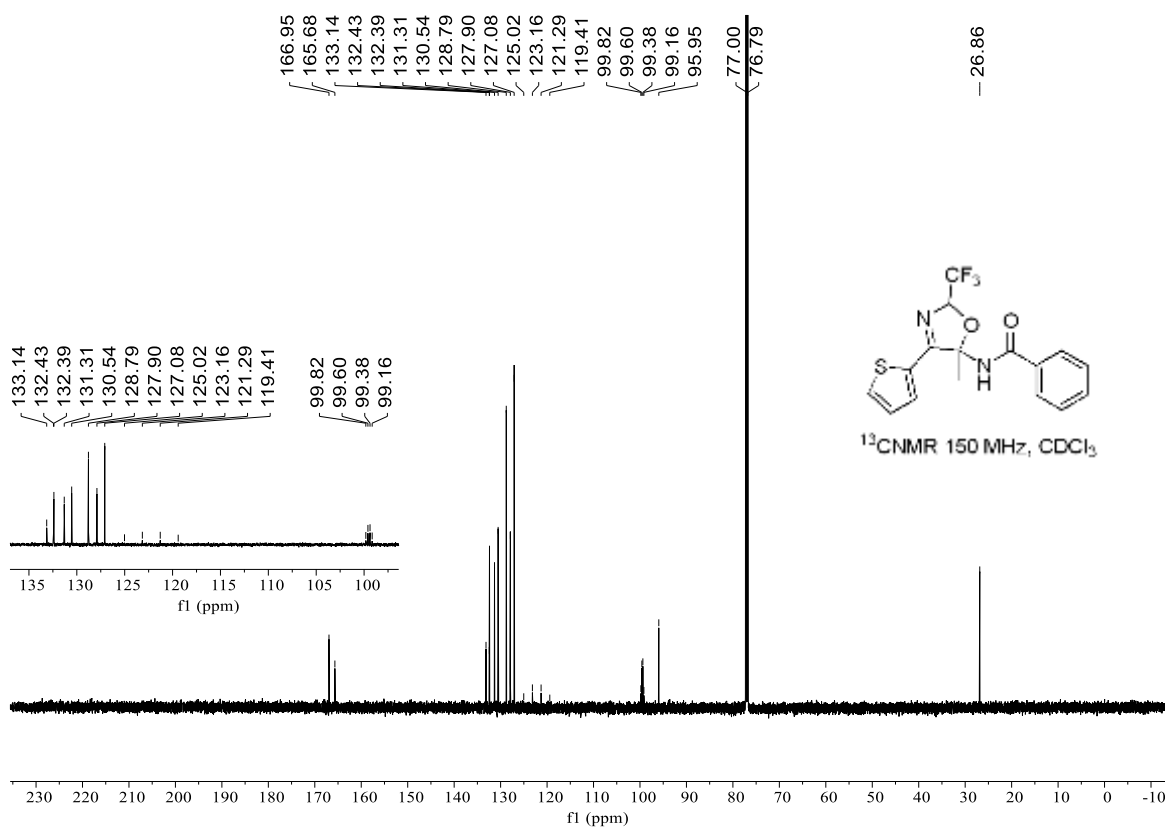

$^{19}\text{F}$  NMR (376 MHz) spectrum of **4l** in  $\text{CDCl}_3$

-79.664  
-79.678

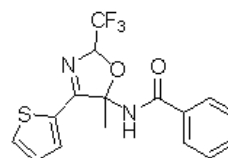

$^{19}\text{F}$ NMR 376 MHz,  $\text{CDCl}_3$

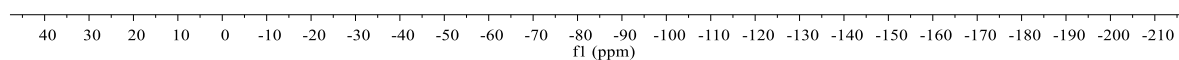

HRMS(ESI) copy of compound **4l**:

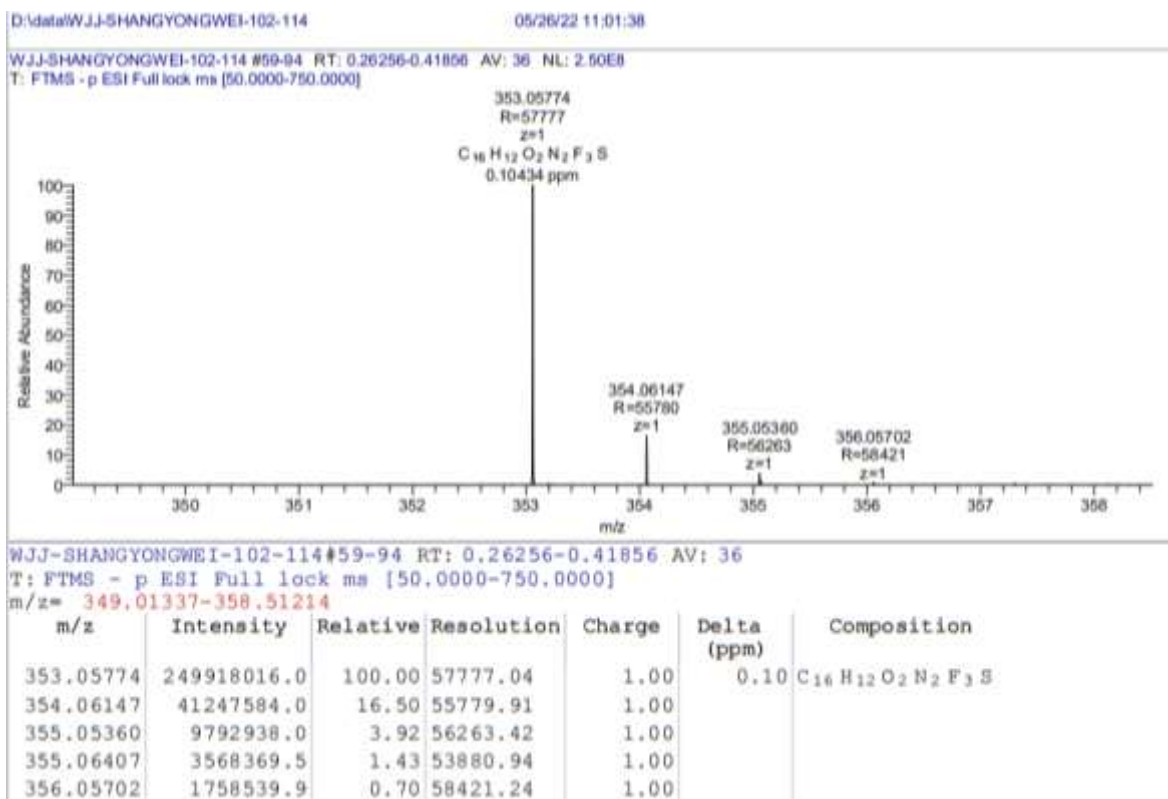

NMR copies of compound **4m**

$^1\text{H}$  NMR (400 MHz) spectrum of **4m** in  $\text{CDCl}_3$

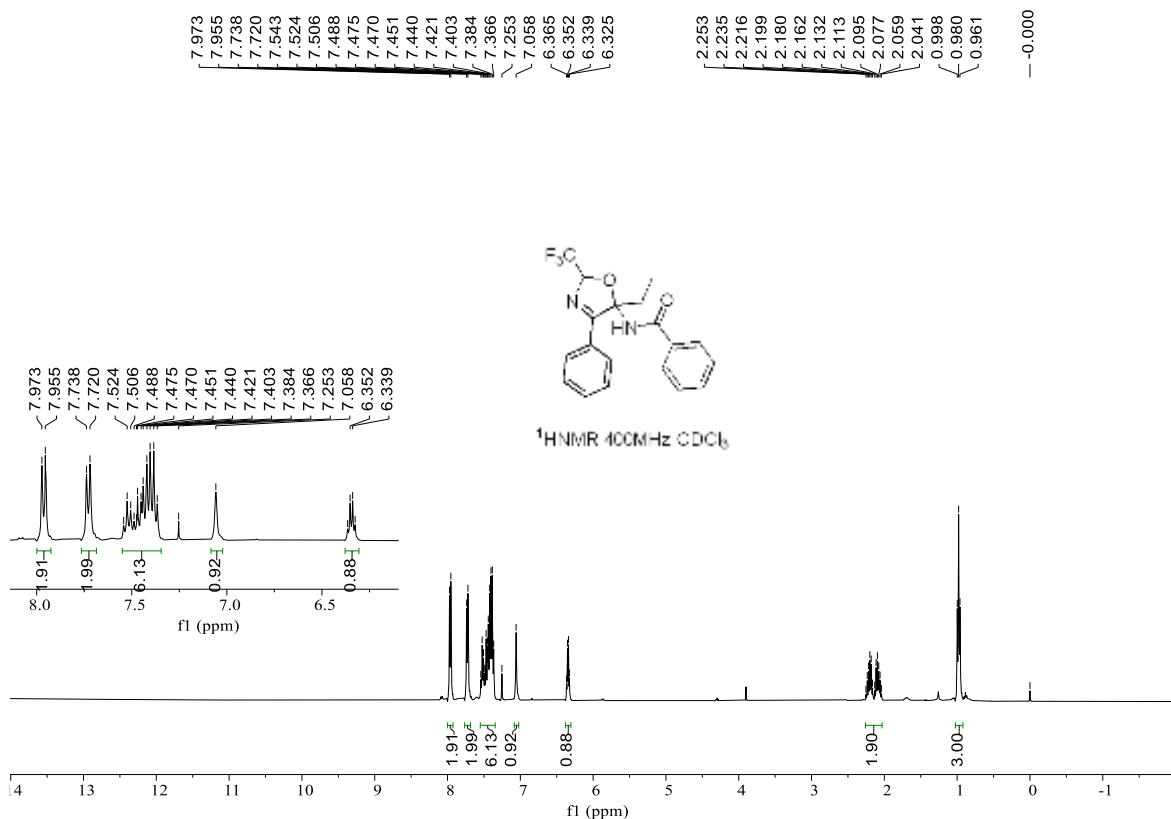

$^{13}\text{C}$  NMR (150 MHz) spectrum of **4m** in  $\text{CDCl}_3$

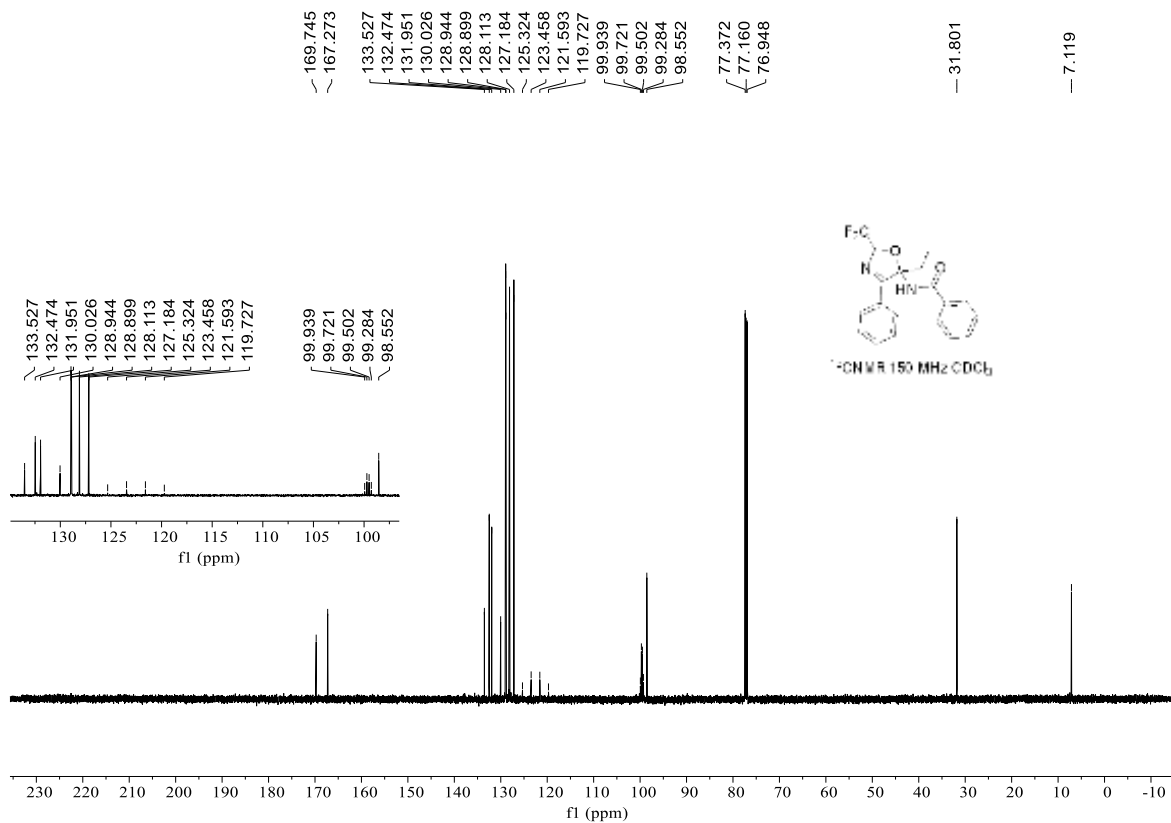

<sup>19</sup>F NMR (376 MHz) spectrum of **4m** in CDCl<sub>3</sub>

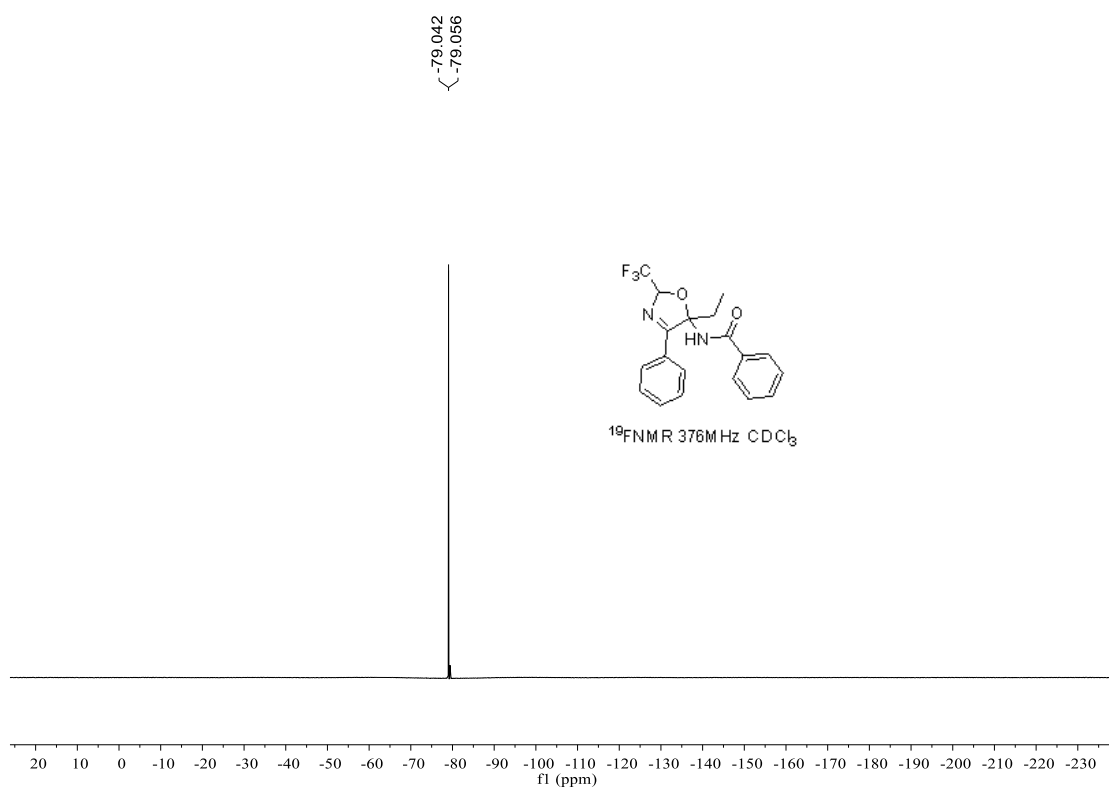

HRMS(ESI) copy of compound **4m**:

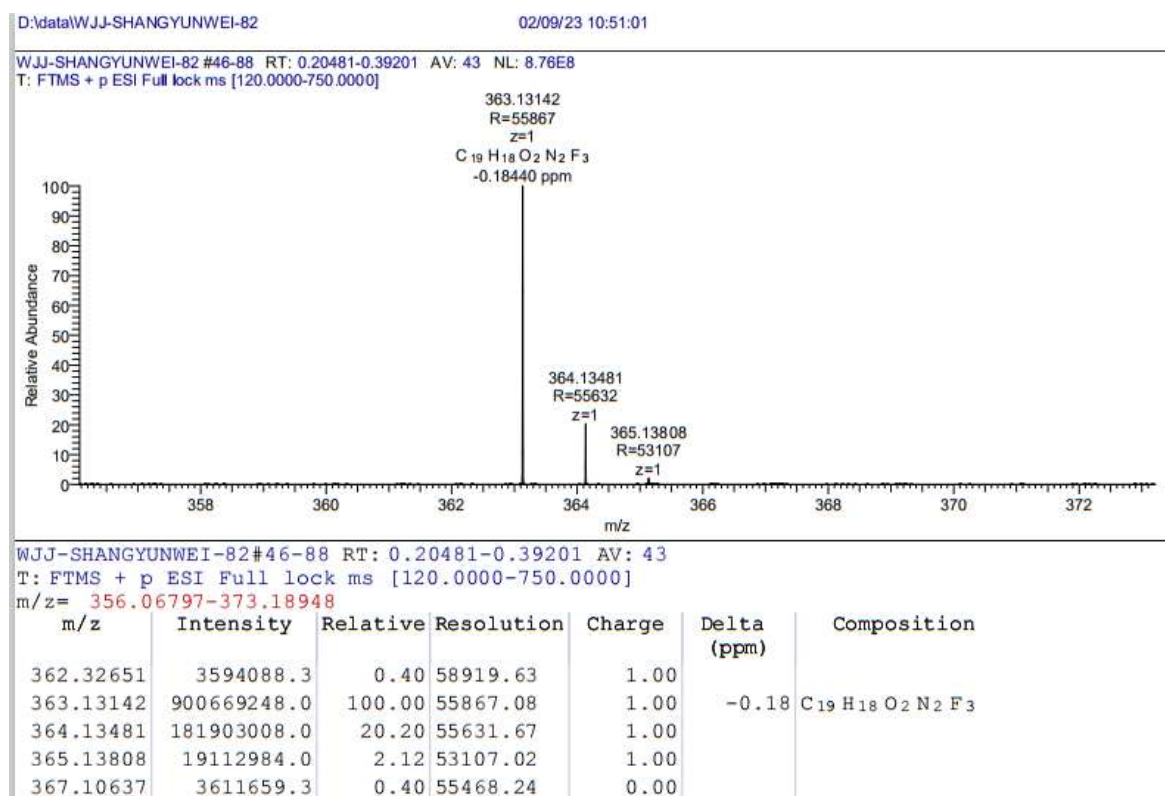

NMR copies of compound **4n**

$^1\text{H}$  NMR (400 MHz) spectrum of **4n** in  $\text{CDCl}_3$

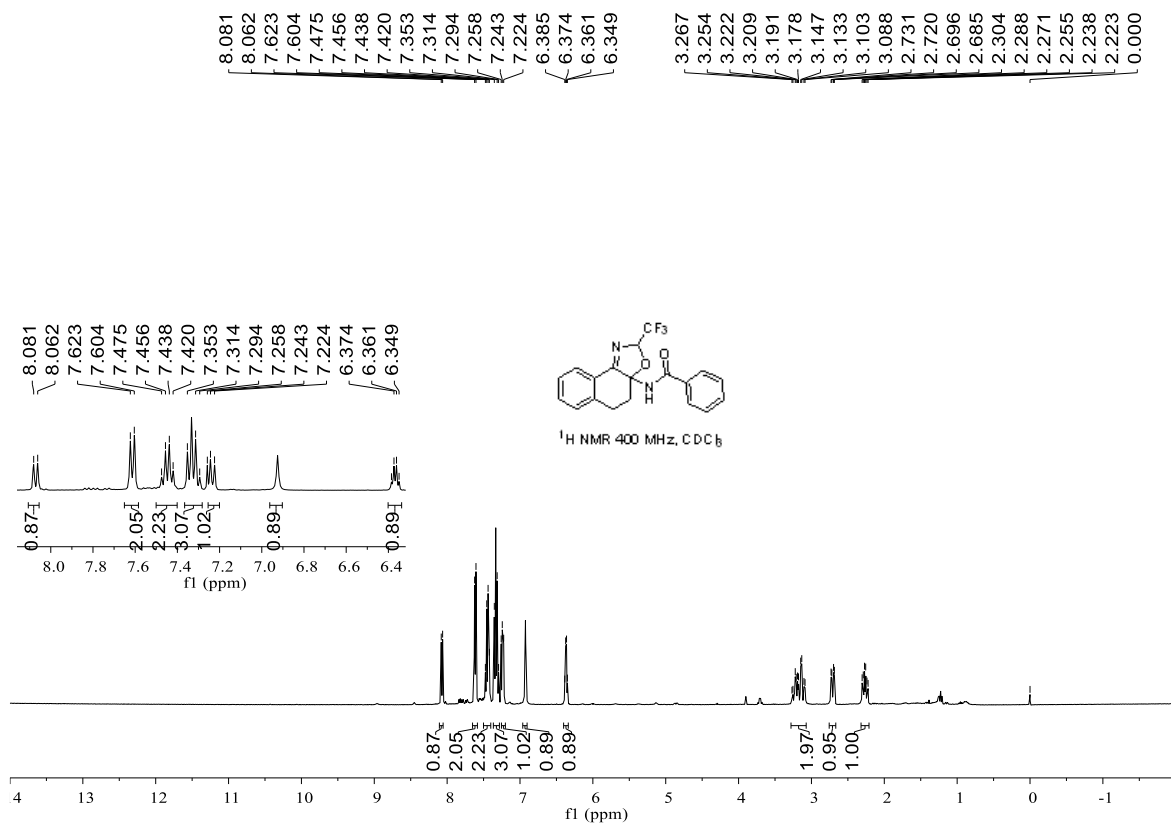

$^{13}\text{C}$  NMR (150 MHz) spectrum of **4n** in  $\text{CDCl}_3$

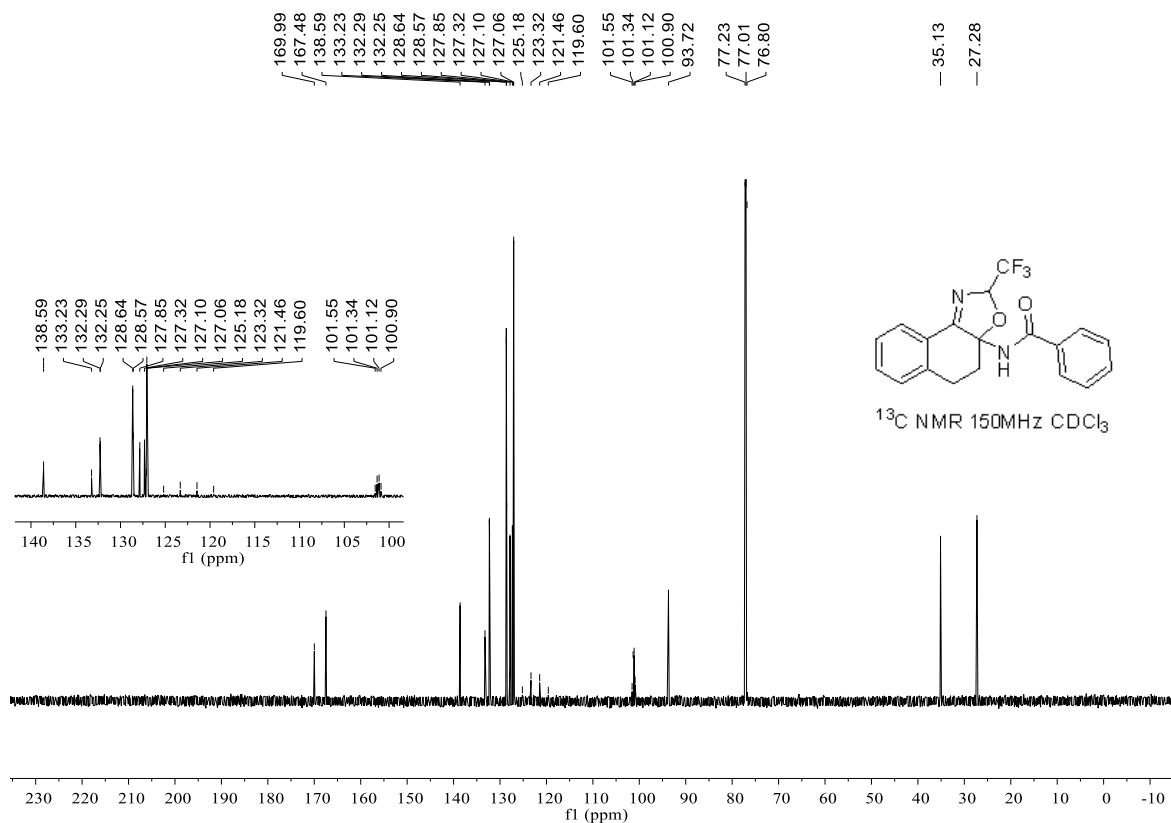

$^{19}\text{F}$  NMR (376 MHz) spectrum of **4n** in  $\text{CDCl}_3$

$\delta$  -79.832  
 $\delta$  -79.844

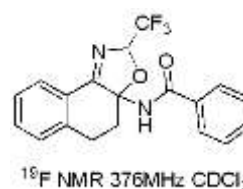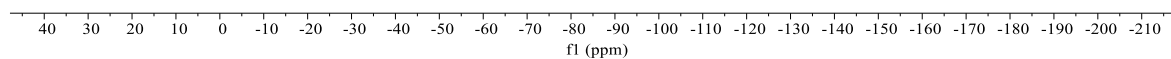

HRMS(ESI) copy of compound **4n**:

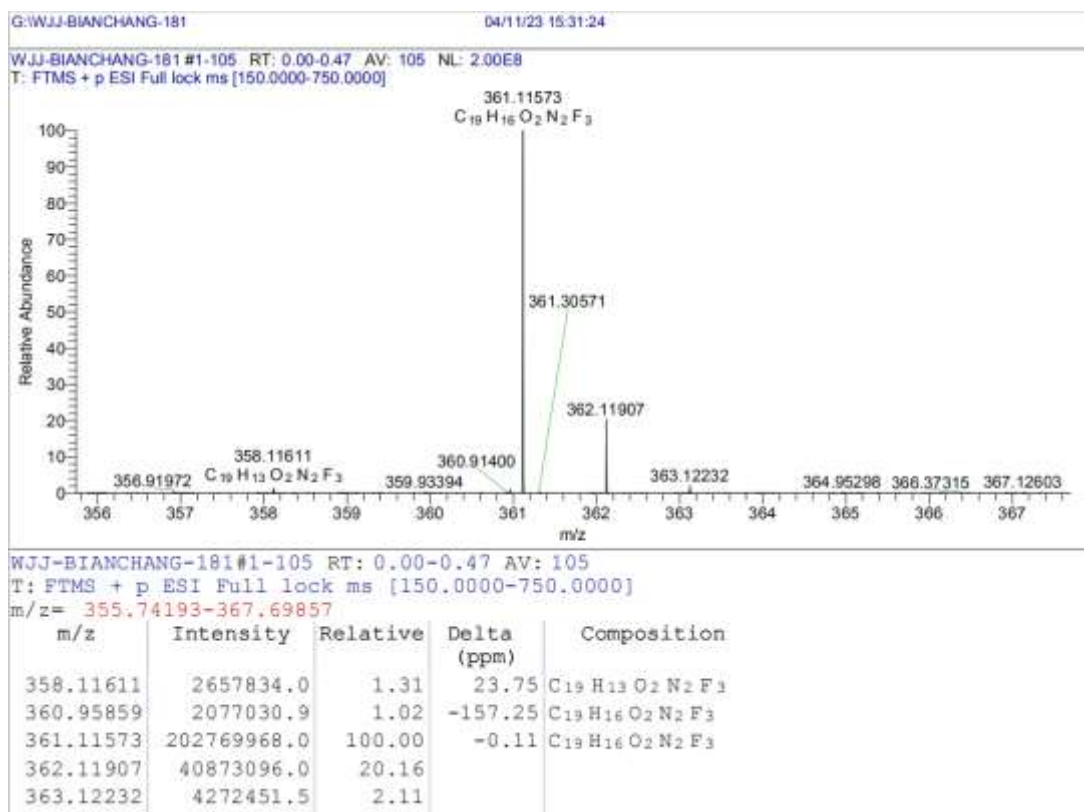

NMR copies of compound **5**

$^1\text{H}$  NMR (400 MHz) spectrum of **5** in  $\text{CDCl}_3$

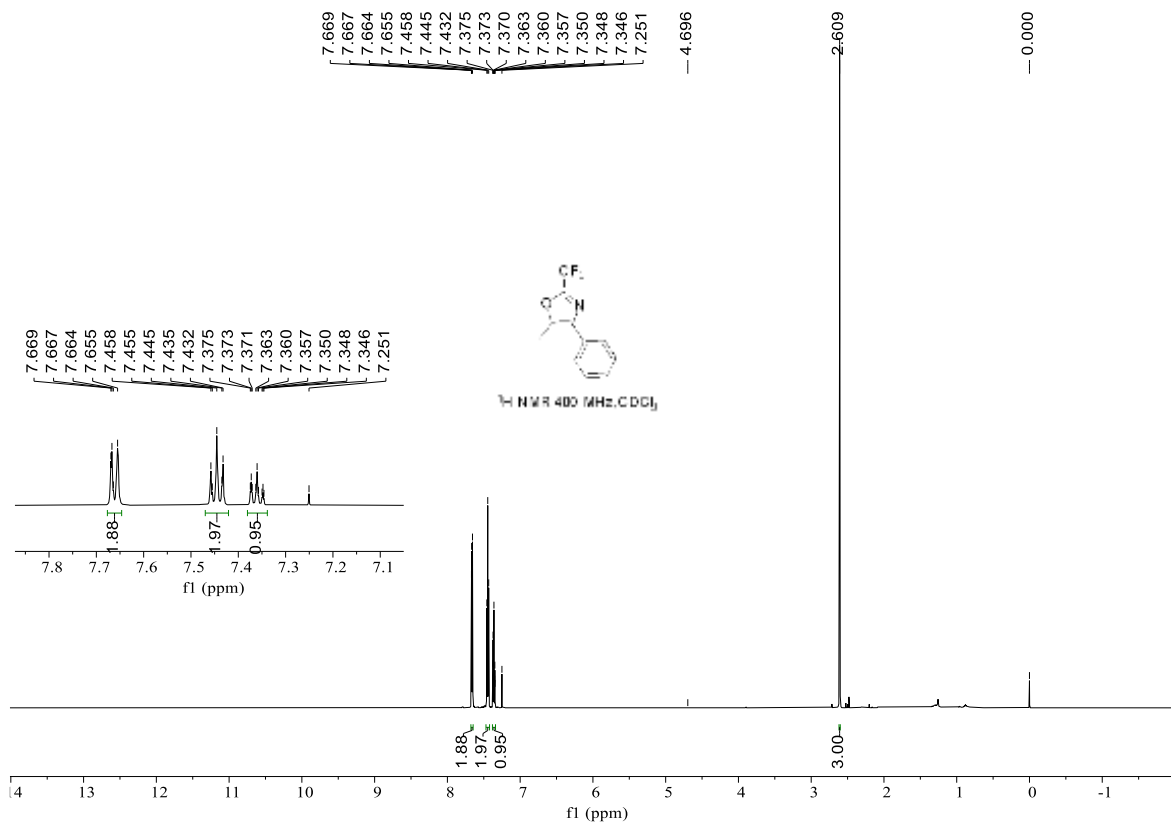

$^{13}\text{C}$  NMR (150 MHz) spectrum of **5** in  $\text{CDCl}_3$

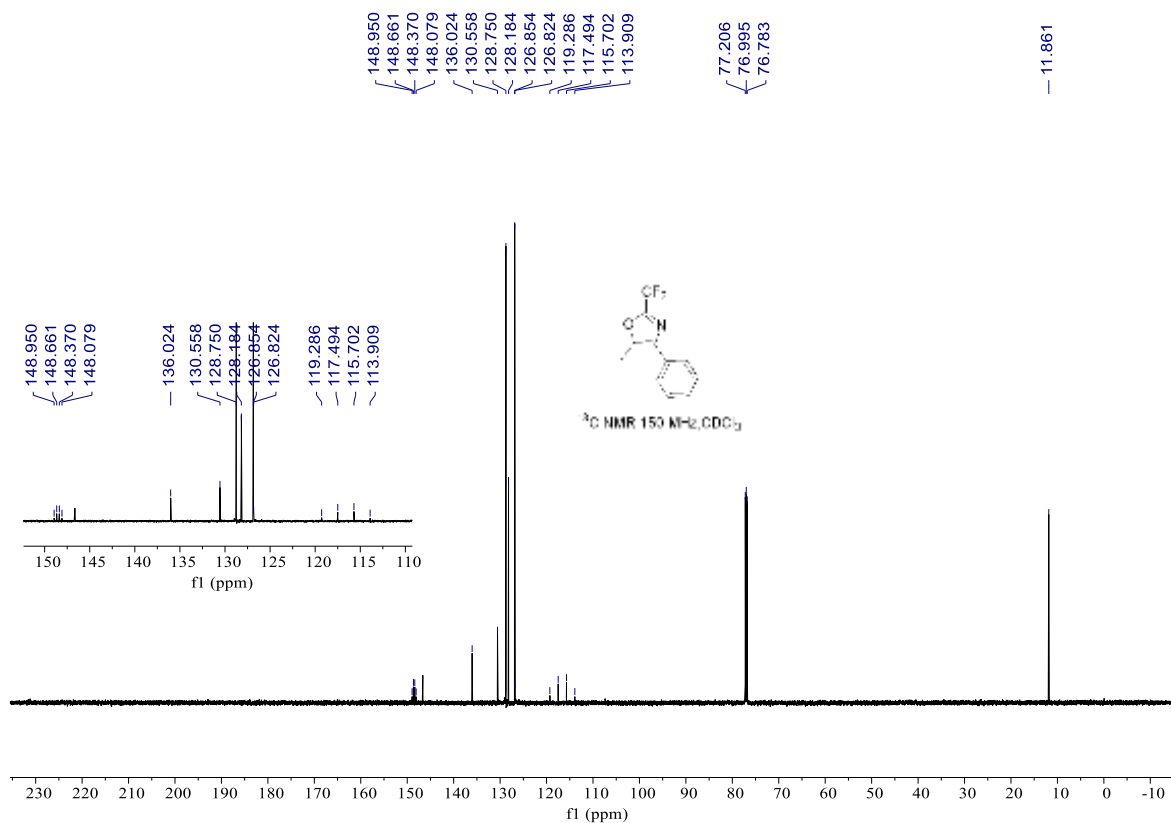



$^{19}\text{F}$  NMR (376 MHz) spectrum of **5** in  $\text{CDCl}_3$

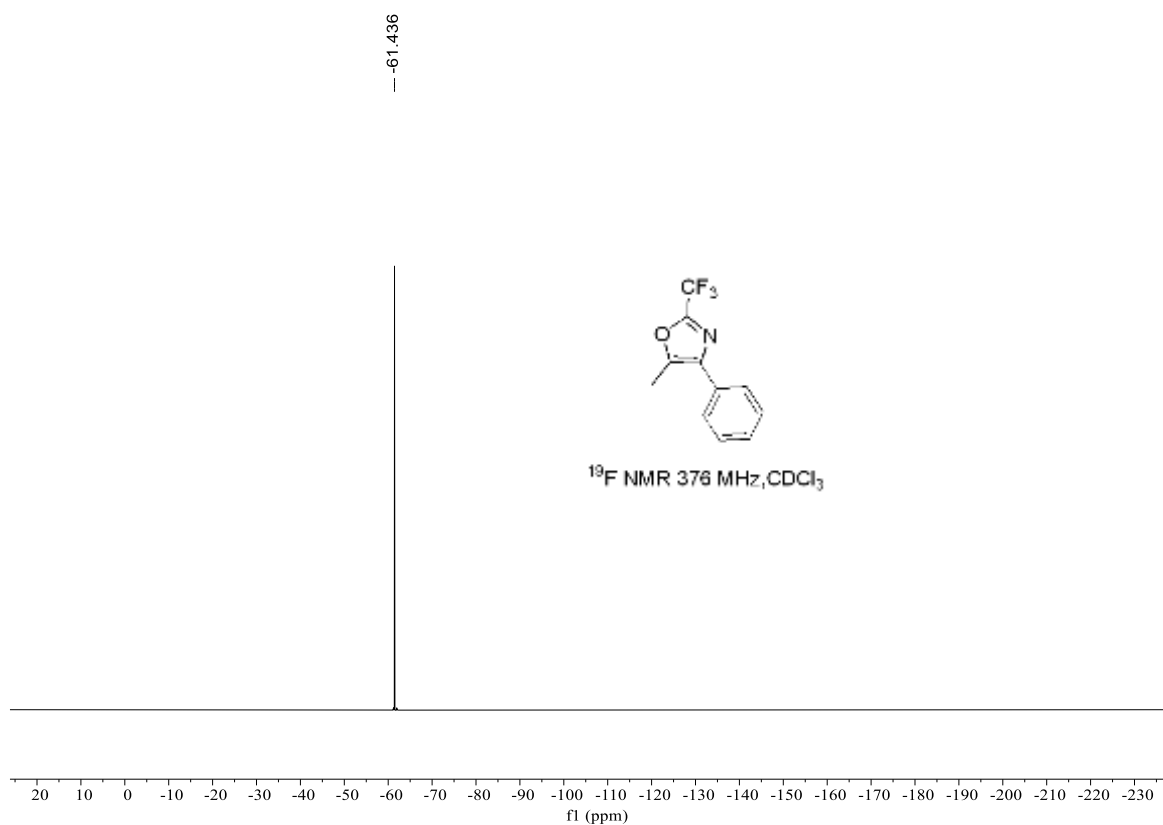

HRMS(ESI) copy of compound **5**:

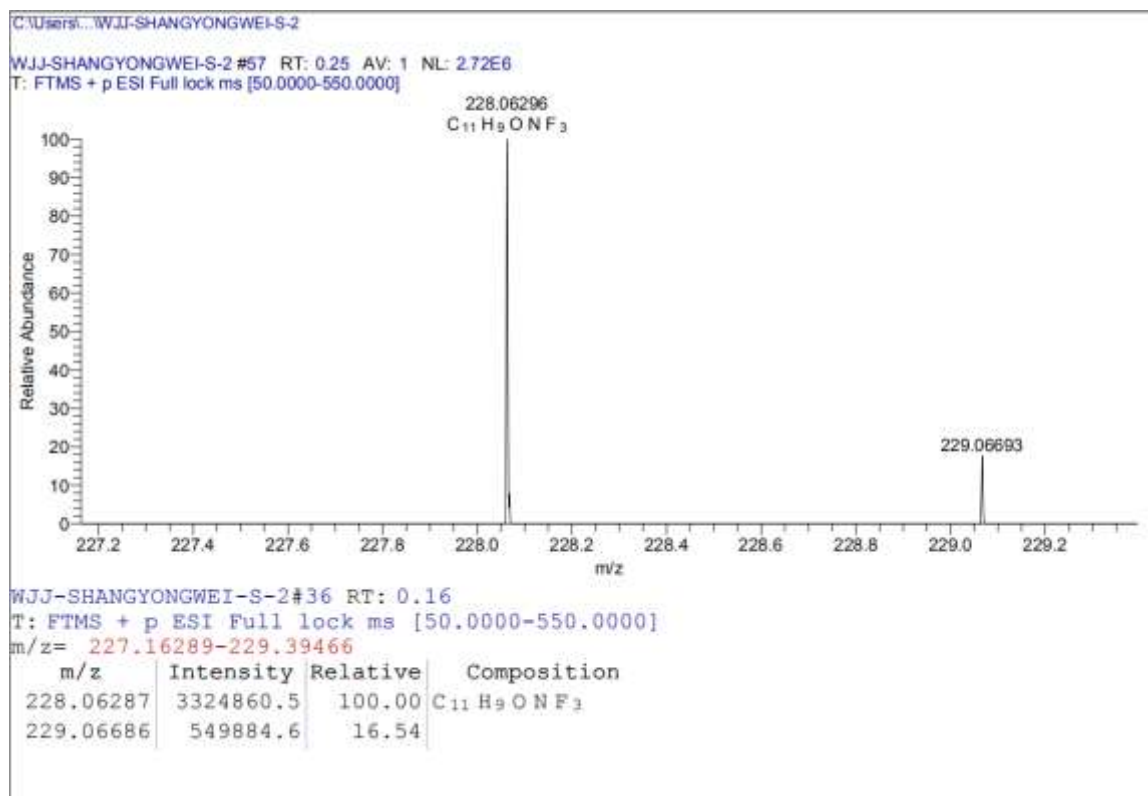

## 6. Control experiments

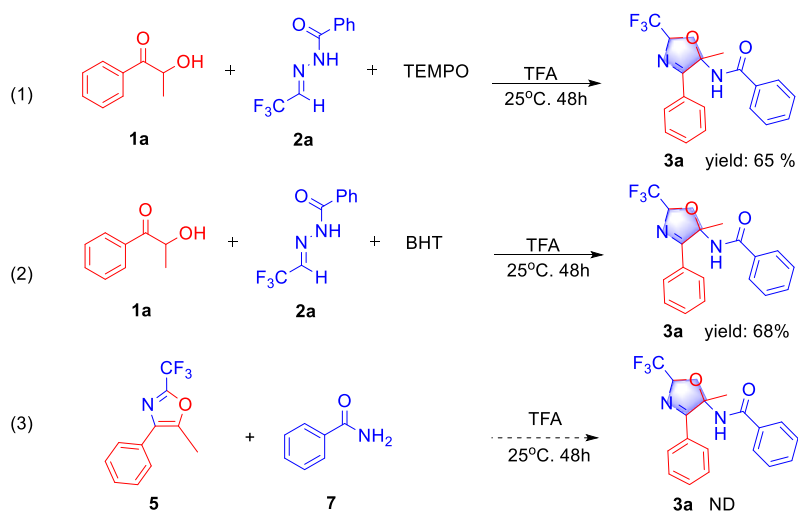

Scheme S5 Control experiments for mechanism exploration

HRMS(ESI) copies of control experiment reaction system

To elucidate the mechanism of the reaction, we carried out two free radical inhibition experiments (Scheme S5). When 1.2 equiv of free radical inhibitor TEMPO (2,2,6,6-tetramethylpiperidine-N-oxyl) and BHT (2,6-di-tert-butyl-4-methylphenol) was added to the reaction mixture containing 1a and 2a under the optimal conditions, the reaction could still work, but neither the molecular weight of Tempo adduct nor the molecular weight of

### Mass Spectrum SmartFormula Report

| Analysis Info |                                          | Acquisition Date |                          |
|---------------|------------------------------------------|------------------|--------------------------|
| Analysis Name | D:\Data\LICP-HY\wangjunjiao 20231020-1.d | 10/20/2023       | 11:20:11 AM              |
| Method        | tune_pos_standard1.m                     | Operator         | BDAL@DE                  |
| Sample Name   | 1                                        | Instrument       | maXis plus 1822843.21257 |
| Comment       |                                          |                  |                          |

| Acquisition Parameter |          |                      |          |                  |           |
|-----------------------|----------|----------------------|----------|------------------|-----------|
| Source Type           | ESI      | Ion Polarity         | Positive | Set Nebulizer    | 0.3 Bar   |
| Focus                 | Active   | Set Capillary        | 3500 V   | Set Dry Heater   | 200 °C    |
| Scan Begin            | 50 m/z   | Set End Plate Offset | -500 V   | Set Dry Gas      | 4.0 l/min |
| Scan End              | 1200 m/z | Set Charging Voltage | 2000 V   | Set Divert Valve | Waste     |
|                       |          | Set Corona           | 0 nA     | Set APCI Heater  | 0 °C      |

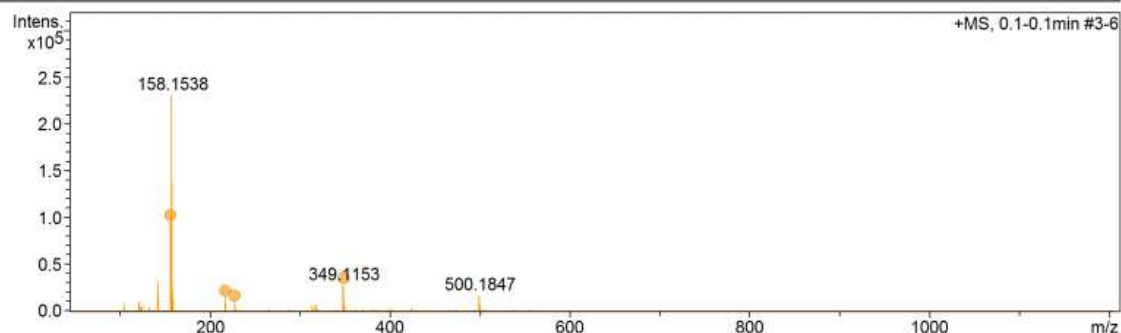

| Meas. m/z | # | Ion Formula  | m/z      | err [ppm] | mSigma | # mSigma | Score  | rdb  | e <sup>-</sup> Conf | N-Rule |
|-----------|---|--------------|----------|-----------|--------|----------|--------|------|---------------------|--------|
| 122.0597  | 1 | C7H8NO       | 122.0600 | 2.6       | 6.3    | 1        | 100.00 | 4.5  | even                | ok     |
| 156.1380  | 1 | C9H18NO      | 156.1383 | 2.1       | 4.2    | 1        | 100.00 | 1.5  | even                | ok     |
| 217.0575  | 1 | C9H8F3N2O    | 217.0583 | 4.0       | 13.1   | 1        | 100.00 | 5.5  | even                | ok     |
| 228.0629  | 1 | C11H9F3NO    | 228.0631 | 0.7       | 10.3   | 1        | 100.00 | 6.5  | even                | ok     |
| 349.1153  | 1 | C18H16F3N2O2 | 349.1158 | 1.4       | 29.3   | 1        | 100.00 | 10.5 | even                | ok     |

BHT adduct was not found in HRMS:

The molecular weight of BHT adduct was not found in HRMS

## Mass Spectrum SmartFormula Report

### Analysis Info

Analysis Name D:\Data\LICP-HYwangjunjiao 20231020-2.d  
 Method tune\_pos\_standard1.m  
 Sample Name 2  
 Comment

Acquisition Date 10/20/2023 11:23:09 AM

Operator BDAL@DE  
 Instrument maXis plus 1822843.21257

### Acquisition Parameter

|             |          |                      |          |                  |           |
|-------------|----------|----------------------|----------|------------------|-----------|
| Source Type | ESI      | Ion Polarity         | Positive | Set Nebulizer    | 0.3 Bar   |
| Focus       | Active   | Set Capillary        | 3500 V   | Set Dry Heater   | 200 °C    |
| Scan Begin  | 50 m/z   | Set End Plate Offset | -500 V   | Set Dry Gas      | 4.0 l/min |
| Scan End    | 1200 m/z | Set Charging Voltage | 2000 V   | Set Divert Valve | Waste     |
|             |          | Set Corona           | 0 nA     | Set APCI Heater  | 0 °C      |

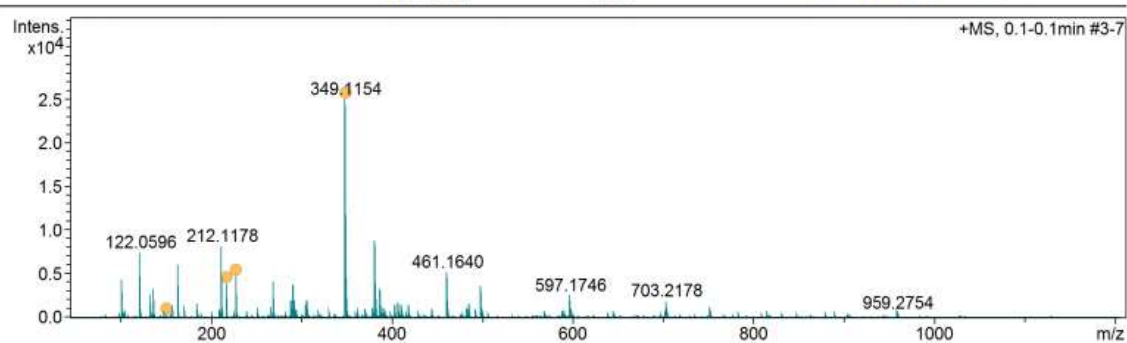

| Meas. m/z | # | Ion Formula  | m/z      | err [ppm] | mSigma | # mSigma | Score  | rdb  | e <sup>-</sup> Conf | N-Rule |
|-----------|---|--------------|----------|-----------|--------|----------|--------|------|---------------------|--------|
| 122.0596  | 1 | C7H8NO       | 122.0600 | 3.3       | 2.9    | 1        | 100.00 | 4.5  | even                | ok     |
| 151.0754  | 1 | C9H11O2      | 151.0754 | -0.1      | n.a.   | 1        | 100.00 | 4.5  | even                | ok     |
| 217.0577  | 1 | C9H8F3N2O    | 217.0583 | 2.9       | 18.2   | 1        | 100.00 | 5.5  | even                | ok     |
| 228.0628  | 1 | C11H9F3NO    | 228.0631 | 1.3       | 8.6    | 1        | 100.00 | 6.5  | even                | ok     |
| 349.1154  | 1 | C18H16F3N2O2 | 349.1158 | 1.3       | 7.1    | 1        | 100.00 | 10.5 | even                | ok     |

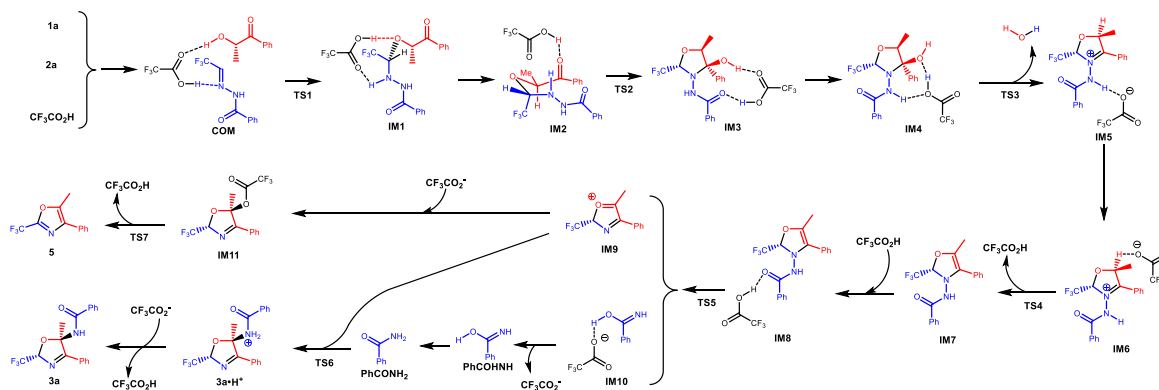

Scheme S6. Proposed Reaction Mechanism.

## 7. Theoretical calculation

The geometry optimizations of all the intermediates, transition states, and products were carried out using M06-2X<sup>[1]</sup>-D3<sup>[2]</sup>/6-31G(d, p)/SMD<sup>[3]</sup> (CF<sub>3</sub>CO<sub>2</sub>H) level of theory, the solvent parameter of CF<sub>3</sub>CO<sub>2</sub>H was set as follows: eps=8.55, epsinf=1.69. The vibrational frequencies were computed at the same level of theory to verify whether each structure's location was at the energy minimum or first-order saddle point on the potential energy surface. The data of Gibbs free energy correction (*GFEC*) were obtained as well. Furthermore, the intrinsic reaction coordination (IRC)<sup>[4,5]</sup> calculations were performed at the same level of theory to ensure that each transition state connected the desired reactant and product. The single-point energies of the optimized structures were computed at M06-2X-D3/Def2-TZVP<sup>[6]</sup>/SMD(CF<sub>3</sub>CO<sub>2</sub>H) level of theory to obtain more accurate molecule energies *E*, and the Gibbs free energy *G* of each optimized structure was calculated as:  $G=E+GFEC$ . All calculations were performed using Gaussian 16 software package<sup>[7]</sup>, and CYLview software was used to display the optimized structures<sup>[8]</sup>. The potential energy surfaces of the reactions leading to **3a** and **5** were displayed in **Scheme S7**, and the reaction mechanism was shown in **Scheme S6**.

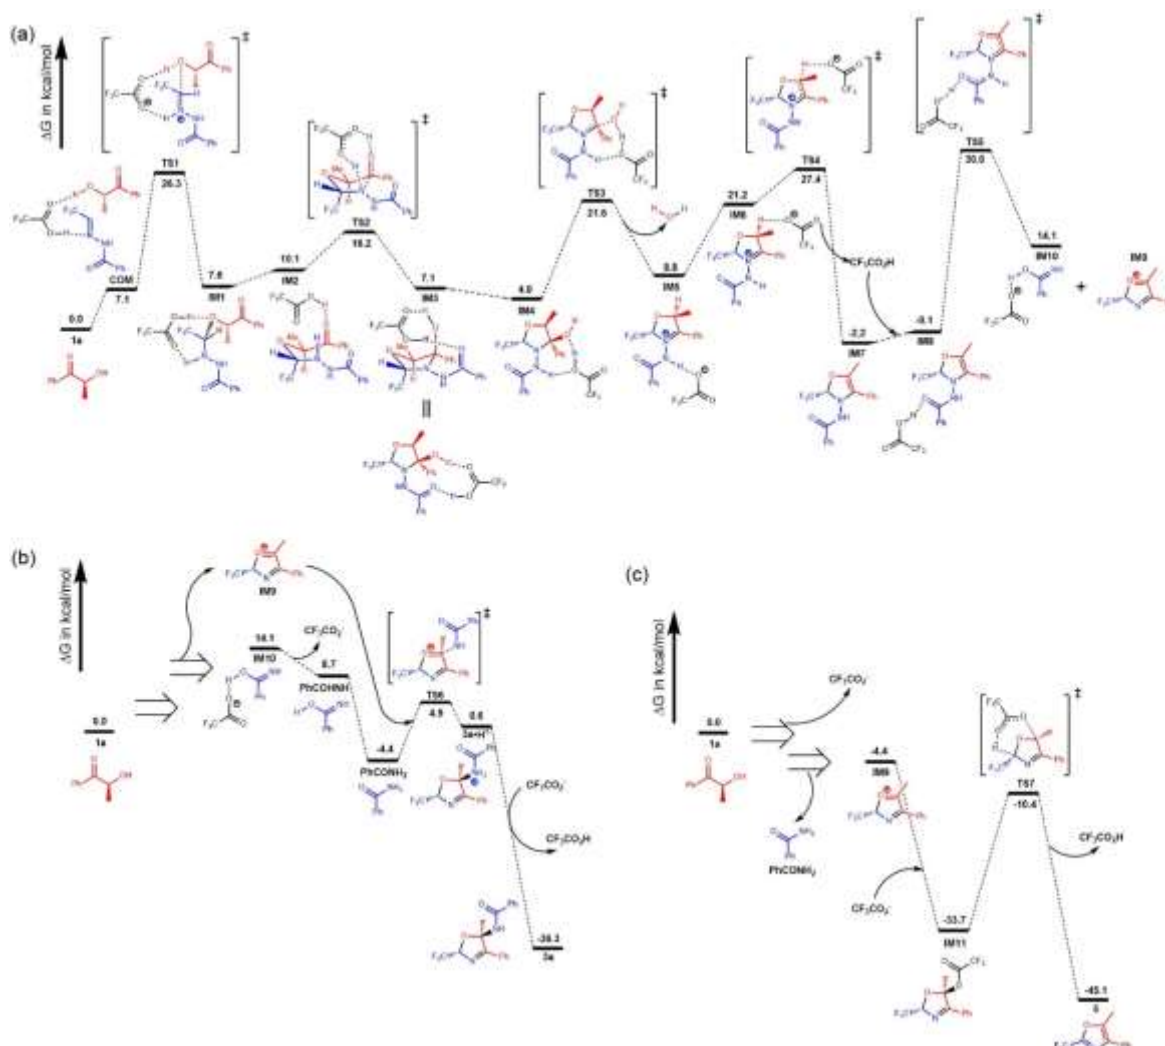

**Scheme S7.** Potential energy surface of the reaction leading to intermediates **IM9** and **IM10** (a), **3a** (b) and **5**(c). The Gibbs free energies of **1a**, **2a** and  $\text{CF}_3\text{CO}_2\text{H}$  were set to 0.0 kcal/mol as references.

We proposed a possible reaction mechanism as follows: **1a**, **2a** and  $\text{CF}_3\text{COOH}$  can generate intermediates **IM9** and **IM10** (Scheme 5(a)), afterwards **IM9** and **IM10** can convert into **3a** and **5** in different reaction pathways (Scheme 5(b) and (c), respectively).

In Scheme 5(a), firstly **1a**, **2a** and  $\text{CF}_3\text{COOH}$  formed hydrogen bond complex (denoted as **COM**), then the C-O bond was formed via **TS1** to form **IM1**, subsequently  $\text{CF}_3\text{COOH}$  formed hydrogen bond with C=O bond of **1a** moiety to form **IM2**, afterwards the C-N bond was formed via **TS2** to generate **IM3**, followed by the formation of **IM4** with different hydrogen bonds. The dehydration reaction occurred with the assistance of  $\text{CF}_3\text{COOH}$  via **TS3** to form ion-pair **IM5**, Afterwards the proton transfer reaction took place via **IM6**→**TS4**→**IM7**→**IM8** pathway, in which C=C double bond was constructed in 5-membered ring moiety. Subsequently the amide moiety was removed via **TS5** to generate

intermediates **IM9** and **IM10**.

In **Scheme 5(b)**, **IM10** released  $\text{CF}_3\text{COO}^-$  anion to produce **PhCOHNH**, which tautomerized to amide **PhCONH<sub>2</sub>**, afterwards the C-N bond formation occurred between **IM9** and **PhCONH<sub>2</sub>** via **TS6** to generate **3a·H<sup>+</sup>**, finally  $\text{CF}_3\text{COO}^-$  anion abstracted the proton to generate **3a**.

In **Scheme 5(c)**, after the formation of **PhCONH<sub>2</sub>**, the proton transfer reaction between  $\text{CF}_3\text{COO}^-$  anion and **IM9** occurred via **IM11→TS7→5** pathway.

It should be noticed that: At first, we supposed the C-O bond formation between  $\text{CF}_3\text{COO}^-$  anion and **IM9** should go through a transition state between **IM9** and **IM11** in **Scheme 5(c)**, however we failed to locate the transition state structure after many trials. Flexible scanning were performed to reveal the relationship between the C-O bond lengths (denoted as *l*) and energies (denoted as *E'*) at M06-2X-D3/6-31G(d, p)/SMD(CF<sub>3</sub>CO<sub>2</sub>H) level of theory, the results were shown in **Table SX1**. It can be seen that *E'* will be lower when *l* is shorter. Therefore, we hypothesized that **IM9** and  $\text{CF}_3\text{COO}^-$  anion could generate **IM11** directly, however the reaction rate is hard to evaluate.

The selectivity between **3a** and **5** could be as follows: The conversion from **IM10** to **3a** only required 9.3 kcal/mol activation free energy barrier (**PhCONH<sub>2</sub>→TS6** procedure, **Scheme 5(b)**); however the conversion from **IM9** to **5** required 23.3 kcal/mol activation free energy barrier (**IM11→TS7** procedure, **Scheme 5(c)**), which is obviously slower.

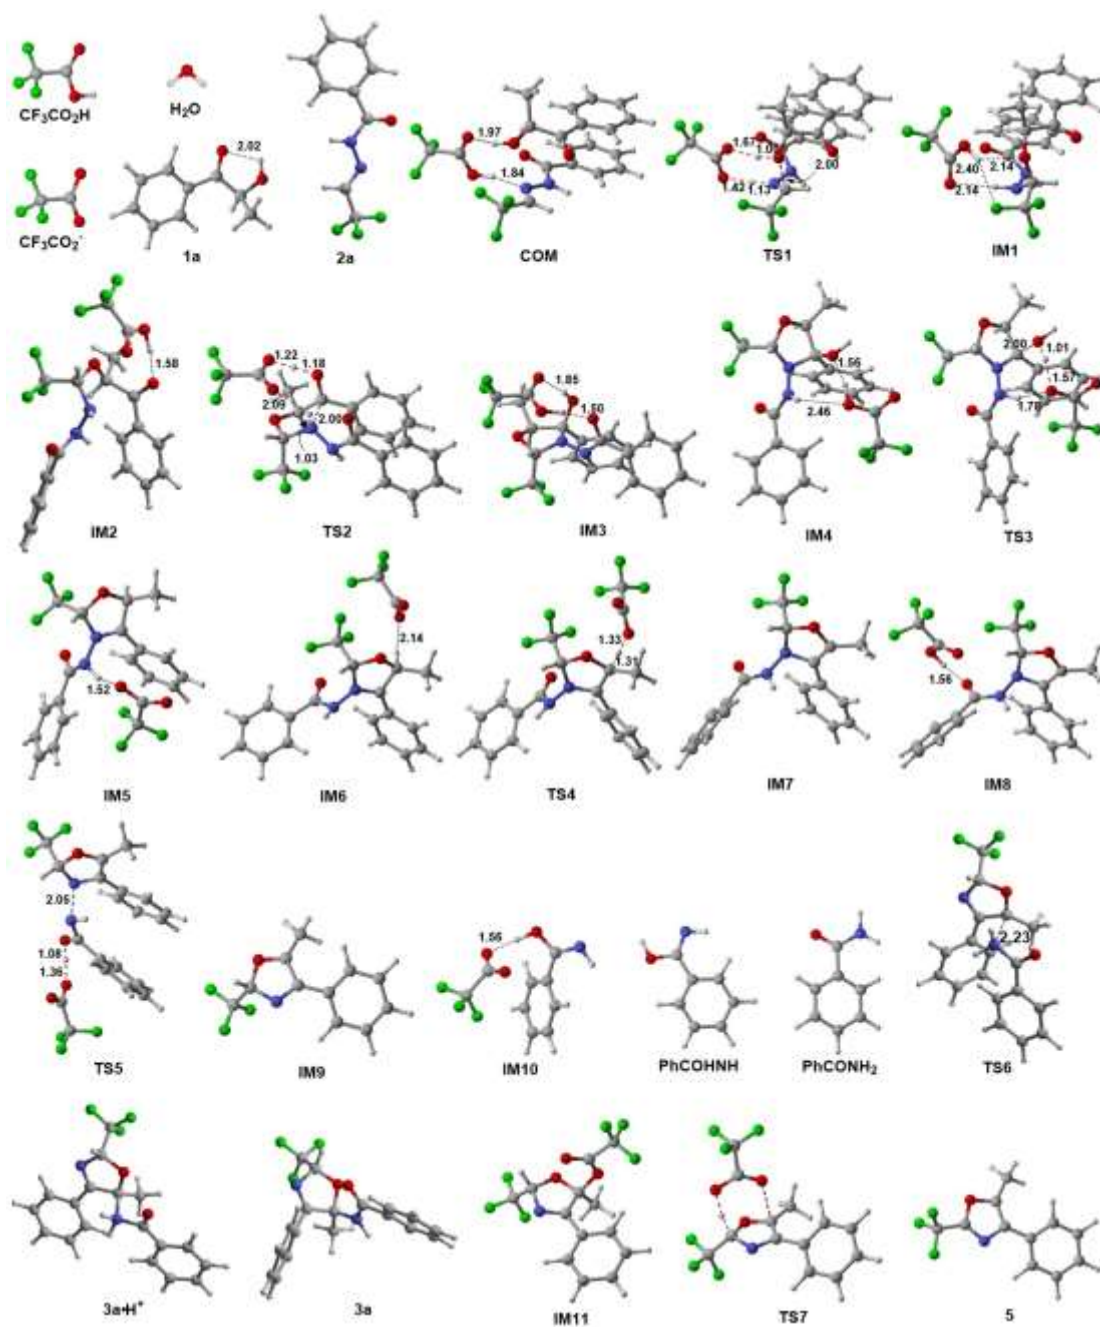

Figure S1. All optimized structures. The distance is measured in Å.

Table SX1. The calculated C-O bond lengths (denoted as  $l$ ) and energies (denoted as  $E'$ ).

| $l/\text{Å}$ | $E'/\text{a.u.}$ | $l/\text{Å}$ | $E'/\text{a.u.}$ |
|--------------|------------------|--------------|------------------|
| <b>1.8</b>   | -1379.792730     | <b>2.4</b>   | -1379.768043     |
| <b>1.9</b>   | -1379.786393     | <b>2.5</b>   | -1379.766177     |
| <b>2.0</b>   | -1379.781097     | <b>2.6</b>   | -1379.764547     |
| <b>2.1</b>   | -1379.776788     | <b>2.7</b>   | -1379.762956     |
| <b>2.2</b>   | -1379.773507     | <b>2.8</b>   | -1379.761338     |

|            |              |            |              |
|------------|--------------|------------|--------------|
| <b>2.3</b> | -1379.771046 | <b>2.9</b> | -1379.759879 |
|------------|--------------|------------|--------------|

**Table S11.** The calculated *GFEC*, *E*, *G* (in a.u.) of all optimized structures, and imaginary frequencies ( $\nu_i$ s, in  $\text{cm}^{-1}$ ) of all optimized transition state structures.

|                                                 | <i>GFEC</i> /a.u. | <i>E</i> /a.u. | <i>G</i> /a.u. | $\nu_i/\text{cm}^{-1}$ |
|-------------------------------------------------|-------------------|----------------|----------------|------------------------|
| <b>1a</b>                                       | 0.137610          | -499.415815    | -499.278205    |                        |
| <b>2a</b>                                       | 0.115015          | -831.442031    | -831.327016    |                        |
| <b>CF<sub>3</sub>CO<sub>2</sub>H</b>            | 0.008752          | -526.855402    | -526.846650    |                        |
| <b>CF<sub>3</sub>CO<sub>2</sub><sup>-</sup></b> | -0.003286         | -526.406535    | -526.409821    |                        |
| <b>H<sub>2</sub>O</b>                           | 0.003847          | -76.436786     | -76.432939     |                        |
| <b>COM</b>                                      | 0.304915          | -1857.745413   | -1857.440498   |                        |
| <b>TS1</b>                                      | 0.308333          | -1857.718348   | -1857.410015   | -268.7                 |
| <b>IM1</b>                                      | 0.315520          | -1857.755238   | -1857.439718   |                        |
| <b>IM2</b>                                      | 0.310275          | -1857.746068   | -1857.435793   |                        |
| <b>TS2</b>                                      | 0.310362          | -1857.736391   | -1857.426029   | -640.4                 |
| <b>IM3</b>                                      | 0.316298          | -1857.756851   | -1857.440553   |                        |
| <b>IM4</b>                                      | 0.313443          | -1857.757527   | -1857.444084   |                        |
| <b>TS3</b>                                      | 0.314350          | -1857.731850   | -1857.417500   | -244.5                 |
| <b>IM5</b>                                      | 0.287226          | -1781.292100   | -1781.004874   |                        |
| <b>IM6</b>                                      | 0.286734          | -1781.271899   | -1780.985165   |                        |
| <b>TS4</b>                                      | 0.281444          | -1781.256658   | -1780.975214   | -1320.9                |
| <b>IM7</b>                                      | 0.254363          | -1254.430120   | -1254.175757   |                        |
| <b>IM8</b>                                      | 0.284268          | -1781.303434   | -1781.019166   |                        |
| <b>TS5</b>                                      | 0.278787          | -1781.249929   | -1780.971142   | -460.2                 |
| <b>IM9</b>                                      | 0.146624          | -853.906803    | -853.760179    |                        |
| <b>IM10</b>                                     | 0.114650          | -927.350962    | -927.236312    |                        |
| <b>PhCOHNH</b>                                  | 0.096833          | -400.931837    | -400.835004    |                        |
| <b>PhCONH<sub>2</sub></b>                       | 0.096940          | -400.952898    | -400.855958    |                        |
| <b>TS6</b>                                      | 0.267876          | -1254.869199   | -1254.601323   | -174.8                 |
| <b>3a·H<sup>+</sup></b>                         | 0.273730          | -1254.881818   | -1254.608088   |                        |
| <b>3a</b>                                       | 0.256735          | -1254.486919   | -1254.230184   |                        |
| <b>IM11</b>                                     | 0.168231          | -1380.384882   | -1380.216651   |                        |
| <b>TS7</b>                                      | 0.157431          | -1380.336998   | -1380.179567   | -961.7                 |
| <b>5</b>                                        | 0.132315          | -853.520504    | -853.388189    |                        |



## 8. HRMS(ESI) copy of active intermediates

We carried out the model reaction under standard condition, and at the sixth hour of the reaction process, we detected a slight amount of **3a** by TLC. Then we took some reaction mixture in situ from the reaction tube and conducted the HRMS test directly.

HRMS(ESI) copy of compound **2a**•H<sup>+</sup>

HRMS(ESI): *m/z* calcd for chemical formula: C<sub>9</sub>H<sub>8</sub>O<sub>2</sub>N<sub>2</sub>F<sub>3</sub> [M + H]<sup>+</sup> 217.0583; found 217.0585.

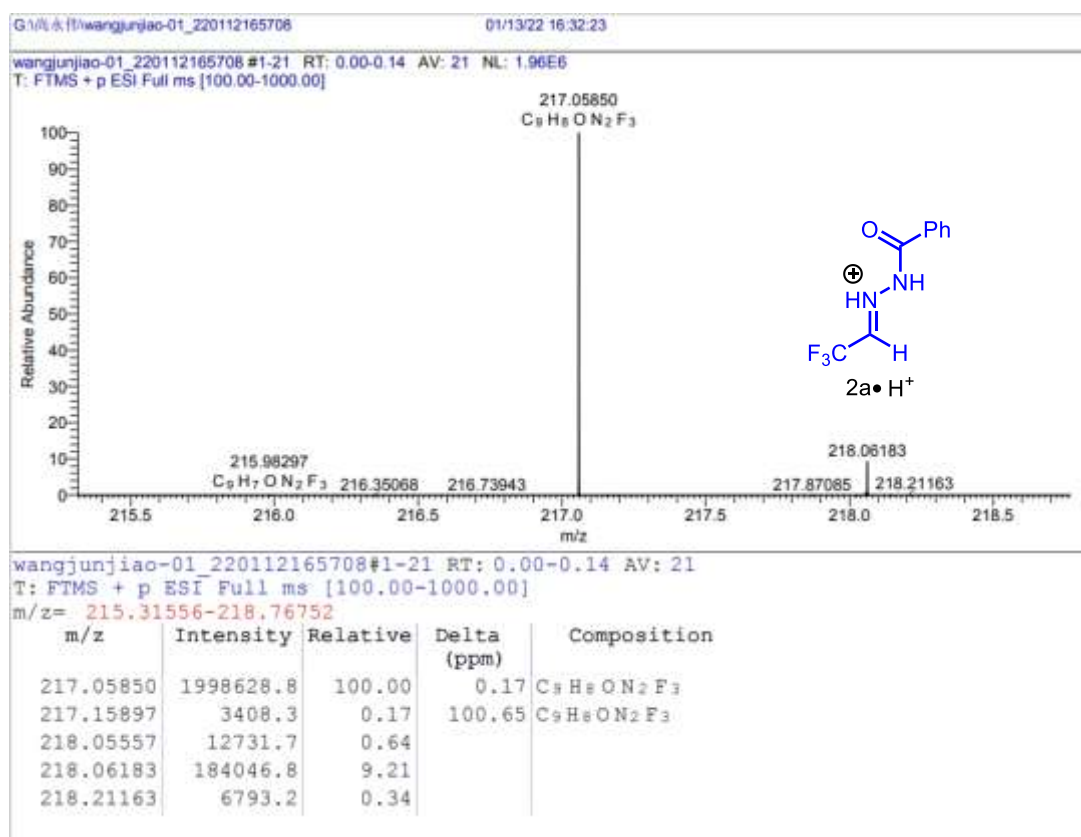

HRMS(ESI) copy of compound **IM1**, **IM2**, **IM3**, **IM5**.

HRMS(ESI): *m/z* calcd for chemical formula: C<sub>18</sub>H<sub>18</sub>F<sub>3</sub>N<sub>2</sub>O<sub>3</sub> [M + H]<sup>+</sup> 368.1342; found 368.1341.

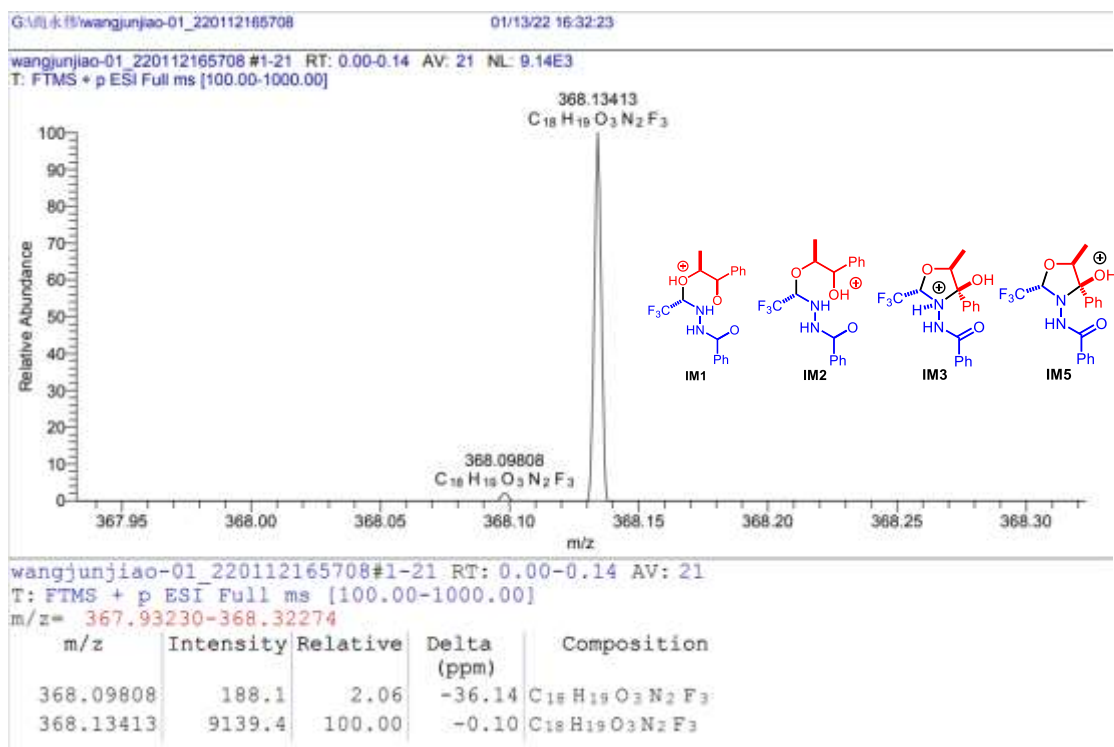

HRMS(ESI) copy of compound **IM4**.

HRMS(ESI):  $m/z$  calcd for chemical formula: C<sub>18</sub>H<sub>18</sub>F<sub>3</sub>N<sub>2</sub>O<sub>3</sub> [M + H]<sup>+</sup> 367.1309; found 367.1264.

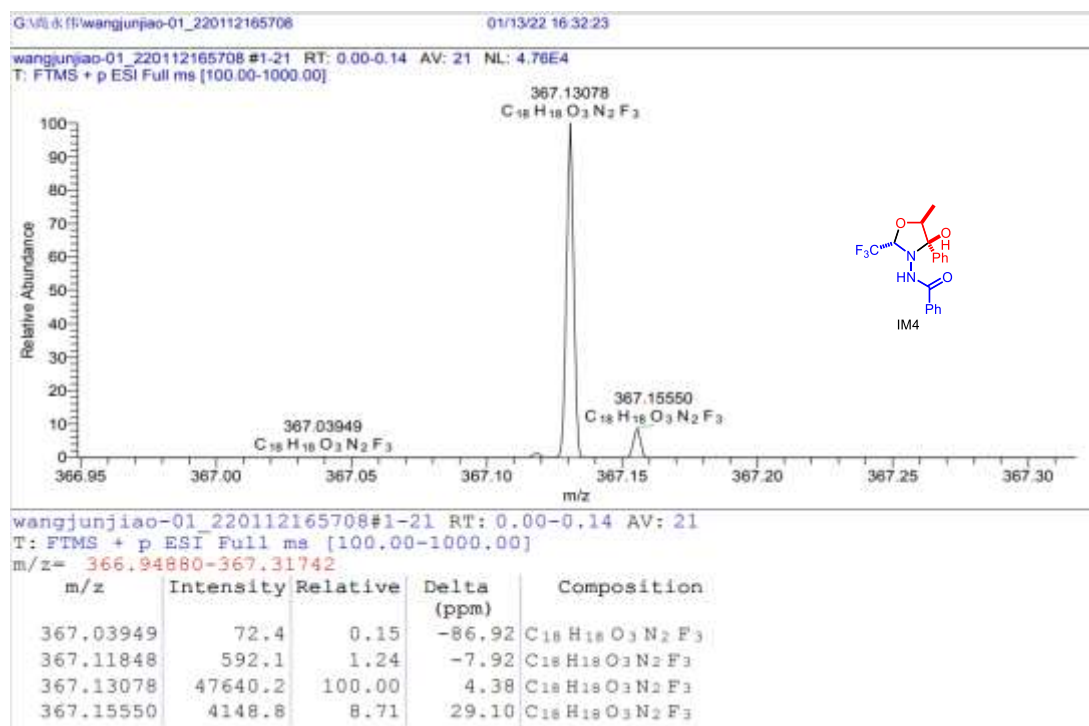

HRMS(ESI) copy of compound **IM6**.

HRMS(ESI):  $m/z$  calcd for chemical formula:  $C_{18}H_{17}F_3N_2O_2 [M + H]^+$  350.1188; found 350.1237.

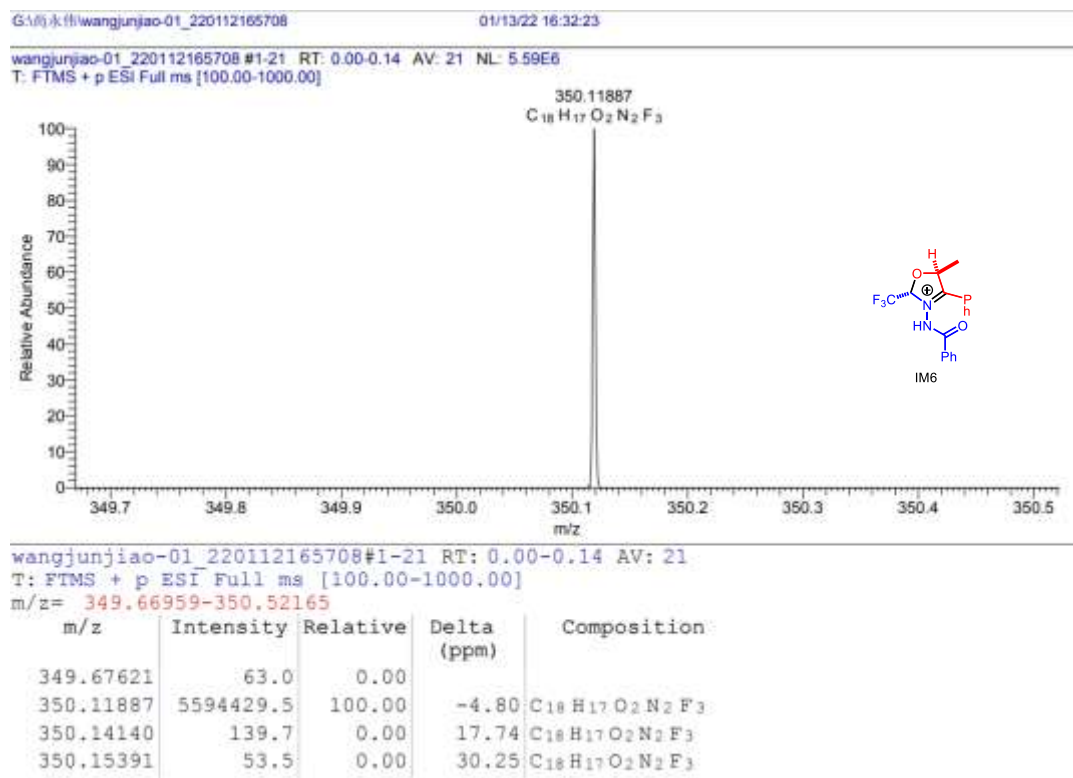

HRMS(ESI) copy of compound **IM7**.

HRMS(ESI):  $m/z$  calcd for chemical formula:  $C_{18}H_{16}F_3N_2O_2 [M + H]^+$  349.1158; found 349.1159.

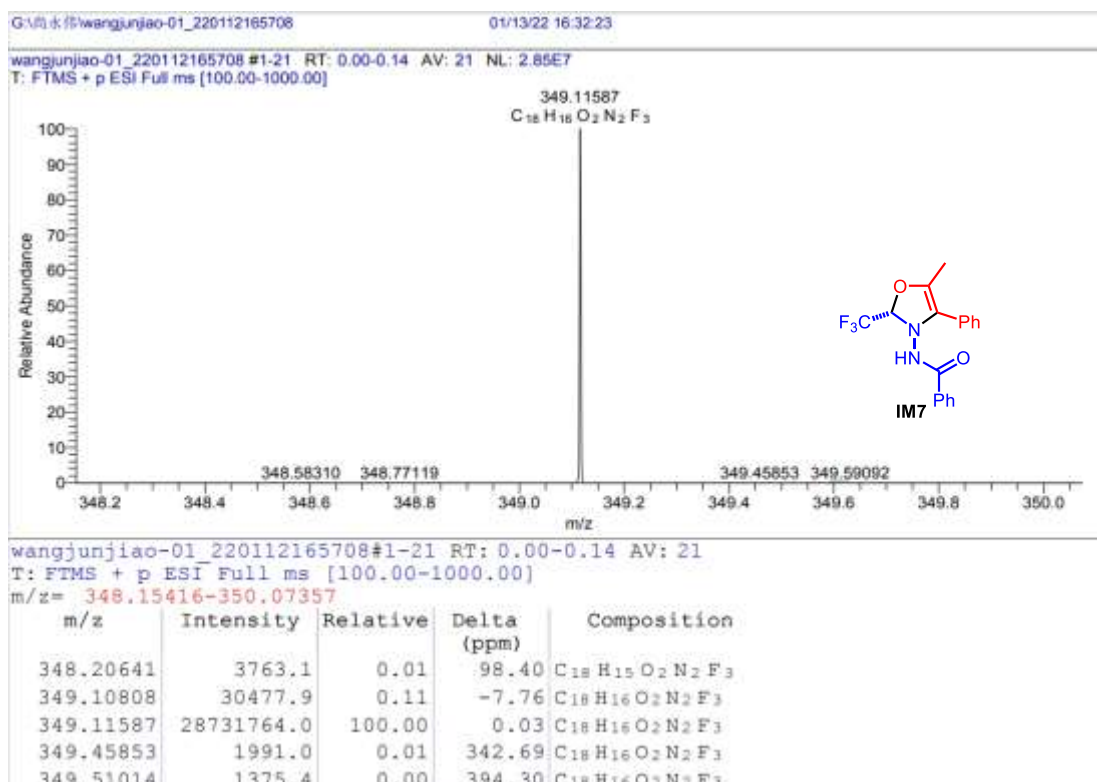

HRMS(ESI) copy of compound **IM9**.

HRMS(ESI):  $m/z$  calcd for chemical formula: C<sub>11</sub>H<sub>10</sub>F<sub>3</sub>NO [M + H]<sup>+</sup> 229.0710; found 229.0665.

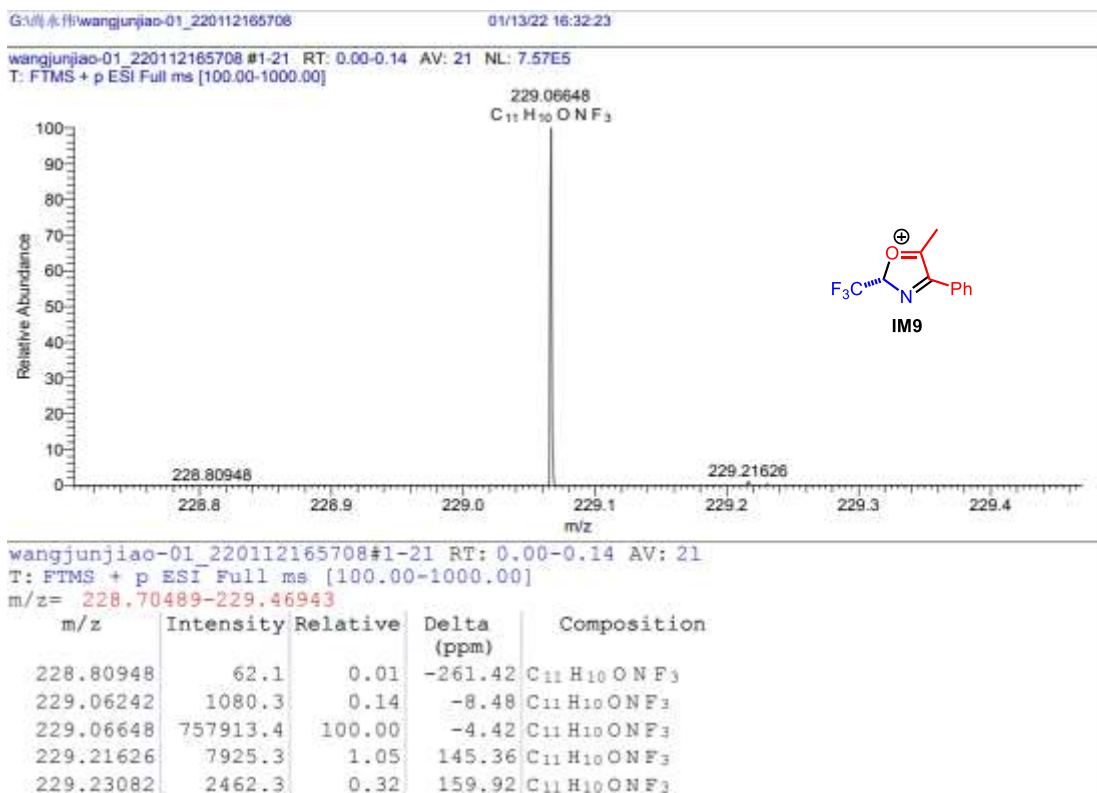

HRMS(ESI) copy of compound  $\text{PhCONH}_2$ .

HRMS(ESI):  $m/z$  calcd for chemical formula:  $\text{C}_7\text{H}_8\text{NO}$   $[\text{M} + \text{H}]^+$  122.0600; found 122.0601.

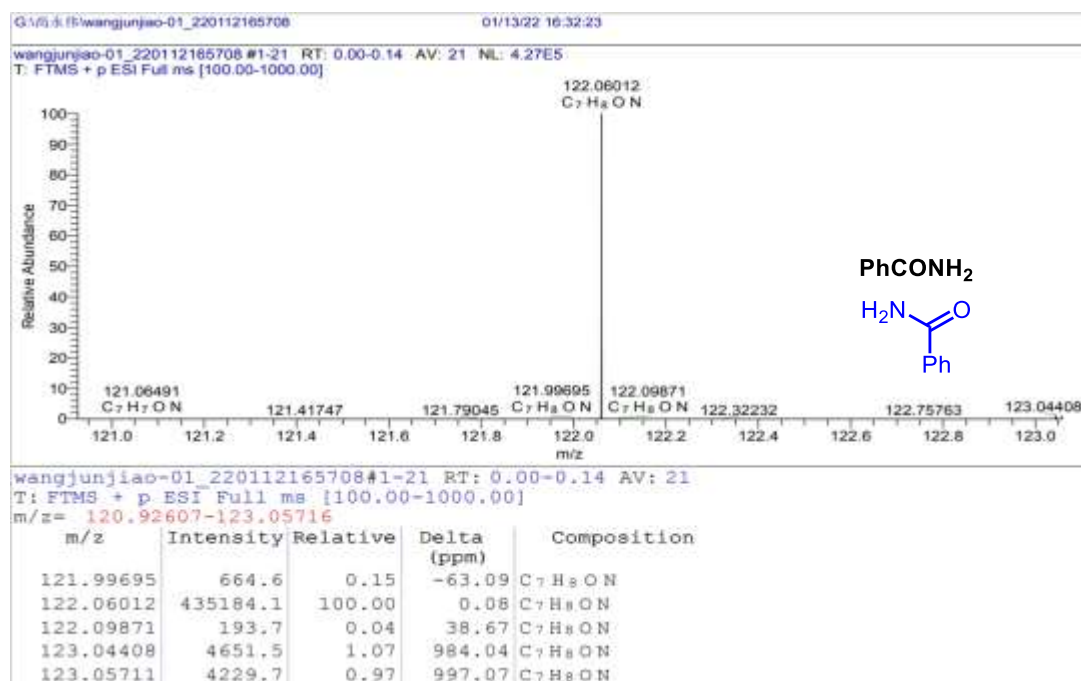

## 9. References and notes

- (1) Zhao, Y.; Truhlar, D. G., The M06 suite of density functionals for main group thermochemistry, thermochemical kinetics, noncovalent interactions, excited states, and transition elements: two new functionals and systematic testing of four M06-class functionals and 12 other functionals. *Theor. Chem. Acc.* **2008**, *120*, 215-241.
- (2) Grimme, S.; Antony, J.; Ehrlich, S.; Krieg, H., A consistent and accurate ab initio parametrization of density functional dispersion correction (DFT-D) for the 94 elements H-Pu. *J. Chem. Phys.* **2010**, *132*, 154104.
- (3) Marenich, A. V.; Cramer, C. J.; Truhlar, D. G., Universal Solvation Model Based on Solute Electron Density and on a Continuum Model of the Solvent Defined by the Bulk Dielectric Constant and Atomic Surface Tensions. *J. Phys. Chem. B.* **2009**, *113*, 6378-6396.
- (4) Fukui, K., The path of chemical reactions - the IRC approach. *Acc. Chem. Res.* **1981**, *14*, 363-368.
- (5) Gonzalez, C.; Schlegel, H. B., An improved algorithm for reaction path following. *J. Chem. Phys.* **1989**, *90*, 2154-2161.
- (6) Weigend, F.; Ahlrichs, R., Balanced basis sets of split valences, triple zeta valence and quadruple zeta valence quality for H to Rn: Design and assessment of accuracy. *Phys. Chem. Chem. Phys.* **2005**, *7*, 3297-3305.
- (7) M. J. Frisch, G. W. Trucks, H. B. Schlegel, G. E. Scuseria, M. A. Robb, J. R. Cheeseman, G. Scalmani, V. Barone, G. A. Petersson, H. Nakatsuji, X. Li, M. Caricato, A. V. Marenich, J. Bloino, B. G. Janesko, R. Gomperts, B. Mennucci, H. P. Hratchian, J. V. Ortiz, A. F.

Izmaylov, J. L. Sonnenberg, D. Williams-Young, F. Ding, F. Lipparini, F. Egidi, J. Goings, B. Peng, A. Petrone, T. Henderson, D. Ranasinghe, V. G. Zakrzewski, J. Gao, N. Rega, G. Zheng, W. Liang, M. Hada, M. Ehara, K. Toyota, R. Fukuda, J. Hasegawa, M. Ishida, T. Nakajima, Y. Honda, O. Kitao, H. Nakai, T. Vreven, K. Throssell, J. A. Montgomery, Jr., J. E. Peralta, F. Ogliaro, M. J. Bearpark, J. J. Heyd, E. N. Brothers, K. N. Kudin, V. N. Staroverov, T. A. Keith, R. Kobayashi, J. Normand, K. Raghavachari, A. P. Rendell, J. C. Burant, S. S. Iyengar, J. Tomasi, M. Cossi, J. M. Millam, M. Klene, C. Adamo, R. Cammi, J. W. Ochterski, R. L. Martin, K. Morokuma, O. Farkas, J. B. Foresman, and D. J. Fox, Gaussian 16, Revision A.03, Gaussian, Inc., Wallingford CT, **2016**.

(8) C. Y. Legault, Universite de Sherbrooke, CYLview, version 1.0b, **2009** (<http://www.cylview.org/>).

## 10. Cartesian coordinates

### 1a

|   |             |             |             |
|---|-------------|-------------|-------------|
| C | 0.95269500  | 0.58434800  | -0.14003200 |
| O | 1.32245600  | 1.74515600  | -0.03433300 |
| C | -0.48993300 | 0.22472300  | -0.09677800 |
| C | -0.94463400 | -1.06528900 | -0.39288300 |
| C | -1.40985100 | 1.22395700  | 0.24208800  |
| C | -2.30570300 | -1.34970500 | -0.34646500 |
| H | -0.24717800 | -1.84977300 | -0.66751300 |
| C | -2.76715200 | 0.93586500  | 0.29105500  |
| H | -1.04335900 | 2.21994200  | 0.46699200  |
| C | -3.21550800 | -0.35200500 | -0.00315900 |
| H | -2.65557800 | -2.34958000 | -0.57949900 |
| H | -3.47675600 | 1.71173700  | 0.55783300  |
| H | -4.27640800 | -0.57761200 | 0.03405300  |
| C | 2.01879200  | -0.50165900 | -0.25412400 |
| H | 1.75519400  | -1.19064600 | -1.06369600 |
| C | 2.10931600  | -1.26014000 | 1.07277100  |
| H | 1.17900800  | -1.78054800 | 1.31186900  |
| H | 2.91661800  | -1.99237100 | 1.00710700  |
| H | 2.33745800  | -0.55858600 | 1.88050300  |
| O | 3.25708600  | 0.09317000  | -0.57660100 |
| H | 3.18652800  | 1.02025600  | -0.29501200 |

### 2a

|   |             |             |             |
|---|-------------|-------------|-------------|
| C | 0.91969800  | 0.75843500  | 0.20946500  |
| O | 0.70862100  | 1.92834300  | 0.48245600  |
| N | -0.09977700 | -0.13932800 | -0.02245300 |
| H | 0.10112000  | -1.06728600 | -0.38670700 |
| C | 2.29587500  | 0.19526000  | 0.07906800  |
| C | 3.31448100  | 1.08373200  | -0.27497500 |
| C | 2.59392700  | -1.14856500 | 0.32454800  |
| C | 4.61987300  | 0.62691000  | -0.40841600 |
| H | 3.06751600  | 2.12579400  | -0.44813100 |
| C | 3.90487500  | -1.59882400 | 0.20021800  |
| H | 1.82156400  | -1.84143100 | 0.64534300  |
| C | 4.91533000  | -0.71501900 | -0.17215500 |
| H | 5.40711200  | 1.31629500  | -0.69419400 |
| H | 4.13756800  | -2.63886300 | 0.40202600  |

|   |             |             |             |
|---|-------------|-------------|-------------|
| H | 5.93557600  | -1.07091000 | -0.27179400 |
| C | -2.27842100 | -0.58677800 | -0.20907900 |
| H | -2.08972300 | -1.60058800 | -0.56566800 |
| N | -1.38231700 | 0.26293400  | 0.09963500  |
| C | -3.71477500 | -0.18592500 | -0.07680800 |
| F | -3.86848200 | 1.06912000  | 0.33833800  |
| F | -4.35005400 | -0.98880700 | 0.79215900  |
| F | -4.34815500 | -0.31257600 | -1.25405100 |

**CF<sub>3</sub>CO<sub>2</sub>H**

|   |             |             |             |
|---|-------------|-------------|-------------|
| C | -0.93508600 | 0.15383800  | -0.00024200 |
| O | -1.47870000 | 1.22512900  | -0.00009600 |
| O | -1.50864900 | -1.03806500 | -0.00002400 |
| H | -2.47669300 | -0.92957000 | 0.00029900  |
| C | 0.59348800  | -0.00193400 | -0.00004900 |
| F | 1.17716400  | 1.18889700  | -0.00229500 |
| F | 0.99064300  | -0.67866200 | -1.07914800 |
| F | 0.99053500  | -0.67449900 | 1.08171100  |

**CF<sub>3</sub>CO<sub>2</sub><sup>-</sup>**

|   |             |             |             |
|---|-------------|-------------|-------------|
| C | -1.02769800 | 0.00964500  | 0.00000400  |
| O | -1.57344200 | 1.12782700  | 0.00003400  |
| O | -1.51412600 | -1.13900700 | -0.00017200 |
| C | 0.52416800  | 0.01427600  | -0.00000400 |
| F | 1.05465100  | 1.24455600  | -0.00010600 |
| F | 1.01290900  | -0.62531400 | -1.07928700 |
| F | 1.01263100  | -0.62525100 | 1.07951600  |

**H<sub>2</sub>O**

|   |            |             |             |
|---|------------|-------------|-------------|
| O | 0.00000000 | 0.00000000  | 0.11925000  |
| H | 0.00000000 | 0.75760800  | -0.47700000 |
| H | 0.00000000 | -0.75760800 | -0.47700000 |

**COM**

|   |             |             |             |
|---|-------------|-------------|-------------|
| C | 1.03006500  | 0.91144700  | -1.01609600 |
| O | 0.23065800  | 1.63857600  | -0.44174500 |
| N | 0.64067400  | -0.31580500 | -1.49906000 |
| H | 1.29797500  | -0.97310800 | -1.90706700 |
| C | 2.45527500  | 1.29318800  | -1.23393500 |
| C | 2.80913000  | 2.59778500  | -0.87527700 |
| C | 3.43073300  | 0.41766900  | -1.72039900 |
| C | 4.12362500  | 3.02565100  | -1.00420300 |
| H | 2.04231300  | 3.26103700  | -0.49052200 |
| C | 4.74754100  | 0.85025600  | -1.84512100 |
| H | 3.20050500  | -0.60970300 | -1.98554500 |
| C | 5.09554400  | 2.15052400  | -1.48779200 |
| H | 4.39165500  | 4.03918500  | -0.72565200 |
| H | 5.50299600  | 0.16466900  | -2.21389400 |
| H | 6.12447500  | 2.48141400  | -1.58473500 |
| C | -0.95491200 | -1.88307000 | -1.66556200 |
| H | -0.25196400 | -2.62454100 | -2.04551800 |
| N | -0.65129100 | -0.69009300 | -1.35407700 |
| C | -2.38661700 | -2.31406100 | -1.54112700 |
| F | -3.13336500 | -1.43152600 | -0.86900600 |
| F | -2.47395800 | -3.49381400 | -0.92539100 |

|   |             |             |             |
|---|-------------|-------------|-------------|
| F | -2.93484900 | -2.46020800 | -2.75721400 |
| C | 0.96130600  | -1.86898300 | 1.11631300  |
| O | 0.89593100  | -2.90007800 | 0.46585500  |
| C | 2.27699400  | -1.18464900 | 1.32088100  |
| C | 2.38063100  | 0.13044600  | 1.78904700  |
| C | 3.43951200  | -1.88836300 | 0.98124300  |
| C | 3.63134200  | 0.73124700  | 1.91065800  |
| H | 1.49240100  | 0.70601500  | 2.03127400  |
| C | 4.68552000  | -1.29049600 | 1.11269700  |
| H | 3.34703600  | -2.90670500 | 0.61827700  |
| C | 4.78214900  | 0.02372600  | 1.57410400  |
| H | 3.70303200  | 1.75709100  | 2.25646800  |
| H | 5.58238000  | -1.84280100 | 0.85166000  |
| H | 5.75485200  | 0.49654100  | 1.66624000  |
| C | -0.29018100 | -1.25571400 | 1.72922000  |
| H | -0.35725000 | -0.21744100 | 1.36789500  |
| C | -0.22257200 | -1.26663700 | 3.25908700  |
| H | 0.63114100  | -0.71007200 | 3.64924500  |
| H | -1.14013700 | -0.81945400 | 3.64962000  |
| H | -0.16080600 | -2.30003800 | 3.61059000  |
| O | -1.40690400 | -1.99725700 | 1.29035600  |
| H | -2.15018000 | -1.37498700 | 1.28540200  |
| H | -1.81810300 | 0.63941100  | -0.85851600 |
| C | -3.11060900 | 1.22055300  | 0.42009000  |
| O | -2.84020200 | 0.46593000  | 1.32577500  |
| O | -2.56848900 | 1.29103200  | -0.76481300 |
| C | -4.21454200 | 2.27965300  | 0.56871400  |
| F | -3.69630300 | 3.50504700  | 0.46226100  |
| F | -4.81011600 | 2.17085300  | 1.74962000  |
| F | -5.13202600 | 2.13277100  | -0.38937600 |

### TS1

|   |             |             |             |
|---|-------------|-------------|-------------|
| C | 0.77480100  | 0.89596000  | -0.98145600 |
| O | 0.06766500  | 1.53043800  | -0.21044300 |
| N | 0.32016900  | -0.24733900 | -1.59486900 |
| H | 0.74266400  | -0.55402500 | -2.46557800 |
| C | 2.19035000  | 1.25717500  | -1.27287400 |
| C | 2.58798900  | 2.56630700  | -0.99247000 |
| C | 3.12374300  | 0.31761200  | -1.71987900 |
| C | 3.91383800  | 2.94012900  | -1.17582300 |
| H | 1.85170100  | 3.27554700  | -0.62943300 |
| C | 4.45101200  | 0.69581300  | -1.89433600 |
| H | 2.83555500  | -0.71583000 | -1.88887300 |
| C | 4.84564100  | 2.00484300  | -1.62478100 |
| H | 4.22234000  | 3.95832600  | -0.96434600 |
| H | 5.17942100  | -0.03672300 | -2.22571700 |
| H | 5.88263800  | 2.29513300  | -1.75898000 |
| C | -1.29149200 | -1.80964000 | -1.10417300 |
| H | -0.51594400 | -2.56994600 | -1.12883800 |
| N | -1.02107200 | -0.58733700 | -1.45099900 |
| C | -2.70591900 | -2.31550500 | -1.32040200 |
| F | -3.62127800 | -1.45594100 | -0.87721000 |
| F | -2.88759000 | -3.48289600 | -0.71520900 |
| F | -2.89217400 | -2.48988300 | -2.63135700 |
| C | 0.92350500  | -2.02890800 | 1.08036400  |



|   |             |             |             |
|---|-------------|-------------|-------------|
| O | 0.83132500  | -3.14109700 | 0.58418600  |
| C | 2.24685500  | -1.37133100 | 1.27280500  |
| C | 2.37637300  | -0.05046000 | 1.72055700  |
| C | 3.39338100  | -2.10453000 | 0.93810200  |
| C | 3.63860500  | 0.52835800  | 1.82259000  |
| H | 1.50419800  | 0.54605900  | 1.96876900  |
| C | 4.64970300  | -1.52538100 | 1.04486600  |
| H | 3.27924000  | -3.12654000 | 0.59261200  |
| C | 4.77237200  | -0.20517600 | 1.48355900  |
| H | 3.73227900  | 1.55689400  | 2.15435200  |
| H | 5.53432000  | -2.09633600 | 0.78308600  |
| H | 5.75402300  | 0.25210800  | 1.55672700  |
| C | -0.32925700 | -1.28679000 | 1.51864600  |
| H | -0.27435300 | -0.23749700 | 1.20917200  |
| C | -0.50527700 | -1.37349200 | 3.03235400  |
| H | 0.34055900  | -0.91572300 | 3.54971600  |
| H | -1.41763200 | -0.84275500 | 3.31430400  |
| H | -0.58651300 | -2.42018100 | 3.33455700  |
| O | -1.46894100 | -1.88330100 | 0.88535000  |
| H | -2.16339600 | -1.16854700 | 0.97848900  |
| H | -1.78793800 | 0.23039200  | -1.34469300 |
| C | -2.91387500 | 1.27038600  | 0.24278700  |
| O | -2.77489900 | 0.38300800  | 1.09944500  |
| O | -2.73009100 | 1.23244600  | -1.00227700 |
| C | -3.32655800 | 2.66424000  | 0.75600000  |
| F | -2.26109500 | 3.47921000  | 0.73788100  |
| F | -3.79320800 | 2.62923900  | 2.00474500  |
| F | -4.26710300 | 3.21168900  | -0.02140300 |

## IM1

|   |             |             |             |
|---|-------------|-------------|-------------|
| C | 0.63708200  | 0.50666600  | -1.20007200 |
| O | 0.00147900  | 1.37775900  | -0.60549000 |
| N | 0.04673800  | -0.65327000 | -1.60332500 |
| H | 0.46788200  | -1.15304500 | -2.37838000 |
| C | 2.09302600  | 0.65266400  | -1.48766800 |
| C | 2.63447400  | 1.93665600  | -1.39687300 |
| C | 2.92103000  | -0.44255100 | -1.74906800 |
| C | 3.99896900  | 2.12776400  | -1.58035900 |
| H | 1.97590500  | 2.77001000  | -1.17514700 |
| C | 4.28665300  | -0.24668000 | -1.92626200 |
| H | 2.51753200  | -1.45077000 | -1.76944500 |
| C | 4.82555800  | 1.03617700  | -1.84306300 |
| H | 4.41897100  | 3.12572200  | -1.51315100 |
| H | 4.93217600  | -1.09861000 | -2.11257500 |
| H | 5.89227000  | 1.18427600  | -1.97703500 |
| C | -1.82289400 | -1.79623400 | -0.65751500 |
| H | -1.24202500 | -2.70436500 | -0.83587600 |
| N | -1.34830300 | -0.77389400 | -1.54828000 |
| C | -3.27484100 | -2.07035700 | -1.02447300 |
| F | -4.00820500 | -0.94855600 | -0.88412800 |
| F | -3.80976900 | -3.00269800 | -0.23497000 |
| F | -3.39520900 | -2.48059900 | -2.28614100 |
| C | 0.46106500  | -2.02713400 | 1.15820800  |
| O | 0.24692100  | -3.19348000 | 0.86679900  |
| C | 1.84966000  | -1.51341300 | 1.34287500  |

|   |             |             |             |
|---|-------------|-------------|-------------|
| C | 2.13211600  | -0.17200000 | 1.63232000  |
| C | 2.90407600  | -2.42191000 | 1.18066400  |
| C | 3.45422100  | 0.25126100  | 1.74292500  |
| H | 1.33840100  | 0.55966100  | 1.75191900  |
| C | 4.22007600  | -1.99661100 | 1.29372500  |
| H | 2.67150300  | -3.45835000 | 0.95993300  |
| C | 4.49601800  | -0.65602800 | 1.56990100  |
| H | 3.66757500  | 1.29417100  | 1.95182200  |
| H | 5.03211900  | -2.70405100 | 1.16252600  |
| H | 5.52489600  | -0.31914800 | 1.64784200  |
| C | -0.70758200 | -1.07593700 | 1.38744000  |
| H | -0.46312900 | -0.06894800 | 1.04324200  |
| C | -1.02570600 | -1.05295300 | 2.87797700  |
| H | -0.16608700 | -0.69066500 | 3.44632300  |
| H | -1.87273200 | -0.38921800 | 3.06102600  |
| H | -1.27639600 | -2.06204900 | 3.21433000  |
| O | -1.89452200 | -1.51033300 | 0.72777600  |
| H | -3.00115700 | 0.31985900  | 0.88085700  |
| H | -1.76936400 | 0.14104300  | -1.38365200 |
| C | -2.47312000 | 2.01952600  | 0.21495900  |
| O | -2.62834300 | 1.16478600  | 1.20600900  |
| O | -2.88201800 | 1.91021300  | -0.91253000 |
| C | -1.72069400 | 3.26811400  | 0.70127800  |
| F | -0.74733200 | 2.95212700  | 1.55426600  |
| F | -2.57434100 | 4.08184500  | 1.33437200  |
| F | -1.20077000 | 3.92465200  | -0.32732500 |

## IM2

|   |             |             |             |
|---|-------------|-------------|-------------|
| C | -2.15464800 | -1.42120300 | -0.99330100 |
| O | -1.76610300 | -2.17341300 | -1.87799000 |
| N | -1.31668600 | -0.52744500 | -0.37844700 |
| H | -1.73903000 | 0.32755700  | -0.02782800 |
| C | -3.56259700 | -1.38026900 | -0.50305100 |
| C | -4.57155600 | -1.82831400 | -1.35684400 |
| C | -3.87782900 | -0.91893000 | 0.77878700  |
| C | -5.89704000 | -1.79301700 | -0.93883400 |
| H | -4.30518200 | -2.19342700 | -2.34325100 |
| C | -5.20504900 | -0.89057000 | 1.19436900  |
| H | -3.08678600 | -0.61724500 | 1.45981300  |
| C | -6.21381300 | -1.32137400 | 0.33444100  |
| H | -6.68328100 | -2.13335500 | -1.60423300 |
| H | -5.45112100 | -0.54219400 | 2.19182500  |
| H | -7.24852300 | -1.29702300 | 0.66041500  |
| C | 1.03485500  | -0.94857900 | -0.04815400 |
| H | 1.77517800  | -1.38879000 | -0.71876800 |
| N | -0.01405700 | -0.37406900 | -0.85688500 |
| C | 0.60187100  | -2.06863400 | 0.89883400  |
| F | -0.13578100 | -1.63732600 | 1.93476900  |
| F | 1.68963000  | -2.65501600 | 1.41419500  |
| F | -0.10234900 | -3.00439800 | 0.25579300  |
| C | 0.63048500  | 2.10526600  | 0.21584500  |
| O | 1.53180700  | 2.53411600  | -0.49969000 |
| C | -0.74612100 | 2.64439600  | 0.07900600  |
| C | -1.70452000 | 2.50412800  | 1.09292100  |
| C | -1.09009600 | 3.27967100  | -1.12054800 |

|   |             |             |             |
|---|-------------|-------------|-------------|
| C | -2.99666500 | 2.98372200  | 0.89712400  |
| H | -1.45026900 | 2.03689000  | 2.03935600  |
| C | -2.38274200 | 3.74808900  | -1.31326000 |
| H | -0.33947700 | 3.37857100  | -1.89749200 |
| C | -3.33680400 | 3.59749600  | -0.30645100 |
| H | -3.73588800 | 2.87600800  | 1.68357100  |
| H | -2.65096000 | 4.22539900  | -2.24954000 |
| H | -4.34816500 | 3.95882300  | -0.46091900 |
| C | 0.93064900  | 1.04603300  | 1.28077600  |
| H | -0.00075200 | 0.62532900  | 1.66580800  |
| C | 1.72531800  | 1.67801200  | 2.41206500  |
| H | 1.16836500  | 2.50947200  | 2.85133100  |
| H | 1.91561700  | 0.92854500  | 3.18224400  |
| H | 2.67841000  | 2.05047300  | 2.02930000  |
| O | 1.73152400  | 0.01145000  | 0.72258300  |
| H | 3.02365700  | 2.02480200  | -0.39457600 |
| H | 0.03357300  | -0.71441300 | -1.81502700 |
| C | 3.87876000  | 0.44410600  | -0.94838900 |
| O | 3.90211200  | 1.54360700  | -0.24182900 |
| O | 3.16077900  | 0.18180800  | -1.88580600 |
| C | 4.85767900  | -0.61759800 | -0.42565500 |
| F | 5.82387000  | -0.10131100 | 0.32869700  |
| F | 5.41477300  | -1.27742300 | -1.43948100 |
| F | 4.17186400  | -1.50007700 | 0.31481100  |

## TS2

|   |             |             |             |
|---|-------------|-------------|-------------|
| C | 1.74055800  | 0.05763100  | -1.48700700 |
| O | 1.17578200  | -0.74155100 | -2.21897100 |
| N | 1.01169400  | 0.83862800  | -0.60254600 |
| H | 1.51520200  | 1.11753500  | 0.23617700  |
| C | 3.21430000  | 0.25067900  | -1.44391900 |
| C | 4.00016800  | -0.75167400 | -2.01767500 |
| C | 3.81760900  | 1.33123500  | -0.79264800 |
| C | 5.38499700  | -0.68386500 | -1.92579900 |
| H | 3.51188500  | -1.58504500 | -2.51186100 |
| C | 5.20427600  | 1.39568600  | -0.70683500 |
| H | 3.22033700  | 2.13517800  | -0.37203500 |
| C | 5.98659600  | 0.38667500  | -1.26577600 |
| H | 5.99470400  | -1.46698200 | -2.36343300 |
| H | 5.67367300  | 2.23560700  | -0.20636500 |
| H | 7.06789300  | 0.43790900  | -1.19073100 |
| C | -1.31360300 | 1.25502000  | 0.08475800  |
| H | -2.00305700 | 1.43252600  | -0.74353500 |
| N | -0.25108000 | 0.31372100  | -0.29710700 |
| C | -0.78019500 | 2.62055700  | 0.52525300  |
| F | 0.22639300  | 2.52659500  | 1.41754900  |
| F | -1.76199500 | 3.31046800  | 1.09969800  |
| F | -0.32832800 | 3.31851900  | -0.51616000 |
| C | -0.34299200 | -1.05721100 | 1.14956100  |
| O | -0.94752600 | -2.05119900 | 0.60866000  |
| C | 1.11817700  | -1.25470800 | 1.40020400  |
| C | 1.87691000  | -0.39898900 | 2.20844800  |
| C | 1.76116800  | -2.28926000 | 0.70760400  |
| C | 3.25570600  | -0.57274600 | 2.31200800  |
| H | 1.41423600  | 0.41435600  | 2.75713100  |

|   |             |             |             |
|---|-------------|-------------|-------------|
| C | 3.13629800  | -2.45840800 | 0.81459300  |
| H | 1.17427600  | -2.94177800 | 0.07127400  |
| C | 3.88846700  | -1.59594000 | 1.61117600  |
| H | 3.83366700  | 0.09911300  | 2.93753900  |
| H | 3.62446900  | -3.25508800 | 0.26311900  |
| H | 4.96463700  | -1.71762900 | 1.67991700  |
| C | -1.17151400 | -0.08905100 | 2.00124900  |
| H | -0.51775100 | 0.61720800  | 2.51584700  |
| C | -2.03538800 | -0.81987900 | 3.00703700  |
| H | -1.39966400 | -1.40839800 | 3.67301300  |
| H | -2.59306100 | -0.09494700 | 3.60215100  |
| H | -2.73813600 | -1.48414100 | 2.50185600  |
| O | -2.03547000 | 0.63570600  | 1.11093600  |
| H | -2.10276100 | -1.96151700 | 0.36780300  |
| H | -0.56714100 | -0.25707600 | -1.09563100 |
| C | -3.39005900 | -1.07653300 | -0.92449100 |
| O | -3.27919900 | -1.85095400 | 0.08250900  |
| O | -2.51616800 | -0.69274600 | -1.69765700 |
| C | -4.79955700 | -0.49241700 | -1.11991900 |
| F | -5.75150700 | -1.23184500 | -0.55210700 |
| F | -5.09240300 | -0.35442300 | -2.41399800 |
| F | -4.83533700 | 0.72867200  | -0.56113800 |

### IM3

|   |             |             |             |
|---|-------------|-------------|-------------|
| C | -1.44576000 | -1.56223500 | -0.10995100 |
| O | -0.67086900 | -2.31142300 | -0.72397000 |
| N | -1.06167400 | -0.37173800 | 0.40672100  |
| H | -1.76742800 | 0.26778800  | 0.76199200  |
| C | -2.87003200 | -1.93514600 | 0.09853100  |
| C | -3.44698200 | -2.81775900 | -0.81803600 |
| C | -3.62123000 | -1.44190300 | 1.17073700  |
| C | -4.77914400 | -3.18735000 | -0.67696800 |
| H | -2.84653700 | -3.19859200 | -1.63714800 |
| C | -4.95067800 | -1.82502200 | 1.31175600  |
| H | -3.17110000 | -0.79199300 | 1.91591600  |
| C | -5.53098000 | -2.69048500 | 0.38645300  |
| H | -5.23019700 | -3.86421800 | -1.39446800 |
| H | -5.53096000 | -1.45298700 | 2.14904300  |
| H | -6.56963500 | -2.98377300 | 0.49857400  |
| C | 1.17067600  | 0.26603500  | 1.15476600  |
| H | 1.47154400  | -0.70610700 | 1.55680600  |
| N | 0.17856400  | 0.12826000  | 0.11223100  |
| C | 0.72164400  | 1.10838300  | 2.35080900  |
| F | 0.25820400  | 2.31525800  | 1.99517700  |
| F | 1.73204300  | 1.29237000  | 3.20269800  |
| F | -0.26770100 | 0.48259500  | 3.00758000  |
| C | 0.31884300  | 1.18367000  | -0.91673500 |
| O | 0.33324400  | 0.58444400  | -2.18615700 |
| C | -0.86478900 | 2.15562000  | -0.95186500 |
| C | -0.85353600 | 3.44318300  | -0.41024300 |
| C | -2.04692600 | 1.69809600  | -1.55411300 |
| C | -1.99198500 | 4.24683600  | -0.46558200 |
| H | 0.03169300  | 3.85311100  | 0.05907800  |
| C | -3.18559000 | 2.49447700  | -1.59595600 |
| H | -2.06634800 | 0.71012800  | -2.00204700 |

|   |             |             |             |
|---|-------------|-------------|-------------|
| C | -3.16205900 | 3.77628300  | -1.05044900 |
| H | -1.95563300 | 5.24698400  | -0.04639900 |
| H | -4.08863400 | 2.11408900  | -2.06213100 |
| H | -4.04680700 | 4.40356600  | -1.08614000 |
| C | 1.68940000  | 1.79031400  | -0.48364600 |
| H | 1.53510700  | 2.73271600  | 0.04148900  |
| C | 2.67908500  | 1.99095200  | -1.60324000 |
| H | 2.27023000  | 2.70912600  | -2.31837200 |
| H | 3.60958700  | 2.39348500  | -1.19693700 |
| H | 2.88990900  | 1.05492600  | -2.12046900 |
| O | 2.23991300  | 0.85356200  | 0.47842400  |
| H | 0.94704900  | -0.17145700 | -2.16352500 |
| H | 0.80487600  | -2.30995900 | -0.45524200 |
| C | 2.60409000  | -1.71786700 | -0.86136100 |
| O | 2.40658300  | -1.29174400 | -1.98094300 |
| O | 1.77204800  | -2.35407100 | -0.09399400 |
| C | 3.98984700  | -1.56946500 | -0.21171100 |
| F | 4.64187000  | -0.53994200 | -0.74150700 |
| F | 4.70994100  | -2.67671000 | -0.42042500 |
| F | 3.89279400  | -1.38338500 | 1.10550500  |

#### IM4

|   |             |             |             |
|---|-------------|-------------|-------------|
| C | -0.47352400 | 1.87908800  | 0.54543400  |
| O | -1.32888700 | 2.11292400  | 1.38666700  |
| N | -0.61066600 | 0.89738100  | -0.40255800 |
| H | 0.03832600  | 0.83222800  | -1.18155700 |
| C | 0.80415200  | 2.65035800  | 0.46725300  |
| C | 0.78586200  | 3.99284900  | 0.85128700  |
| C | 2.00279600  | 2.04703800  | 0.08053100  |
| C | 1.95979400  | 4.73647600  | 0.81782300  |
| H | -0.15037100 | 4.44043600  | 1.16872200  |
| C | 3.17877800  | 2.79131800  | 0.06219200  |
| H | 2.02331800  | 0.99266600  | -0.16933000 |
| C | 3.15575400  | 4.13674400  | 0.42211100  |
| H | 1.94514100  | 5.78262900  | 1.10469200  |
| H | 4.10999600  | 2.31461800  | -0.22589300 |
| H | 4.07186400  | 4.71823700  | 0.40384300  |
| C | -2.75424000 | 0.23991100  | -1.33848300 |
| H | -2.39103400 | 0.55674600  | -2.32507200 |
| N | -1.69428900 | 0.05483400  | -0.35592800 |
| C | -3.74528900 | 1.27654900  | -0.82688100 |
| F | -4.20672300 | 0.95497100  | 0.38520900  |
| F | -4.79371300 | 1.36712100  | -1.65433900 |
| F | -3.17621600 | 2.48574900  | -0.75483700 |
| C | -1.45659700 | -1.35758900 | -0.21238200 |
| O | -0.66087300 | -1.79620400 | -1.32693700 |
| C | -0.81661400 | -1.69679900 | 1.11596900  |
| C | -1.27243800 | -1.05370100 | 2.27081200  |
| C | 0.19087700  | -2.65624000 | 1.20902400  |
| C | -0.71885800 | -1.36919000 | 3.50650600  |
| H | -2.04209500 | -0.29228400 | 2.18609200  |
| C | 0.74426300  | -2.96766500 | 2.45021200  |
| H | 0.56325600  | -3.15608000 | 0.32057200  |
| C | 0.29113000  | -2.32651400 | 3.59883700  |
| H | -1.07123900 | -0.86056300 | 4.39771500  |

|   |             |             |             |
|---|-------------|-------------|-------------|
| H | 1.53385000  | -3.70932000 | 2.51254800  |
| H | 0.72581700  | -2.56671500 | 4.56361900  |
| C | -2.90083000 | -1.85458000 | -0.38050300 |
| H | -3.43567100 | -1.64485600 | 0.55298500  |
| C | -3.06368100 | -3.29896700 | -0.78164800 |
| H | -2.60029800 | -3.94623000 | -0.03158400 |
| H | -4.12449500 | -3.54785400 | -0.84261200 |
| H | -2.61452600 | -3.48734200 | -1.76049500 |
| O | -3.39865900 | -1.00466800 | -1.42872700 |
| H | -0.71160100 | -2.76071400 | -1.41822800 |
| H | 0.84509700  | -1.37918000 | -1.35771800 |
| C | 2.73630500  | -1.75675100 | -1.13425200 |
| O | 2.68590600  | -2.95618600 | -1.01132300 |
| O | 1.75276400  | -0.92754400 | -1.36935300 |
| C | 4.06075800  | -0.98852100 | -0.98068400 |
| F | 5.09831900  | -1.80289500 | -1.12385100 |
| F | 4.11738800  | -0.43805700 | 0.23899000  |
| F | 4.15727400  | -0.00259900 | -1.87455700 |

### TS3

|   |             |             |             |
|---|-------------|-------------|-------------|
| C | -0.01471800 | 1.81680400  | 0.40150000  |
| O | -0.73810800 | 2.12490100  | 1.33527500  |
| N | -0.39921500 | 0.87152900  | -0.53192300 |
| H | 0.29683600  | 0.32573200  | -1.06383700 |
| C | 1.31405800  | 2.44855200  | 0.15895900  |
| C | 1.78575400  | 3.31962000  | 1.14479600  |
| C | 2.08849300  | 2.19536500  | -0.97761000 |
| C | 3.02459700  | 3.93103300  | 0.99938100  |
| H | 1.17228900  | 3.50459200  | 2.01970800  |
| C | 3.33132100  | 2.80383400  | -1.11463000 |
| H | 1.74569200  | 1.52495000  | -1.75947100 |
| C | 3.79916500  | 3.67171400  | -0.13029100 |
| H | 3.38801800  | 4.60567200  | 1.76708800  |
| H | 3.93388900  | 2.59694900  | -1.99251000 |
| H | 4.76912200  | 4.14510000  | -0.24317300 |
| C | -2.83426700 | 0.59042600  | -0.92079500 |
| H | -2.69071200 | 0.82362400  | -1.98071400 |
| N | -1.56907900 | 0.17503200  | -0.29829900 |
| C | -3.43447800 | 1.80270800  | -0.21410300 |
| F | -3.56047700 | 1.58551400  | 1.09583200  |
| F | -4.65041600 | 2.04016800  | -0.71443900 |
| F | -2.69027000 | 2.89355700  | -0.40658900 |
| C | -1.62082900 | -1.09837200 | 0.06683300  |
| O | -1.34428900 | -1.93211300 | -1.73141500 |
| C | -0.56816900 | -1.68095300 | 0.93288500  |
| C | -0.24824900 | -0.95660900 | 2.08847800  |
| C | 0.04960900  | -2.90529900 | 0.67686400  |
| C | 0.71156100  | -1.44951900 | 2.96451600  |
| H | -0.75071500 | -0.01671800 | 2.29340100  |
| C | 1.02701300  | -3.37637500 | 1.54810700  |
| H | -0.18755000 | -3.47177300 | -0.21369600 |
| C | 1.36063300  | -2.65059800 | 2.68843300  |
| H | 0.95973700  | -0.88451800 | 3.85640700  |
| H | 1.53209000  | -4.30950300 | 1.32354100  |
| H | 2.12551400  | -3.02154700 | 3.36252200  |

|   |             |             |             |
|---|-------------|-------------|-------------|
| C | -3.09135800 | -1.42771600 | 0.17750700  |
| H | -3.35752900 | -1.15257200 | 1.20960400  |
| C | -3.53557600 | -2.83926600 | -0.11214700 |
| H | -2.93880900 | -3.53978900 | 0.47803400  |
| H | -4.58187500 | -2.95074700 | 0.17595100  |
| H | -3.43783000 | -3.06671600 | -1.17351800 |
| O | -3.68467400 | -0.50800800 | -0.74772400 |
| H | -1.39442600 | -2.89513100 | -1.81942800 |
| H | -0.40289900 | -1.66277000 | -1.98692400 |
| C | 1.85924300  | -1.85739500 | -1.56213000 |
| O | 1.92794200  | -3.05788300 | -1.80419800 |
| O | 1.02149400  | -1.00457500 | -2.00156400 |
| C | 2.89745900  | -1.24627600 | -0.59637900 |
| F | 3.64601100  | -2.17442700 | -0.00055100 |
| F | 2.28329400  | -0.53738700 | 0.36563900  |
| F | 3.71971400  | -0.40846900 | -1.24716700 |

### IM5

|   |             |             |             |
|---|-------------|-------------|-------------|
| C | -0.14428900 | 1.71611300  | 0.41610700  |
| O | -0.90186400 | 1.93904000  | 1.34867700  |
| N | -0.44113900 | 0.76934300  | -0.54655200 |
| H | 0.27695700  | 0.17802400  | -1.08970800 |
| C | 1.13584100  | 2.44396600  | 0.20191200  |
| C | 1.51149900  | 3.37159600  | 1.17674400  |
| C | 1.95617900  | 2.21991300  | -0.90816300 |
| C | 2.70468400  | 4.07126100  | 1.04507900  |
| H | 0.86140800  | 3.53087300  | 2.03020700  |
| C | 3.15369000  | 2.91539100  | -1.02951000 |
| H | 1.68337800  | 1.50014700  | -1.67395900 |
| C | 3.52683800  | 3.84152300  | -0.05715100 |
| H | 2.99595600  | 4.79113600  | 1.80232600  |
| H | 3.79533200  | 2.73121400  | -1.88443800 |
| H | 4.46169800  | 4.38338400  | -0.15758900 |
| C | -2.85270700 | 0.36345500  | -1.01273500 |
| H | -2.66611600 | 0.65149200  | -2.05044000 |
| N | -1.57972000 | 0.01735600  | -0.34856700 |
| C | -3.56067400 | 1.50099800  | -0.27460400 |
| F | -3.69973400 | 1.20976700  | 1.02032600  |
| F | -4.77441800 | 1.66471200  | -0.80034300 |
| F | -2.89223400 | 2.64662700  | -0.39645600 |
| C | -1.64242800 | -1.12942900 | 0.24485300  |
| C | -0.54198100 | -1.71995200 | 1.00590000  |
| C | -0.07742900 | -1.06771400 | 2.15365900  |
| C | 0.04347900  | -2.91047900 | 0.56061200  |
| C | 0.97556800  | -1.62815400 | 2.86625500  |
| H | -0.54864300 | -0.14755300 | 2.48220400  |
| C | 1.12628500  | -3.43104800 | 1.25997500  |
| H | -0.30150500 | -3.38937100 | -0.34962700 |
| C | 1.58284200  | -2.79813200 | 2.41473400  |
| H | 1.33249900  | -1.13890700 | 3.76571100  |
| H | 1.61473800  | -4.32732300 | 0.89411000  |
| H | 2.42154700  | -3.21624100 | 2.96135700  |
| C | -3.01830400 | -1.69662900 | 0.04421900  |
| H | -3.54345100 | -1.62439000 | 1.00678000  |
| C | -3.05847100 | -3.11234900 | -0.49241400 |

|   |             |             |             |
|---|-------------|-------------|-------------|
| H | -2.66636500 | -3.80976800 | 0.24990800  |
| H | -4.09998000 | -3.36701500 | -0.69552200 |
| H | -2.48205800 | -3.18805100 | -1.41668900 |
| O | -3.60670900 | -0.80384100 | -0.91425100 |
| C | 1.71223800  | -1.75489100 | -1.70570900 |
| O | 1.87718600  | -2.90321000 | -2.11495900 |
| O | 0.79407400  | -0.93259800 | -1.99644000 |
| C | 2.77932300  | -1.19758800 | -0.73320100 |
| F | 3.54264400  | -2.15489400 | -0.20335100 |
| F | 2.21321500  | -0.52110200 | 0.28153000  |
| F | 3.59230700  | -0.33919700 | -1.37419200 |

## IM6

|   |             |             |             |
|---|-------------|-------------|-------------|
| C | 2.23798600  | -0.80990200 | -0.21397000 |
| O | 1.45761900  | -0.92894400 | -1.13674900 |
| N | 1.93241000  | 0.01020800  | 0.87800800  |
| H | 2.37154000  | -0.17798800 | 1.77604500  |
| C | 3.56993900  | -1.46051100 | -0.14907300 |
| C | 3.75738400  | -2.59559600 | -0.94249500 |
| C | 4.60973700  | -0.97397200 | 0.64962600  |
| C | 4.97915800  | -3.25613400 | -0.92095900 |
| H | 2.93882900  | -2.95107700 | -1.55937400 |
| C | 5.83259400  | -1.63586700 | 0.65897800  |
| H | 4.48652800  | -0.06844500 | 1.23623900  |
| C | 6.01490100  | -2.77739400 | -0.11962400 |
| H | 5.12451400  | -4.14301000 | -1.52795300 |
| H | 6.64514900  | -1.25658600 | 1.26886400  |
| H | 6.96959500  | -3.29276300 | -0.10586100 |
| C | -0.40019700 | -0.34194300 | 1.71696700  |
| H | 0.00877600  | -0.76701300 | 2.63745900  |
| N | 0.63736100  | 0.45659200  | 1.01124200  |
| C | -0.92658800 | -1.47267500 | 0.82279400  |
| F | -1.26724200 | -1.01808900 | -0.38152000 |
| F | -1.99725000 | -2.01314700 | 1.39522400  |
| F | 0.00088000  | -2.42640200 | 0.67749200  |
| C | 0.16403800  | 1.60526000  | 0.61532300  |
| C | 0.92108100  | 2.62040200  | -0.09978200 |
| C | 1.70557300  | 2.28281600  | -1.21267000 |
| C | 0.86280100  | 3.94793000  | 0.35327700  |
| C | 2.42009000  | 3.27543300  | -1.86879000 |
| H | 1.70587100  | 1.26802600  | -1.59171000 |
| C | 1.61109000  | 4.92237200  | -0.29302700 |
| H | 0.27715300  | 4.20781800  | 1.22637500  |
| C | 2.38152300  | 4.58942500  | -1.40558500 |
| H | 3.00693300  | 3.02105700  | -2.74415900 |
| H | 1.58597200  | 5.94380500  | 0.06918500  |
| H | 2.95014200  | 5.35886600  | -1.91716000 |
| C | -1.29705800 | 1.63668000  | 0.98708800  |
| H | -1.84967800 | 1.35926400  | 0.07092500  |
| C | -1.89922300 | 2.89652000  | 1.56139300  |
| H | -1.90017600 | 3.69212300  | 0.81530200  |
| H | -2.93560100 | 2.65483100  | 1.80433300  |
| H | -1.37605000 | 3.21883800  | 2.46361500  |
| O | -1.38527200 | 0.59230600  | 1.97296900  |
| C | -3.93839700 | 0.08851700  | -0.41682400 |



|   |             |             |             |
|---|-------------|-------------|-------------|
| O | -4.05279700 | 0.32585100  | 0.79963300  |
| O | -3.35821400 | 0.73030700  | -1.31694600 |
| C | -4.56130400 | -1.25335800 | -0.88453600 |
| F | -5.57824000 | -1.65082300 | -0.10708200 |
| F | -3.64026000 | -2.23671400 | -0.85634700 |
| F | -5.02448200 | -1.19032700 | -2.14185500 |

**TS4**

|   |             |             |             |
|---|-------------|-------------|-------------|
| C | 2.20392400  | -0.75103400 | -0.16833500 |
| O | 1.36769600  | -1.05337800 | -1.00069000 |
| N | 1.87324700  | 0.01100600  | 0.93743700  |
| H | 2.49576400  | 0.07693500  | 1.73533600  |
| C | 3.63973700  | -1.13305200 | -0.26282400 |
| C | 3.94766600  | -2.25108800 | -1.04207400 |
| C | 4.65816300  | -0.41280000 | 0.36904900  |
| C | 5.26893800  | -2.66086200 | -1.17175400 |
| H | 3.14421200  | -2.79050500 | -1.53225400 |
| C | 5.97981400  | -0.82309400 | 0.22788900  |
| H | 4.43588800  | 0.48173200  | 0.94302900  |
| C | 6.28446000  | -1.94789300 | -0.53605100 |
| H | 5.50746900  | -3.53433000 | -1.76889600 |
| H | 6.77207900  | -0.25986000 | 0.70887100  |
| H | 7.31653200  | -2.26609300 | -0.64101200 |
| C | -0.32051800 | -0.55098700 | 1.98860800  |
| H | 0.17397800  | -0.89378600 | 2.90385400  |
| N | 0.56608700  | 0.31987400  | 1.19759000  |
| C | -0.76690200 | -1.78584000 | 1.19820700  |
| F | -1.25104400 | -1.47136500 | -0.00361100 |
| F | -1.72139900 | -2.41905800 | 1.88084000  |
| F | 0.25983800  | -2.62949300 | 1.03449700  |
| C | -0.07232400 | 1.44328000  | 0.85392700  |
| C | 0.52687600  | 2.50656800  | 0.04623400  |
| C | 1.14580200  | 2.21543900  | -1.17532000 |
| C | 0.46494700  | 3.82372200  | 0.51723800  |
| C | 1.69854500  | 3.24835400  | -1.92219100 |
| H | 1.15426800  | 1.19775000  | -1.55050800 |
| C | 1.04138700  | 4.84507500  | -0.22888800 |
| H | -0.00571200 | 4.04010300  | 1.47040300  |
| C | 1.65295600  | 4.55833800  | -1.44765600 |
| H | 2.16383300  | 3.02941900  | -2.87693900 |
| H | 1.00784300  | 5.86442600  | 0.13935700  |
| H | 2.09177500  | 5.35978800  | -2.03278300 |
| C | -1.40439600 | 1.36271400  | 1.32727200  |
| H | -2.03536000 | 1.02736700  | 0.23184700  |
| C | -2.23878500 | 2.51570200  | 1.81630000  |
| H | -2.26546400 | 3.30366500  | 1.06129800  |
| H | -3.25692000 | 2.14729900  | 1.96280500  |
| H | -1.86171600 | 2.91910000  | 2.75997300  |
| O | -1.41344300 | 0.26852800  | 2.26300500  |
| C | -3.67488900 | -0.17359400 | -0.30586200 |
| O | -4.01937600 | -0.36592700 | 0.85317600  |
| O | -2.83941000 | 0.67614100  | -0.76703200 |
| C | -4.24397200 | -1.08850800 | -1.40873300 |
| F | -5.24828400 | -1.84505900 | -0.96419100 |
| F | -3.28241800 | -1.90693000 | -1.86135500 |

F -4.69292800 -0.37973000 -2.45256400

**IM7**

C 1.50779200 0.78715200 0.50031000  
O 1.25897900 0.99401200 1.68172700  
N 0.53578600 0.58724400 -0.43659900  
H 0.76623700 0.23673300 -1.36124000  
C 2.90869200 0.74034000 -0.02357700  
C 3.91747600 0.39980300 0.88040900  
C 3.23265800 1.03842200 -1.35031000  
C 5.23941000 0.33480800 0.45610400  
H 3.65073300 0.18366400 1.90943600  
C 4.55864900 0.98043400 -1.76906100  
H 2.46431000 1.34502800 -2.05355100  
C 5.56067300 0.62359100 -0.86941500  
H 6.01950700 0.06090300 1.15843200  
H 4.80920500 1.22135100 -2.79666200  
H 6.59326500 0.57701100 -1.19971300  
C -1.62315000 1.62772100 -0.53905200  
H -1.02801000 2.40013400 -1.03044200  
N -0.79642000 0.53751100 -0.03532800  
C -2.37543100 2.25329000 0.62704700  
F -3.14753300 1.35827300 1.25203300  
F -3.16411000 3.24882500 0.20518700  
F -1.51037600 2.75235700 1.51396000  
C -1.48304600 -0.65827000 -0.45888800  
C -1.00126500 -1.96122200 0.00343900  
C -0.30685600 -2.04744200 1.21868500  
C -1.18980500 -3.12200200 -0.75846600  
C 0.15717300 -3.27641700 1.67430100  
H -0.13628100 -1.14546500 1.79901900  
C -0.73369600 -4.35025700 -0.29048400  
H -1.67106700 -3.05936600 -1.72927200  
C -0.06168600 -4.43275000 0.92728900  
H 0.69079600 -3.33057500 2.61769400  
H -0.88948000 -5.24262100 -0.88805400  
H 0.30055000 -5.39059400 1.28600700  
C -2.52255600 -0.31130600 -1.23045700  
C -3.62974600 -1.07263000 -1.85459700  
H -3.67012100 -2.08592400 -1.45480800  
H -4.57807500 -0.57018500 -1.64695800  
H -3.50395300 -1.12359600 -2.94059500  
O -2.57481900 1.06793000 -1.42748900

**IM8**

C -0.19984700 1.24214800 0.24967100  
O -0.39295500 0.85013100 1.41360100  
N 0.68836900 0.64215100 -0.56160900  
H 0.88571400 1.00004600 -1.49286800  
C -0.94465400 2.39944500 -0.31432000  
C -1.35164700 3.39935400 0.57243300  
C -1.28669000 2.47456300 -1.66766600  
C -2.07091800 4.49063100 0.09999000  
H -1.09281800 3.31339100 1.62257100  
C -2.01446800 3.56509500 -2.13263600

|   |             |             |             |
|---|-------------|-------------|-------------|
| H | -1.02275200 | 1.67185000  | -2.34971300 |
| C | -2.39997800 | 4.57424200  | -1.25222900 |
| H | -2.37831500 | 5.27317400  | 0.78523300  |
| H | -2.29069300 | 3.62091900  | -3.18000200 |
| H | -2.96726000 | 5.42337400  | -1.61920300 |
| C | 0.69480600  | -1.73973300 | -0.80681100 |
| H | -0.18511500 | -1.49540100 | -1.40556400 |
| N | 1.26749200  | -0.55890900 | -0.16322300 |
| C | 0.29708800  | -2.74758600 | 0.26369900  |
| F | 1.34667500  | -3.10331700 | 1.01212900  |
| F | -0.20267600 | -3.85541700 | -0.29440600 |
| F | -0.63448700 | -2.23280200 | 1.07276900  |
| C | 2.68018500  | -0.64250600 | -0.43407900 |
| C | 3.58365900  | 0.32608300  | 0.18851500  |
| C | 3.21307400  | 0.93992400  | 1.39369000  |
| C | 4.79985000  | 0.67835200  | -0.41156900 |
| C | 4.06119900  | 1.85987100  | 1.99987400  |
| H | 2.25964900  | 0.68814500  | 1.84946000  |
| C | 5.64863400  | 1.59085100  | 0.20665300  |
| H | 5.06956500  | 0.25730700  | -1.37490100 |
| C | 5.28452700  | 2.18238600  | 1.41439100  |
| H | 3.76546200  | 2.32576300  | 2.93431600  |
| H | 6.58951000  | 1.85273600  | -0.26642100 |
| H | 5.94459800  | 2.90000900  | 1.89046200  |
| C | 2.90486100  | -1.69772000 | -1.22887300 |
| C | 4.13576500  | -2.34925400 | -1.73371500 |
| H | 5.01025500  | -1.97791100 | -1.19916900 |
| H | 4.06037500  | -3.42956500 | -1.58556600 |
| H | 4.26627200  | -2.16170100 | -2.80399300 |
| O | 1.71545000  | -2.32355500 | -1.59771700 |
| C | -3.02922500 | -0.51058700 | 0.36186200  |
| O | -2.28539900 | -0.53297400 | -0.59167000 |
| O | -2.81958300 | 0.01863700  | 1.53849800  |
| H | -1.88632800 | 0.41377800  | 1.57726100  |
| C | -4.43733600 | -1.12203100 | 0.28550800  |
| F | -4.59178500 | -1.80182600 | -0.84528400 |
| F | -5.35817500 | -0.15425100 | 0.32760900  |
| F | -4.65650300 | -1.94546600 | 1.31206300  |

#### TS5

|   |             |             |             |
|---|-------------|-------------|-------------|
| C | -0.33784400 | -0.67573600 | -0.38635300 |
| O | -0.54954300 | -1.38258300 | 0.68310300  |
| N | 0.74165300  | -0.89789500 | -1.08763400 |
| H | 0.89043700  | -0.16211200 | -1.78201000 |
| C | -1.30666400 | 0.39797500  | -0.75393400 |
| C | -1.93214700 | 1.12729600  | 0.26056800  |
| C | -1.56321200 | 0.70259400  | -2.09445000 |
| C | -2.79652600 | 2.16761700  | -0.06638000 |
| H | -1.72929300 | 0.88733600  | 1.29863500  |
| C | -2.43942700 | 1.73250800  | -2.41518600 |
| H | -1.09982100 | 0.11396800  | -2.88086800 |
| C | -3.05393500 | 2.46791000  | -1.40164500 |
| H | -3.27072700 | 2.73971400  | 0.72449800  |
| H | -2.65104700 | 1.95597100  | -3.45540700 |
| H | -3.73675900 | 3.27249900  | -1.65449500 |

|   |             |             |             |
|---|-------------|-------------|-------------|
| C | 3.37895700  | -1.38379200 | -0.63737300 |
| H | 2.98462500  | -2.15495600 | -1.29544400 |
| N | 2.37232800  | -0.72670400 | 0.13541000  |
| C | 4.44536200  | -1.98599900 | 0.28671000  |
| F | 5.00174500  | -1.04759900 | 1.05460100  |
| F | 5.40557500  | -2.54551900 | -0.44707300 |
| F | 3.90294300  | -2.91397200 | 1.06502300  |
| C | 2.62444000  | 0.58420900  | 0.02149700  |
| C | 1.79302400  | 1.58954300  | 0.69240300  |
| C | 1.27914700  | 1.31917000  | 1.96615300  |
| C | 1.43748700  | 2.77342000  | 0.03451700  |
| C | 0.44328400  | 2.24100600  | 2.58576600  |
| H | 1.53930700  | 0.39050400  | 2.46333300  |
| C | 0.59307400  | 3.68713800  | 0.65653800  |
| H | 1.79411300  | 2.96682400  | -0.97300800 |
| C | 0.10064600  | 3.42510400  | 1.93360300  |
| H | 0.05252200  | 2.03131300  | 3.57581800  |
| H | 0.31044500  | 4.59725900  | 0.13841900  |
| H | -0.55851300 | 4.13891400  | 2.41686200  |
| C | 3.65398300  | 0.78120500  | -0.92211300 |
| C | 4.32124700  | 2.00411000  | -1.39104100 |
| H | 4.19723200  | 2.80451500  | -0.66171000 |
| H | 5.37738700  | 1.80297700  | -1.57670300 |
| H | 3.85768800  | 2.31442200  | -2.33553800 |
| O | 4.05999400  | -0.37443500 | -1.40581000 |
| C | -3.55036300 | -1.70109100 | 0.14242200  |
| O | -3.11252500 | -2.08561400 | -0.93810700 |
| O | -2.92955500 | -1.48509700 | 1.23255500  |
| H | -1.59644000 | -1.42175900 | 0.96359800  |
| C | -5.04865800 | -1.35247200 | 0.24155500  |
| F | -5.73704200 | -1.76653200 | -0.82384300 |
| F | -5.20150400 | -0.02064700 | 0.33313200  |
| F | -5.61141100 | -1.89391600 | 1.32995100  |

## IM9

|   |             |             |             |
|---|-------------|-------------|-------------|
| C | -1.80698500 | 0.07275700  | 0.83019900  |
| H | -2.24077700 | 0.18995200  | 1.82737100  |
| N | -0.55973100 | -0.58526100 | 0.83679300  |
| C | -2.81941500 | -0.59261700 | -0.11001900 |
| F | -2.31858100 | -0.68508300 | -1.33940800 |
| F | -3.93326700 | 0.12922200  | -0.15439000 |
| F | -3.10119200 | -1.80767200 | 0.33773000  |
| C | 0.33078800  | 0.22004000  | 0.37208600  |
| C | 1.74213700  | -0.10243100 | 0.16895400  |
| C | 2.08827400  | -1.42484500 | -0.13813300 |
| C | 2.73503300  | 0.87589900  | 0.30094600  |
| C | 3.42199500  | -1.76028800 | -0.32263400 |
| H | 1.30981700  | -2.17239800 | -0.24706500 |
| C | 4.06892900  | 0.52702000  | 0.12554800  |
| H | 2.47873300  | 1.89481300  | 0.56941800  |
| C | 4.41137700  | -0.78587700 | -0.19090000 |
| H | 3.69082500  | -2.78065000 | -0.57221400 |
| H | 4.84051600  | 1.28027600  | 0.23868200  |
| H | 5.45322700  | -1.05160000 | -0.33559400 |
| C | -0.33721600 | 1.51142200  | 0.01715800  |

|   |             |            |             |
|---|-------------|------------|-------------|
| C | 0.18772200  | 2.73284400 | -0.58077500 |
| H | 0.91581400  | 2.47182300 | -1.35399800 |
| H | -0.62260600 | 3.34966200 | -0.96581000 |
| H | 0.72906600  | 3.28131200 | 0.20308300  |
| O | -1.57437100 | 1.40773700 | 0.29357600  |

### IM10

|   |             |             |             |
|---|-------------|-------------|-------------|
| C | -2.23391900 | -1.27833100 | 0.01732900  |
| O | -1.62062100 | -2.15480800 | -0.79267200 |
| N | -3.21320600 | -1.68080300 | 0.73290000  |
| H | -3.60559800 | -0.87789900 | 1.22466700  |
| C | -1.74900100 | 0.13527700  | -0.04495200 |
| C | -1.37770400 | 0.69617400  | -1.26970200 |
| C | -1.68181600 | 0.90913800  | 1.11619100  |
| C | -0.97318600 | 2.02603800  | -1.33574500 |
| H | -1.41182800 | 0.08698900  | -2.16736300 |
| C | -1.26127200 | 2.23366200  | 1.05106500  |
| H | -1.93832400 | 0.46086300  | 2.07175100  |
| C | -0.91319100 | 2.79593100  | -0.17608100 |
| H | -0.69726500 | 2.45837700  | -2.29209100 |
| H | -1.19801400 | 2.82481200  | 1.95883700  |
| H | -0.58689600 | 3.82986700  | -0.22672800 |
| C | 1.18382500  | -1.09645700 | 0.07248100  |
| O | 0.70532400  | -1.42767700 | 1.16169800  |
| O | 0.82190200  | -1.40114000 | -1.09710900 |
| H | -0.66102500 | -1.87374600 | -0.96474400 |
| C | 2.35340600  | -0.08811200 | 0.12287600  |
| F | 3.06396600  | -0.18995900 | 1.25293900  |
| F | 1.87094700  | 1.16711300  | 0.06742800  |
| F | 3.20460900  | -0.22988400 | -0.90155900 |

### PhCOHNH

|   |            |             |             |
|---|------------|-------------|-------------|
| C | 3.14191300 | -1.42079100 | -0.79014900 |
| O | 2.79297000 | -2.02434000 | -1.95024900 |
| N | 2.23484500 | -1.03362900 | 0.01701600  |
| H | 2.65445100 | -0.63364400 | 0.85493000  |
| C | 4.61700100 | -1.30674900 | -0.63762300 |
| C | 5.46625000 | -2.15565300 | -1.35332600 |
| C | 5.16277500 | -0.35370500 | 0.22748200  |
| C | 6.84486000 | -2.06266800 | -1.18977300 |
| H | 5.04434500 | -2.89109500 | -2.02876100 |
| C | 6.54087200 | -0.25914000 | 0.38355200  |
| H | 4.51318600 | 0.33148600  | 0.76426000  |
| C | 7.38410400 | -1.11593000 | -0.32200500 |
| H | 7.49810900 | -2.72989200 | -1.74222500 |
| H | 6.95712800 | 0.48764300  | 1.05133800  |
| H | 8.45965500 | -1.04188600 | -0.19845400 |
| H | 1.82558700 | -2.10193800 | -1.95377200 |

### PhCONH2

|   |            |             |             |
|---|------------|-------------|-------------|
| C | 3.14672500 | -1.43252100 | -0.90363000 |
| O | 2.71211900 | -1.94594400 | -1.93611200 |
| N | 2.33025200 | -0.95988000 | 0.06098700  |
| H | 2.67601600 | -0.72306200 | 0.97806200  |
| C | 4.61963400 | -1.29396500 | -0.66410000 |

|   |            |             |             |
|---|------------|-------------|-------------|
| C | 5.47396700 | -2.15482500 | -1.35626500 |
| C | 5.15315100 | -0.33279900 | 0.19858700  |
| C | 6.84921100 | -2.07329400 | -1.16923500 |
| H | 5.04658700 | -2.88694900 | -2.03315000 |
| C | 6.53081500 | -0.24657900 | 0.37688400  |
| H | 4.50344700 | 0.36982800  | 0.71141700  |
| C | 7.37878600 | -1.11970700 | -0.30120500 |
| H | 7.50853000 | -2.75125500 | -1.70103500 |
| H | 6.94194900 | 0.50658900  | 1.04076500  |
| H | 8.45238300 | -1.05308000 | -0.15744700 |
| H | 1.33672900 | -1.09950700 | -0.05810100 |

## TS6

|   |             |             |             |
|---|-------------|-------------|-------------|
| C | 1.34577900  | -2.07268800 | -0.67806300 |
| O | 1.11337000  | -3.24800100 | -0.46434900 |
| N | 0.30211800  | -1.25643000 | -1.16084600 |
| H | 0.58830400  | -0.44848200 | -1.71129500 |
| C | 2.64995400  | -1.42922900 | -0.37463200 |
| C | 3.66779400  | -2.25967700 | 0.10945600  |
| C | 2.88263800  | -0.05691900 | -0.52702300 |
| C | 4.90732900  | -1.72506000 | 0.43213200  |
| H | 3.47192700  | -3.31989300 | 0.22542800  |
| C | 4.12508100  | 0.47384400  | -0.19553900 |
| H | 2.11702300  | 0.61727400  | -0.89913000 |
| C | 5.13601500  | -0.35733700 | 0.28140200  |
| H | 5.69500400  | -2.37189600 | 0.80268700  |
| H | 4.29907000  | 1.53840500  | -0.31270400 |
| H | 6.10437500  | 0.06084800  | 0.53578100  |
| C | -2.93491400 | -0.41543100 | -0.63941300 |
| H | -3.06736300 | -0.89731500 | -1.61217500 |
| N | -2.25760300 | 0.83223100  | -0.72403500 |
| C | -4.28602100 | -0.28060700 | 0.06219800  |
| F | -4.13399500 | 0.27773500  | 1.26177300  |
| F | -4.83837800 | -1.48035100 | 0.22201700  |
| F | -5.09702000 | 0.47652800  | -0.66719000 |
| C | -1.16903600 | 0.73886400  | -0.05474400 |
| C | -0.12556300 | 1.76241200  | 0.04491300  |
| C | 0.58269500  | 1.95563700  | 1.23664800  |
| C | 0.20201600  | 2.49737000  | -1.10069500 |
| C | 1.62609900  | 2.87373400  | 1.27273400  |
| H | 0.30622600  | 1.41221600  | 2.13464000  |
| C | 1.25510700  | 3.40382300  | -1.05842400 |
| H | -0.35245000 | 2.33658100  | -2.01964700 |
| C | 1.96973700  | 3.58694300  | 0.12525600  |
| H | 2.17233600  | 3.03026200  | 2.19630100  |
| H | 1.52016200  | 3.96388800  | -1.94846700 |
| H | 2.79403900  | 4.29198100  | 0.15458800  |
| C | -1.04429800 | -0.65178100 | 0.50643600  |
| C | -0.23024600 | -1.17045100 | 1.61729800  |
| H | 0.77551200  | -0.75102400 | 1.60323400  |
| H | -0.73981700 | -0.85635600 | 2.53749900  |
| H | -0.20722100 | -2.26125800 | 1.58595100  |
| O | -2.13090900 | -1.28425100 | 0.19817300  |
| H | -0.38487600 | -1.82372300 | -1.65816100 |

**3a·H<sup>+</sup>**

|   |             |             |             |
|---|-------------|-------------|-------------|
| C | 1.99766100  | -0.92515200 | -1.14945300 |
| O | 1.87087100  | -1.97868300 | -1.70030500 |
| N | 0.76356900  | -0.03847100 | -1.15626800 |
| H | 0.99890600  | 0.96084500  | -1.13065100 |
| C | 3.17911400  | -0.41086300 | -0.44911900 |
| C | 4.20635600  | -1.33461900 | -0.20829700 |
| C | 3.31075900  | 0.91965300  | -0.03052700 |
| C | 5.35047000  | -0.92883900 | 0.46208000  |
| H | 4.08773500  | -2.36019800 | -0.54063300 |
| C | 4.46344600  | 1.31776500  | 0.63318300  |
| H | 2.54350800  | 1.66260400  | -0.22608800 |
| C | 5.47765800  | 0.39489600  | 0.88355100  |
| H | 6.14260400  | -1.64226800 | 0.65856200  |
| H | 4.57017600  | 2.34761100  | 0.95402900  |
| H | 6.37307400  | 0.70995200  | 1.40890500  |
| C | -2.04883300 | -1.64839900 | -0.63250000 |
| H | -2.21817700 | -2.11578600 | -1.60646000 |
| N | -2.48431100 | -0.28459600 | -0.60585900 |
| C | -2.78096400 | -2.45459200 | 0.43426500  |
| F | -2.59259400 | -1.91649800 | 1.64387200  |
| F | -2.32414600 | -3.70769200 | 0.46369200  |
| F | -4.08985300 | -2.48796300 | 0.18741500  |
| C | -1.50381200 | 0.45399900  | -0.25149100 |
| C | -1.60196200 | 1.91803400  | -0.12169600 |
| C | -0.53125200 | 2.71870500  | 0.29783300  |
| C | -2.82390600 | 2.52751600  | -0.44582900 |
| C | -0.68224600 | 4.09924500  | 0.38962600  |
| H | 0.42959900  | 2.29463300  | 0.57058700  |
| C | -2.96912100 | 3.90310400  | -0.35048900 |
| H | -3.65343800 | 1.91157100  | -0.77271900 |
| C | -1.89799300 | 4.69332100  | 0.06743700  |
| H | 0.15342700  | 4.70727300  | 0.71793400  |
| H | -3.91890600 | 4.36160100  | -0.60317500 |
| H | -2.01318500 | 5.76943100  | 0.14173700  |
| C | -0.23652700 | -0.38788500 | -0.02395600 |
| C | 0.42116700  | -0.32691300 | 1.33894200  |
| H | 0.97868200  | 0.59278200  | 1.51199900  |
| H | -0.37273000 | -0.41203700 | 2.08342900  |
| H | 1.09331100  | -1.18096900 | 1.45012200  |
| O | -0.66539200 | -1.68190100 | -0.29331300 |
| H | 0.28603400  | -0.22537500 | -2.04991900 |

**3a**

|   |            |             |             |
|---|------------|-------------|-------------|
| C | 1.40938300 | -0.78772900 | -0.23365900 |
| O | 0.85092900 | -0.81528000 | -1.32926400 |
| N | 0.72445800 | -0.54702500 | 0.91511800  |
| H | 1.22001000 | -0.49745000 | 1.79507500  |
| C | 2.88481300 | -0.99637400 | -0.10121100 |
| C | 3.67624600 | -0.69851200 | -1.21289300 |
| C | 3.47698300 | -1.49193400 | 1.06339800  |
| C | 5.05402100 | -0.87118400 | -1.15332400 |
| H | 3.19842100 | -0.32759700 | -2.11347100 |
| C | 4.85583500 | -1.67365400 | 1.11577100  |
| H | 2.87136600 | -1.76995900 | 1.92083100  |

|   |             |             |             |
|---|-------------|-------------|-------------|
| C | 5.64482300  | -1.35812000 | 0.01176200  |
| H | 5.66703300  | -0.62877700 | -2.01494300 |
| H | 5.31260400  | -2.06903900 | 2.01674700  |
| H | 6.71993100  | -1.49833800 | 0.05707400  |
| C | -2.11736300 | -1.22400300 | -0.68607400 |
| H | -1.78991300 | -1.79406300 | -1.56183000 |
| N | -2.00000900 | 0.19292100  | -0.93513200 |
| C | -3.56260600 | -1.58517900 | -0.38560400 |
| F | -4.02576800 | -0.90349200 | 0.67043800  |
| F | -3.67494200 | -2.88871300 | -0.10613900 |
| F | -4.35404600 | -1.31805300 | -1.42844400 |
| C | -1.20135300 | 0.65662400  | -0.05797600 |
| C | -0.70706900 | 2.05055200  | -0.05291200 |
| C | -0.94202800 | 2.91426200  | 1.02112100  |
| C | 0.03158700  | 2.49220800  | -1.15489700 |
| C | -0.44578600 | 4.21417000  | 0.98506000  |
| H | -1.53563800 | 2.58414300  | 1.86732400  |
| C | 0.53433800  | 3.78945700  | -1.17921000 |
| H | 0.21633200  | 1.80902200  | -1.97778400 |
| C | 0.29614400  | 4.65094000  | -0.11047200 |
| H | -0.64230600 | 4.88705400  | 1.81311400  |
| H | 1.11096000  | 4.12698900  | -2.03402700 |
| H | 0.68573100  | 5.66346800  | -0.13226900 |
| C | -0.71181700 | -0.39472300 | 0.94370100  |
| C | -1.14919200 | -0.13657400 | 2.37607700  |
| H | -0.62742500 | 0.72583600  | 2.79591300  |
| H | -2.22616200 | 0.03597300  | 2.40277300  |
| H | -0.91701600 | -1.02033400 | 2.97599100  |
| O | -1.35143300 | -1.56687400 | 0.45113200  |

### IM11

|   |             |             |             |
|---|-------------|-------------|-------------|
| C | 1.98876000  | 0.79711100  | -0.57866100 |
| H | 1.90145300  | 1.46625400  | -1.44026900 |
| N | 1.47537400  | -0.50998300 | -0.88340900 |
| C | 3.45228600  | 0.70473900  | -0.17320500 |
| F | 3.61313800  | -0.11416100 | 0.87287900  |
| F | 3.92010300  | 1.90752900  | 0.17358300  |
| F | 4.19705000  | 0.24358600  | -1.18050000 |
| C | 0.51564200  | -0.74694000 | -0.07580200 |
| C | -0.26948600 | -1.99134000 | -0.07086800 |
| C | 0.26498200  | -3.13535400 | -0.67794000 |
| C | -1.54154700 | -2.04745700 | 0.51303500  |
| C | -0.46019300 | -4.31869100 | -0.69529500 |
| H | 1.25211900  | -3.08788800 | -1.12426800 |
| C | -2.26580400 | -3.23549600 | 0.48586800  |
| H | -1.98104100 | -1.16474800 | 0.96574000  |
| C | -1.72699400 | -4.37077600 | -0.11325900 |
| H | -0.03733000 | -5.20263200 | -1.16060200 |
| H | -3.25371800 | -3.27065500 | 0.93219100  |
| H | -2.29302100 | -5.29639600 | -0.12818400 |
| C | 0.30718300  | 0.39755000  | 0.92115400  |
| C | 0.44515500  | 0.02046300  | 2.37603400  |
| H | 1.41877800  | -0.45169200 | 2.51856200  |
| H | 0.38908400  | 0.92697200  | 2.98190100  |
| H | -0.34433300 | -0.66953200 | 2.67631600  |



|   |             |            |             |
|---|-------------|------------|-------------|
| O | 1.28496200  | 1.32059500 | 0.53810100  |
| C | -1.38785900 | 1.47555400 | -0.38126100 |
| O | -1.00303800 | 1.00359200 | 0.79980300  |
| O | -0.76562700 | 1.50386000 | -1.40612500 |
| C | -2.82859100 | 1.99913300 | -0.26045800 |
| F | -3.63786200 | 1.01575900 | 0.14117300  |
| F | -3.25084000 | 2.45230800 | -1.43165300 |
| F | -2.89394200 | 2.98440600 | 0.63476000  |

**TS7**

|   |             |             |             |
|---|-------------|-------------|-------------|
| C | -0.39393900 | 1.68429000  | -0.08949300 |
| H | -1.36425800 | 0.98238700  | -0.45052400 |
| N | 0.73468300  | 1.16849600  | -0.70293900 |
| C | -0.67217900 | 3.15601300  | -0.27322900 |
| F | 0.33357900  | 3.92062600  | 0.16766200  |
| F | -1.76965400 | 3.50114700  | 0.40238400  |
| F | -0.85950600 | 3.42034000  | -1.56422300 |
| C | 1.32880700  | 0.40187900  | 0.16389500  |
| C | 2.50334400  | -0.43630200 | -0.10593700 |
| C | 3.49890400  | 0.02433100  | -0.97335000 |
| C | 2.61378900  | -1.70017400 | 0.48268700  |
| C | 4.60577200  | -0.77283800 | -1.23830900 |
| H | 3.40482900  | 1.00605600  | -1.42562600 |
| C | 3.72327700  | -2.49380500 | 0.20950600  |
| H | 1.82001600  | -2.07698400 | 1.12038900  |
| C | 4.72026700  | -2.02974600 | -0.64545400 |
| H | 5.38093500  | -0.41267700 | -1.90610200 |
| H | 3.80391900  | -3.47765400 | 0.65881200  |
| H | 5.58608300  | -2.64945400 | -0.85435200 |
| C | 0.64662300  | 0.53436500  | 1.44541700  |
| C | 0.91035200  | -0.06515800 | 2.75946400  |
| H | 1.98485200  | -0.19881400 | 2.89755900  |
| H | 0.48392900  | 0.55551600  | 3.54710500  |
| H | 0.43333900  | -1.05142600 | 2.78112000  |
| O | -0.30368400 | 1.38747100  | 1.30520500  |
| C | -1.95915400 | -1.06481500 | -0.11294600 |
| O | -0.93652400 | -1.28846600 | 0.53915200  |
| O | -2.33653000 | 0.00561900  | -0.67839200 |
| C | -2.96610100 | -2.21879800 | -0.29885200 |
| F | -2.55524600 | -3.34191000 | 0.28934200  |
| F | -3.15246200 | -2.47721600 | -1.59872200 |
| F | -4.15461200 | -1.89063800 | 0.22400800  |

**5**

|   |             |             |             |
|---|-------------|-------------|-------------|
| C | 1.66029100  | -0.04171000 | -0.00961300 |
| N | 0.57292000  | -0.72087400 | -0.09188900 |
| C | 3.06895500  | -0.53912400 | -0.09208500 |
| F | 3.76606500  | -0.18517300 | 0.99381900  |
| F | 3.70058700  | -0.02179300 | -1.15244400 |
| F | 3.09117100  | -1.86405200 | -0.19497400 |
| C | -0.43345500 | 0.23926500  | 0.02470900  |
| C | -1.85650600 | -0.12022300 | -0.01683800 |
| C | -2.27029200 | -1.38243200 | 0.42485800  |
| C | -2.81242600 | 0.78169500  | -0.49965500 |
| C | -3.61685500 | -1.72770100 | 0.39977200  |

|   |             |             |             |
|---|-------------|-------------|-------------|
| H | -1.53078400 | -2.08679900 | 0.79137000  |
| C | -4.16008500 | 0.43447300  | -0.51620200 |
| H | -2.49929200 | 1.74597600  | -0.88827700 |
| C | -4.56644000 | -0.81900500 | -0.06501600 |
| H | -3.92649400 | -2.70808000 | 0.74707600  |
| H | -4.89144200 | 1.14083600  | -0.89525500 |
| H | -5.61700100 | -1.08988600 | -0.08248300 |
| C | 0.14126400  | 1.46632100  | 0.18715700  |
| C | -0.34772900 | 2.84720500  | 0.41026900  |
| H | -1.34516600 | 2.81929600  | 0.85178500  |
| H | 0.32687700  | 3.37161100  | 1.09024200  |
| H | -0.39801500 | 3.40919600  | -0.52718700 |
| O | 1.50126600  | 1.28131900  | 0.15677400  |
